# Supplementary material for: Using integrated transcriptomics and metabolomics to explore the effects of infant formula on the growth and development of small intestinal organoids
Source: Royal Society of Chemistry journal article supplement (doi:10.1039/d4fo01723d), 2024-01-01
Supplement: d4fo01723d1.pdf [file d4fo01723d1.pdf]

## SUPPLEMENTARY MATERIALS

### **Integrated transcriptomics and metabolomics explore the effects of infant formula on the growth and development of small intestinal organoids**

#### **Tables**

**Table S1. Ingredients of PMS1-3 formula milk powders.**

**Table S2. List of primers used in qRT-PCR experiments.**

**Fig.S1** Overall analysis of metabolomics data. (A) PCA analysis of metabolites in SIOs of PMS1-3. The PC1 and PC2 scores of different samples are visualized, and the variance contributed by their corresponding components is presented. (B) Heatmap of the quantity of metabolites of PMS1-3. (C) Volcano plots visualize the differential expressed metabolites of PMS1-3.

**Fig.S2** Bubble diagram illustrating the significant KEGG pathway for common DEGs and common differential expressed metabolites. Color of the dots indicates the level of significance, with red being the most significant and yellow being the least. The pathway impact values from the pathway topology analysis are represented by the size of the dots, and the range of the impact values is 0.00 to 1.00.

**Table S1. Ingredients of PMS1-3 formula milk powders.**

| <b>Group</b> | <b>Ingredients</b>                                                                                                                                                                                                                                                                                                                                                                                                                                                                                                                                                                                                                                                                                                                                                                                                                                                                                                                                                                                                                                                  |
|--------------|---------------------------------------------------------------------------------------------------------------------------------------------------------------------------------------------------------------------------------------------------------------------------------------------------------------------------------------------------------------------------------------------------------------------------------------------------------------------------------------------------------------------------------------------------------------------------------------------------------------------------------------------------------------------------------------------------------------------------------------------------------------------------------------------------------------------------------------------------------------------------------------------------------------------------------------------------------------------------------------------------------------------------------------------------------------------|
| <b>PMS1</b>  | <p>High oil whey powder [desalinated whey, thin cream, vegetable oil (soybean oil, sunflower seed oil, rapeseed oil, coconut oil), L-ascorbic acid sodium, phospholipids, mixed tocopherol concentrate, ascorbic acid palmitate], whole milk powder, polyfructose, arachidonic acid oil, eicoshexaenoic acid oil, whey protein powder, inositol, nucleotide, choline, L-tryptophan, L-carnitine, lutein, taurine.</p> <p>Minerals: tricalcium phosphate, calcium carbonate, potassium chloride, sodium chloride, magnesium sulfate, ferrous sulfate, zinc lactate, copper sulfate, manganese sulfate, potassium iodate, sodium selenite.</p> <p>Vitamins: Sodium L-ascorbate, dl-<math>\alpha</math>-Acetate tocopherol, niacinamide, D-calcium pantothenate, thiamine hydrochloride, retinol acetate, pyridoxine hydrochloride, folic acid, plant methylphenanthrene, D-biotin, cholecalciferol, cyanocobalamide, ascorbic palmitate, riboflavin.</p>                                                                                                              |
| <b>PMS2</b>  | <p>High oil whey powder [desalinated whey, thin cream, vegetable oil (soybean oil, sunflower seed oil, rapeseed oil, coconut oil), L-ascorbic acid sodium, phospholipids, mixed tocopherol concentrate, ascorbic acid palmitate], whey protein concentrate, polyfructose, arachidonic acid oil, eicoshexaenoic acid oil, whey protein powder, inositol, nucleotide, choline, L-tryptophan, L-carnitine, lutein, taurine, Lactobacillus lactis (with an added amount of <math>1 \times 10^9</math> CFU/100 g milk powder)</p> <p>Minerals: tricalcium phosphate, calcium carbonate, potassium chloride, sodium chloride, magnesium sulfate, ferrous sulfate, zinc lactate, copper sulfate, manganese sulfate, potassium iodate, sodium selenite.</p> <p>Vitamins: Sodium L-ascorbate, dl-<math>\alpha</math>-Acetate tocopherol, niacinamide, D-calcium pantothenate, thiamine hydrochloride, retinol acetate, pyridoxine hydrochloride, folic acid, plant methylphenanthrene, D-biotin, cholecalciferol, cyanocobalamide, ascorbic palmitate, riboflavin.</p>       |
| <b>PMS3</b>  | <p>High oil whey powder [desalinated whey, thin cream, vegetable oil (soybean oil, sunflower seed oil, rapeseed oil, coconut oil), L-ascorbic acid sodium, phospholipids, mixed tocopherol concentrate, ascorbic acid palmitate], whole milk powder, polyfructose, arachidonic acid oil, eicoshexaenoic acid oil, whey protein powder, inositol, lactoferrin, nucleotide, choline, L-tryptophan, L-carnitine, lutein, taurine, Lactobacillus lactis (with an added amount of <math>1 \times 10^9</math> CFU/100 g milk powder)</p> <p>Minerals: tricalcium phosphate, calcium carbonate, potassium chloride, sodium chloride, magnesium sulfate, ferrous sulfate, zinc lactate, copper sulfate, manganese sulfate, potassium iodate, sodium selenite.</p> <p>Vitamins: Sodium L-ascorbate, dl-<math>\alpha</math>-Acetate tocopherol, niacinamide, D-calcium pantothenate, thiamine hydrochloride, retinol acetate, pyridoxine hydrochloride, folic acid, plant methylphenanthrene, D-biotin, cholecalciferol, cyanocobalamide, ascorbic palmitate, riboflavin.</p> |

**Table S2. List of primers used in qRT-PCR experiments.**

| <b>Gene</b> | <b>Forward Primer (5'-3')</b> | <b>Reverse Primer (5'-3')</b> |
|-------------|-------------------------------|-------------------------------|
| ASPM        | GGCCCTAGACAACCCTAACGA         | AGCTTGGTGTTCAGAACATCA         |
| BCL2L1      | TTGCCAGCCGGAACCTATG           | CGAAGGCGACCAGCAATGATA         |
| BIRC5       | AGGACCACCGCATCTCTACAT         | AAGTCTGGCTCGTTCTCAGTG         |
| CASP3       | CATGGAAGCGAATCAATGGACT        | CTGTACCAGACCGAGATGTCA         |
| CCNB2       | CCGACGGTGTCCAGTGATTT          | TGTTGTTTTGGTGGGTTGAACT        |
| CCND1       | GCTGCGAAGTGGAAACCATC          | CCTCCTTCTGCACACATTTGAA        |
| CENPF       | CTCTCCCGTCAACAGCGTTC          | GTTGTGCATATTCTTGGCTTGC        |
| CXCR4       | ACTACACCGAGGAAATGGGCT         | CCCACAATGCCAGTTAAGAAGA        |
| ESR1        | CCCCTCAACAGCGTGTCTC           | CGTCGATTATCTGAATTTGGCCT       |
| FOXO1       | TCGTCATAATCTGTCCCTACACA       | CGGCTTCGGCTCTTAGCAAA          |
| HNF1A       | AACACCTCAACAAGGGCACTC         | CCCCACTTGAAACGGTTCCT          |
| HNF1B       | ACCAAGCCGGTCTTCCATACT         | GGTGTGTCATAGTCGTCGCC          |
| HNF4G       | ATGGACATGGCAAATTACAGTGA       | TTGACACCGTTGTCTGTGGTA         |
| HSP90AA1    | AGGAGTTGAGACGTTTCGC           | AGAGTTCGATCTTGTGTTGTTTCGG     |
| ICAM1       | ATGCCCAGACATCTGTGTCC          | GGGGTCTCTATGCCCAACAA          |
| IL18        | ATGCTCTGTTTGGGCTGGATA         | GTGAGAGTCGATTTCTGTGGC         |
| IL1B        | ATGATGGCTTATTACAGTGGCAA       | GTCGGAGATTTCGTAGCTGGA         |
| IRF1        | ATGCCCATCACTCGGATGC           | CCCTGCTTTGTATCGGCCTG          |
| KIF11       | TCCCTTGGCTGGTATAATTCCA        | GTTACGGGGATCATCAAACATCT       |
| KIF23       | AGTCAGCGAGAGCTAAGACAC         | GGTTGAGTCTGTAGCCCTCAG         |
| KIF2C       | CTGTTTCCCGGTCTCGCTATC         | AGAAGCTGTAAGAGTTCTGGGT        |
| MAPK8       | GCGCATGATCTCGTCCATCTC         | CCGACTCGTACTCGCTGTTG          |
| MYC         | GGATTCCCGCCTCAGAATAAC         | GTGGGTGTGGGTTGTTCAGG          |
| NEUROD1     | ATGACCAAATCGTACAGCGAG         | GTTTCATGGCTTCGAGGTCGT         |
| NEUROG3     | CTAAGAGCGAGTTGGCACTGA         | GAGGTTGTGCATTTCGATTGCG        |
| NFKBIA      | CTCCGAGACTTTCGAGGAAATAC       | GCCATTGTAGTTGGTAGCCTTCA       |
| NKX2-2      | CCGGGCCGAGAAAGGTATG           | GTTTGCCGTCCTGACCAA            |
| NKX6-1      | GGACTGCCACGCTTTAGCA           | TGGGTCTCGTGTGTTTTCTCT         |
| PAX4        | ATACCCGGCAGCAGATTGTG          | AAGACACCTGTGCGGTAGTAA         |
| RFX6        | AAGCAGCGGATCAATACCTGT         | ACCGTGGTAAGCAAACCTCCTT        |
| RRM2        | TGGTGAAGCGGCCTAATCC           | GCAACATGAGTCGAAAGGTCG         |
| SIRT1       | TAGCCTTGTCAGATAAGGAAGGA       | ACAGCTTCACAGTCAACTTTGT        |
| SOCS3       | CCTGCGCCTCAAGACCTTC           | GTCACTGCGCTCCAGTAGAA          |

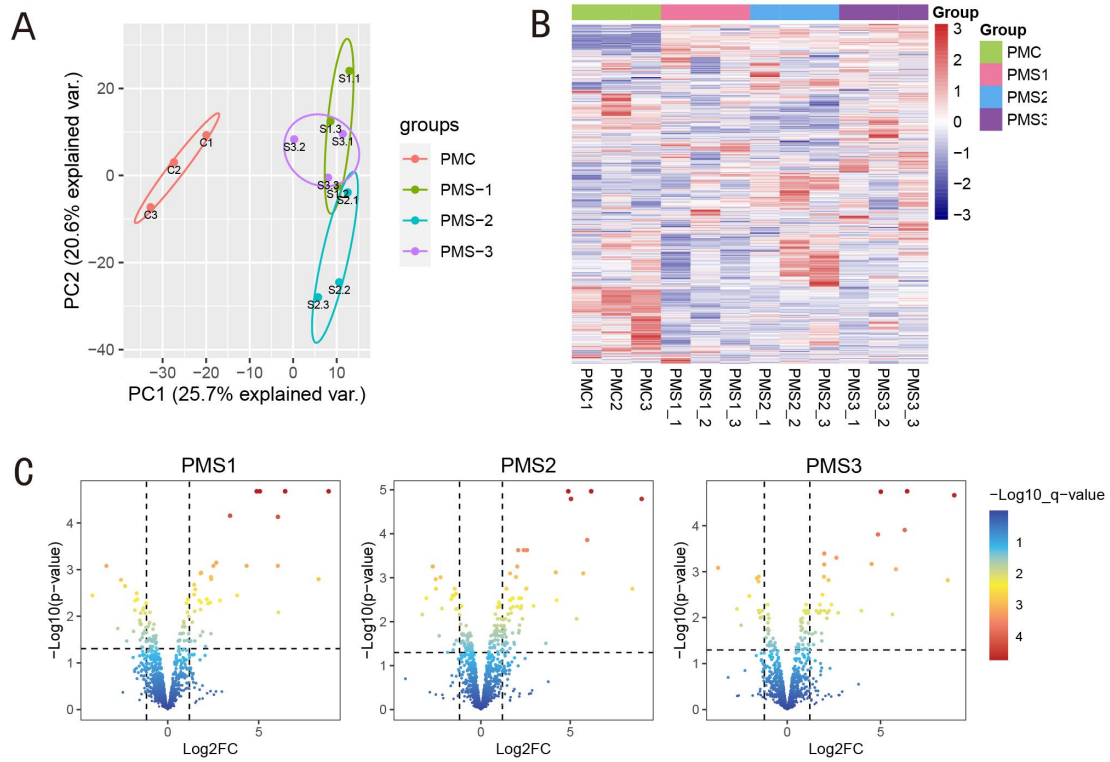

**Fig.S1** Overall analysis of metabolomics data. (A) PCA analysis of metabolites in SIOs of PMS1-3. The PC1 and PC2 scores of different samples are visualized, and the variance contributed by their corresponding components is presented. (B) Heatmap of the quantity of metabolites of PMS1-3. (C) Volcano plots visualize the differential expressed metabolites of PMS1-3.

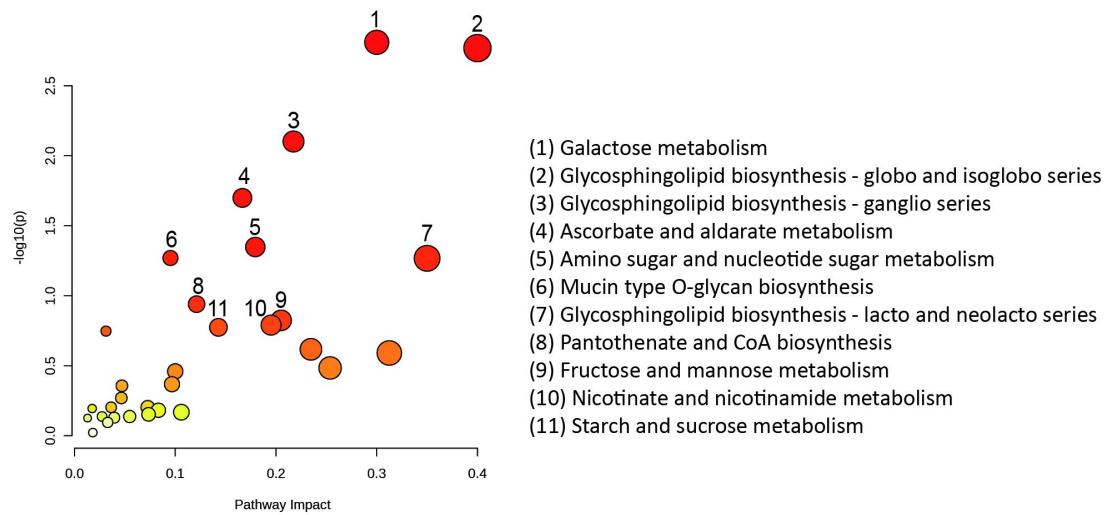

**Fig.S2** Bubble diagram illustrating the significant KEGG pathway for common DEGs and common differential expressed metabolites. Color of the dots indicates the level of significance, with red being the most significant and yellow being the least. The pathway impact values from the pathway topology analysis are represented by the size of the dots, and the range of the impact values is 0.00 to 1.00.
