# Supplementary material for: Using integrated transcriptomics and metabolomics to explore the effects of infant formula on the growth and development of small intestinal organoids
Source: Royal Society of Chemistry journal article supplement (doi:10.1039/d4fo01723d), 2024-01-01
Supplement: d4fo01723d2.xlsx [file d4fo01723d2.xlsx]

## Sheet: ReplicateRecalibration
Table S3. Profile of 17718 transcripts and their expression levels identified in this study.
gene_id	gene_symbol	PMC1	PMC2	PMC3	PMS1_1	PMS1_2	PMS1_3	PMS2_1	PMS2_2	PMS2_3	PMS3_1	PMS3_2	PMS3_3
gene:1	A1BG	0.008982	0.0321362	0.0332019	0	0.0725384	0.0997915	0.233608	0.286023	0.424739	0.18901	0.275305	0.194498
gene:29974	A1CF	5.14908	4.4032	5.17309	2.72007	3.38479	2.90513	1.9643	2.6565	2.31347	2.54199	2.56736	2.15859
gene:2	A2M	2.40125	2.47333	2.51735	1.72899	1.491	1.95407	3.18646	2.43582	2.47481	1.65901	1.58423	1.89132
gene:144568	A2ML1	0.059725	0	0	0	0	0	0	0	0	0	0	0
gene:127550	A3GALT2	0	0	0	0.071558	0.0166646	0.110814	0	0	0.0668203	0.185665	0	0.057593
gene:53947	A4GALT	0.434718	0.821556	0.753312	2.18075	2.43364	2.67894	3.01461	3.1646	2.99953	2.97846	2.39715	2.47351
gene:51146	A4GNT	0	0	0	0	0	0	0	0	0	0	0	0
gene:8086	AAAS	12.6849	14.1028	14.1758	9.46991	9.33071	10.8617	11.3383	10.0666	9.66977	8.86311	8.8879	11.5456
gene:65985	AACS	17.2885	19.0254	19.2553	18.6024	17.8381	18.4137	19.9621	18.6764	17.3506	18.7965	18.7434	18.7669
gene:13	AADAC	28.3541	27.9229	29.0181	22.5804	21.8596	22.2606	17.52	22.2997	23.7646	21.0971	22.3131	20.2206
gene:126767	AADACL3	0.098711	0.0413048	0.0649723	0.086662	0.030363	0.0673697	0.030705	0.0309198	0.0276354	0.059901	0.0273724	0.075582
gene:51166	AADAT	1.435	1.60873	1.8759	0.814539	0.655388	0.429001	0.838005	0.554969	0.613799	0.450324	0.820758	0.579391
gene:79719	AAGAB	15.5144	13.7725	14.496	24.4629	24.5185	24.9478	23.4999	22.9477	25.1167	27.442	25.9251	26.9057
gene:22848	AAK1	4.30276	4.6072	3.87714	3.67797	3.2488	3.08219	4.63462	3.41474	4.09248	5.06019	3.70114	2.67397
gene:28971	AAMDC	8.76481	8.0613	7.25342	15.2638	11.8441	14.1529	11.8356	15.2596	11.8295	12.7657	14.8534	16.5158
gene:14	AAMP	52.8836	55.4432	53.396	112.569	113.209	106.81	112.418	102.68	102.745	112.067	106.132	113.285
gene:15	AANAT	0	0	0	0	0	0	0.045302	0	0.0240433	0	0	0.0239005
gene:25980	AAR2	9.21658	9.49738	9.20786	5.68339	7.06434	6.5346	6.70642	5.72529	5.48989	6.31951	7.0864	7.17132
gene:441376	AARD	0	0	0	0.018127	0	0	0	0	0	0	0	0
gene:16	AARS1	45.4134	45.05	40.4702	18.3024	20.0084	23.2412	21.492	20.6643	22.2308	18.1395	18.6091	19.5112
gene:57505	AARS2	5.63835	5.35287	6.2544	6.2006	7.5302	6.66278	7.21626	5.90388	5.30367	7.42313	6.64597	7.1705
gene:80755	AARSD1	3.96999	5.08441	4.60376	5.54233	6.58006	6.37856	6.13721	6.59492	6.04308	6.60666	6.68406	5.15255
gene:132949	AASDH	2.12107	1.68239	1.51539	0.981517	1.1387	1.0049	1.63554	1.58031	1.18598	0.856995	0.9187	1.11731
gene:60496	AASDHPPT	5.99604	4.90331	5.34762	4.50021	4.23536	4.41074	5.95064	6.66158	5.76401	3.80367	4.05007	5.45605
gene:10157	AASS	0.043132	0.0553217	0.0578913	0.321466	0.166244	0.218301	0.286064	0.261243	0.257378	0.142826	0.316415	0.227481
gene:26574	AATF	14.2277	15.7369	15.3685	12.9929	13.0875	15.0772	17.3443	14.5703	15.0281	13.434	13.5918	16.4354
gene:9625	AATK	3.1167	3.98186	3.03827	0.835225	0.944455	0.755181	0.995588	0.898054	0.612393	1.1126	0.839027	0.864223
gene:18	ABAT	14.44	15.4024	17.1954	26.1186	25.2522	23.3784	25.1701	25.4526	24.6513	26.6213	24.9912	25.8775
gene:19	ABCA1	0.749153	0.501195	0.59751	1.09277	1.06918	1.04903	1.1825	1.52267	1.43747	1.0837	1.0507	0.946098
gene:10349	ABCA10	0.438803	0.174558	0.280518	0.164906	0.218052	0.167013	0.330859	0.338312	0.163183	0.084717	0.107746	0.0584551
gene:26154	ABCA12	0.015199	0.0307234	0.0474587	0.011204	0.00454264	0.0174091	0.011498	0.0110016	0.0153464	0.010744	0	0.00886536
gene:154664	ABCA13	0.089591	0.106217	0.104211	0.028714	0.136111	0.0487293	0.032641	0.0599725	0.0505603	0.062137	0.0238303	0.0338673
gene:20	ABCA2	4.85263	5.66434	4.98187	5.35756	5.75399	5.61541	7.13819	6.40768	5.50639	5.92273	4.88373	6.62228
gene:21	ABCA3	0.393272	0.612262	0.572006	0.300017	0.34537	0.403404	0.355744	0.42216	0.460378	0.407616	0.320961	0.261701
gene:24	ABCA4	0.09341	0.0731662	0.0820276	0.028113	0.0279944	0.0800368	0.094794	0.0538036	0.0542104	0.040436	0.0404932	0.0880646
gene:23461	ABCA5	9.91429	8.07551	7.18068	5.34199	5.25493	5.0431	4.41159	3.54861	3.6505	4.44474	3.97793	3.1628
gene:23460	ABCA6	0.058164	0.145786	0.034442	0.037449	0.0417216	0.0756925	0.025968	0.0171339	0.0489412	0.028591	0.0501728	0.0181886
gene:10347	ABCA7	1.21542	1.48772	1.24113	4.18339	4.2478	4.34088	4.80692	4.72282	4.64483	4.69179	4.1304	4.54097
gene:10351	ABCA8	0	0.0231118	0	0.051571	0	0.00907745	0.081742	0.00233662	0.01417	0	0.0182538	0.0086399
gene:10350	ABCA9	0.132451	0.17991	0.0987757	0.503533	0.193582	0.207901	0.100322	0.0983252	0.104021	0.167232	0.316278	0.133859
gene:5243	ABCB1	120.244	122.865	115.531	151.137	153.004	156.453	131.928	135.541	142.85	145.511	144.357	131.69
gene:23456	ABCB10	8.84487	8.37485	9.02134	4.78906	4.38411	4.33393	4.65245	4.56057	4.75034	4.61121	4.55776	3.89244
gene:8647	ABCB11	0.200546	0.122118	0.305295	0.106181	0.0809149	0.0656899	0.074103	0.113698	0.0959965	0.065477	0.0612269	0.0649467
gene:5244	ABCB4	0.155827	0.348939	0.392506	2.61238	2.49904	1.96256	1.80613	1.48339	1.56372	2.26225	2.61405	1.91768
gene:340273	ABCB5	0	0	0	0	0	0	0	0	0.00974474	0.010241	0	0
gene:10058	ABCB6	2.58594	3.21054	3.79675	2.7364	3.70575	3.55337	4.62079	2.64941	4.49811	3.88156	2.52998	3.19429
gene:22	ABCB7	8.98003	10.2712	8.46476	9.47503	8.30279	8.09546	7.06177	7.72528	6.89957	7.415	7.04487	10.2467
gene:11194	ABCB8	6.47191	7.52944	7.64546	8.6927	9.32495	10.2547	9.17525	10.3909	9.48944	10.0131	7.28676	9.11657
gene:23457	ABCB9	1.20625	1.2316	1.59313	9.69157	9.51406	8.52647	10.2411	9.78883	10.2914	10.2418	8.49962	10.2426
gene:4363	ABCC1	6.18568	6.38598	6.26657	12.5726	12.1215	13.37	15.3118	16.9201	13.7087	13.6831	12.842	14.087
gene:89845	ABCC10	6.85832	8.67769	7.47446	6.57133	6.39794	6.89434	6.70981	8.31512	7.27635	6.21823	5.73968	6.86001
gene:85320	ABCC11	0.028267	0.0494309	0.0388897	0.007222	0.02179	0.0235988	0.040054	0.0173815	0.00464763	0.033831	0.0136935	0.0103125
gene:1244	ABCC2	4.60942	4.93394	4.0774	2.97446	3.62102	3.09086	2.70872	3.07794	3.49999	3.2301	3.24294	2.56803
gene:8714	ABCC3	151.519	167.913	163.403	133.336	120.98	127.691	137.634	145.524	140.535	132.486	116.462	125.569
gene:10257	ABCC4	0.20216	0.366892	0.261283	1.42353	1.37841	1.33655	1.58681	1.4309	1.46004	1.40308	1.62784	1.73047
gene:10057	ABCC5	4.81492	5.56987	5.06859	17.2993	17.4306	17.3824	18.1354	20.8366	18.5031	17.874	17.729	16.4654
gene:368	ABCC6	5.59765	5.9633	5.83498	2.52629	1.87932	3.04192	2.73849	2.46427	2.67054	2.48082	2.37733	2.50031
gene:6833	ABCC8	0.261317	0.197447	0.38742	0.220435	0.256237	0.0777662	0.139224	0.194654	0.213218	0.3273	0.225053	0.436624
gene:10060	ABCC9	0.00432	0.00963745	0.00685033	0	0	0	0	0	0	0	0	0
gene:215	ABCD1	1.76037	1.78392	1.86934	4.54506	5.39332	4.9421	4.45077	4.75125	4.90359	5.07845	4.16626	5.74847
gene:5825	ABCD3	18.7739	17.0253	18.2962	33.1756	36.9903	35.5486	38.0846	38.5722	36.6747	32.4627	34.326	32.5314
gene:5826	ABCD4	15.3768	17.8154	16.3624	11.7781	13.307	13.7255	15.8674	12.7104	13.2061	16.8276	11.263	16.6879
gene:6059	ABCE1	5.33211	4.30893	5.15619	5.50789	5.57008	5.50898	4.21671	4.48238	5.01115	5.38205	6.19294	5.2028
gene:23	ABCF1	17.8478	18.2532	17.427	24.9478	24.4991	25.8088	26.0812	25.4415	25.0134	24.6619	25.5873	25.9283
gene:10061	ABCF2	4.31799	3.98179	4.37118	7.31911	7.6176	8.22722	7.17805	6.9352	8.00413	8.35556	7.63796	7.58648
gene:114483834	ABCF2-H2BK1	0.191644	0	0	0	0.0230716	0.129829	0	0.0198677	0	0	0.114216	0
gene:55324	ABCF3	18.3708	19.2954	20.3257	25.8489	26.4698	23.4388	24.3709	24.6133	21.8252	26.294	24.9541	25.597
gene:9619	ABCG1	2.82021	4.17977	2.99683	12.9563	12.8884	11.547	12.9198	16.7242	14.4111	12.2123	11.4479	13.5904
gene:9429	ABCG2	6.44213	8.33995	7.23902	11.7125	10.8464	12.2148	11.5597	16.6575	18.0917	11.8507	11.6842	10.5956
gene:64137	ABCG4	0	0	0	0.135302	0.096698	0.201831	0.079917	0.251987	0.157254	0.374359	0.0651155	0.114092
gene:64240	ABCG5	0	0.0549161	0	0	0.0303521	0	0	0	0	0	0	0
gene:64241	ABCG8	0.006405	0.00946111	0.0645875	0.021176	0.0238231	0.0443889	0.037528	0	0	0.121025	0.00642824	0.0422977
gene:84696	ABHD1	0.139144	0.0368943	0.137396	0.062191	0.116076	0.0655241	0.040179	0.108288	0.146417	0.122353	0.104567	0.0553107
gene:55347	ABHD10	5.18256	4.38397	4.55355	6.83625	6.60996	6.89669	8.08372	8.00263	8.47093	5.4966	5.79425	6.01296
gene:83451	ABHD11	73.6953	87.2009	79.4346	77.0174	77.0737	79.6808	89.6016	87.8966	77.0048	78.0648	73.3534	81.5049
gene:26090	ABHD12	54.4988	64.4377	57.6354	54.2023	53.4476	52.2538	50.5587	56.3778	61.5946	58.2437	54.7101	57.0765
gene:145447	ABHD12B	0.635239	0.608374	0.421144	0.08955	0.123891	0	0.104273	0.153933	0.0245682	0.030086	0	0.101863
gene:84945	ABHD13	2.82731	2.51663	2.53656	4.52845	4.30091	4.35666	3.95183	4.81277	4.30357	4.71022	4.5782	4.19306
gene:25864	ABHD14A	2.5219	2.34888	4.44786	3.19415	3.84111	1.96767	2.49147	2.05538	2.08085	2.24877	2.80273	2.70645
gene:100526760	ABHD14A-ACY1	4.01103	16.1647	3.69545	2.42774	0.441999	4.09992	3.23809	3.47472	1.59489	2.84403	4.50922	6.70155
gene:84836	ABHD14B	11.4777	12.8094	12.7443	8.33243	10.3524	9.46561	8.43499	6.93733	8.44803	8.93802	8.98155	9.71227
gene:116236	ABHD15	7.89226	7.95539	8.72344	3.64986	4.47427	4.3437	4.32489	4.23203	3.74384	4.88438	4.79105	4.68367
gene:7920	ABHD16A	24.4598	30.9655	27.653	32.7491	32.0455	33.5396	36.158	32.2346	31.736	34.0962	33.1678	35.1028
gene:140701	ABHD16B	0	0	0	0.002684	0	0.00419409	0	0	0	0.003675	0.0106263	0
gene:81926	ABHD17A	31.792	38.1857	37.1548	50.6647	49.1692	52.071	50.7662	39.5695	46.9227	43.0867	47.9919	53.0233
gene:51104	ABHD17B	4.95044	3.89562	4.95928	14.0222	16.0497	16.3701	17.4813	17.5159	16.8017	16.0603	16.0388	14.4994
gene:58489	ABHD17C	53.4012	54.3923	50.9657	36.4449	32.5023	31.3619	30.8195	29.481	29.3256	30.7827	31.2663	30.8045
gene:80167	ABHD18	2.88389	2.95926	2.85041	2.31972	2.82134	2.80697	2.97781	2.72506	2.97639	3.56228	2.68202	2.32141
gene:11057	ABHD2	22.9163	27.0902	23.4139	25.9333	26.1274	25.3076	24.1195	27.6231	27.9821	24.7608	24.957	24.566
gene:171586	ABHD3	41.3355	42.5909	39.7772	65.7678	71.8993	64.6994	71.9459	73.9485	73.7366	65.4506	64.2973	64.184
gene:63874	ABHD4	20.5639	21.3392	18.588	27.2365	26.3392	26.5856	24.5794	25.8175	30.05	27.3275	27.8542	27.1635
gene:51099	ABHD5	4.64893	4.91132	4.33989	5.56691	4.55074	4.32584	4.1492	3.9551	4.03212	4.05511	5.30462	3.77902
gene:57406	ABHD6	5.20803	5.3882	6.50681	18.7676	17.4498	19.2198	21.6519	18.8521	17.3751	17.8769	18.607	19.9999
gene:79575	ABHD8	3.32249	2.92034	2.89777	8.45356	9.02008	8.29391	8.39433	8.74059	8.92841	7.94994	7.21404	9.24193
gene:10006	ABI1	32.6406	27.5394	29.5586	25.4375	26.2775	25.3928	28.4985	29.726	28.1457	25.4834	25.5844	25.3607
gene:10152	ABI2	3.15452	2.95028	3.29864	4.19902	4.25362	4.16061	4.98739	4.65872	4.19008	3.99161	4.00741	4.23379
gene:51225	ABI3	0	0	0	0	0	0.136671	0	0	0	0	0	0
gene:25890	ABI3BP	0.024102	0.0116301	0.0358917	0.010552	0.026148	0.0263715	0.028368	0.0226827	0.0224281	0.034672	0.0310702	0
gene:54942	ABITRAM	11.5505	10.3474	10.1271	9.11106	9.89146	9.11999	9.07193	9.17386	10.8027	10.7858	8.87981	8.69171
gene:25	ABL1	13.6154	12.8907	13.4922	7.78564	8.26333	7.61386	7.71934	7.50357	7.19496	8.79141	7.65406	7.61316
gene:27	ABL2	1.34504	1.26519	1.50804	2.15637	2.08559	1.88056	1.86637	1.22403	1.34577	2.28843	1.94697	1.51099
gene:3983	ABLIM1	22.3503	22.2499	20.5581	23.9302	23.7251	23.0808	23.1123	24.7788	24.4573	22.8519	23.7292	21.9841
gene:84448	ABLIM2	0.061993	0.167997	0.269276	0.106149	0.496674	0.522505	0.25737	0.148607	0.212093	0.418057	0.204164	0.349482
gene:22885	ABLIM3	0	0	0	0.042728	0	0	0	0.0280038	0.0607478	0	0	0
gene:28	ABO	11.6227	9.11949	9.5048	2.7676	2.87894	2.47656	4.14631	4.32501	3.47459	3.31976	2.66659	2.97398
gene:29	ABR	64.37	77.4376	68.9759	53.1209	53.8204	50.5079	56.2246	53.0606	52.1843	59.3891	51.6844	56.1476
gene:137735	ABRA	0	0.0245972	0.0149327	0	0	0	0	0	0.020345	0	0.0257835	0.0202465
gene:58527	ABRACL	107.203	89.0851	99.724	68.241	71.7106	66.6168	67.1517	60.8327	62.0339	64.6079	76.6183	62.194
gene:84142	ABRAXAS1	4.28231	3.78699	3.6913	4.06369	5.19701	4.2205	4.98365	4.33284	4.05299	3.48388	3.48173	4.13373
gene:23172	ABRAXAS2	7.27163	5.3295	6.91449	9.31619	9.03217	10.5374	9.04804	8.77686	9.27651	7.91115	8.55839	8.89418
gene:29777	ABT1	12.8113	12.3189	11.8757	11.2198	11.6438	11.5696	12.6935	10.9536	10.9785	12.8327	11.8708	12.3812
gene:80325	ABTB1	13.4642	13.5474	13.2077	17.528	17.5462	17.7263	19.4675	18.3889	17.2662	19.2611	17.4	17.7156
gene:25841	ABTB2	5.18595	6.9773	6.73052	43.6033	44.8107	46.4271	52.0489	52	47.8562	50.9235	46.1113	51.768
gene:121551	ABTB3	0.200297	0.25715	0.329395	0.804531	0.779281	0.744004	0.992398	1.29234	0.815916	0.627048	0.647025	0.572983
gene:30	ACAA1	60.9524	69.7009	64.7519	100.583	101.868	101.25	113.423	107.618	101.859	106.091	97.4918	103.77
gene:10449	ACAA2	63.2924	65.9193	64.4563	47.6915	50.8522	41.4435	43.3729	47.1673	43.9871	46.2992	46.5679	44.2841
gene:31	ACACA	5.97656	6.18264	6.32969	7.10716	6.71688	6.36357	5.9566	6.81149	6.69942	7.10213	6.62418	6.46852
gene:32	ACACB	0.673885	0.842197	0.556515	0.396734	0.329819	0.358774	0.412446	0.567324	0.428905	0.30741	0.376756	0.335451
gene:80724	ACAD10	9.0962	8.66808	7.75704	6.96173	6.35691	7.45662	7.2681	7.20472	6.6198	7.19488	7.05009	7.23067
gene:84129	ACAD11	0.107045	0.485432	0.241952	1.5604	1.65824	1.40084	1.32593	1.59081	1.17819	1.26273	1.2473	1.78857
gene:27034	ACAD8	6.29359	7.55339	7.5509	11.8485	12.1255	10.4019	13.0075	13.6031	12.4748	10.8626	10.3188	13.16
gene:28976	ACAD9	8.57246	9.50733	9.19331	8.17736	7.73274	8.49257	9.09753	9.01386	9.65854	9.34962	7.51452	8.21454
gene:33	ACADL	0	0	0	0	0	0	0	0	0	0	0	0
gene:34	ACADM	27.0527	22.5841	23.3819	24.3144	30.0059	19.8398	27.4751	23.8257	27.711	25.8602	28.2018	23.2803
gene:35	ACADS	50.6906	56.0997	52.8203	33.0277	33.2355	33.572	42.602	38.9916	34.9404	33.263	31.9062	35.0442
gene:36	ACADSB	2.93346	2.25542	2.81153	2.88784	3.39646	3.48034	3.20786	3.37064	3.3441	2.4609	3.06914	2.94569
gene:37	ACADVL	261.66	333.086	307.663	330.814	303.922	342.054	364.702	344.738	345.365	340.556	308.048	329.705
gene:176	ACAN	0	0	0	0.006599	0	0	0	0	0	0.005565	0.00473454	0
gene:9744	ACAP1	0.134479	0.322892	0.304529	0.095583	0.269362	0.698664	0.810895	0.214247	1.44088	0.356313	0.155521	0.40289
gene:23527	ACAP2	10.4911	8.82964	9.22818	10.2515	11.8771	11.0326	9.68523	10.4944	11.2294	10.2929	10.409	8.92024
gene:116983	ACAP3	20.6548	23.9352	22.8692	45.6629	40.3753	44.2278	47.8036	40.8037	35.7576	50.1819	40.1799	46.3422
gene:38	ACAT1	8.70421	10.9908	9.88861	11.2317	12.0419	10.7505	13.1963	12.485	13.4273	11.3143	11.3749	12.1898
gene:39	ACAT2	49.1556	52.0957	54.7102	22.5094	22.6711	20.3208	21.707	27.0123	25.9821	20.478	22.9292	22.8244
gene:64746	ACBD3	19.9679	17.813	18.232	18.3077	17.9457	16.3667	15.2307	16.0102	16.7918	17.0475	17.5517	16.1793
gene:79777	ACBD4	4.10726	3.89244	4.34813	3.86577	3.1812	3.89475	5.89931	4.42502	4.78093	3.84903	2.76805	4.77838
gene:91452	ACBD5	21.0575	22.3292	20.7121	26.8902	31.2772	30.2239	21.9025	26.3052	27.2288	26.8737	31.1009	25.7294
gene:84320	ACBD6	9.06589	10.3674	10.1673	6.85101	5.81664	6.52607	6.86597	6.41572	4.59544	5.46096	4.68546	3.67336
gene:414149	ACBD7	0.284053	0.0718447	0.0685355	0.336485	0.327523	0.405319	0.567324	0.294342	0.583525	0.408885	0.219795	0.345856
gene:84680	ACCS	1.98347	2.12308	2.66954	1.39139	1.0577	1.02487	0.882487	1.34078	1.44476	1.28097	1.25871	1.08617
gene:390110	ACCSL	0	0	0	0	0	0	0	0	0	0	0	0
gene:65057	ACD	9.55381	8.81979	8.45493	9.77572	8.40018	11.1257	11.5931	10.6981	9.64588	10.4726	9.62894	11.0005
gene:1636	ACE	2.47474	2.53668	2.37254	1.44284	1.39569	1.62575	1.3266	1.48566	1.28589	1.25505	1.44181	1.15018
gene:59272	ACE2	57.3238	73.433	55.2043	53.6221	61.4683	49.0115	38.825	37.9476	42.4759	49.3614	48.6487	45.2185
gene:125981	ACER1	0	0	0.0331707	0	0	0	0	0	0	0	0.0392557	0
gene:340485	ACER2	11.3225	11.5787	11.0838	8.66643	9.35591	8.00976	8.41639	8.60069	9.0745	8.54866	7.72378	8.37438
gene:55331	ACER3	2.26263	1.91308	2.49421	1.38599	1.59718	1.72569	1.9065	2.07709	2.00379	1.45411	1.75761	1.53368
gene:43	ACHE	8.67329	12.4036	9.36071	13.6284	14.161	14.9324	12.4304	10.316	11.1764	15.3369	15.3359	15.3028
gene:22985	ACIN1	70.9411	72.8095	65.4462	65.2205	67.9353	67.9566	66.9428	67.8253	68.2504	70.7963	66.2914	70.3622
gene:2532	ACKR1	0	0	0	0.082074	0	0.0448891	0	0	0.0236654	0.022068	0	0
gene:1238	ACKR2	1.02103	1.29059	1.48957	1.06818	1.52312	1.54639	1.85291	2.23302	1.92863	1.00926	1.21897	1.5097
gene:57007	ACKR3	0.211814	0.110738	0.172704	0.111259	0.107541	0.242601	0.331125	0.0415114	0.0913914	0.105681	0.0563827	0.1357
gene:51554	ACKR4	0.385684	0.402173	0.369976	0.126874	0.167813	0.35491	0.304801	0.0421334	0.0712301	0.181049	0.093187	0.136299
gene:47	ACLY	47.421	50.5485	52.3841	79.6307	78.7608	80.2138	85.5311	91.0119	85.0895	82.9146	74.98	84.7459
gene:130013	ACMSD	0.414984	0.478944	0.432298	0.078943	0.152641	0.278221	0.396535	0.352524	0.530765	0.190699	0.118118	0.135108
gene:48	ACO1	10.1629	8.74495	10.2241	9.50973	8.39402	9.93307	10.9465	12.9848	8.96495	7.70263	8.04177	9.10153
gene:50	ACO2	105.887	110.985	109.764	85.8456	80.8163	84.6402	80.6709	83.4766	73.8159	81.7274	80.4604	88.3688
gene:641371	ACOT1	8.73685	10.1499	12.0402	2.53524	3.39021	2.72136	2.82735	3.53572	2.91359	3.16581	2.9908	3.10189
gene:26027	ACOT11	21.9844	26.98	24.268	14.0351	14.0719	12.8199	18.8608	18.9649	19.2756	14.2698	12.9807	14.9937
gene:134526	ACOT12	0	0	0	0	0	0	0	0	0	0	0.0405784	0.0498957
gene:55856	ACOT13	4.19809	4.87341	4.35979	3.08666	2.83626	2.71379	3.36523	3.11085	3.25186	2.79753	3.21894	2.78435
gene:10965	ACOT2	23.8716	23.4205	23.8876	9.19524	9.88064	8.38097	10.5165	10.8392	9.0794	8.68408	9.08036	9.88014
gene:122970	ACOT4	1.81417	2.41056	1.25335	0.187382	0.170287	0.130033	0.560429	0.542813	0.532897	0.303303	0.279728	0.302583
gene:641372	ACOT6	0	0	0	0	0	0	0	0	0	0	0	0
gene:11332	ACOT7	24.535	27.2685	22.8196	34.9633	35.0703	35.505	35.3281	35.9916	32.1524	36.1734	31.4034	39.3264
gene:10005	ACOT8	21.2102	21.363	21.9607	18.6574	22.0663	18.8787	21.8215	19.81	20.3579	19.0413	19.7782	23.2273
gene:23597	ACOT9	4.26458	5.87107	4.39321	5.98335	5.47292	6.49886	7.82248	7.06533	8.21865	8.06366	7.16906	5.77679
gene:51	ACOX1	17.5371	20.6139	18.4694	24.6497	21.4662	20.2811	24.1814	36.2197	24.6396	24.1749	22.3255	20.5857
gene:8309	ACOX2	1.65098	1.65185	2.16196	2.30667	2.36839	2.55406	1.7111	1.61593	1.80168	2.94764	2.25078	2.19862
gene:8310	ACOX3	5.152	6.01249	5.47071	5.06553	4.6955	5.36485	6.75433	6.34846	5.97326	5.4678	4.92781	5.615
gene:55289	ACOXL	0.023746	0.0111405	0.0343393	0.031417	0.0467676	0.0565481	0.077954	0.0472019	0.0468407	0.025813	0.0676483	0.160712
gene:52	ACP1	64.2143	60.5106	65.4642	74.8382	72.7887	67.2809	75.4571	73.3486	75.3034	78.4094	71.6264	75.1335
gene:53	ACP2	37.882	35.5047	37.0905	21.2415	21.3887	22.5766	20.9333	24.7979	20.6798	19.2736	18.7139	22.7229
gene:55	ACP3	1.34161	1.12365	0.841043	0.690836	0.565328	0.742652	0.372569	0.6732	0.54813	0.619819	0.68005	0.730492
gene:93650	ACP4	0.093711	0.0195529	0.0478828	0.224487	0.240798	0.160637	0.064578	0.129627	0.178417	0.306334	0.194934	0.102487
gene:54	ACP5	3.63519	4.70467	4.48238	2.94505	2.86607	2.68927	3.07268	2.42866	2.79014	2.56114	3.11537	4.19
gene:51205	ACP6	4.61869	4.2556	5.0562	3.11899	3.06758	3.73752	3.58744	3.8021	3.45651	4.43152	3.11515	3.50695
gene:390928	ACP7	0	0.0679528	0	0	0	0	0	0	0	0	0	0
gene:49	ACR	0	0	0.0333812	0	0	0	0.009395	0	0	0	0	0
gene:84519	ACRBP	0.174696	0.202767	0.213667	0.136065	0.455606	0.528348	0.270606	0.347813	0.200666	0.393427	0.177889	0.414056
gene:56	ACRV1	0	0	0.0175892	0.059946	0	0.141128	0	0.0651876	0.0254914	0.13954	0.121914	0
gene:23205	ACSBG1	0.056325	0.0274041	0.132405	0.261282	0.503859	0.485897	0.405314	0.441028	0.0910009	0.244573	0.376289	0.306003
gene:81616	ACSBG2	0.034317	0.026121	0	0	0.0133917	0.0193423	0.033484	0.0257186	0	0.011321	0	0.0401414
gene:80221	ACSF2	25.0192	25.6764	26.0604	47.5705	48.516	49.8195	48.966	43.7324	46.1528	51.3174	46.6723	50.1586
gene:197322	ACSF3	7.00392	7.21994	6.7389	4.66843	4.81862	4.07315	5.35172	4.1702	3.898	3.89181	3.93928	4.37308
gene:2180	ACSL1	15.7575	15.4156	15.587	17.4451	17.3632	16.7674	15.6473	18.5766	17.9563	18.7947	16.9644	17.0082
gene:2181	ACSL3	20.8958	22.1331	25.5408	38.1977	40.3647	37.8297	42.1596	48.0175	43.5419	38.2097	27.8913	33.3178
gene:2182	ACSL4	4.63516	4.11731	4.78362	7.15909	7.25537	7.59075	7.79114	8.32685	8.67641	6.92526	7.24869	5.09986
gene:51703	ACSL5	33.5464	38.1169	33.2958	34.6152	35.0254	33.9853	32.1571	35.5262	37.6478	34.4704	34.1737	31.9675
gene:23305	ACSL6	0.225729	1.14921	0.331923	0.551147	0.394528	0.337269	0.304711	0.381698	0.356078	0.228078	0.234244	0.386249
gene:116285	ACSM1	0.074372	0.175505	0.0989006	0.021074	0.0271705	0.0326851	0	0.0559085	0.0867302	0	0.0316067	0.0280551
gene:6296	ACSM3	2.10154	1.66677	2.02175	2.79132	3.14069	1.9404	2.75222	2.30556	2.61965	2.66123	2.96916	2.49037
gene:341392	ACSM4	0	0	0	0	0	0	0	0	0	0	0	0
gene:142827	ACSM6	0	0	0	0.139169	0.0284084	0	0.03615	0	0	0.021137	0.107614	0
gene:84532	ACSS1	10.0894	9.33493	9.49431	5.51806	5.74781	5.48537	5.24213	4.64945	5.28668	5.63319	5.09261	5.50785
gene:55902	ACSS2	166.826	176.739	172.677	102.256	101.771	96.6314	101.692	115.963	112.606	104.227	96.5157	100.825
gene:79611	ACSS3	0.36895	0.323508	0.283295	0.125743	0.120415	0.103602	0.321921	0.16715	0.164961	0.160979	0.198853	0.239185
gene:58	ACTA1	0.059552	0.0231378	0	0.255299	0.0757339	0.162652	0.159246	0.122409	0.158201	0.175353	0.145677	0.104402
gene:59	ACTA2	9.18924	8.99756	11.2616	5.8829	5.19085	5.542	7.18748	4.66992	5.21058	6.11861	6.86477	6.63571
gene:60	ACTB	989.719	1195.74	1052.17	881.269	826.44	845.809	1055.7	1064.3	940.693	865.147	826.901	913.906
gene:345651	ACTBL2	0	0	0	0	0.0340331	0	0	0	0	0	0	0.0199565
gene:71	ACTG1	2745.77	2900.56	2844.41	3010.22	3072.85	2971.37	3307.4	2651.81	2249.34	2954.42	2870.78	3118.85
gene:72	ACTG2	0	0	0	0	0	0	0.020811	0.0247796	0	0.292685	0.0950647	0
gene:170487	ACTL10	0.830641	1.1634	1.1946	0.495007	0.314942	0.573369	0.449443	0.238479	0.31891	0.288193	0.44714	0.278499
gene:86	ACTL6A	14.8522	14.7736	15.8017	12.3043	10.3896	12.6096	13.5301	14.8298	15.8817	10.0791	10.6536	11.642
gene:51412	ACTL6B	0.057682	0.0636211	0	0.090756	0.0405195	0.146182	0	0.0673429	0.0307606	0.078101	0.031266	0
gene:10881	ACTL7A	0.029776	0	0	0	0	0	0	0	0	0	0	0
gene:10880	ACTL7B	0.030091	0	0	0	0.0308703	0.0397181	0	0.00158977	0.0299041	0	0	0
gene:81569	ACTL8	0	0	0	0	0	0	0	0	0	0	0	0
gene:87	ACTN1	43.9042	43.4329	51.8381	30.6057	32.3492	32.9075	37.519	39.3129	30.318	31.1329	33.044	37.5323
gene:88	ACTN2	0	0	0	0	0	0	0.004206	0	0	0.004857	0	0.00942255
gene:89	ACTN3	0	0	0	0	0.0139426	0.0823463	0	0.0424306	0	0.129709	0.100132	0.0101247
gene:81	ACTN4	608.161	776.199	730.459	513.442	588.607	519.38	670.614	660.411	564.479	585.423	431.801	592.934
gene:55860	ACTR10	17.7344	16.2112	16.4647	13.4188	13.5592	12.6683	17.2639	15.8823	18.8118	12.2212	13.1795	12.7317
gene:10121	ACTR1A	24.1577	26.4056	25.7969	26.532	26.8948	28.1462	25.966	25.7658	24.5679	28.033	27.5545	28.2832
gene:10120	ACTR1B	24.614	29.9379	27.864	32.8658	33.8871	32.399	45.318	44.8106	40.3228	35.9326	33.5163	35.9697
gene:10097	ACTR2	98.8569	91.9202	87.7957	62.2697	63.0929	58.3367	60.7448	66.919	70.1514	54.4692	60.576	54.2414
gene:10096	ACTR3	47.076	45.8906	44.1527	30.3096	29.9839	29.3079	30.7489	33.3664	32.9666	29.5746	31.9969	26.7225
gene:57180	ACTR3B	2.46613	3.36113	3.56131	3.90765	3.70843	3.50153	6.22882	6.11864	5.16931	3.59286	3.43521	4.42019
gene:653857	ACTR3C	0.062009	0.0563808	0	0.043776	0.100075	0.067745	0.043887	0.0465551	0.0944576	0.15729	0.062248	0.225383
gene:79913	ACTR5	1.65078	1.78875	1.81153	2.15472	1.79299	1.87949	1.87367	1.84376	1.98258	2.23989	2.06829	1.97843
gene:64431	ACTR6	5.78432	4.45543	5.7025	15.7684	18.7127	16.5723	18.2483	18.987	19.466	15.769	16.7047	16.954
gene:93973	ACTR8	6.68874	6.41135	5.78339	3.81228	3.96735	3.6923	4.59528	4.5575	4.05584	3.63791	3.53096	4.02756
gene:84517	ACTRT3	0.312578	0.600737	0.206231	0.131004	0	0	0.110067	0.114854	0.219293	0.057707	0.10847	0.0304765
gene:90	ACVR1	1.86401	2.17453	1.98434	1.97509	1.79526	2.15704	2.80729	2.76152	2.5945	2.13017	1.73088	1.58936
gene:91	ACVR1B	23.2491	24.6411	23.3726	10.5933	11.2435	11.0899	10.8478	13.1965	11.653	10.9329	11.1494	10.2605
gene:130399	ACVR1C	0.37727	0.343729	0.316514	0.278327	0.290046	0.260928	0.225919	0.237228	0.19643	0.256606	0.300456	0.267214
gene:92	ACVR2A	4.73701	3.93193	4.83625	5.63026	4.36798	5.14127	4.83461	5.39249	4.55538	4.89113	5.03462	4.8977
gene:93	ACVR2B	0.852086	0.879776	0.886135	0.726032	0.685341	0.8021	0.719879	0.780853	0.917533	0.673041	0.858816	0.613486
gene:94	ACVRL1	14.9787	17.8826	17.5231	8.44637	9.49905	9.204	9.40993	10.2148	11.9063	9.30913	9.40951	9.04302
gene:95	ACY1	41.63	38.0882	51.4166	36.2316	36.2811	33.7637	32.751	35.9763	40.3541	32.6217	36.531	31.3143
gene:91703	ACY3	0.420841	0.548532	0.385808	0.581947	0.291798	0.467785	0.230763	0.262879	0.0999907	0.501703	0.374399	0.513525
gene:97	ACYP1	7.71034	6.41613	6.03081	7.5687	9.79388	10.4491	11.8855	10.7529	11.5187	9.5493	10.2652	8.4499
gene:98	ACYP2	3.78849	3.18086	3.24193	3.03369	3.57259	2.95629	3.80141	3.5393	3.53576	1.78338	3.33161	2.66503
gene:100	ADA	0.139907	0.181146	0.066559	0.527135	0.389259	0.36609	0.423144	0.57995	0.600862	0.931278	0.434583	0.489856
gene:51816	ADA2	4.01346	3.61563	4.00021	3.58386	3.54904	3.2185	2.87222	3.45176	2.92784	3.95451	3.77539	2.92764
gene:161931	ADAD2	0	0	0	0	0	0.0197606	0	0	0	0	0	0
gene:161823	ADAL	1.15673	1.40517	0.814731	0.652895	0.866729	0.571819	0.739931	1.13378	0.77591	0.499703	0.667005	0.766677
gene:102	ADAM10	29.0174	24.1492	25.5406	25.4912	24.4928	23.7383	24.0686	25.9476	27.3313	24.7045	24.5044	23.1056
gene:4185	ADAM11	0	0	0.0271374	0.064492	0.0740602	0.0432181	0	0.0658403	0.0318161	0.028538	0.12447	0.0967979
gene:8038	ADAM12	0.017931	0.00522586	0	0.045317	0.0359947	0.0313124	0.061596	0.0796916	0.0525893	0.113581	0.0357675	0.0747566
gene:8751	ADAM15	6.04864	8.42903	6.9487	15.6192	17.2567	14.7371	16.6442	17.9411	15.979	16.8237	15.9267	17.2833
gene:6868	ADAM17	4.96758	4.38969	4.2325	7.58974	6.79584	7.23504	8.05234	7.81872	7.33068	7.11088	7.1047	7.57143
gene:8728	ADAM19	0.288701	0.391845	0.23892	0.210833	0.247558	0.16601	0.257827	0.403634	0.241999	0.295851	0.184033	0.219185
gene:2515	ADAM2	0.016874	0	0	0	0	0	0	0	0	0	0	0
gene:8748	ADAM20	0	0.0412073	0	0	0	0.000998315	0.023593	0.0652094	0	0.019631	0.0200856	0.0470144
gene:8747	ADAM21	0	0	0	0	0	0.0751358	0	0.0122299	0.0241071	0.021377	0	0
gene:53616	ADAM22	0.742034	1.21116	0.570422	0.635071	0.705534	0.672079	0.753272	0.777916	0.605989	0.860841	0.779846	0.596764
gene:8745	ADAM23	0	0	0	0	0	0	0	0	0	0	0	0
gene:10863	ADAM28	2.36952	2.53939	2.36273	2.61689	1.61091	1.6955	1.68231	1.61464	1.83797	1.85417	1.87552	1.32823
gene:11085	ADAM30	0	0	0	0	0	0	0	0	0	0	0	0
gene:203102	ADAM32	0.009514	0.0783184	0.0436446	0.07421	0.28164	0.10874	0.037651	0.183814	0.0454487	0.24435	0.126048	0.127898
gene:8756	ADAM7	0	0	0	0	0	0	0	0	0	0	0	0
gene:101	ADAM8	0.615797	1.1175	1.23676	3.04969	3.00431	2.9214	3.58655	3.81978	3.40276	3.14389	2.8591	3.99707
gene:8754	ADAM9	53.2262	52.1792	46.5476	42.3726	47.6592	41.5238	47.628	44.6547	48.1038	41.408	46.3499	40.889
gene:9510	ADAMTS1	0	0	0.0094736	0	0	0	0	0.00817866	0.0275619	0.036344	0.0379243	0.0287076
gene:81794	ADAMTS10	0	0	0	0	0	0	0.013532	0	0	0.007561	0.0142418	0
gene:81792	ADAMTS12	0	0	0	0.006159	0	0	0	0	0	0	0	0
gene:11093	ADAMTS13	0.342423	0.263499	0.366233	0.276938	0.485388	0.507972	0.337486	0.220389	0.269822	0.41406	0.396574	0.457438
gene:140766	ADAMTS14	0.080943	0.0427996	0.0769141	0	0.00821468	0.00822635	0	0.0184691	0.0100831	0	0	0.0423096
gene:170689	ADAMTS15	2.29578	2.15202	2.53577	1.13601	1.11353	0.920073	0.954798	0.641873	0.953275	1.22726	1.12993	1.1022
gene:170690	ADAMTS16	0	0	0	0	0	0	0	0	0	0	0	0
gene:170691	ADAMTS17	6.52419	7.03246	5.06457	3.39543	4.009	5.16071	4.10017	6.38081	3.64018	4.79803	4.4042	3.67991
gene:170692	ADAMTS18	0	0	0	0	0	0	0.01609	0	0	0	0	0
gene:171019	ADAMTS19	0.010202	0.00758569	0	0.008492	0.0201034	0.0591716	0	0.0265081	0.0107008	0	0.010778	0.00929144
gene:9509	ADAMTS2	0	0	0	0	0	0	0	0	0	0	0	0
gene:80070	ADAMTS20	0	0.00693739	0	0	0	0	0	0	0	0	0	0.00877001
gene:9508	ADAMTS3	0	0	0	0	0	0	0	0	0	0	0	0
gene:9507	ADAMTS4	0	0	0	0	0.0115472	0	0	0	0.00347702	0	0.00571454	0.00570299
gene:11096	ADAMTS5	0	0.0105617	0.00572506	0	0	0	0.0059	0	0	0	0.00582712	0
gene:11174	ADAMTS6	0	0.0152264	0.02532	0.150835	0.168064	0.149595	0.28709	0.269835	0.274781	0.224055	0.212203	0.273448
gene:11173	ADAMTS7	0.028614	0.0212395	0.10261	0.078964	0.0716161	0.0137697	0.04943	0.0381763	0.0841812	0.087675	0.0177721	0.0540413
gene:11095	ADAMTS8	0.023792	0.0147731	0.0399787	0	0	0	0	0	0	0	0.0106615	0.00901633
gene:56999	ADAMTS9	2.24951	3.31472	1.99407	0.85544	0.936984	0.816224	1.09883	1.05162	1.38502	0.892333	1.00015	0.846184
gene:92949	ADAMTSL1	0.006828	0	0.00505615	0	0	0	0	0.0149676	0	0.00423	0	0.00961523
gene:9719	ADAMTSL2	0.025724	0	0.0128131	0	0	0	0.026588	0	0	0	0	0
gene:57188	ADAMTSL3	0.00727	0	0	0	0	0	0	0	0	0	0.013671	0
gene:54507	ADAMTSL4	1.07232	0.734489	0.859257	2.98185	3.68525	3.32079	3.96915	3.4013	2.41801	3.48678	3.22446	3.49614
gene:339366	ADAMTSL5	24.4849	27.1915	25.4259	20.813	17.3725	21.5216	20.4649	19.3979	19.6153	21.664	16.8882	19.2731
gene:11033	ADAP1	66.1938	74.4105	70.8938	39.7907	37.1793	38.9968	31.6978	33.6529	31.7303	40.1824	37.5345	41.3533
gene:55803	ADAP2	0.064283	0.304946	0.0412047	0.556864	0.0495373	0.297637	0.331043	0.235022	0.286003	0.248533	0.160692	0.173571
gene:103	ADAR	24.8925	26.4747	25.9183	20.4718	20.51	19.1706	19.5616	19.1373	19.6986	21.8149	19.1811	21.0193
gene:104	ADARB1	0.480039	0.563539	0.516185	1.31788	1.14247	1.43206	1.62469	1.08264	1.16478	1.37837	1.08701	0.94282
gene:105	ADARB2	0	0	0	0	0	0	0	0	0	0	0	0
gene:23536	ADAT1	1.48797	1.38626	1.46235	1.35614	1.33835	1.36096	2.70048	2.20768	1.86995	1.1037	1.34771	1.57084
gene:134637	ADAT2	0.886589	1.06519	0.988464	1.14894	1.14432	1.07131	1.66383	0.880068	0.90028	1.36549	0.824377	0.873492
gene:113179	ADAT3	11.4508	11.7117	10.629	10.3461	9.87407	9.1229	8.2668	9.0354	7.64609	11.0865	9.22581	9.81415
gene:57143	ADCK1	1.65099	2.23936	1.99834	1.14372	0.995512	0.696542	1.24281	0.754951	0.851065	0.737483	0.435081	0.982227
gene:90956	ADCK2	5.12307	5.18873	6.10633	2.21278	2.88896	2.56124	3.19871	3.09668	3.10461	2.57687	2.81069	3.14828
gene:203054	ADCK5	12.6618	13.3169	14.6463	11.5814	10.4395	10.4923	14.8928	12.9923	11.4563	12.006	11.1689	11.816
gene:107	ADCY1	0.259845	0.295759	0.309651	0.157134	0.134018	0.155799	0.121625	0.127393	0.0881976	0.212064	0.158174	0.125546
gene:55811	ADCY10	0.194459	0.0743777	0.101054	0.460251	0.576968	0.682566	0.264561	0.270267	0.186188	0.629055	0.532924	0.513682
gene:108	ADCY2	0.023051	0.0856043	0.108231	0.018378	0.0161653	0.0293928	0.036876	0.00738823	0.029357	0.028363	0.0681348	0.0475487
gene:109	ADCY3	1.93676	2.63944	2.67291	2.78939	3.22672	3.01451	3.38183	3.11092	2.68135	3.41903	3.67867	3.41289
gene:196883	ADCY4	0.346182	0.322643	0.196919	0.708742	0.549978	0.81607	0.762223	0.434726	0.583361	1.1038	0.701284	0.876865
gene:111	ADCY5	0.549272	0.446959	0.478784	0.231129	0.316679	0.257139	0.245385	0.140102	0.178367	0.262615	0.101452	0.2301
gene:112	ADCY6	31.6654	33.3695	31.7691	24.8692	23.9701	24.4319	21.7452	21.5694	21.8147	24.164	24.8286	23.1719
gene:113	ADCY7	2.02709	2.37613	1.84977	0.608102	0.748422	0.586258	1.01005	1.31089	0.601266	0.756299	0.775179	0.667212
gene:114	ADCY8	0	0	0	0.023882	0	0	0	0	0	0	0	0
gene:115	ADCY9	2.57205	3.05215	2.35087	3.65641	3.12482	3.75981	3.00111	3.44871	2.96143	3.56669	3.15124	3.49968
gene:116	ADCYAP1	0.162177	0.0384326	0.0486152	0	0	0	0	0	0	0	0.016754	0.0598744
gene:117	ADCYAP1R1	0	0	0	0	0	0	0	0	0	0	0	0
gene:118	ADD1	53.0476	58.5817	54.8378	45.5954	42.6212	43.5844	40.5299	42.1812	38.3939	48.8486	45.2827	45.7191
gene:119	ADD2	0	0	0	0.004982	0	0	0	0.00386696	0	0	0	0
gene:120	ADD3	34.8333	33.2371	35.2269	36.3026	40.8335	38.1904	39.0549	38.6099	35.0733	33.9866	35.573	35.299
gene:79747	ADGB	0	0	0.00812469	0	0	0	0.016692	0.00624023	0	0	0	0.0114328
gene:84435	ADGRA1	0.012444	0	0	0	0.0133271	0	0	0	0	0	0	0.0129454
gene:25960	ADGRA2	0.016294	0.0491229	0.0302482	0.443458	0.424609	0.391739	0.429178	0.426107	0.544097	0.380479	0.366593	0.359095
gene:166647	ADGRA3	15.5896	16.7889	15.635	11.9524	11.3485	10.2125	11.4608	10.8742	10.0677	11.8343	11.9557	11.336
gene:575	ADGRB1	0	0	0	0.006353	0.00778087	0	0	0	0.00899076	0	0.00896488	0
gene:576	ADGRB2	0.231274	0.169932	0.294992	2.01465	2.16607	2.93353	2.76971	2.38604	2.0946	2.3761	2.2027	2.23082
gene:577	ADGRB3	0	0	0	0	0	0	0	0	0	0	0	0
gene:283383	ADGRD1	0.019558	0.0122919	0.039471	0	0	0	0.010267	0.0284663	0.00980661	0.019819	0	0.00870644
gene:347088	ADGRD2	0.018317	0	0.0129229	0.022478	0.089618	0.0784067	0	0.0483231	0.0286397	0.178527	0.297353	0.0487525
gene:30817	ADGRE2	0.080391	0.241436	0.231397	0.177712	0.190184	0.218141	0.082295	0.26269	0.131103	0.262062	0.100433	0.0943824
gene:976	ADGRE5	33.8174	37.4373	33.9064	31.4015	31.7512	31.3798	29.0676	30.3863	30.3349	33.7774	29.4685	31.9604
gene:266977	ADGRF1	0.885482	1.13392	1.23107	0.768276	0.894452	0.824472	0.842406	1.0507	0.957758	0.897524	0.84758	0.749211
gene:165082	ADGRF3	0.521292	0.570197	0.642696	0.425697	0.404386	0.622093	0.593977	0.951881	0.441342	0.488538	0.515363	0.57518
gene:221393	ADGRF4	2.77596	3.85775	3.72431	2.68576	2.77861	2.64921	2.22453	2.74903	2.69657	2.43258	2.43052	2.53949
gene:221395	ADGRF5	0.111432	0.0902244	0.10214	0.202065	0.366478	0.3741	0.115352	0.414045	0.229723	0.380107	0.391699	0.289736
gene:9289	ADGRG1	46.8301	49.0555	48.551	56.0033	51.4625	53.1073	57.7568	54.8808	54.866	56.1886	50.8676	57.5685
gene:10149	ADGRG2	0.064815	0.0207696	0	0	0	0	0	0.0295242	0	0	0.0244716	0
gene:222487	ADGRG3	0	0	0.0272331	0.033724	0.0814599	0.0877561	0	0.0191446	0.0274894	0	0.0650314	0
gene:139378	ADGRG4	0.081556	0.07839	0.0689254	0.032562	0.0302826	0.0274283	0.058083	0.0237644	0.0405952	0.019728	0.0299864	0.0436166
gene:221188	ADGRG5	2.35046	2.8498	2.29061	3.49282	3.15263	2.90148	3.34047	4.12309	3.49619	4.01651	3.09477	3.42796
gene:57211	ADGRG6	16.669	19.1707	17.1666	13.0398	13.3238	12.2183	10.9717	14.4504	16.0414	10.66	12.9675	9.85249
gene:84873	ADGRG7	29.5956	29.7832	29.2765	21.256	20.6557	19.0984	19.1802	17.0621	17.89	19.584	18.9137	17.4876
gene:22859	ADGRL1	6.20536	6.13854	5.55365	14.5743	15.2351	14.4153	13.537	13.6282	11.8479	15.028	13.1608	14.9371
gene:23266	ADGRL2	0.157183	0.122576	0.235261	0.221743	0.171915	0.150808	0.085331	0.155604	0.142538	0.190784	0.196273	0.202381
gene:23284	ADGRL3	0.075676	0.0521808	0.0858245	0.032638	0.0141332	0.0151912	0.03695	0.0371155	0.070333	0.024394	0.0341247	0.0179532
gene:64123	ADGRL4	0	0	0	0.004265	0	0	0	0	0	0	0	0
gene:84059	ADGRV1	1.90603	1.96271	0.964566	0.912889	0.731504	1.07846	0.744632	1.12984	2.04866	1.75454	1.84022	2.13953
gene:124	ADH1A	0	0	0	0	0	0.00698918	0	0	0.009969	0.060459	0.129291	0
gene:125	ADH1B	0.021695	0.00319277	0.00945647	0.017614	0.000263068	0.0020795	0.003206	0	0	0.022802	0.0031544	0.00313059
gene:126	ADH1C	10.1137	9.00526	10.8413	4.7062	5.00837	4.51525	2.31236	1.07078	0.864732	5.09395	4.02218	4.46799
gene:127	ADH4	0	0	0	0	0.0393818	0	0.037304	0.062745	0	0.027367	0.0419588	0
gene:128	ADH5	31.6978	33.5275	30.1273	28.0641	28.6926	24.8865	29.2605	27.1089	27.2736	24.8967	28.203	26.3212
gene:130	ADH6	1.06154	1.07933	1.04501	0.690703	0.684337	0.458961	0.370914	0.440637	0.641269	0.703079	0.709696	0.684846
gene:137872	ADHFE1	3.57788	3.91059	4.16294	3.83721	4.17825	3.98017	4.23901	3.49032	2.97997	3.70563	3.81996	3.78568
gene:55256	ADI1	34.5318	32.8696	33.4975	20.5629	21.1457	20.8327	19.6529	18.1802	18.4828	20.394	21.6756	19.773
gene:51094	ADIPOR1	30.9799	35.133	32.9399	55.3894	55.068	55.3011	59.3544	59.6994	55.3482	54.5616	54.5387	54.9091
gene:79602	ADIPOR2	38.9868	39.7575	38.3417	62.6542	63.1361	64.9416	57.0704	61.587	61.69	61.4265	60.1795	57.4852
gene:10974	ADIRF	0.027921	0	0.0119992	0.285441	0	0.28542	0	0.0749263	0	0	0.398609	0.275004
gene:132	ADK	10.7592	13.5751	9.85779	10.9694	12.2425	12.4996	9.79518	11.8516	12.1036	12.1163	15.0346	11.7001
gene:133	ADM	2.6512	2.84056	2.89753	9.13673	11.3737	8.96996	8.77937	9.17437	8.77078	9.92359	8.81674	8.84825
gene:79924	ADM2	3.66508	4.06077	2.94734	2.70013	2.44056	2.76186	1.9057	1.77152	1.81916	2.85799	2.65891	2.82044
gene:199800	ADM5	0	0.186574	0	0.908436	0.414177	0.640299	0.486979	0.241166	0.496309	0.727738	0.901571	0.717265
gene:23394	ADNP	12.4151	14.2631	13.3492	3.93272	2.96289	3.33515	3.72121	4.03694	4.12505	3.87459	3.60855	3.93976
gene:22850	ADNP2	5.06716	5.61864	4.50532	8.4292	8.46387	8.22814	8.83786	8.3324	7.72959	9.15163	8.41274	8.25755
gene:84890	ADO	5.5395	5.57612	5.4314	11.9346	10.8703	10.3253	9.49268	8.59833	9.77695	11.2656	12.4685	11.0746
gene:134	ADORA1	0.015575	0.0546236	0	0.025412	0.015123	0	0.016662	0.06828	0.0411143	0	0.0399822	0.0163661
gene:135	ADORA2A	0.684556	0.596685	0.588036	1.21855	1.11447	0.818929	0.537719	0.719596	0.618699	1.59657	1.18972	4.8559
gene:136	ADORA2B	23.6444	24.3021	25.2412	25.9053	26.0891	24.9718	18.9045	16.8433	17.7355	24.4605	22.9508	23.7363
gene:140	ADORA3	0	0	0	0	0	0	0	0	0	0	0	0
gene:83440	ADPGK	8.95027	10.2949	9.84415	11.5022	11.5398	10.9658	11.1758	12.7049	12.3756	9.66611	10.1183	11.5063
gene:141	ADPRH	0.18103	0.0328727	0.0719687	0.021058	0	0.0782439	0.033382	0.0271678	0.0245682	0.011811	0.0216618	0.00928052
gene:113622	ADPRHL1	0.806313	0.567957	0.584286	0.710085	0.867647	0.791664	0.579956	0.107431	0.816641	0.789033	0.752992	0.990179
gene:56985	ADPRM	5.38198	5.16048	4.29587	6.23853	5.92929	4.84298	4.66531	5.42398	5.06502	5.90817	6.25274	5.67704
gene:54936	ADPRS	10.1763	10.472	9.84023	8.6735	8.6913	9.41605	8.47	7.77169	7.93831	9.64879	7.73444	9.14852
gene:148	ADRA1A	0	0	0	0.011156	0	0.0230685	0	0	0	0	0.0133822	0
gene:147	ADRA1B	0	0.0215279	0	0.01825	0.0162447	0	0	0.0204689	0.0370254	0.062139	0	0.0970452
gene:146	ADRA1D	0.075697	0.0740105	0.0444647	0.241144	0.0430092	0.063547	0.084008	0.11041	0.0566096	0.108262	0.0666898	0.0795379
gene:150	ADRA2A	0.188231	0.143067	0.26212	0.056479	0.0501021	0.0572997	0.022488	0.0276492	0.027589	0.040443	0.0433549	0.0117387
gene:151	ADRA2B	0.014357	0.015106	0	0.128264	0.0397184	0.020716	0.113194	0.0827959	0.0151599	0.041952	0.061781	0.0349996
gene:152	ADRA2C	0.280923	0.324853	0.250624	0.072951	0.0774662	0.025768	0.287364	0.181753	0.280326	0.025578	0	0.194538
gene:153	ADRB1	1.13565	2.05349	1.64367	1.81854	1.57713	1.46275	1.46657	1.82731	1.91057	2.13747	2.09683	2.15548
gene:154	ADRB2	0.52905	0.349553	0.503091	2.79245	2.21545	2.47704	1.72808	2.37978	2.53626	1.74809	2.23293	2.24077
gene:155	ADRB3	0	0.0343789	0	0	0	0	0	0	0	0	0	0
gene:11047	ADRM1	86.2807	95.6329	94.0393	119.992	110.634	114.826	113.696	114.576	108.711	115.761	103.422	117.999
gene:158	ADSL	5.27089	5.06094	4.39694	5.63453	4.73292	3.89327	6.50954	4.51571	5.79503	4.91936	5.03342	5.49664
gene:122622	ADSS1	0.524673	0.755393	0.924892	5.66256	7.04241	7.47261	2.71514	3.26502	2.53146	6.9859	6.49161	4.59021
gene:159	ADSS2	14.6514	12.3893	13.8723	12.259	12.5478	12.8567	12.1537	13.1959	12.0197	10.315	10.98	11.0606
gene:84830	ADTRP	1.74291	2.11722	1.85695	2.35512	1.53785	2.75694	1.44421	2.12798	2.05251	1.86973	2.16137	2.41093
gene:165	AEBP1	0.009627	0	0	0.006448	0.0184009	0.0175992	0.027711	0	0	0.048588	0.00747971	0
gene:121536	AEBP2	4.67176	3.79214	4.72765	6.072	5.79762	4.53961	4.41718	4.96661	4.8649	5.45638	4.91926	6.15353
gene:64782	AEN	6.32555	6.01764	5.93548	9.22364	9.45219	8.93673	6.96464	6.42864	5.89346	9.22044	9.21493	8.38082
gene:60312	AFAP1	12.1774	12.7204	12.1886	25.1353	25.866	25.5469	27.0134	27.2175	24.5346	27.3195	25.9718	25.3576
gene:134265	AFAP1L1	0.069324	0.0232934	0.0347745	0.050741	0.0323594	0.0663528	0.008795	0.0349264	0.0464753	0.035198	0.00893355	0.0228318
gene:84632	AFAP1L2	0.159835	0.151661	0.221979	0.035459	0.0757319	0.163728	0.105989	0.163242	0.243527	0.243654	0.0868713	0.0838921
gene:4301	AFDN	61.8429	66.0228	56.5416	76.935	69.0921	61.1102	61.7605	63.3874	65.0944	66.4774	60.8077	55.7803
gene:4299	AFF1	12.5848	12.0991	11.4875	13.8643	13.9356	13.2575	13.2028	13.3656	13.1279	12.1236	12.816	11.9072
gene:2334	AFF2	0.009186	0.00804106	0	0.003098	0.00676532	0	0.003262	0	0	0	0	0
gene:3899	AFF3	0.015791	0.0101831	0.0132181	0.00498	0.0109496	0	0.015164	0.0766825	0	0	0.0268692	0
gene:27125	AFF4	14.2086	13.9874	13.0369	14.2738	15.4892	13.9725	13.715	14.5366	13.675	14.2491	13.9568	12.8081
gene:246269	AFG1L	1.03359	1.31898	1.39706	0.572606	0.729185	0.910721	0.333418	0.578519	0.451183	0.496123	0.628719	0.436804
gene:10939	AFG3L2	35.8121	36.1911	35.5114	27.6653	26.5606	25.5192	24.0176	26.1898	26.5219	25.1296	25.4717	25.9152
gene:173	AFM	0.026571	0	0	0	0	0	0	0	0	0	0	0
gene:125061	AFMID	8.71636	8.75768	8.27753	17.4135	19.0151	15.7329	16.0388	13.4152	14.6159	18.0631	18.3062	17.7079
gene:174	AFP	14.4651	17.491	14.579	10.8263	9.90608	9.86162	9.50342	9.0891	8.37363	10.7038	10.2788	7.83041
gene:54812	AFTPH	14.2384	14.089	12.6353	21.8971	23.8798	21.0207	21.7256	20.693	20.5626	21.9098	21.5157	20.7101
gene:175	AGA	12.8436	10.8525	11.4666	9.52813	7.94063	8.62246	9.68904	7.56567	9.26465	8.76439	9.36096	8.61008
gene:116987	AGAP1	18.2537	19.3073	16.989	14.4376	13.6653	13.8903	12.2804	12.8544	12.2776	14.9392	14.993	13.4833
gene:116986	AGAP2	0.050026	0	0	0.06369	0.0780529	0.0622981	0	0.0669497	0	0.049833	0.0148018	0.0461096
gene:116988	AGAP3	32.5952	38.5277	33.9891	46.1346	44.0048	44.0164	38.8844	38.1851	33.8352	44.7765	43.0782	44.2138
gene:119016	AGAP4	2.67231	3.52165	2.30502	4.52432	4.98701	4.30484	5.40555	4.71208	4.26274	4.89884	5.04298	5.34739
gene:729092	AGAP5	2.07375	1.85772	2.22388	1.22048	1.45493	1.2201	2.06576	1.53561	1.7296	1.31388	0.649408	1.28343
gene:414189	AGAP6	3.24646	3.18812	3.35542	6.53588	6.28415	6.74814	7.21094	6.15472	6.99305	6.86953	7.12283	6.76739
gene:642517	AGAP9	5.31752	5.73859	5.66158	2.57421	2.92537	3.09524	4.85617	4.69427	4.05472	3.1208	3.31677	3.0467
gene:123624	AGBL1	0	0	0.00446682	0	0	0	0	0	0	0	0	0
gene:79841	AGBL2	0.631944	0.613279	0.585595	0.372098	0.458723	0.36202	0.226678	0.392124	0.487182	0.317089	0.250924	0.573625
gene:340351	AGBL3	0.598798	0.759412	0.653455	1.0111	0.715738	0.903609	1.34144	1.09235	1.71332	0.852644	0.825212	0.612643
gene:84871	AGBL4	0.09522	0.0471323	0	0.026493	0.0536769	0.00876645	0	0.0489868	0	0.02441	0.0988995	0.0822355
gene:60509	AGBL5	8.25873	8.28228	6.66331	5.67579	6.6509	5.92429	6.52469	5.49978	5.61376	6.7933	5.89739	6.09083
gene:177	AGER	1.69408	1.13812	1.48882	0.660585	0.417267	0.544973	0.938928	0.607647	0.461156	0.399575	0.250498	0.57267
gene:3267	AGFG1	9.3809	8.82895	8.22519	14.7616	10.7631	12.9217	11.499	10.9145	10.4832	13.6245	11.9625	10.5656
gene:3268	AGFG2	8.45651	7.60856	9.10394	8.80349	10.3134	9.5613	8.12729	8.12139	8.33158	10.218	10.1671	9.70833
gene:55109	AGGF1	6.99901	6.37532	7.01475	7.04463	6.56654	6.58163	7.11597	8.56756	7.56809	5.35364	6.21502	6.44148
gene:55750	AGK	2.87993	2.42323	2.43615	1.08875	1.28476	1.17624	2.11787	1.20501	1.25628	1.6878	1.16236	1.73939
gene:178	AGL	5.65392	5.27041	5.80999	4.54821	4.7136	4.56654	4.74324	4.65411	4.65774	3.81691	3.84882	3.46606
gene:79814	AGMAT	10.0344	8.76808	9.42732	4.05804	4.02084	3.70054	4.20862	3.88107	3.56605	4.17799	3.97414	4.15213
gene:392636	AGMO	0.250886	0.121763	0.243659	0.167427	0.184218	0.195265	0	0.119722	0.0438257	0.234483	0.198481	0.0601277
gene:26523	AGO1	3.93481	3.57644	4.06066	4.21353	4.20564	3.79128	3.78708	3.99077	3.41293	3.9076	4.07477	4.10271
gene:27161	AGO2	4.56069	4.39532	4.5472	7.03323	6.44984	6.24375	6.3557	6.93724	5.96851	6.64591	6.21576	6.24521
gene:192669	AGO3	1.05021	0.889479	0.909362	1.41238	1.30024	1.26746	1.39413	1.54741	1.09488	1.32978	1.36965	1.24518
gene:192670	AGO4	4.69769	4.38663	4.2682	1.54502	1.58822	1.61183	1.39598	1.41995	1.46354	1.34764	1.891	1.20737
gene:10554	AGPAT1	30.8274	34.6673	33.5534	36.7952	38.4555	36.631	41.9464	41.7228	40.8187	38.0308	35.8119	38.8988
gene:10555	AGPAT2	200.138	229.879	213.015	275.43	281.922	274.34	290.221	274.294	276.56	287.372	268.556	299.733
gene:56894	AGPAT3	31.5659	32.5873	32.373	28.6125	27.0016	26.4314	28.3075	29.8628	29.1747	29.0033	27.1147	26.6663
gene:56895	AGPAT4	0.075331	0.0561381	0.0565414	0.351573	0.250013	0.204989	0.309871	0.54903	0.195927	0.380397	0.313344	0.285926
gene:55326	AGPAT5	3.53643	2.91459	3.11564	8.47405	8.75429	8.18292	8.65961	7.89164	8.0167	8.30083	8.54259	7.57361
gene:8540	AGPS	11.5505	11.7735	10.4625	9.59587	11.9118	9.43499	9.62043	9.37149	10.1568	8.86438	8.82294	8.65489
gene:10551	AGR2	506.454	568.137	512.448	438.039	445.955	425.213	353.46	377.385	403.009	418.77	451.279	407.999
gene:155465	AGR3	34.2385	37.2892	34.2769	35.8341	36.535	32.8945	34.2935	34.0127	36.4062	38.5028	31.0629	31.2675
gene:375790	AGRN	79.5697	98.6064	90.1161	91.6259	88.3382	95.2313	99.1136	100.611	90.9966	97.3668	89.3554	102.899
gene:181	AGRP	0	0	0.0317059	0	0	0	0	0	0	0	0	0
gene:183	AGT	2.68248	2.80077	3.61758	2.2769	2.05172	2.3958	1.43167	1.40988	1.32899	2.55909	2.29901	2.38964
gene:23287	AGTPBP1	2.41881	2.41249	2.2411	4.43063	4.03141	3.80016	5.14471	5.30357	5.40557	4.26005	3.62309	4.2753
gene:185	AGTR1	0.060059	0.037887	0.0511337	0.022716	0	0	0.110452	0.0561234	0.0448117	0.041186	0.0475265	0.0281306
gene:186	AGTR2	0	0	0	0	0	0	0	0	0	0	0	0
gene:57085	AGTRAP	4.42387	4.39211	4.27809	4.35365	5.47527	3.73326	5.12953	5.12097	3.71022	4.4718	3.0902	4.62471
gene:189	AGXT	0.079295	0.0422259	0	0	0.0684037	0	0.017487	0	0	0.028113	0.0585081	0
gene:64902	AGXT2	0.085986	0.114102	0.116168	0	0.0347429	0.0648222	0	0	0.0677134	0	0.120374	0.0518126
gene:25909	AHCTF1	5.74814	5.2015	5.50204	7.80656	8.37206	8.12411	7.09305	7.05822	7.5367	8.43717	8.59033	7.20916
gene:191	AHCY	43.1813	45.2485	44.678	53.2321	53.5534	50.9603	50.5658	43.1267	39.2443	51.938	50.0118	52.4408
gene:10768	AHCYL1	28.3414	30.5057	28.5172	28.8853	26.9478	26.6872	31.1753	29.9097	29.4045	26.3103	26.1498	26.068
gene:23382	AHCYL2	10.7068	11.4706	9.55532	15.8271	12.9412	15.1303	10.7889	14.9187	15.7244	12.5588	15.6564	13.602
gene:27245	AHDC1	7.00088	7.83025	7.55441	13.3417	14.2159	14.0716	11.2607	12.6954	12.2063	15.2377	12.6795	13.2424
gene:54806	AHI1	2.34175	2.27121	2.05637	4.02717	3.701	3.96983	4.43986	4.97694	4.67805	4.37869	4.57402	3.45124
gene:79026	AHNAK	87.7768	101.536	87.6089	64.91	60.9137	57.6483	57.5215	58.5603	59.0736	64.6608	59.4273	58.6016
gene:113146	AHNAK2	0.168832	0.29964	0.19057	2.06355	1.87935	1.80693	2.23503	1.82299	1.7146	1.93566	1.74576	2.98467
gene:196	AHR	11.7074	10.9115	10.729	18.0074	19.1032	18.0131	16.1211	17.958	18.2834	16.6134	17.4526	14.9925
gene:57491	AHRR	0.105307	0.0715418	0.189051	0.221177	0.0600888	0.225995	0.157577	0.153284	0.209492	0.071504	0.0259186	0.423057
gene:10598	AHSA1	28.8848	29.8503	32.5551	51.1152	55.5421	49.1172	47.1096	46.7808	47.3965	49.5526	55.153	54.4244
gene:197	AHSG	0	0	0	0	0	0.0347119	0	0	0	0	0	0
gene:57379	AICDA	0	0	0	0	0	0	0	0	0	0	0	0
gene:64853	AIDA	7.17711	5.72433	6.79472	9.62893	10.8721	9.95533	11.5524	10.6224	11.9056	9.25287	9.99593	9.51801
gene:199	AIF1	0.237096	0.30032	0	0	0.173918	0	0	0	0.220464	0.224454	0.1106	0.262788
gene:83543	AIF1L	0.044584	0	0.0437182	0	0.0374828	0	0.057331	0.0411201	0	0.015587	0.02977	0
gene:9131	AIFM1	24.5377	23.2461	27.1748	22.308	23.7065	21.4775	21.0699	23.747	24.4395	22.8225	22.6766	22.9806
gene:84883	AIFM2	7.70085	7.72973	7.92187	4.83772	4.12929	4.27654	5.1169	6.18815	6.21767	4.00307	3.97458	4.74706
gene:150209	AIFM3	3.13048	3.87656	3.65185	2.7419	3.78023	2.584	3.28234	3.83144	3.51221	2.82675	3.268	2.94158
gene:51390	AIG1	35.254	31.5475	34.2495	28.5954	32.001	30.0381	26.8111	26.6109	27.6481	27.5241	30.9772	27.3638
gene:9447	AIM2	0	0	0	0	0.0294388	0	0	0	0	0	0	0
gene:9255	AIMP1	15.2874	15.8092	15.7605	9.41141	10.4722	9.46076	11.5877	10.9624	10.2781	10.8896	11.4676	10.8757
gene:7965	AIMP2	9.41162	8.80241	9.79609	7.60665	7.5241	7.29051	9.01012	9.26714	7.26131	7.96448	7.37527	8.21784
gene:9049	AIP	20.0824	20.5033	18.2614	14.5209	12.2866	13.6273	11.212	11.0895	9.69994	10.9802	12.0487	10.5641
gene:326	AIRE	0	0.0329329	0	0.022109	0.0480591	0.0472152	0.166897	0.100781	0.135478	0.072908	0.0476479	0.0428807
gene:389813	AJM1	2.14776	3.37064	3.01839	2.67754	2.16183	2.48969	1.51262	1.5455	1.60959	3.42756	2.50066	1.91373
gene:84962	AJUBA	22.1651	28.4183	25.7328	8.96007	7.87563	7.81254	8.19585	10.8721	8.94438	7.71073	7.107	8.94594
gene:203	AK1	5.12629	6.8523	8.06123	9.70604	6.62714	9.66892	11.1774	16.5981	13.4327	7.06289	8.47839	10.7335
gene:204	AK2	49.8296	63.9885	54.4428	59.0498	52.1705	59.9993	52.6127	51.0491	58.805	57.037	60.8911	48.6522
gene:50808	AK3	20.8682	18.3601	19.2526	15.3614	16.0456	13.0766	15.9661	14.9191	16.4381	12.6118	12.9389	13.1495
gene:205	AK4	13.9376	10.8601	12.7397	6.68667	6.78752	7.07824	6.99873	7.17795	10.255	6.5221	6.97706	7.26326
gene:26289	AK5	0.171215	0.0721683	0.105542	0.041384	0.110448	0.0363732	0	0.0322293	0	0	0.296164	0.0861517
gene:102157402	AK6	11.6429	8.5194	8.6977	9.88127	10.0919	9.57839	6.7273	7.59361	8.78777	8.10477	10.2399	8.6747
gene:122481	AK7	1.02942	1.41783	1.35027	1.19948	0.881955	1.22716	1.45602	1.83748	1.91342	1.0045	1.137	1.07321
gene:158067	AK8	0.076774	0	0	0.031933	0.118776	0.108152	0.040528	0.0448969	0.0349394	0.134189	0.0214963	0
gene:221264	AK9	2.37913	1.77426	2.13785	1.64797	1.72507	1.87666	1.73374	1.85154	1.56102	1.48159	1.56851	1.34658
gene:642597	AKAIN1	0	0.0159691	0.0431289	0.103228	0.0184783	0	0	0	0	0.016326	0.203294	0.0224971
gene:8165	AKAP1	61.6426	58.0137	58.4654	15.7123	17.067	14.8428	13.8213	14.7179	14.6242	16.0025	15.8465	15.239
gene:11216	AKAP10	5.99188	5.8668	5.03476	2.5547	2.48345	2.95227	3.52852	3.40794	3.51197	3.09569	3.06157	3.37913
gene:11215	AKAP11	4.11388	3.38283	3.86497	4.5434	4.68679	4.31288	4.98225	5.64318	5.21447	4.35931	3.88391	3.78039
gene:9590	AKAP12	0.346767	0.565054	0.460294	0.317603	0.293662	0.324834	0.401153	0.607811	0.457257	0.429709	0.328602	0.433374
gene:11214	AKAP13	11.7739	14.1282	11.3847	20.5594	21.3125	19.3502	21.9859	21.4507	21.3923	21.2519	20.4321	21.4854
gene:158798	AKAP14	0	0	0	0.128134	0	0	0	0	0.135996	0	0.0509247	0.195786
gene:8227	AKAP17A	25.4339	28.6722	26.9092	39.5945	38.2939	42.3877	40.1686	37.0249	34.571	44.3707	35.9546	41.1827
gene:10566	AKAP3	0.202226	0.0638026	0.154631	0.188358	0.0215329	0	0.033258	0.0320143	0.0448156	0.05193	0.264337	0.0926065
gene:8852	AKAP4	0	0.0570125	0	0.026174	0.0146723	0	0	0	0	0	0	0.0271076
gene:9495	AKAP5	0.423249	0.265961	0.288969	0.99039	1.36452	1.17289	0.916103	0.882522	0.952074	1.34956	1.0813	0.905521
gene:9472	AKAP6	0.069704	0.140851	0.0296931	0.060835	0.0710056	0.0339827	0.055467	0.0560144	0.0281951	0.066501	0.0892014	0.0383834
gene:9465	AKAP7	1.02073	2.63534	2.21336	1.29548	1.56748	1.57205	1.17433	1.33206	1.3837	1.26136	1.8639	0.890329
gene:10270	AKAP8	14.6979	13.1642	12.9481	6.28501	6.55579	6.01453	5.35473	5.49651	5.28947	6.53921	6.03975	6.24531
gene:26993	AKAP8L	26.7968	23.0138	25.5233	19.4807	23.4391	28.3494	25.7902	27.6893	23.6554	24.9799	25.2671	21.3744
gene:10142	AKAP9	12.6951	10.8054	11.6304	6.23241	6.69535	6.75229	5.85235	6.95698	6.93461	7.15217	5.77074	6.09269
gene:56672	AKIP1	9.40686	9.52943	9.26601	6.35317	4.70576	5.40072	7.3471	6.07308	6.99087	5.68429	5.77222	5.74499
gene:79647	AKIRIN1	27.4138	27.0371	26.3303	58.8824	59.9367	62.5645	54.0694	54.7195	55.1366	58.7081	59.5366	55.2438
gene:55122	AKIRIN2	24.0331	22.5527	21.8266	26.0615	24.711	25.9469	26.9896	24.5465	23.6416	25.5182	24.805	25.4693
gene:80709	AKNA	6.16481	5.87929	6.07411	12.2673	13.3722	12.6001	11.3555	12.4338	10.923	12.3595	11.2768	13.3316
gene:254268	AKNAD1	0	0	0	0	0	0	0	0	0	0	0	0
gene:10327	AKR1A1	114.495	115.879	117.329	99.3185	94.7776	96.8342	109.226	100.501	104.189	101.306	98.3095	109.668
gene:231	AKR1B1	2.15403	2.67367	2.02459	4.8806	4.93973	5.10949	8.58098	7.16645	7.78027	4.8363	5.11557	5.48884
gene:57016	AKR1B10	6.64007	10.2675	7.68142	3.97419	4.1081	4.30231	6.13642	15.5874	15.0357	4.9768	5.01495	4.70148
gene:441282	AKR1B15	0.14605	0.225113	0.230755	0.052008	0.138169	0.294615	0.221161	0.41822	0.413238	0.137223	0	0.19328
gene:1645	AKR1C1	29.0949	31.7684	23.3679	20.6591	17.4401	15.5713	25.7467	28.9398	26.1576	19.1358	17.0717	19.4844
gene:1646	AKR1C2	30.3861	25.9784	28.0844	16.104	14.2432	17.2437	22.638	26.7503	24.4847	16.4722	16.2427	18.9748
gene:8644	AKR1C3	47.2257	45.6388	51.9901	26.1759	22.1304	25.2459	28.7144	27.229	26.8393	27.7196	23.9961	25.7904
gene:1109	AKR1C4	0.057617	0.258884	0.0594679	0.162161	0.105695	0.00920029	0.073305	0.0362914	0.0697405	0.145174	0.0952791	0.0967422
gene:340811	AKR1C8	0	0	0	0	0	0	0	0	0	0	0	0
gene:6718	AKR1D1	0.150651	0	0	0.012129	0	0.0467365	0.101635	0.0381109	0	0.054676	0.0441949	0.068417
gene:83592	AKR1E2	0.30091	0.323768	0.466277	0.072302	0.331007	0.266809	0.525611	0.817598	0.517404	0.335747	0.333912	0.237408
gene:8574	AKR7A2	33.842	42.6254	42.9283	30.9453	32.4985	32.3207	40.9783	43.2534	37.6699	31.9748	31.4367	35.3755
gene:22977	AKR7A3	0.889117	1.27154	1.35464	1.29364	1.72154	1.74002	2.23688	1.61514	1.47439	1.32613	1.66097	1.55739
gene:246181	AKR7L	1.97496	1.62104	1.72359	0.597625	0.510587	0.910479	0.935581	1.03497	0.469792	0.823997	0.69329	1.13674
gene:207	AKT1	34.0865	37.9736	36.9409	31.1111	29.5261	31.2842	35.1791	32.5758	30.6708	33.4697	31.9134	34.2923
gene:84335	AKT1S1	19.6176	19.8787	18.8293	7.40833	7.09602	7.47734	7.27555	6.29672	5.77803	6.81156	6.61845	7.90279
gene:208	AKT2	28.0037	26.9791	32.9183	22.7176	19.2558	17.666	16.8243	16.8951	17.0302	19.1742	17.8992	22.2437
gene:10000	AKT3	0.183683	0.425672	0.283495	0.126611	0.328422	0.157102	0.268858	0.210896	0.130088	0.084914	0.226197	0.0735499
gene:64400	AKTIP	9.55218	7.08185	6.43428	12.9019	12.2449	13.0987	10.8877	10.5974	10.2168	10.7871	12.8018	11.5759
gene:210	ALAD	27.0426	21.7597	19.3889	65.2609	61.8566	65.3843	70.8933	57.9614	59.1823	61.3412	57.0058	71.9875
gene:211	ALAS1	27.2304	28.0441	28.1997	73.7637	68.5139	72.0082	80.5571	76.6623	70.4101	70.1651	64.1186	71.7101
gene:212	ALAS2	0	0.0623566	0.017698	0.005999	0.0169893	0.0500044	0.064569	0.0199271	0.031385	0.166251	0.0404541	0.106057
gene:213	ALB	0.479742	0.487027	0.401441	0.062625	0.116067	0.313175	0.119144	0.112064	0.230147	0.066454	0.067707	0.17937
gene:214	ALCAM	16.0392	13.2931	14.6808	13.0378	13.2543	13.7517	13.2334	13.3808	13.7312	13.7601	13.7566	11.8148
gene:126133	ALDH16A1	8.38915	9.15964	7.54316	5.22489	6.66132	4.94848	6.00364	5.82096	4.61088	5.37996	4.70508	5.39958
gene:5832	ALDH18A1	150.616	148.568	150.511	56.0138	55.3601	56.0796	56.3725	57.6188	55.2415	57.628	53.2149	56.1312
gene:216	ALDH1A1	647.704	626.849	617.237	526.179	529.73	517.681	566.719	626.493	657.294	515.037	540.574	497.236
gene:8854	ALDH1A2	6.25341	6.35152	5.92124	6.37692	6.20336	6.78336	7.13085	7.71801	8.56157	6.86818	7.25294	6.10154
gene:220	ALDH1A3	1.33716	1.57147	1.35571	2.00226	2.31615	2.24498	2.61776	2.64031	3.02765	2.06486	2.24952	2.12616
gene:219	ALDH1B1	18.6976	18.5815	20.6593	14.3691	15.2601	13.8989	14.0071	12.8702	11.5248	15.509	14.3691	15.5855
gene:10840	ALDH1L1	0.041284	0.0149079	0	0.03277	0.0106558	0.0191396	0	0	0	0.021976	0	0
gene:160428	ALDH1L2	0.041317	0.0645391	0.020693	0.023073	0.0288819	0.0434949	0.046435	0.084566	0.0546995	0.025999	0.0635246	0.0338942
gene:217	ALDH2	35.6299	39.4406	34.1268	32.5721	33.5827	27.1212	35.7166	39.5501	29.1755	28.2483	33.5539	29.68
gene:218	ALDH3A1	0.437189	0.533763	0.525346	0.51691	0.636329	0.61936	0.196375	0.605996	0.529135	0.45694	0.201063	0.499977
gene:224	ALDH3A2	19.6096	20.2409	19.4173	31.9099	32.5177	32.8717	36.1605	35.8022	34.862	35.9728	35.6287	32.592
gene:221	ALDH3B1	10.1176	13.8529	11.2786	6.63528	6.61069	6.37934	5.05757	4.33604	4.97925	5.61444	6.8335	6.10505
gene:222	ALDH3B2	0	0	0	0	0	0.0577297	0	0	0.0345343	0	0	0
gene:8659	ALDH4A1	1.97829	2.75328	2.628	4.8464	5.84623	6.5054	7.27938	8.34784	7.20662	5.69342	4.9154	6.02296
gene:7915	ALDH5A1	4.77038	4.33005	5.54174	2.55257	2.21797	2.47603	2.33749	2.15013	2.40101	2.50202	2.43926	3.21794
gene:4329	ALDH6A1	3.50831	4.66543	4.19233	3.77404	3.65279	3.85075	4.10567	3.95487	4.82372	4.02111	3.24928	4.1521
gene:501	ALDH7A1	7.089	7.40582	7.80388	6.6755	7.10975	6.98575	6.9829	6.23679	8.22165	10.5841	6.87963	7.61127
gene:64577	ALDH8A1	0.098909	0.0182137	0.115926	1.07875	1.05919	0.707457	0.567399	0.545164	0.749862	1.37684	1.19431	1.03035
gene:223	ALDH9A1	20.6259	24.0043	22.1143	18.8258	18.4095	18.8699	19.5812	20.4834	19.12	18.9771	18.6029	19.5362
gene:226	ALDOA	330.563	396.432	384.52	418.637	413.924	398.939	371.436	395.731	351.192	417.645	391.483	417.585
gene:229	ALDOB	45.2216	42.9285	48.5601	27.6759	28.6812	25.7459	30.2043	23.0217	23.6089	30.0012	25.754	29.2992
gene:230	ALDOC	22.7839	30.6797	28.0124	33.7138	34.0419	35.3523	33.3594	35.8833	35.0924	36.2262	32.6727	35.5512
gene:56052	ALG1	6.85571	5.26247	7.18817	3.75226	3.63046	3.29726	4.45516	4.3252	3.65935	3.83844	5.11795	4.50528
gene:84920	ALG10	0.987531	0.555498	1.10404	0.377048	0.923414	0.733483	0.575155	0.524482	0.585597	0.653257	0.353819	0.452875
gene:144245	ALG10B	0.240028	0.329244	0.41456	0.180429	0.239731	0.175355	0.129367	0.288871	0.140834	0.15371	0.137413	0.134739
gene:440138	ALG11	7.32084	6.30353	6.89887	11.5711	10.3159	8.56347	9.83066	10.9968	10.5658	10.1506	11.0591	10.1212
gene:79087	ALG12	6.40104	7.73518	7.57386	4.21793	4.03037	3.93622	4.44638	4.175	3.85137	4.39485	3.80182	4.4193
gene:79868	ALG13	11.0011	8.63439	9.26838	6.48596	8.06262	7.64019	6.43489	5.65693	7.84287	7.79131	9.20472	7.5245
gene:199857	ALG14	1.86696	1.64703	1.74371	1.06339	1.1624	1.41779	0.814526	1.01653	1.20607	1.01958	1.35959	0.818004
gene:644974	ALG1L2	0.084185	0.0717773	0	0	0.0296801	0.147894	0.065374	0.401468	0	0.14279	0.102395	0
gene:85365	ALG2	13.3382	13.9526	12.6345	15.4399	16.3345	16.7967	16.3055	16.6899	15.1561	17.0769	15.7566	15.6326
gene:10195	ALG3	10.3979	11.968	10.201	14.9976	14.3106	14.1461	14.03	12.4788	12.7909	14.0984	13.7019	15.676
gene:29880	ALG5	21.3121	19.923	19.5661	13.9853	16.8041	17.0333	18.3126	20.0899	17.6914	13.7477	15.3831	12.3218
gene:29929	ALG6	1.95609	1.44464	1.60242	1.06305	0.841486	0.598891	0.847167	0.945668	1.15621	0.941972	0.787356	0.732522
gene:79053	ALG8	9.07573	8.37253	10.3069	6.85364	7.41036	6.99217	6.75161	7.99356	7.72307	8.00385	7.5448	6.95657
gene:79796	ALG9	4.57416	5.43582	4.82972	3.90405	4.07993	3.308	3.68415	3.7516	5.80878	3.84816	4.50188	4.08128
gene:238	ALK	0	0	0	0.016736	0	0	0	0	0	0	0	0
gene:389658	ALKAL1	0.154225	0.124068	0.237066	0.092462	0.0403765	0.167745	0.184905	0.0675202	0.115337	0.109097	0.0380271	0.225412
gene:285016	ALKAL2	0	0.0598858	0.140429	0.444986	0.276088	0.470816	0	0.0444997	0.158164	0.918473	0.988114	0.30736
gene:8846	ALKBH1	4.50001	3.91763	4.71715	5.65519	6.8366	5.56906	6.28246	5.15578	5.14811	5.72436	6.23207	5.45013
gene:121642	ALKBH2	1.91844	1.71994	3.02046	2.29846	1.92938	2.68925	2.75221	1.96552	1.94359	3.40194	2.11989	3.02284
gene:221120	ALKBH3	6.99075	8.20553	7.73571	2.50943	2.95078	3.48627	5.14445	3.945	2.87811	3.57727	4.07424	3.7168
gene:54784	ALKBH4	3.03852	3.56095	3.49407	2.28643	2.34846	3.19183	2.29941	2.34705	2.23011	2.88669	2.45617	2.45447
gene:54890	ALKBH5	23.6074	22.825	23.0031	34.2728	37.777	33.5651	31.1858	30.0493	27.2777	34.8643	33.016	36.0231
gene:84964	ALKBH6	4.44937	5.64437	6.05531	4.15835	3.92903	4.54713	5.68868	6.18697	4.81511	3.67954	6.00548	7.00376
gene:84266	ALKBH7	52.3958	51.2082	54.0099	41.9552	42.2454	41.9076	34.5889	31.6333	31.4528	42.4109	42.791	43.4071
gene:91801	ALKBH8	1.32226	1.26712	1.23202	0.925978	0.594715	0.923729	0.950509	0.994292	1.10062	0.832782	0.853386	0.672838
gene:55821	ALLC	0	0	0	0.112889	0	0	0	0	0	0.087651	0.0857807	0
gene:7840	ALMS1	0.664204	0.681665	0.908694	0.356614	0.411587	0.305518	0.445044	0.394298	0.340863	0.4291	0.357605	0.312333
gene:239	ALOX12	0.785679	0.958266	0.811482	0.899293	1.00375	0.875513	1.17895	0.949421	0.934375	0.802049	0.981072	0.756503
gene:242	ALOX12B	0.029693	0	0	0	0.0279944	0	0.072039	0	0.00144803	0.018642	0	0.0326596
gene:246	ALOX15	0	0.0867453	0	0.10811	0.0691939	0.177571	0.073457	0.06577	0.260122	0.20426	0.0803001	0.187754
gene:247	ALOX15B	0.0152	0.0928788	0	0.053317	0.0458106	0	0.037039	0.0806455	0	0.059925	0	0
gene:240	ALOX5	18.6743	27.5552	22.0748	19.7159	18.5859	19.0748	22.5598	21.5259	20.5295	17.4007	18.0672	21.0491
gene:241	ALOX5AP	0	0	0.0356993	0	0.0663895	0.0429675	0.163713	0	0	0	0.0563328	0
gene:59344	ALOXE3	0.027884	0.0649374	0.0914388	0.461055	0.352124	0.182524	0.444448	0.524484	0.541105	0.368845	0.533352	0.535978
gene:251	ALPG	0.33213	0.35316	0.458992	0.34954	0.29272	0.393829	0.514965	0.450865	0.340784	0.276926	0.375667	0.348006
gene:248	ALPI	0.804406	0.706849	1.42017	0.522777	0.818152	0.726321	0.418055	0.498131	0.518525	0.509346	0.677073	1.02295
gene:80216	ALPK1	4.37286	4.02383	4.43203	3.14193	2.73586	2.87873	4.47809	4.66099	3.90948	2.75249	2.56504	3.08318
gene:115701	ALPK2	0.013081	0.0419645	0	0	0.0249607	0	0.014655	0	0	0.010806	0.0150749	0
gene:57538	ALPK3	3.52054	4.05869	3.47015	2.26542	2.03548	2.04863	2.38303	2.30523	2.06009	2.25758	1.95245	2.07829
gene:249	ALPL	0	0	0	0.016029	0	0	0	0.0811081	0	0.043209	0	0
gene:250	ALPP	0.176263	0.136203	0.155768	0.096196	0.0835475	0.0679595	0.05208	0.181716	0.0658063	0.106665	0.150513	0.0803782
gene:57679	ALS2	6.56775	6.51132	6.20264	11.722	12.6251	11.1427	10.9506	12.8339	12.005	11.9162	12.0146	11.47
gene:259173	ALS2CL	17.2708	21.5246	17.1878	13.9127	12.3128	14.3368	11.5609	13.4469	12.4043	13.7645	13.1657	11.9103
gene:8092	ALX1	0.185774	0.337693	0.0970359	0	0.0853245	0	0	0.161806	0	0.088436	0.271591	0.109675
gene:257	ALX3	0.00189	0	0	0	0	0	0	0	0	0	0	0
gene:60529	ALX4	0.009265	0.0103335	0	0.018958	0.0134284	0.0464684	0.019693	0.0325254	0.0104688	0.045188	0.0421556	0.031285
gene:10189	ALYREF	12.8104	20.8095	15.3198	19.5071	16.434	16.8223	15.9613	16.4137	14.672	21.7917	18.6085	19.619
gene:23600	AMACR	35.6165	32.8194	33.8213	9.46614	9.28122	8.7241	10.3217	9.61338	10.0806	8.30525	8.44281	9.15491
gene:258	AMBN	0	0	0	0	0.0255077	0	0	0	0	0	0	0
gene:259	AMBP	0.359352	0.573494	0.396181	0.786648	1.0536	1.18076	0.765203	0.562358	0.442056	0.983554	1.16622	0.782543
gene:55626	AMBRA1	8.23668	8.48298	8.38245	13.3915	13.3192	12.5663	12.0457	12.5314	12.492	12.7966	11.858	13.5769
gene:262	AMD1	16.4871	15.1463	18.6807	30.915	35.8909	31.2183	35.1504	29.0641	29.5138	31.8642	35.8517	29.3139
gene:144193	AMDHD1	0.633924	0.842751	1.29026	0.84119	0.692478	0.722754	0.485823	0.722017	0.652765	0.619471	0.528635	0.346695
gene:51005	AMDHD2	16.5481	16.7188	13.6092	20.2262	19.8078	20.2358	24.2012	21.1375	19.4461	22.0399	20.3616	22.5204
gene:266	AMELY	0	0.0371806	0	0	0.0630034	0.0218752	0	0	0	0.054434	0	0
gene:139285	AMER1	0.609992	0.596602	0.599316	0.620303	0.585001	0.590215	0.583844	0.501925	0.493167	0.82556	0.379431	0.686606
gene:219287	AMER2	0	0	0	0	0.00535567	0	0	0	0	0	0	0
gene:205147	AMER3	0.158694	0.144696	0.304873	0.016759	0.00703931	0.00896923	0.025449	0.0549813	0.0249984	0.020919	0.0180365	0.0231129
gene:267	AMFR	16.1428	16.9625	17.8758	17.5333	19.0188	16.5206	20.2798	21.6412	19.019	19.1984	18.1534	19.5241
gene:268	AMH	2.66069	2.0316	2.6951	4.43289	4.57754	4.82965	4.21302	3.77407	4.48208	5.31801	5.79199	5.34461
gene:269	AMHR2	0	0	0.0249181	0	0	0	0	0.020571	0	0	0	0.0743077
gene:57463	AMIGO1	1.42082	1.36067	1.40787	0.426266	0.424866	0.394792	0.547002	0.367812	0.542683	0.283984	0.383156	0.605339
gene:347902	AMIGO2	2.08498	2.38847	1.82848	1.77904	1.7316	1.78229	2.18408	2.23639	1.72636	1.87533	1.82145	2.2315
gene:386724	AMIGO3	0.601258	0.464642	0.815562	1.39559	1.05654	1.29605	1.05692	0.593033	1.05808	1.16412	1.20621	1.7495
gene:9949	AMMECR1	4.47304	3.94365	3.47229	2.80646	2.33159	2.57037	2.48093	2.81463	2.72374	3.09471	3.52033	2.45834
gene:83607	AMMECR1L	3.58739	3.92615	3.97924	5.27377	5.11328	5.25486	5.15063	4.61627	4.53164	5.21045	4.98389	4.42969
gene:81693	AMN	75.4662	76.8161	80.7599	70.3102	69.7017	70.107	61.5511	50.9183	53.4806	65.954	65.3508	75.4001
gene:196394	AMN1	1.90961	2.35767	1.79543	3.34292	3.8427	4.17097	3.43611	3.64999	3.39795	3.45932	4.09191	3.2458
gene:154796	AMOT	3.84418	3.90937	3.54601	4.97725	4.38735	4.71181	4.75303	5.24183	5.00721	4.31749	4.36544	4.48757
gene:154810	AMOTL1	8.12836	9.73721	8.25793	9.36162	9.14821	8.38284	9.48221	9.18518	9.11662	9.05485	8.88301	8.51159
gene:51421	AMOTL2	10.0261	13.0558	12.5036	7.5652	6.92849	5.73854	9.50985	9.46909	6.64199	6.31709	5.70432	8.91652
gene:270	AMPD1	0	0	0	0	0	0	0	0	0	0	0	0
gene:271	AMPD2	13.0995	12.0512	12.5616	15.2486	15.6997	16.156	16.0865	14.5558	13.8417	17.5267	14.8685	17.5172
gene:272	AMPD3	1.42409	1.89536	1.33131	0.220751	0.396176	0.318754	0.479592	0.571647	0.389666	0.24259	0.453956	0.277411
gene:273	AMPH	0.016459	0.0576981	0.0496004	0	0	0.0518782	0.014555	0.0113008	0	0	0.0173874	0.0332059
gene:275	AMT	2.26118	2.12159	1.23954	1.72111	2.56319	1.6779	1.53417	1.48829	1.80355	1.37832	1.50591	1.8889
gene:401138	AMTN	0	0	0	0	0	0	0	0	0	0	0	0
gene:276	AMY1A	0.019309	0	0.0372728	0.062185	0.0350109	0.0260283	0.012872	0	0	0.044053	0.0196284	0.0336021
gene:277	AMY1B	0.03535	0	0	0.010206	0.00749596	0	0.003025	0	0	0	0	0.0486601
gene:278	AMY1C	0.018854	0	0.0364105	0.046997	0.0361416	0.0254161	0.012569	0	0	0.043017	0.0274713	0.0328116
gene:279	AMY2A	0	0	0	0	0	0	0.114178	0.0952585	0	0.082587	0.14234	0
gene:280	AMY2B	1.17625	1.48364	1.21497	1.38624	1.29609	1.56457	1.91952	1.52808	1.15672	1.08319	1.45032	1.51944
gene:155185	AMZ1	0.02008	0.0471572	0.0189673	0.18537	0.123295	0.0764071	0.27357	0.098025	0.0515318	0.208581	0.0795884	0.16775
gene:51321	AMZ2	6.28308	7.55106	7.54642	4.22472	3.59294	3.28233	4.18452	3.59659	3.96325	2.74777	3.07727	3.60866
gene:64682	ANAPC1	3.60433	3.71356	4.02554	4.14162	4.09425	4.09331	3.77969	3.74302	4.04313	4.75427	4.21994	3.86813
gene:10393	ANAPC10	2.88849	1.93775	2.83046	4.48344	3.91473	4.30108	5.94956	4.47533	4.0536	4.14679	3.89321	3.25118
gene:51529	ANAPC11	39.8025	46.4326	43.5949	47.1372	45.8149	44.3646	47.2961	43.8241	44.2918	43.5789	47.3379	48.6844
gene:25847	ANAPC13	15.5829	17.4413	15.8322	6.57354	6.86413	5.44282	6.17098	6.8966	5.59666	6.14793	7.35403	6.52206
gene:25906	ANAPC15	14.4082	15.2471	16.1354	9.08362	8.48877	6.9151	8.56663	7.87625	7.12978	10.8443	10.5435	9.87924
gene:119504	ANAPC16	20.2273	16.3633	18.0694	10.3724	10.1715	9.22557	10.9404	8.77628	9.32183	9.51869	10.9451	9.53026
gene:29882	ANAPC2	16.2626	17.0847	17.2976	22.389	23.4351	19.8394	21.6116	19.0817	18.482	23.6903	20.6684	23.6222
gene:29945	ANAPC4	4.13264	3.57751	3.91987	3.19774	2.70126	2.87595	3.40077	4.46199	3.72682	2.5614	3.57965	3.65292
gene:51433	ANAPC5	26.7615	27.3587	27.6761	23.9687	25.3152	23.9579	24.6648	24.2631	22.5136	25.4939	24.1955	23.9258
gene:51434	ANAPC7	5.05309	4.72208	6.8394	6.0832	5.48617	7.20403	6.46253	6.81529	5.70675	6.73038	4.71644	5.08221
gene:283	ANG	10.0268	10.498	9.89829	10.912	8.99889	11.4329	9.61696	8.56935	8.57661	9.95756	10.1796	9.51921
gene:23357	ANGEL1	1.64908	1.65129	1.70805	1.70416	1.40769	1.47421	2.22256	2.10157	1.83563	1.24319	1.55312	1.51227
gene:90806	ANGEL2	5.91397	5.75285	5.64814	1.86426	1.37557	1.54243	1.83291	2.3702	2.15039	1.39759	1.88411	1.54051
gene:284	ANGPT1	0	0	0	0	0	0	0.013041	0	0.0128283	0	0	0
gene:285	ANGPT2	0.063816	0.0743124	0.138113	0.153912	0.0181616	0.0459117	0.059423	0.0496029	0.0791314	0.089891	0.0346269	0.0654453
gene:51378	ANGPT4	0	0	0	0	0	0	0.008469	0	0	0	0.00637244	0
gene:9068	ANGPTL1	0.070491	0.0157585	0	0.047911	0.0391882	0.0152643	0.061151	0.0361131	0.0987872	0.052578	0.0430886	0.0320001
gene:23452	ANGPTL2	0	0.0737813	0	0.051365	0.0783437	0	0.014513	0.068275	0.0773006	0.226591	0.0449918	0.0342785
gene:27329	ANGPTL3	0.018135	0.0624468	0.0291149	0.090511	0.020975	0.168102	0.036538	0.101584	0	0.084473	0.00166042	0.0289659
gene:51129	ANGPTL4	0.231459	0.336451	0.34612	9.59112	10.4995	10.0051	9.28455	8.16405	8.31027	10.4477	10.9148	10.883
gene:253935	ANGPTL5	0	0	0.0286868	0	0.0210375	0	0	0.0216704	0	0	0	0
gene:83854	ANGPTL6	0	0.0498915	0	0	0.0283617	0.0126778	0.099542	0.00604113	0.0257968	0.055625	0	0.055406
gene:10218	ANGPTL7	0	0.0169866	0	0	0.0181319	0.081389	0	0.0419938	0.0251937	0.029809	0	0.00509813
gene:55908	ANGPTL8	0.086103	0.00702867	0.0674294	0.007535	0.0963227	0.0862002	0.100585	0.137642	0.0572911	0.207227	0.174907	0.256565
gene:286	ANK1	1.16787	0.754172	1.12162	0.146168	0.118444	0.105253	0.407873	0.246362	0.279361	0.258026	0.12338	0.331174
gene:287	ANK2	1.19947	0.769735	1.29124	0.647833	0.666749	0.690714	0.866116	0.621343	0.574476	0.676159	0.499755	0.494685
gene:288	ANK3	39.5264	42.1905	39.7519	10.8347	11.5395	11.1821	10.8419	10.5278	10.31	11.8966	12.8067	10.0924
gene:150709	ANKAR	0.372114	0.180176	0.17004	0.39662	0.324211	0.176768	0.093152	0.111075	0.173871	0.085495	0.140211	0.166053
gene:348094	ANKDD1A	0.329773	0.289656	0.41427	0.381279	0.336992	0.417895	0.481622	0.446828	0.314757	0.30201	0.237754	0.235607
gene:728780	ANKDD1B	1.81888	1.63597	1.42471	1.67127	1.18342	1.05243	0.663247	1.12142	1.13013	1.00831	1.22263	0.840112
gene:63926	ANKEF1	0.9911	0.966571	1.11109	0.299043	0.486931	0.478241	0.523273	0.602113	0.790415	0.347532	0.31851	0.390594
gene:162282	ANKFN1	0.004102	0.00473522	0	0	0	0.00598599	0	0.010027	0	0	0.012037	0.0014769
gene:51479	ANKFY1	8.76297	9.29869	8.63602	11.6821	11.4846	10.3486	10.7263	11.6464	12.3572	11.9342	10.9571	11.0212
gene:56172	ANKH	14.9416	14.4595	15.3019	16.449	14.1057	15.2865	15.6673	15.6759	14.7073	16.5403	15.6423	15.8192
gene:54882	ANKHD1	16.6828	13.2803	14.9085	15.6815	14.5041	22.8484	17.7694	16.2909	17.6554	20.0162	15.5725	12.4189
gene:404734	ANKHD1-EIF4EBP3	10.9979	11.9353	10.1484	17.9603	18.0017	12.3011	14.2172	14.8323	15.1928	15.8696	16.7441	16.2926
gene:54467	ANKIB1	6.93356	6.33383	6.35844	7.78885	7.54114	7.35535	7.61064	8.39548	7.96605	7.15822	6.96013	6.96567
gene:255239	ANKK1	0.159557	0.106135	0.055805	0.331263	0.34977	0.422249	0.709447	0.287694	0.205057	0.189354	0.216035	0.419632
gene:126549	ANKLE1	0.023094	0.0722129	0.0253895	0.481142	0.298017	0.540795	0.344709	0.275257	0.145328	0.581893	0.377195	0.60871
gene:23141	ANKLE2	22.1115	23.5717	23.1576	25.8961	23.4546	23.9764	24.4176	22.2389	25.3065	27.1623	21.7668	23.5961
gene:51281	ANKMY1	2.0452	2.58655	2.47761	1.10204	1.14332	1.49992	1.22863	1.48348	1.23531	1.71639	1.30908	1.39508
gene:57037	ANKMY2	14.2514	12.9039	13.3208	12.7008	11.8283	10.645	13.9032	12.3782	12.4481	12.1768	12.0356	11.327
gene:57763	ANKRA2	11.9806	10.5479	10.662	6.87974	7.22706	6.02906	8.43719	8.8341	7.7687	7.65411	6.55106	7.51862
gene:27063	ANKRD1	0.162203	0.0247445	0.059489	0	0.0632813	0	0.054229	0.0573358	0.0283807	0	0	0.0274115
gene:55608	ANKRD10	49.8475	48.6106	47.5868	50.8863	51.4971	50.5253	49.418	53.5359	49.1925	50.6433	52.9237	46.7447
gene:29123	ANKRD11	32.1089	37.2985	33.7137	37.2262	38.8174	37.0198	38.9567	40.314	41.2713	39.4095	39.5339	40.145
gene:23253	ANKRD12	5.90632	5.4944	4.55202	6.26311	6.84921	5.8177	6.09134	7.24867	7.16763	6.38824	6.3058	5.69006
gene:88455	ANKRD13A	9.78579	9.95322	9.07858	21.424	22.5092	19.2406	24.1907	20.3076	21.6022	21.1789	20.0614	20.8149
gene:124930	ANKRD13B	0.272052	0.616146	0.489766	2.87177	2.79199	3.26489	2.52597	2.78288	2.0217	3.44638	2.88038	3.05713
gene:81573	ANKRD13C	6.68164	5.83906	5.73247	7.89246	8.11761	7.68791	7.76945	7.92052	6.72265	8.20019	7.46986	7.33202
gene:338692	ANKRD13D	8.8927	10.6192	10.4898	18.7005	20.0163	20.1954	23.1454	20.8253	20.3383	23.1902	21.7135	23.0254
gene:54522	ANKRD16	0.649704	1.00356	0.703933	1.5128	1.13245	1.02062	1.47882	1.28467	1.12701	1.20267	1.84941	1.82401
gene:26057	ANKRD17	14.6577	12.1319	12.5835	10.8201	12.7666	11.6632	10.4897	10.4409	11.4474	11.0423	11.8172	11.2389
gene:253650	ANKRD18A	0	0.0764699	0.0871553	0.049014	0.217101	0	0.071744	0.0504369	0.0594022	0.149501	0.0569241	0.135601
gene:441459	ANKRD18B	0	0	0	0.068329	0	0.0474999	0.029675	0.0246707	0	0.024804	0	0.051894
gene:26287	ANKRD2	0	0	0	0	0	0	0	0	0	0.026594	0	0
gene:84210	ANKRD20A1	0.084698	0.133195	0.034577	0.056772	0.0188675	0.0700361	0.054685	0.0155778	0.114619	0.039911	0.0225282	0.147327
gene:118932	ANKRD22	3.68577	4.42265	3.54009	14.5648	14.6294	12.7935	12.5081	12.2687	11.7241	12.1806	12.5196	11.0112
gene:200539	ANKRD23	0.53571	0.47573	0.274786	0.688534	1.04207	1.12559	0.863844	0.673815	1.18845	1.8629	1.09832	0.699609
gene:170961	ANKRD24	0.122301	0.17206	0.258158	0.28546	0.399877	0.358519	0.289638	0.327053	0.207549	0.255255	0.298018	0.27981
gene:22852	ANKRD26	1.5375	1.23905	1.34111	0.769085	0.822218	0.755706	0.922533	1.07632	0.863583	0.722051	0.749747	0.991089
gene:84079	ANKRD27	9.46048	8.64598	8.87917	18.6472	19.3383	19.2765	16.0757	16.5726	16.8249	18.4857	19.1542	17.7828
gene:23243	ANKRD28	5.82565	5.7569	5.51454	5.67761	5.5605	5.50349	6.04673	6.00924	5.72948	5.60333	6.03619	5.49158
gene:147463	ANKRD29	0.03384	0.140137	0.0738012	0.068495	0.282332	0.116951	0.25665	0.425391	0.209511	0.233009	0.373945	0.280074
gene:91074	ANKRD30A	0	0	0	0	0	0	0	0	0	0	0	0
gene:374860	ANKRD30B	0	0	0.00870697	0	0	0	0	0	0	0.008763	0	0
gene:256006	ANKRD31	0.018836	0	0	0	0	0	0	0	0	0.008327	0	0
gene:341405	ANKRD33	0.217031	0.238091	0.245993	0.119253	0.436341	0.252422	0.388937	0.533874	0.260883	0.16188	0.330977	0.382732
gene:651746	ANKRD33B	0.040501	0.0888967	0.0315065	0.150803	0.104729	0.100365	0.209427	0.256614	0.340005	0.132086	0.129687	0.230417
gene:284615	ANKRD34A	0.021724	0.0670213	0.0638259	0.675403	0.740451	0.641759	0.918556	0.96106	1.03266	0.562117	0.607616	0.934769
gene:340120	ANKRD34B	0	0	0.0147665	0.013634	0.0152351	0.0149474	0.010958	0.0356317	0	0	0.0188863	0.00996583
gene:148741	ANKRD35	0	0	0	0.043377	0.033497	0.0289355	0.076049	0.0111522	0.0127887	0.065056	0	0.0275555
gene:375248	ANKRD36	1.11337	1.33785	1.14747	1.24671	1.74318	1.56101	2.18837	1.69376	1.92602	1.74587	1.12017	1.5144
gene:57730	ANKRD36B	0.826162	0.869767	0.772568	0.76872	1.00335	1.03936	1.30976	1.2264	0.983246	1.03039	0.674134	0.819054
gene:400986	ANKRD36C	0.607317	0.477317	0.417477	0.493272	0.425833	0.37427	0.955922	0.627465	0.720376	0.826852	0.467391	0.388057
gene:353322	ANKRD37	0.412417	0.455133	0.503222	1.7316	0.691124	1.0552	1.60405	0.678163	1.3685	1.43711	1.49288	1.73029
gene:51239	ANKRD39	3.9589	3.72228	3.57012	4.05151	4.51069	3.52768	5.17332	4.31398	3.84955	4.71797	4.08003	4.89894
gene:91369	ANKRD40	6.50009	6.13263	6.2599	8.65726	8.15293	8.32193	8.42575	9.13602	9.00582	8.81547	8.3836	7.95843
gene:55018	ANKRD40CL	23.3919	20.3547	19.6438	14.8044	11.6128	14.657	13.6189	10.2947	9.326	12.0515	12.9436	13.5117
gene:338699	ANKRD42	1.98685	2.50563	2.50684	10.5174	12.114	10.5732	11.0243	9.69286	9.34532	11.6838	10.05	9.62157
gene:91526	ANKRD44	0.503261	0.518423	0.656271	0.462242	0.15285	0.261452	0.212979	0.489118	0.399826	0.411842	0.246797	0.224664
gene:339416	ANKRD45	0.039934	0.0134682	0.100569	0.055109	0.0259207	0.0812037	0	0.0121536	0.00575733	0	0.109616	0.0305689
gene:157567	ANKRD46	4.17117	4.48319	4.35668	7.63297	9.01973	7.04274	8.66785	9.88203	8.96879	6.76804	7.90651	7.02096
gene:54851	ANKRD49	5.27754	4.65912	5.1112	8.6962	8.29796	7.45267	7.76679	8.67102	8.91791	8.55756	8.40012	7.62309
gene:57182	ANKRD50	1.95848	1.4614	1.55907	1.765	1.80737	1.73893	1.96064	1.9444	1.58286	1.75978	1.94407	1.57689
gene:283373	ANKRD52	12.9005	14.2676	13.4193	16.1323	15.6261	16.0973	16.4124	15.9841	15.3743	18.2576	15.477	16.6024
gene:79998	ANKRD53	0.036104	0.252043	0.0277287	0.256651	0.228518	0.0446531	0.311242	0.0939322	0.0333367	0.004346	0.120564	0.153992
gene:129138	ANKRD54	12.0173	11.8402	12.424	19.994	18.8639	17.4334	17.1926	16.6742	15.2694	19.2491	18.826	20.1487
gene:79722	ANKRD55	0	0	0	0	0	0	0	0	0	0.008364	0	0
gene:22881	ANKRD6	0	0.0219988	0.0486474	0.143598	0.113009	0.0819008	0.062452	0.1414	0.209259	0.067467	0.0484399	0.0957202
gene:140731	ANKRD60	0	0	0	0	0	0	0	0	0	0	0	0
gene:100310846	ANKRD61	0.14804	0.144253	0.264622	0.673214	0.457644	0.793641	0.519126	0.661009	0.89604	0.546734	0.291778	0.640392
gene:342850	ANKRD62	0	0	0	0	0	0	0	0.00269815	0	0	0	0
gene:100131244	ANKRD63	0	0	0.0107973	0.076268	0.0726118	0.094484	0.059512	0.0286852	0.0526116	0.035024	0.0312562	0.0414654
gene:441869	ANKRD65	0.124413	0.41471	0.340205	0	0	0.110109	0	0.0626499	0	0.054139	0.0553929	0.0534673
gene:56311	ANKRD7	0	0	0	0.014307	0	0	0	0	0	0	0	0
gene:122416	ANKRD9	12.8097	14.207	13.9503	20.2022	18.2669	18.7192	17.069	18.7174	18.7735	21.6008	19.3009	22.6775
gene:23294	ANKS1A	9.52837	9.79677	9.08499	14.2098	14.2439	14.3534	13.4947	14.0666	14.3622	15.3712	13.4197	14.5322
gene:56899	ANKS1B	0	0	0	0	0.008989	0	0	0.0058985	0	0.034789	0.107462	0
gene:124401	ANKS3	2.28775	2.44144	1.68645	5.87305	5.05154	4.64484	5.47792	5.45813	4.08049	4.72424	6.2004	6.7326
gene:257629	ANKS4B	17.3323	17.4709	18.4284	11.2854	11.2575	10.5481	10.0467	10.219	10.4894	11.9633	10.5863	10.7478
gene:203286	ANKS6	5.48616	6.21851	6.42405	8.90655	8.10408	8.06897	9.39635	8.38556	8.75351	9.47478	8.82633	8.6134
gene:389161	ANKUB1	0.001172	0	0.0567912	0.065622	0.41521	0	0	0.115659	0	0.047671	0.0656423	0
gene:55139	ANKZF1	14.0127	13.5492	15.2124	23.5221	25.0654	25.0168	25.2172	24.7342	23.5989	24.7719	23.8505	26.6131
gene:54443	ANLN	1.18114	1.32176	1.1352	1.3149	1.62653	2.10099	1.68823	1.7057	1.4926	1.63171	1.68434	1.70037
gene:55107	ANO1	2.47716	2.74173	2.31085	3.39563	3.58833	3.36081	3.20963	3.5342	3.21915	3.8731	2.83659	2.86792
gene:55129	ANO10	10.903	10.7618	10.4295	15.8703	18.2152	15.4888	17.5013	16.0683	15.6087	16.9201	15.7296	15.6026
gene:57101	ANO2	0	0	0	0	0.022608	0	0	0.0344867	0	0.035937	0	0.0149885
gene:63982	ANO3	0	0	0.00657833	0	0	0	0	0	0	0.014418	0	0.00441977
gene:121601	ANO4	0.50515	0.383325	0.323675	0.280231	0.207643	0.226252	0.151733	0.0836814	0.327018	0.165739	0.126349	0.162312
gene:203859	ANO5	0.070887	0.0465826	0.0500215	0.086242	0.0625358	0.108087	0.100572	0.090612	0.1515	0.082385	0.0870143	0.227168
gene:196527	ANO6	29.4888	27.4958	26.0078	27.7905	27.8501	24.763	26.6732	24.9953	23.9273	26.93	27.6235	25.4475
gene:50636	ANO7	1.42687	0.771899	1.34712	0.729344	0.636938	0.606722	0.582904	0.737532	1.05462	1.12711	0.866698	1.08374
gene:57719	ANO8	1.99216	2.32017	2.18042	5.29765	4.46105	5.67915	5.4731	5.69125	5.1734	5.40531	4.71257	5.84832
gene:338440	ANO9	85.0515	94.0168	97.2122	102.57	95.9358	113.491	116.348	102.688	92.107	122.88	97.7907	111.594
gene:3730	ANOS1	0	0.0172885	0.0404703	0.025251	0.0263952	0.0375684	0.066388	0.029651	0.00894339	0.033998	0.00891789	0.0267004
gene:8125	ANP32A	63.8448	63.2832	63.3412	36.0475	34.9044	33.9904	35.8662	33.2075	34.0287	33.1048	34.9359	34.0011
gene:10541	ANP32B	70.1248	66.3532	68.3921	44.5761	41.2887	40.6999	38.7019	32.4641	31.3486	43.5066	41.1299	40.1431
gene:23519	ANP32D	0	0	0	0	0	0	0	0	0	0	0	0
gene:81611	ANP32E	6.0932	5.36183	6.04002	6.16954	5.08501	5.8854	5.61288	5.27329	5.28155	5.63949	5.29537	5.54205
gene:290	ANPEP	380.783	344.229	392.523	209.703	215.905	199.506	180.06	115.812	98.7584	224.404	176.399	211.907
gene:65990	ANTKMT	9.20603	11.0697	12.7166	9.139	9.34319	9.58991	8.57121	10.2024	7.54325	9.67447	8.04374	10.0979
gene:84168	ANTXR1	0	0	0	0	0	0	0	0	0	0	0	0
gene:118429	ANTXR2	13.1567	10.4258	17.2814	3.79462	4.08612	3.66694	4.11284	6.86718	6.50145	6.63789	5.33574	3.60879
gene:301	ANXA1	4.94496	5.78917	4.75363	19.2368	17.5287	18.0587	20.9831	25.1422	25.0138	15.9254	17.3842	16.9431
gene:11199	ANXA10	16.0198	20.5696	15.5409	18.1046	18.2296	18.0981	19.4055	25.443	28.0005	18.1058	17.9715	16.9373
gene:311	ANXA11	113.791	125.381	127.672	143.028	143.562	156.721	148.128	128.909	125.012	146.714	132.67	145.206
gene:312	ANXA13	178.531	196.032	177.014	126.248	121.485	116.551	115.797	97.9759	100.78	111.957	124.184	115.415
gene:302	ANXA2	727.847	936.299	849.97	925.844	910.82	980.002	972.264	949.057	993.761	950.353	957.058	940.93
gene:389289	ANXA2R	0.142024	0.134966	0.177858	0.134064	0.0946103	0.120239	0.325005	0.273611	0.479417	0.143371	0.0504068	0.493738
gene:306	ANXA3	92.3581	107.668	98.6736	66.9305	67.2501	64.1374	59.9045	64.4989	58.9223	62.0577	69.5804	64.4517
gene:307	ANXA4	130.134	138.35	131.784	105.076	109.286	104.849	102.155	118.464	124.65	98.3551	105.036	96.9631
gene:308	ANXA5	63.5533	61.2254	61.7883	91.8384	95.2137	94.3005	100.514	92.4848	95.7669	94.7314	92.6327	98.581
gene:309	ANXA6	3.56262	4.29755	3.72471	5.0613	5.04085	4.92732	7.94524	9.29557	7.44682	5.26128	4.55144	7.00019
gene:310	ANXA7	19.1253	21.9921	20.5198	19.6521	18.7729	19.5331	24.9715	22.6728	22.4629	19.2679	19.3227	19.4975
gene:653145	ANXA8	0.040383	0	0.0715124	0.058434	0.037863	0	0.040225	0	0.0244474	0.027705	0.00914893	0
gene:728113	ANXA8L1	0	0	0	0	0.0128953	0	0	0	0	0	0	0
gene:8416	ANXA9	5.55282	5.50039	5.30466	3.9594	3.18867	4.50989	3.9559	3.5461	3.92178	3.57814	5.1429	4.56965
gene:313	AOAH	27.1222	29.4406	26.3709	17.8596	17.7778	15.8443	18.5842	18.7679	18.8701	17.0119	15.6541	15.3931
gene:26	AOC1	194.105	216.96	204.206	169.271	168.443	167.472	156.622	157.2	158.729	167.89	159.348	168.943
gene:314	AOC2	0.254117	0.41721	0.302737	1.99341	1.44312	1.77798	1.64969	1.16117	1.16686	1.39493	1.98271	1.5906
gene:8639	AOC3	0.049489	0.105695	0.0735171	0.736716	0.577383	0.681445	0.395383	0.401459	0.496053	0.719275	0.562905	0.584775
gene:84909	AOPEP	7.99662	7.40297	6.43816	9.58957	7.88666	8.39108	7.54826	7.58197	10.2223	10.0466	10.0893	6.54365
gene:316	AOX1	0.482538	0.57643	0.410468	0.671879	0.707474	0.455821	0.861057	0.839268	1.0774	0.77907	0.651603	0.681736
gene:55435	AP1AR	11.9606	11.4347	12.5068	16.8913	19.8359	13.291	16.327	17.0295	17.8351	14.8948	20.6725	13.4646
gene:162	AP1B1	42.2039	48.4693	44.9244	54.726	54.2389	52.8184	58.9161	56.8545	56.3686	57.8444	53.0756	56.6121
gene:164	AP1G1	21.7008	21.7791	20.6805	15.7788	18.0381	15.2111	16.9386	16.388	16.6948	15.9967	16.7403	14.8217
gene:8906	AP1G2	47.4921	49.6681	44.739	26.891	28.8757	30.9288	31.1861	31.3705	29.5374	30.3741	26.0895	33.6898
gene:8907	AP1M1	4.87629	9.64781	15.9252	8.53392	4.40082	8.80786	4.74642	4.45629	3.87795	5.88892	3.53301	5.53125
gene:10053	AP1M2	55.3916	65.7513	60.4396	49.565	46.0136	47.8366	51.5466	51.7005	47.3046	51.0683	50.7602	49.2548
gene:1174	AP1S1	94.882	106.543	96.831	70.0654	67.0151	67.4408	64.2014	75.4143	75.8259	68.1998	71.3181	67.4379
gene:8905	AP1S2	3.45487	2.0274	2.98947	3.03225	3.61724	2.94235	3.15928	3.27402	2.82114	2.66077	2.97434	2.3935
gene:130340	AP1S3	2.14369	2.20737	2.34208	5.72136	6.19867	6.11735	8.2436	8.92281	8.47638	5.07876	5.83259	5.57728
gene:160	AP2A1	52.5001	58.8316	56.6217	75.2028	77.0653	78.5643	78.0684	77.2543	72.4274	81.273	73.3607	81.3798
gene:161	AP2A2	25.3853	27.6898	27.479	25.9658	23.676	24.3804	25.9757	24.7423	21.755	24.6774	22.9073	23.127
gene:163	AP2B1	25.9361	27.4092	25.8513	22.7743	23.002	22.2705	22.9973	22.3894	21.284	22.1899	22.7677	24.3622
gene:1173	AP2M1	120.733	128.391	133.28	142.244	126.103	108.924	136.778	139.847	136.72	124.602	128.16	138.521
gene:1175	AP2S1	48.113	57.8545	56.0297	69.3601	68.9707	62.6041	67.4051	66.9017	64.9119	67.079	64.0176	68.7394
gene:8546	AP3B1	16.2742	15.8422	15.7193	14.6075	13.7089	14.546	11.9871	12.3536	13.9665	13.6268	13.7591	11.7689
gene:8120	AP3B2	0.399085	0.238672	0.257261	0.474797	0.642595	0.524071	0.528177	0.809036	0.311321	0.593385	0.352861	0.356257
gene:8943	AP3D1	46.5843	51.3395	47.2083	49.5625	50.0431	50.0719	49.9773	51.476	48.0548	53.2056	49.0205	51.9979
gene:26985	AP3M1	13.1145	14.0446	13.9925	10.2861	10.7498	10.044	10.3584	10.3966	11.492	10.555	9.91814	10.0567
gene:10947	AP3M2	1.42785	1.43367	0.976449	2.67869	2.86227	2.35343	2.12373	3.30367	2.4943	2.45337	2.46607	2.98441
gene:1176	AP3S1	35.2337	35.6459	33.5411	35.0662	35.1381	35.4789	35.3338	36.4797	36.5382	30.0787	35.3905	32.7846
gene:10239	AP3S2	10.2277	8.18988	8.9646	4.78735	6.00145	4.95969	5.15444	5.34239	4.97584	4.71909	4.33274	5.12433
gene:10717	AP4B1	2.18638	2.25957	2.77093	5.06642	4.68908	3.95543	7.50486	6.11974	4.97632	5.53078	4.50912	4.54238
gene:23431	AP4E1	1.99013	1.8192	1.60882	2.33885	2.04729	2.26385	2.25932	2.22268	2.50971	1.98033	2.38758	2.02763
gene:9179	AP4M1	5.70022	5.9522	6.61225	3.78526	3.12978	3.32845	3.56541	2.8321	3.0337	2.86561	2.94401	3.43684
gene:11154	AP4S1	0.969462	0.85348	1.36312	0.478173	0.294963	0.318094	0.561234	0.394558	0.422347	0.322428	0.343384	0.240348
gene:91056	AP5B1	6.13756	7.39041	6.82886	5.36402	4.99133	5.31782	4.48217	4.98429	4.52232	5.74735	4.81684	5.20614
gene:55745	AP5M1	5.70319	6.76756	7.06035	4.12152	3.60226	3.38303	4.21275	3.91686	4.41591	4.09239	3.77123	3.35062
gene:55317	AP5S1	1.82898	1.74033	2.03927	0.343099	0.198898	0.129943	0.067312	0.178363	0.217629	0.441625	0.339706	0.133238
gene:9907	AP5Z1	12.8976	12.9512	14.3048	8.17438	9.95147	10.7499	10.4193	10.255	9.27272	10.4964	8.9252	12.116
gene:317	APAF1	4.8909	4.81086	4.76822	8.56794	8.49283	8.48618	7.91901	8.64342	8.37301	9.20766	8.62841	7.31364
gene:320	APBA1	0.125184	0.0697639	0.126347	0.056469	0.0372693	0.0702008	0.070187	0.0423672	0.0400036	0.066847	0.0641277	0.0806612
gene:321	APBA2	0	0	0	0	0	0	0	0	0	0	0.00871523	0
gene:9546	APBA3	7.54799	7.87234	6.72153	7.39904	9.2793	10.6183	8.9473	8.84009	8.9822	9.2445	8.17338	9.08285
gene:322	APBB1	1.12588	1.05414	1.51106	1.89442	2.25086	2.29989	3.47728	3.10244	2.59763	1.95867	1.97157	2.67376
gene:54518	APBB1IP	0	0.0185187	0	0	0	0	0	0	0	0	0	0
gene:323	APBB2	6.09784	5.03709	5.16125	6.11181	5.98903	5.6323	7.12915	7.12057	5.70728	6.26804	5.61772	5.8306
gene:10307	APBB3	1.81701	2.09777	2.35553	2.64379	3.07169	3.1472	4.50767	4.11163	3.38954	2.55175	3.17582	4.07703
gene:324	APC	8.05055	5.40152	5.05662	2.47497	3.55967	2.61048	2.17049	2.7333	2.48881	3.14099	2.28635	2.95378
gene:10297	APC2	0.354777	1.37409	0.307208	0.85106	1.01033	3.16599	0.541654	1.52865	0.478127	0.986066	1.57674	1.38384
gene:147495	APCDD1	0.105391	0	0.0957817	0.264491	0.101908	0.372859	0.294901	0.419202	0.424623	0.286647	0.283654	0.348655
gene:164284	APCDD1L	0.022206	0	0.0141701	0.010956	0	0	0	0.0147864	0	0.022553	0.0141811	0.0249096
gene:327	APEH	39.5875	47.0065	42.36	38.7376	35.7731	35.8148	41.9427	48.9584	41.5014	36.8712	34.9592	39.7222
gene:328	APEX1	110.322	97.6286	107.075	104.335	104.016	106.463	105.628	85.0539	86.6027	111.528	106.407	111.628
gene:27301	APEX2	8.81126	8.0066	8.24721	10.3481	11.1383	11.4339	11.9446	11.4037	10.8405	11.4445	11.1591	12.0942
gene:51107	APH1A	77.9529	76.3839	73.5179	48.4231	46.8107	46.6923	44.0061	41.3878	42.2896	44.5202	45.6551	45.7447
gene:83464	APH1B	6.75611	7.13155	6.48757	3.22895	3.43828	3.314	3.85371	3.9867	5.00856	3.61421	3.37812	3.04018
gene:8539	API5	30.4341	26.1878	30.5825	42.593	45.3343	40.407	43.6872	40.9846	42.4639	40.7639	41.9045	38.9769
gene:51074	APIP	6.18436	4.03881	4.70024	5.95079	5.8261	5.30704	6.961	6.02695	5.3798	4.55684	6.20394	6.15008
gene:200558	APLF	0.24358	0.147747	0.216782	0.577577	0.639114	0.485867	0.843449	0.92811	1.10852	0.510914	0.722465	0.661576
gene:8862	APLN	0.03204	0	0	0.016374	0.0316089	0	0.035039	0	0.0173793	0.030419	0.0500759	0
gene:187	APLNR	0	0	0	0	0.015526	0.0152331	0.025436	0.0140207	0	0	0	0.0126952
gene:333	APLP1	1.20917	1.27018	0.843866	0.852863	1.08038	0.961353	1.11095	1.10445	0.934587	1.53951	1.04698	1.41516
gene:334	APLP2	355.065	369.39	353.819	393.541	394.097	389.983	392.772	381.162	373.053	385.886	373.75	388.844
gene:57136	APMAP	32.0272	35.8928	34.267	45.6053	43.9204	42.3404	50.6622	51.4107	54.4944	47.4279	42.3609	48.4837
gene:335	APOA1	13.5171	13.5518	16.8215	14.4558	13.7095	13.4981	11.5274	11.0291	10.1796	13.3602	13.2254	15.4115
gene:336	APOA2	39.0337	41.7358	40.2287	32.8823	33.4082	32.4902	41.542	33.673	33.4742	30.4504	34.8819	29.489
gene:337	APOA4	0.758251	0.472276	0.836733	0.544659	0.577274	0.69409	0.375611	0.355128	0.587855	0.598792	1.23548	0.758608
gene:116519	APOA5	0	0	0	0	0	0	0	0	0	0.022914	0	0
gene:338	APOB	1.65021	1.85982	1.72466	1.06784	1.07062	0.945724	0.417676	0.400079	0.556343	0.767599	0.953681	0.639873
gene:339	APOBEC1	6.78685	9.41728	8.70263	8.19448	6.45328	7.36965	6.93394	8.05392	7.78159	6.70251	7.4925	6.52382
gene:10930	APOBEC2	0.126463	0.115786	0.29379	0.079849	0.0692853	0.0631609	0.025492	0.0158165	0	0	0	0.0317548
gene:200315	APOBEC3A	0.328066	0.276002	0.229991	0.406054	0.522383	0.538534	0.490807	0.701877	0.535616	0.253363	0.348055	0.656693
gene:9582	APOBEC3B	15.274	16.9265	15.171	13.2102	11.5558	11.8119	14.734	14.192	14.4013	12.0478	14.1753	14.0006
gene:27350	APOBEC3C	4.945	6.16703	4.83633	2.82402	3.22571	3.5356	3.27143	3.30382	3.47791	3.56155	3.37964	3.80123
gene:140564	APOBEC3D	0.216547	0.276742	0.148414	0.251328	0.192389	0.141262	0.147754	0.270023	0.107673	0.062092	0.191796	0.182932
gene:200316	APOBEC3F	0.824736	1.5229	0.745905	1.28644	0.795052	0.662124	1.16181	0.820605	1.09811	1.16558	0.594657	1.30295
gene:60489	APOBEC3G	0.020017	0	0	0	0	0.104009	0	0.0950287	0.0285653	0	0	0.0281971
gene:164668	APOBEC3H	0.032594	0	0	0	0	0	0	0	0	0	0	0
gene:403314	APOBEC4	0	0	0.0195345	0.047819	0.0240345	0.0343356	0.073185	0.0517097	0.0345073	0.067114	0.0198809	0
gene:55911	APOBR	3.4215	3.77865	3.3119	0.843238	0.848845	0.837232	0.759379	0.54661	0.896194	0.830971	0.714251	0.738397
gene:341	APOC1	1.64592	1.9223	1.85999	1.05929	3.64687	2.09038	2.11745	1.6118	3.20748	2.0411	2.29501	1.7143
gene:344	APOC2	0.115786	0.355246	0.362761	0.38512	0.372527	0.402837	0.268472	0.10315	0.0302859	0.115743	0.388157	0.278917
gene:345	APOC3	0.206593	0.284399	0	0.847618	0.420541	0.408888	0.472939	0.36545	0.209459	0.362676	0.396061	0.205444
gene:347	APOD	1.59237	1.05559	1.33967	1.61224	0.887795	1.0643	0.712321	0.670947	1.22785	0.600931	0.929708	1.16568
gene:348	APOE	6.60951	7.2995	8.80593	8.63975	7.0603	7.95305	7.60571	6.97544	6.05977	9.9869	7.91249	10.017
gene:319	APOF	0.030322	0	0	0	0	0	0	0	0	0.031308	0.0258402	0
gene:350	APOH	0.171453	0.492837	0.140747	0.065202	0.0371095	0	0.072529	0.0578429	0.303696	0.043246	0	0.167972
gene:8542	APOL1	0.36024	0.276371	0.238136	0.245364	0.214677	0.055504	0.203236	0.131107	0.281491	0.16808	0.186673	0.129607
gene:23780	APOL2	7.30885	7.42595	7.50034	2.99487	2.78557	3.5465	3.64534	3.60242	4.0201	2.75697	2.57513	3.582
gene:80833	APOL3	0	0	0	0	0	0	0	0	0	0	0	0
gene:80832	APOL4	0	0	0.0321814	0	0	0.0263218	0	0.00979418	0	0	0	0
gene:80831	APOL5	0	0.0317068	0	0	0	0	0	0	0	0	0	0
gene:80830	APOL6	8.82501	8.53053	8.36781	2.69734	3.20894	2.81505	3.26439	3.02221	3.1709	2.72359	2.88468	2.80591
gene:81575	APOLD1	0.305191	0.151148	0.118843	0.392189	0.985737	0.478759	0.728637	0.669587	0.675985	0.52465	0.897788	0.657526
gene:55937	APOM	11.3222	13.7718	12.8277	15.4215	16.8203	10.7352	13.9519	11.9201	12.961	15.6392	13.1495	11.8365
gene:79135	APOO	1.5826	2.08873	1.73207	1.52292	2.06038	2.12073	1.09094	1.8016	1.90748	2.32355	1.56679	1.71079
gene:139322	APOOL	4.80244	3.78714	3.89204	3.40025	3.98414	3.23927	3.61075	3.80342	3.92369	3.24501	3.91734	3.42543
gene:351	APP	537.406	592.468	582.149	465.585	458.997	439.992	531.092	521.409	468.479	465.226	450.586	483.662
gene:10513	APPBP2	6.2972	5.12796	5.31087	3.65669	3.93506	4.09087	4.40833	4.62825	4.83661	3.83389	3.85128	3.85364
gene:26060	APPL1	7.29269	5.95186	6.62483	8.05446	7.87536	8.45934	8.2033	7.76821	8.18443	7.7317	8.2702	7.30001
gene:55198	APPL2	42.0021	44.8642	45.0919	33.813	30.8326	31.4291	35.4257	36.6233	33.0411	32.4656	33.1736	30.4615
gene:353	APRT	18.2856	22.0237	19.6895	19.4974	21.1591	19.5971	18.1909	17.8147	19.1364	21.4632	21.192	18.1182
gene:54840	APTX	6.439	7.62388	7.6645	9.92432	9.12479	8.64634	10.2278	11.0379	9.02783	8.28922	7.54447	9.56051
gene:358	AQP1	0.170361	0.0404823	0.142131	0.084161	0.135705	0.121937	0.145454	0.159065	0.0599503	0.116252	0.135298	0.126156
gene:89872	AQP10	0	0	0	0	0	0	0	0	0	0	0	0
gene:282679	AQP11	3.30018	4.23792	3.74508	4.58868	4.39914	5.01619	3.21635	4.04107	5.14304	4.53666	4.24577	4.43036
gene:375318	AQP12A	0.015219	0.141867	0.0655304	0	0	0	0	0	0	0	0	0
gene:653437	AQP12B	0.017259	0.0757926	0.0182199	0	0	0	0	0	0	0.018184	0	0.0254152
gene:359	AQP2	0	0	0	0	0.0134135	0	0	0	0	0	0	0
gene:360	AQP3	1.65431	1.68121	2.20865	3.22545	3.30118	2.46136	2.89923	2.13373	2.25488	3.3102	2.5039	2.96659
gene:361	AQP4	0	0	0	0	0	0	0.032677	0.0163811	0	0	0.042978	0
gene:362	AQP5	0	0	0	0	0	0	0	0	0	0	0	0
gene:363	AQP6	0	0	0	0	0	0	0.010145	0	0.00502558	0	0	0
gene:364	AQP7	5.43744	4.87539	4.7635	6.68015	6.03671	6.5432	6.75536	6.98024	6.31685	6.45547	6.09653	6.74584
gene:100509620	AQP7B	0	0.0149141	0	0	0	0	0	0	0	0	0	0
gene:343	AQP8	0.560267	0.789774	0.762517	0.432577	0.567832	0.416703	0.195528	0.52129	0.191842	0.754227	0.544077	0.500493
gene:366	AQP9	0	0	0	0	0	0	0	0	0	0	0	0
gene:9716	AQR	4.95055	4.26242	4.75707	3.81449	3.8963	3.81115	4.14813	4.64044	4.35734	3.97242	3.68655	3.64587
gene:367	AR	0.004958	0	0	0.00386	0	0	0	0.00328751	0	0.003835	0.00956502	0
gene:369	ARAF	23.2833	23.7293	24.0579	10.1367	10.8489	11.5056	10.0289	10.5544	10.7277	10.5851	10.2235	10.0496
gene:116985	ARAP1	22.9444	26.1815	25.1025	18.1	18.2081	17.4036	18.7361	18.349	15.4935	19.207	17.6546	19.2401
gene:116984	ARAP2	4.33654	3.70372	3.92595	3.19192	2.96917	2.85502	3.30496	3.80686	3.79117	3.39223	3.08155	3.39474
gene:64411	ARAP3	0.152489	0.11016	0.190209	0.189916	0.16174	0.222511	0.416785	0.309576	0.237513	0.270749	0.143823	0.214905
gene:23237	ARC	0.013431	0.0378517	0	3.24232	2.79674	3.11368	2.75654	2.67368	2.52234	3.04371	2.4639	2.56599
gene:372	ARCN1	46.3379	49.5263	43.5387	26.0447	33.3064	26.7471	26.5913	26.759	28.9735	25.2457	24.94	31.0516
gene:374	AREG	18.311	27.3133	21.8459	100.027	105.782	102.201	101.557	114.308	103.208	90.0938	93.8491	99.1294
gene:9870	AREL1	7.08249	7.46161	7.01355	8.7448	9.74029	8.75842	8.72467	9.50092	8.76866	9.02402	8.40081	8.95191
gene:375	ARF1	225.989	249.851	238.249	189.065	199.189	194.126	177.062	197.196	193.473	193.496	189.855	202.441
gene:377	ARF3	86.6711	88.9297	85.4085	67.1591	68.7367	68.1682	68.9839	69.391	70.0994	69.0092	66.8895	72.8929
gene:378	ARF4	97.5751	103.434	106.52	101.888	104.327	99.4565	106.35	104.252	99.5655	100.436	102.763	95.5217
gene:381	ARF5	78.1966	90.6515	85.2105	55.3778	54.9205	53.2736	54.1857	56.1107	50.9844	51.7923	55.4761	57.1655
gene:382	ARF6	53.2749	47.9979	49.7683	38.1013	39.5866	38.1051	38.4286	40.3513	39.8199	37.2152	37.461	38.1808
gene:55738	ARFGAP1	22.7208	27.3871	25.7394	59.1386	53.9518	59.1346	59.9821	59.3771	52.6171	68.6451	50.2782	63.5308
gene:84364	ARFGAP2	26.5863	27.7222	27.7707	11.9652	11.7275	12.0323	13.7689	12.5958	11.4726	11.333	10.542	12.9032
gene:26286	ARFGAP3	28.5733	27.3689	26.8096	21.1352	20.9335	21.8675	24.0684	24.2244	22.8518	20.8855	19.0448	20.2052
gene:10565	ARFGEF1	20.5831	19.4844	19.1714	10.605	10.5225	9.84569	9.22837	10.2789	9.96882	9.58192	9.56826	8.86776
gene:10564	ARFGEF2	13.574	13.103	13.6035	9.54108	9.09895	8.46627	8.77448	8.83366	9.20143	9.03994	8.94866	8.47195
gene:57221	ARFGEF3	2.1197	2.03466	1.95646	1.74114	1.92021	1.65917	1.93965	2.04091	2.02245	1.69943	1.80841	1.62839
gene:27236	ARFIP1	18.1655	16.2868	17.186	25.0789	22.1634	22.0566	24.0626	24.8871	26.6942	24.6848	22.3062	22.4526
gene:23647	ARFIP2	29.9346	27.7156	24.7909	52.4385	52.0279	44.1759	42.7415	41.2904	45.3296	49.5725	48.0571	46.7359
gene:10139	ARFRP1	7.48599	9.81317	9.34808	9.08146	8.96337	9.51003	10.797	9.32539	9.44065	8.69071	7.79348	10.6013
gene:383	ARG1	0.083619	0	0.183206	0.053748	0	0.0888403	0	0.0522456	0	0.169257	0.0885396	0
gene:384	ARG2	5.01715	4.90088	3.55269	12.3669	11.3466	11.1056	16.0827	17.9881	17.077	12.5088	11.25	12.1753
gene:55082	ARGLU1	32.6712	27.8805	27.4329	37.3672	39.4969	37.9879	42.0679	41.9665	40.179	37.1011	36.5142	35.8932
gene:392	ARHGAP1	24.9829	30.1033	26.8553	6.81187	6.73601	7.48639	8.06603	8.60665	7.56972	6.31319	6.3242	7.13966
gene:79658	ARHGAP10	1.69827	1.69841	2.05823	3.21559	2.55829	3.10885	3.15933	3.49172	3.09295	2.86223	2.29619	2.63357
gene:9824	ARHGAP11A	0.926913	0.898288	0.756551	1.20002	1.17839	1.30254	0.493319	1.49176	1.52693	1.30429	1.70956	1.442
gene:114118903	ARHGAP11A-SCG5	0.119296	0.240369	0.463419	0	0	0	1.05368	0	0	0	0	0
gene:89839	ARHGAP11B	0.312802	0.0542647	0	0.299418	0.959191	0.585376	0.199657	0.806804	0.22882	0.635841	1.01573	0.398993
gene:94134	ARHGAP12	17.8256	15.8064	15.7994	18.5572	17.7551	17.0675	16.886	18.2054	17.6563	17.8533	17.9326	15.4829
gene:55843	ARHGAP15	0	0	0	0	0	0	0	0	0	0	0	0
gene:55114	ARHGAP17	26.6061	27.8223	26.0649	29.2129	29.0415	28.2943	29.55	30.3754	29.1294	32.2071	28.3515	31.4238
gene:93663	ARHGAP18	24.5026	22.8194	21.4017	22.2112	23.8123	23.1473	24.587	25.8167	24.5481	21.1098	21.6903	20.8567
gene:84986	ARHGAP19	1.82936	1.73334	1.71286	2.93451	2.50629	2.62279	2.60133	2.81451	2.75958	2.64337	2.2121	2.49372
gene:57569	ARHGAP20	0.007516	0.0090213	0.0156631	0.046573	0.0745258	0.0475633	0.027363	0.05898	0.00905359	0.022899	0.00905789	0.0766993
gene:57584	ARHGAP21	14.8284	15.8912	14.4227	8.8616	7.21989	8.58826	8.12745	9.77697	9.15628	8.22634	7.48046	7.39227
gene:58504	ARHGAP22	0	0	0	0	0	0.015663	0	0	0.0398673	0	0	0
gene:57636	ARHGAP23	1.57889	1.19239	1.11751	0.594581	0.596526	0.520547	0.481896	0.457974	0.483712	0.641826	0.579742	0.510308
gene:83478	ARHGAP24	0.025301	0.0291177	0.0394136	0.072848	0.0744871	0.00804306	0.053314	0.0271697	0.0816563	0.062839	0.0352613	0.0674506
gene:9938	ARHGAP25	0	0.0785072	0	0	0.0333035	0	0	0	0	0.030264	0	0
gene:23092	ARHGAP26	16.4954	16.9352	16.9076	42.3652	39.9737	41.4038	39.9829	38.9883	38.792	43.3164	39.5247	41.4777
gene:201176	ARHGAP27	58.4849	67.3443	64.5422	45.8663	45.2762	48.7231	53.9046	49.1285	53.8609	46.7229	47.8858	51.7301
gene:79822	ARHGAP28	0	0	0	0	0	0	0	0.00835101	0	0	0	0
gene:9411	ARHGAP29	0.980166	1.01821	0.897156	2.08726	2.39691	2.7438	3.06022	3.40284	3.44489	2.14284	2.54468	2.38231
gene:257106	ARHGAP30	0.116163	0.0477806	0.0621828	0.135211	0.0892775	0.0946244	0.039231	0.0637444	0.233334	0.152076	0.129236	0.101228
gene:57514	ARHGAP31	0.246701	0.265505	0.263411	0.096806	0.157711	0.144487	0.156508	0.138613	0.177597	0.158023	0.153913	0.137993
gene:9743	ARHGAP32	14.3448	16.0371	14.0118	11.6383	10.9711	11.675	9.67668	11.0761	10.3455	11.0417	10.4399	11.0509
gene:115703	ARHGAP33	0.485101	0.819596	0.355555	0.984273	1.38186	1.18937	1.29492	1.12156	0.87874	1.25609	0.798407	1.14555
gene:2909	ARHGAP35	28.7471	29.3723	27.4964	26.5041	25.9728	25.347	22.2295	23.0675	24.6119	25.8204	26.223	23.6739
gene:80728	ARHGAP39	4.60714	4.67948	4.93216	10.2602	10.8991	10.0877	8.9606	8.87065	9.20413	11.6443	10.6396	10.9063
gene:393	ARHGAP4	0.059281	0.318822	0.538753	1.62917	0.877805	1.05866	0.60103	0.525094	0.258339	1.66281	1.68942	2.23466
gene:343578	ARHGAP40	0	0	0	0	0	0	0	0	0	0.035824	0	0
gene:143872	ARHGAP42	11.0772	10.7152	10.3368	13.4192	13.8799	13.4983	13.3905	13.5713	13.7215	14.1029	14.4152	12.8028
gene:9912	ARHGAP44	0.808965	0.563738	0.478523	1.0177	0.983752	0.856789	1.5346	1.22178	0.897405	0.905152	0.895322	1.05962
gene:23526	ARHGAP45	3.406	4.37624	3.89571	8.00009	8.85138	8.93503	8.15623	8.25124	8.26235	8.7474	9.13154	7.97512
gene:394	ARHGAP5	23.0134	20.5988	19.3301	23.7855	23.0965	20.456	19.5542	16.57	20.4968	22.935	20.11	18.0851
gene:395	ARHGAP6	0.061335	0.0638876	0.0365797	0.025882	0.012802	0.0247161	0.034486	0.0709534	0.16454	0.029836	0.0558413	0.0580837
gene:23779	ARHGAP8	18.2498	22.7779	20.1325	41.5748	40.0548	40.285	37.1113	35.6695	33.843	41.8198	37.4091	37.8139
gene:64333	ARHGAP9	0.062692	0.0187894	0.205007	0.363677	0.0774195	0	0.097802	0.0302384	0	0.075604	0.105343	0
gene:396	ARHGDIA	193.335	214.042	196.659	122.868	122.842	135.322	125.747	117.368	119.816	129.103	119.405	142.407
gene:397	ARHGDIB	5.67822	5.79584	5.56976	4.93967	6.69386	5.20411	5.91383	5.49499	5.07123	7.90763	7.05441	6.03119
gene:398	ARHGDIG	0.0411	0	0	0.093461	0.0743084	0.1648	0	0.0395799	0	0.115723	0.0947867	0.0497427
gene:9138	ARHGEF1	26.2276	28.2203	26.9246	18.2026	17.2633	17.6424	18.4262	19.0994	17.2481	17.7793	14.0591	18.0056
gene:9639	ARHGEF10	0.09147	0.211985	0.0881849	0.153543	0.730044	0.298481	0.112058	0.859993	0.506799	0.135792	0.553934	0.448617
gene:55160	ARHGEF10L	42.5612	46.4915	45.0093	26.0337	24.6286	25.6286	30.4	26.3296	23.2154	26.8781	23.869	28.4153
gene:9826	ARHGEF11	14.6939	16.0497	15.5467	9.98599	9.2928	10.5005	9.93763	11.1693	10.5429	10.5052	10.9024	9.31481
gene:23365	ARHGEF12	16.9624	17.4197	15.2655	21.3313	22.4942	21.4115	22.3553	23.5844	22.6097	21.9838	21.6726	21.5116
gene:22899	ARHGEF15	0	0	0	0	0	0	0	0	0	0	0	0
gene:27237	ARHGEF16	51.9318	55.3922	55.3652	28.1891	26.8344	28.5053	23.3556	26.0076	25.6069	28.2051	25.0337	27.541
gene:9828	ARHGEF17	1.27922	1.45229	1.55029	0.515845	0.19568	0.379601	0.221807	0.41738	0.193349	0.399728	0.500052	0.357781
gene:23370	ARHGEF18	19.8153	21.2721	21.439	27.0014	28.222	28.2724	26.9075	24.4948	24.2847	29.5278	27.5841	29.0353
gene:128272	ARHGEF19	1.35482	1.36772	1.16557	1.95979	1.81259	1.79287	2.01071	2.37676	1.82414	1.84957	1.70548	2.54387
gene:9181	ARHGEF2	30.0734	33.5361	29.4736	24.1781	23.1191	25.0228	21.8905	22.8277	24.1665	25.7779	26.1898	23.5712
gene:115557	ARHGEF25	0	0.0603111	0	0.032107	0	0.173425	0	0.0457676	0.0437165	0.054703	0	0.103247
gene:26084	ARHGEF26	0.472886	0.428804	0.540379	3.49293	3.16361	3.48675	3.84155	3.24064	3.32724	3.22302	3.59784	3.23966
gene:64283	ARHGEF28	5.81392	5.77468	5.32655	4.54279	4.63357	4.19524	4.01321	4.41821	4.70972	4.16335	4.3688	4.56678
gene:50650	ARHGEF3	2.75654	2.50468	2.34794	2.67909	2.88383	2.592	2.89697	4.03692	3.14645	2.69037	2.52541	2.44394
gene:100271715	ARHGEF33	0.071506	0	0	0.345595	0.147263	0.163953	0.150981	0.0473386	0.216477	0.249509	0.0325935	0.0592179
gene:445328	ARHGEF35	11.7236	11.0906	9.90508	5.8618	6.25411	5.68611	4.35213	6.07136	6.84272	5.68158	5.89299	5.59762
gene:389337	ARHGEF37	4.4867	5.45727	4.75042	1.76144	1.87243	1.75489	2.45331	1.9755	1.76163	1.96724	1.74117	1.71635
gene:54848	ARHGEF38	2.70845	2.26951	2.46706	2.60715	3.11551	3.0856	2.66719	2.68604	2.21932	2.49637	2.90876	2.58687
gene:84904	ARHGEF39	0.738092	0.751898	1.1164	1.43961	0.875032	1.10923	1.34215	1.23605	1.30749	1.11897	0.786267	1.09616
gene:50649	ARHGEF4	0	0.0305606	0.0100589	0.052186	0.0504208	0.120685	0.068161	0.0952863	0.137485	0.081977	0.0453345	0.111032
gene:55701	ARHGEF40	2.51082	3.02056	2.79598	3.83857	3.89466	3.52593	4.83719	4.0902	4.49365	4.31002	3.91979	4.36776
gene:7984	ARHGEF5	19.5036	17.913	17.4596	14.726	12.8691	14.0488	12.0515	13.2921	12.866	14.7589	14.1797	14.2212
gene:9459	ARHGEF6	0.009572	0	0.0114088	0.019914	0.0260745	0.000803331	0.029006	0	0	0	0.00861243	0.0200906
gene:8874	ARHGEF7	16.6797	14.6037	14.9097	18.5729	18.679	16.8763	19.7326	17.8751	18.7631	20.2343	18.2189	17.3811
gene:23229	ARHGEF9	2.20816	2.46881	2.21526	1.56911	1.275	0.988845	0.989334	1.40368	1.21691	1.30885	1.15432	0.920575
gene:8289	ARID1A	22.6459	23.404	21.914	9.93028	9.97772	9.93765	10.2626	10.2379	9.74629	11.4881	9.33573	10.6602
gene:57492	ARID1B	10.1077	11.5642	10.0488	3.60986	4.19084	3.89892	2.68187	3.6298	2.93765	4.305	4.18279	3.8265
gene:196528	ARID2	4.45598	3.76986	4.14547	1.69207	1.76719	1.76291	1.79979	1.96559	1.50772	1.86967	1.49351	1.83653
gene:1820	ARID3A	60.5037	58.8698	57.6715	42.1737	40.2386	41.898	33.7791	32.823	30.9102	42.6228	41.8933	38.748
gene:10620	ARID3B	9.87215	10.7529	10.1507	27.4129	27.6868	28.2598	26.9011	27.984	28.2143	29.8424	28.5162	28.2264
gene:138715	ARID3C	0.041737	0.182206	0.0625385	0.34615	0.328929	0.239464	0.369439	0.234822	0.372779	0.231552	0.16381	0.333024
gene:5926	ARID4A	6.4012	5.70281	5.2711	6.7401	7.37797	6.35684	7.21008	6.92195	7.70008	7.30515	6.53341	5.8506
gene:51742	ARID4B	6.93841	6.32776	7.63788	8.68216	8.62952	7.54129	8.21358	8.45039	8.47447	7.19632	9.3194	7.17163
gene:10865	ARID5A	1.50898	1.78422	1.99202	28.3401	27.64	27.2316	23.7653	21.8961	20.9462	25.5177	24.2129	28.4549
gene:84159	ARID5B	6.72021	6.00563	5.72084	6.90526	6.6806	6.06999	6.79919	7.33567	7.42787	7.60774	7.14032	6.54204
gene:25820	ARIH1	4.05113	3.5962	3.70264	4.65201	4.68211	4.20613	4.49251	4.23854	4.78541	4.13262	4.15927	4.30227
gene:10425	ARIH2	16.4434	15.1091	15.4817	25.1991	29.0325	26.0221	25.3635	25.3851	22.1401	28.0595	27.0905	25.1063
gene:400	ARL1	25.738	24.8489	26.4135	23.0231	22.0037	23.1898	25.253	24.3276	25.062	23.4762	23.0555	21.2942
gene:285598	ARL10	0.895115	0.43415	0.511952	1.92435	2.44693	1.42728	2.55084	1.46046	1.28779	2.43066	2.26289	2.13497
gene:115761	ARL11	0	0.0337409	0	0.034084	0	0	0.023386	0	0.0311279	0	0	0
gene:392509	ARL13A	0.119608	0.119784	0	0	0	0.0453911	0	0.0240704	0	0	0	0
gene:200894	ARL13B	0.540523	0.753063	0.596006	3.3678	4.43036	4.11989	4.785	4.8724	5.49449	3.47145	3.89137	3.38918
gene:80117	ARL14	9.19089	10.2828	7.85451	30.7281	30.785	27.8563	38.3093	36.3388	31.4518	30.0456	29.0856	30.4294
gene:120534	ARL14EP	4.59761	4.04133	4.52027	1.68116	2.02804	1.36278	2.30254	2.68937	2.15129	1.69536	2.02346	1.87179
gene:54622	ARL15	8.2027	6.27543	7.24799	7.5837	8.12084	6.51139	7.33965	7.13137	6.65067	7.50343	8.14475	6.98743
gene:339231	ARL16	8.09349	9.84424	9.62659	11.7304	12.2801	13.7894	14.6534	14.4835	13.1892	11.8294	12.5755	13.9294
gene:51326	ARL17A	4.63131	3.90158	3.77754	4.67583	3.67913	3.72058	4.19916	4.15123	5.02164	4.70159	4.24393	4.0772
gene:100506084	ARL17B	2.22523	1.81024	2.00857	1.84114	1.90047	2.00906	2.81884	2.80789	2.50806	2.17291	2.29312	2.00031
gene:402	ARL2	30.7173	31.2014	31.5947	24.473	23.106	22.342	23.3784	21.9628	20.8554	20.0065	22.9757	25.3382
gene:23568	ARL2BP	6.27729	9.18436	5.78564	3.89434	5.37459	3.18315	4.08244	3.70452	4.36428	5.77489	2.99583	5.92447
gene:403	ARL3	1.11136	1.31281	1.25048	3.40577	3.11429	2.96406	3.13882	3.03337	3.38248	2.89843	3.31489	3.60672
gene:10124	ARL4A	46.367	68.069	67.7196	42.5148	45.5455	33.0992	25.0604	34.3264	33.865	31.9415	32.1335	31.5535
gene:101928788	ARL4AP5	0.069245	0.167771	0	0.127645	0.050122	0.0494848	0.095874	0.115796	0.0659455	0.059454	0.0701888	0.101619
gene:10123	ARL4C	0.702925	1.0038	0.792772	8.09914	8.39052	7.59578	8.88256	8.39675	7.65927	7.01494	7.90557	7.79395
gene:379	ARL4D	0.636668	0.220657	0.615015	1.93701	1.89648	1.87489	2.16464	1.59367	2.01941	2.36007	1.69997	1.80337
gene:26225	ARL5A	5.31331	4.08066	4.81652	5.73338	6.52727	7.01562	6.37303	7.60328	5.9968	5.90382	6.12885	5.1017
gene:221079	ARL5B	9.45065	6.72488	7.92966	15.5718	17.6378	15.942	13.6918	14.7383	14.2205	14.1683	15.8954	12.792
gene:390790	ARL5C	0	0	0	0.008901	0.02356	0	0	0.0212752	0.0265837	0	0	0.00342855
gene:84100	ARL6	0.247333	0.44946	0.248826	1.21004	1.34025	1.44526	1.23419	1.2856	1.31763	1.6857	1.40623	0.974734
gene:23204	ARL6IP1	62.8887	61.7759	63.3963	174.933	179.402	168.598	169.375	156.137	159.024	180.045	186.313	178.009
gene:51329	ARL6IP4	46.8027	52.2954	44.5128	44.3246	43.4266	33.0855	41.4268	29.5974	36.3322	42.562	36.998	39.4426
gene:10550	ARL6IP5	63.7808	58.8527	65.0459	66.4587	69.7463	67.4035	53.1582	61.854	67.5571	65.6821	70.4396	58.7094
gene:151188	ARL6IP6	9.7516	7.22273	7.22145	10.6179	13.8952	10.3741	13.1139	11.8805	11.7302	11.0428	9.519	9.99116
gene:127829	ARL8A	11.5581	13.3303	10.6706	14.1423	13.8424	14.7477	15.9732	15.5603	15.2695	15.3464	14.6637	16.9487
gene:55207	ARL8B	19.8332	18.8262	19.4135	25.6945	24.7281	23.5811	22.6499	24.0046	24.3232	25.2035	26.3546	23.5226
gene:132946	ARL9	0	0	0.150756	0	0	0	0	0	0.110357	0	0.0221493	0.047372
gene:55156	ARMC1	8.60299	7.12167	7.17808	8.68752	9.48542	8.84693	9.87157	9.08351	10.0153	8.28678	8.594	8.90961
gene:83787	ARMC10	9.22973	8.20843	9.20914	8.59424	7.47917	6.85706	6.175	8.10358	9.39814	9.38044	9.39695	7.8581
gene:221481	ARMC12	0	0	0.0332412	0.141198	0.206758	0.0896163	0.025008	0.1233	0.177066	0.134512	0.0471036	0
gene:84071	ARMC2	0.111176	0.123057	0.036483	0.299267	0.452728	0.359266	0.654624	1.1867	0.569955	0.436906	0.235565	0.398359
gene:219681	ARMC3	0.010656	0.0250267	0.132789	0.151865	0.0140608	0.0127461	0.071506	0.0370808	0.0518914	0.02289	0.0323155	0.0146975
gene:79798	ARMC5	2.79101	3.69061	3.55468	0.480158	0.485064	0.654737	0.793372	0.745408	0.793162	0.581568	0.281455	0.361705
gene:93436	ARMC6	6.74994	7.5623	6.95336	2.26051	1.62739	2.17408	2.1712	2.35268	2.19865	2.63509	1.99288	2.19343
gene:79637	ARMC7	8.99602	7.37071	7.30966	4.16866	5.2753	3.91393	4.46542	5.57375	4.16298	4.28318	4.90887	4.59697
gene:25852	ARMC8	5.86462	5.23794	4.99887	5.62579	5.98122	5.99241	7.33473	5.7179	5.93203	7.33615	5.48787	6.39047
gene:80210	ARMC9	1.43298	1.27089	1.1723	2.56828	2.35583	2.77121	3.38288	3.06414	2.88063	2.72391	2.65423	2.62065
gene:51309	ARMCX1	0.734061	0.63441	0.762727	0.452637	0.558366	0.524724	0.867297	0.535293	0.34585	0.523911	0.551432	0.739204
gene:9823	ARMCX2	0.305707	0.262018	0.347392	1.31455	1.53451	1.67927	1.64888	1.89898	1.54994	1.88848	1.30166	1.48619
gene:51566	ARMCX3	22.9927	19.5638	21.5581	21.8688	20.5631	21.6733	21.8128	20.0399	18.1411	19.9786	19.481	19.0393
gene:100131755	ARMCX4	0.696877	0.186775	0.477519	0.25688	0.1222	0.0517651	0.148559	0.238652	0.219426	0.212735	0.366403	0.0594066
gene:64860	ARMCX5	2.77815	3.51799	3.16964	0.75409	1.26398	1.12176	1.54247	1.54926	1.06518	0.908931	0.653588	0.993703
gene:100528062	ARMCX5-GPRASP2	2.41268	2.28602	2.33614	1.02139	1.3902	0.963934	1.03364	0.918874	1.15266	0.952563	1.68372	1.06367
gene:54470	ARMCX6	8.90289	8.06868	8.04585	6.73239	5.48016	5.83722	5.42704	5.03914	4.88937	5.02719	5.21741	6.11732
gene:339541	ARMH1	0.052833	0.426819	0.284856	0.654013	0.481734	0.277933	0.879029	0.296683	0.815019	0.224827	0.560947	0.750219
gene:101928603	ARMH2	0	0	0	0.121989	0	0.109305	0.071758	0	0.0516546	0.135208	0	0
gene:79591	ARMH3	8.81433	9.46973	8.7759	2.72203	3.19582	3.16646	2.94732	3.15232	3.49716	3.29407	3.08534	3.23351
gene:145407	ARMH4	0.023557	0.111409	0.0703599	0.108583	0.0614647	0.0945367	0.122656	0.144384	0.131634	0.058118	0.360491	0.124311
gene:387715	ARMS2	0	0	0	0	0	0	0	0	0	0	0	0
gene:79624	ARMT1	20.8576	18.2116	20.8177	21.9133	22.8879	20.8179	23.1866	25.4495	23.2708	20.2877	21.819	21.7965
gene:405	ARNT	7.89229	7.17335	6.47517	7.3282	7.7803	7.65308	8.74674	8.68862	9.18228	7.43234	7.25737	8.6233
gene:9915	ARNT2	0.571691	0.567669	0.658403	0.152078	0.163184	0.0995692	0.325078	0.205289	0.185223	0.213056	0.0817931	0.272282
gene:10552	ARPC1A	72.7557	77.9258	72.4976	76.1612	70.4235	76.8854	67.2166	74.6701	64.4869	74.3906	67.1702	74.2253
gene:10095	ARPC1B	56.3496	72.7127	61.8629	45.8542	50.2031	58.7389	44.4973	73.4072	61.4672	55.4243	47.121	62.958
gene:10109	ARPC2	250.452	273.458	258.628	190.888	185.565	183.443	185.78	205.286	208.946	187.425	193.413	178.945
gene:10094	ARPC3	158.588	166.504	158.401	124.046	115.763	113.857	121.742	130.504	122.979	118.979	118.302	116.156
gene:10093	ARPC4	76.7158	80.431	76.1381	49.5473	52.5903	45.175	48.0534	49.2071	49.021	48.1911	45.8077	46.799
gene:100526693	ARPC4-TTLL3	0.918515	1.69517	2.16592	3.53287	2.60554	2.76693	4.30679	2.42678	2.42828	2.99783	1.72575	2.98803
gene:10092	ARPC5	23.6848	21.1462	23.8159	43.4463	22.5657	23.3831	23.8821	24.1546	48.1945	44.8464	46.5631	22.4204
gene:81873	ARPC5L	17.5652	15.1374	16.0939	34.0466	27.448	35.4154	32.6624	30.3248	32.9454	32.015	33.9736	28.9939
gene:348110	ARPIN	5.74151	7.14498	6.10976	2.75184	2.58662	2.75085	3.40189	3.50919	3.75713	2.98716	2.81263	2.43938
gene:100526783	ARPIN-AP3S2	1.9074	3.07052	2.4889	0.992944	0	1.29094	1.72218	1.63462	2.48566	2.62969	1.48623	1.48766
gene:10776	ARPP19	16.953	13.4623	16.3849	16.475	16.8012	17.201	15.2542	16.7628	15.7101	14.7271	15.4424	14.0019
gene:407	ARR3	0.238529	0.18319	0.257693	0.067442	0.063188	0.0819456	0.160195	0.0832724	0.118049	0.230169	0.0398706	0.174063
gene:408	ARRB1	36.6361	36.1605	34.2436	19.0672	19.6917	18.2731	16.3908	15.7359	16.9841	19.7517	19.6713	18.7104
gene:409	ARRB2	11.745	12.5651	12.9873	40.4943	37.2628	40.3212	43.7286	37.9688	37.1946	43.9912	41.2501	46.7344
gene:92714	ARRDC1	61.1857	70.5023	60.1018	53.6844	53.2961	52.5599	56.6772	58.8534	48.0789	57.6446	50.9417	61.3447
gene:27106	ARRDC2	3.18396	4.42986	3.48052	3.54576	3.48049	3.58758	4.33044	4.33041	4.25369	4.4931	3.47861	3.6786
gene:57561	ARRDC3	1.57204	1.52718	1.55038	1.8788	1.5399	1.66661	1.99657	2.48656	2.61293	1.39094	1.38551	1.33109
gene:91947	ARRDC4	39.407	40.0038	40.3059	200.603	198.663	178.915	156.476	140.884	139.614	186.768	198.349	181.688
gene:410	ARSA	8.88041	10.5611	9.7443	10.3258	10.8538	10.6198	12.4748	12.1501	11.9045	11.7574	10.091	12.4525
gene:411	ARSB	1.07126	0.811042	0.908842	0.408284	0.412812	0.367665	0.548056	0.646645	0.509948	0.454095	0.396251	0.425677
gene:414	ARSD	7.7741	8.64458	8.61281	4.44239	4.72034	4.08254	3.83876	4.34858	4.30525	4.006	4.02719	3.89795
gene:22901	ARSG	0.269528	0.292756	0.25752	0.349158	0.355472	0.295166	0.326948	0.313086	0.401018	0.34454	0.291657	0.337147
gene:347527	ARSH	0	0	0.0218959	0	0.0406773	0	0	0	0	0	0	0
gene:340075	ARSI	0	0.0147658	0	0	0	0	0	0	0	0.017248	0	0
gene:79642	ARSJ	5.28984	5.98785	6.27111	3.34064	2.80653	3.44884	2.85022	3.64926	2.64036	2.73503	3.08198	2.89649
gene:153642	ARSK	0.741047	0.415176	0.536059	1.73175	2.05391	1.45615	1.93692	2.26252	2.08083	1.82152	1.86467	1.9454
gene:415	ARSL	11.2158	11.5718	11.4233	9.07534	9.57069	8.99303	8.5259	8.10576	7.00743	9.97178	9.01543	9.51685
gene:419	ART3	0.107257	0.319249	0.0479201	0.037198	0.0539727	0.217807	0	0.0580232	0.0906026	0.064571	0.0644156	0.171657
gene:420	ART4	0	0	0	0	0.00840627	0	0	0.0114701	0	0	0.0108642	0
gene:116969	ART5	0	0	0	0	0.039227	0	0	0	0	0.036497	0	0
gene:9048	ARTN	0.06309	0.197615	0.11339	0.337939	0.411181	0.420866	0.458717	0.405087	0.30634	0.518345	0.140022	0.383627
gene:64801	ARV1	7.33949	8.35054	8.05586	10.322	8.51239	10.8396	13.2716	14.8787	15.3709	9.93182	10.1187	11.5818
gene:421	ARVCF	6.12683	7.20862	6.31346	10.7301	9.50154	10.2519	12.6385	11.4436	10.983	10.9428	8.5911	11.1613
gene:170302	ARX	1.4584	1.37746	1.64095	0.210459	0.160153	0.340396	0.176728	0.156152	0.0553269	0.242728	0.117489	0.273878
gene:57412	AS3MT	0.295565	0.374815	0.396757	0.362305	0.250901	0.589985	0.112261	0.132477	0.17701	0.314906	0.388667	0.330682
gene:427	ASAH1	74.935	51.8142	68.0341	57.692	62.6341	56.9516	56.8038	52.3245	56.0832	58.6858	53.8772	52.6038
gene:56624	ASAH2	0.473365	0.514604	0.829036	0.220754	0.267093	0.151683	0.314392	0.173807	0.160332	0.277637	0.178104	0.172553
gene:653308	ASAH2B	1.01556	1.01977	1.14685	0.323976	0.522742	0.230289	0.486828	0.467749	0.386049	0.257432	0.288072	0.440816
gene:50807	ASAP1	8.80813	8.53766	10.2077	7.94181	7.64587	6.94704	8.01963	8.09708	7.30833	6.54953	6.66471	7.66174
gene:8853	ASAP2	11.1627	13.7888	11.6217	15.055	16.0428	13.7282	14.5136	15.7595	16.1144	14.8503	14.1677	14.0135
gene:55616	ASAP3	2.62198	2.06254	2.76144	4.52554	3.86394	4.36048	7.22328	7.22571	5.61967	3.95059	3.58156	5.5132
gene:51665	ASB1	4.41703	4.80951	3.92369	2.19198	1.98631	1.85116	1.85572	1.98968	1.93709	2.44048	2.0913	2.5177
gene:136371	ASB10	0	0	0	0	0	0	0	0	0	0	0	0
gene:140456	ASB11	0	0	0	0	0	0	0	0	0	0	0	0
gene:142689	ASB12	0.183159	0.38087	0.315463	0.883324	0.480802	0.363613	0.388596	0.218169	0.351866	0.466881	0.496128	0.240578
gene:79754	ASB13	6.29195	6.41794	6.51041	7.37903	6.02912	7.137	7.7002	7.46613	7.45988	6.59521	6.4948	7.6421
gene:142686	ASB14	0.102684	0.0235962	0.0700607	0.139456	0.227243	0.171374	0.194409	0.224603	0.171989	0.22873	0.175314	0.133179
gene:142685	ASB15	0	0	0	0	0	0.0317111	0.011461	0.0107173	0	0.005867	0.0121761	0.0301617
gene:92591	ASB16	0.481675	0.448908	0.178521	0.651737	1.22829	0.907316	1.35235	1.31821	0.710392	0.82856	0.896564	0.858951
gene:127247	ASB17	0	0	0	0	0	0	0	0	0	0	0	0
gene:401036	ASB18	0	0	0	0.018362	0	0	0	0.00743676	0	0	0	0
gene:51676	ASB2	0	0.0192002	0	0.071346	0	0	0.04139	0.0556242	0	0.019375	0	0.0911346
gene:51130	ASB3	2.96021	3.37592	3.35401	5.4446	6.3265	7.81424	7.45976	6.23044	6.36141	6.43191	6.17334	6.79089
gene:51666	ASB4	0	0	0.0270739	0.079336	0.0375433	0.0841002	0.022702	0.0305127	0.0304532	0	0.0992197	0.132444
gene:140459	ASB6	5.611	6.00591	5.27299	10.2451	11.107	10.4129	8.52362	8.02687	7.79971	10.6161	10.5821	9.91744
gene:140460	ASB7	5.14978	3.98682	4.08047	5.22696	4.96927	4.35585	4.371	4.11316	4.17124	3.93406	4.3862	4.4003
gene:140461	ASB8	13.1242	13.0194	13.288	5.37141	6.11326	5.80171	6.168	6.2431	5.78343	5.83855	6.38372	5.29242
gene:140462	ASB9	0.257918	0.491019	0.500224	0.481036	0.103807	0.455848	0.298492	0.327876	0.63149	0.369585	0.584598	0.588798
gene:51008	ASCC1	6.84485	5.92203	7.72471	6.15439	5.13196	4.60326	6.11966	6.75249	5.83228	5.15467	5.62508	6.04402
gene:84164	ASCC2	26.0871	29.1723	29.4475	34.7892	36.327	34.5745	37.7748	39.0303	37.6391	33.7098	33.6074	35.6262
gene:10973	ASCC3	9.51881	9.28091	9.67893	7.76805	8.42297	7.79261	8.21907	8.98295	8.73409	8.00233	8.31381	7.00562
gene:429	ASCL1	1.86559	2.34191	2.36145	0.036315	0.0471835	0	0.02288	0.0956954	0	0	0.036302	0.112371
gene:430	ASCL2	0.741336	0.60693	0.669603	0.16969	0.114928	0.123143	0.071101	0.305821	0.243616	0.092975	0.0905984	0.131792
gene:56676	ASCL3	0	0	0	0	0	0	0.076956	0	0.0637454	0	0.0682465	0.0889287
gene:647219	ASCL5	0.132658	0.299444	0.28297	0.145893	0.294643	0.127879	0.274351	0.136438	0.0885224	0.345526	0.358575	0.275414
gene:110599588	ASDURF	0.777013	0.756918	0.110689	0.264514	0.282223	0.313406	0.985735	0.213296	0.80162	0.124999	0.0940935	1.24898
gene:25842	ASF1A	4.6542	4.00291	4.49994	8.35876	9.8313	8.36726	10.0556	9.24501	9.95791	7.79372	8.61062	8.48619
gene:55723	ASF1B	1.19345	1.32068	1.3435	2.33633	2.64535	2.70195	2.29811	3.70825	1.78619	2.34693	1.82773	2.83626
gene:432	ASGR1	1.06446	1.36184	1.23382	2.09827	1.43883	1.10839	0.93127	1.29472	1.39007	1.63051	1.29456	1.77808
gene:433	ASGR2	0.109938	0.0338021	0	0	0	0.0385024	0	0	0	0	0.0329068	0
gene:55870	ASH1L	9.37647	8.93199	8.79186	5.50812	5.33826	5.29342	5.00279	4.63498	5.05267	5.01754	5.00971	4.84286
gene:9070	ASH2L	10.6168	10.741	10.16	5.39835	5.03628	4.85195	6.64865	5.81035	6.46329	5.19	4.9031	5.51832
gene:41	ASIC1	0.076283	0.0405746	0.0135264	0.020829	0.0475399	0.0674574	0.078225	0.0522148	0.0593742	0.081268	0.0423093	0.0619383
gene:40	ASIC2	0	0.0160406	0	0	0	0.0149172	0	0.0273688	0.024952	0	0	0
gene:9311	ASIC3	1.19545	0.88084	0.548192	2.69476	2.82156	3.49706	2.62373	2.12605	2.2613	3.00384	3.43638	3.66095
gene:55515	ASIC4	0.015887	0	0	0.13828	0.0307383	0.0547045	0.023623	0.0245885	0.0925958	0.063896	0.0262651	0.014914
gene:51802	ASIC5	0	0	0	0	0	0	0	0	0	0	0	0
gene:434	ASIP	0.137601	0.0398993	0	0.111026	0.160703	0.304232	0.099102	0.18284	0.127277	0.4693	0.394607	0
gene:435	ASL	100.22	108.762	94.1405	76.1354	69.3145	76.6716	81.1042	78.4508	71.3399	78.911	70.8082	88.601
gene:438	ASMT	0.036705	0	0	0.033606	0	0.0491845	0.047171	0	0.10532	0.068933	0.0780337	0.0712705
gene:8623	ASMTL	5.52575	5.69935	6.29964	24.2106	22.8975	22.8573	22.7909	20.6984	20.9641	22.1969	21.2661	24.9307
gene:440	ASNS	26.9594	27.1612	23.7695	19.314	22.4887	22.8207	22.9188	17.2373	16.2823	20.1242	20.9609	21.2599
gene:54529	ASNSD1	7.64233	5.46422	6.94738	7.98404	8.52617	8.92953	6.83801	7.10176	8.27084	8.7631	8.9081	6.96044
gene:443	ASPA	0	0	0	0.009055	0	0	0	0.00946434	0	0.010105	0	0
gene:554235	ASPDH	0.655682	0.642304	0.943258	1.0592	0.919319	0.666148	0.610969	0.61144	0.748713	0.609537	0.831522	0.926969
gene:374569	ASPG	0	0.029431	0.0469731	0	0	0.0115401	0.016216	0.0156144	0	0.01153	0	0.002924
gene:444	ASPH	23.508	28.5316	23.3893	30.9781	34.9095	32.1861	29.556	28.4258	29.6548	29.2221	31.451	27.6669
gene:253982	ASPHD1	18.1434	18.5914	19.4152	20.9859	18.5796	18.8003	19.3727	19.7639	20.6154	19.8591	20.2325	20.6884
gene:57168	ASPHD2	0.768825	1.02577	0.987883	3.6292	3.02285	3.23846	2.95278	3.53099	2.84942	4.04831	3.79895	3.37964
gene:259266	ASPM	0.577304	0.428889	0.523023	0.218419	0.227479	0.251854	0.242345	0.178674	0.218056	0.295143	0.215977	0.199785
gene:54829	ASPN	0	0	0	0.021373	0	0	0	0	0	0	0	0
gene:151516	ASPRV1	0.01016	0.193724	0.0354635	0.10587	0.0477057	0.0871156	0.078361	0.0838835	0	0.083333	0.00605328	0.00765166
gene:79058	ASPSCR1	7.14387	8.28815	7.97194	3.02184	2.70584	3.4158	3.26069	2.67442	3.80499	3.3587	2.91761	3.81448
gene:80150	ASRGL1	9.04787	9.44983	8.79734	16.007	15.1317	15.6847	17.6223	14.9092	15.2194	16.75	13.3927	16.8096
gene:445	ASS1	319.319	302.387	321.434	248.427	242.447	242.265	295.276	233.84	215.981	255.443	233.727	258.431
gene:28990	ASTE1	5.02295	4.50402	5.43899	1.10865	1.42874	1.30141	1.16361	1.23673	1.13614	1.228	1.18566	0.941314
gene:431705	ASTL	0	0	0	0	0	0	0	0	0.0466532	0	0	0
gene:460	ASTN1	0.007136	0	0	0	0	0	0	0	0	0	0	0
gene:23245	ASTN2	0.45351	0.242036	0.240944	0.298716	0.398756	0.444544	0.169142	0.220511	0.347878	0.511967	0.226675	0.274455
gene:171023	ASXL1	7.26164	7.01543	6.63328	6.33999	7.25882	6.22731	7.12668	7.26883	6.06377	7.31377	6.39298	6.32423
gene:55252	ASXL2	4.00695	4.05312	3.55042	2.4514	2.68979	2.48038	2.22197	2.15071	2.44769	2.36692	2.11629	2.10597
gene:80816	ASXL3	0.106355	0.0570032	0.0637745	0.022395	0.0733008	0.0588499	0.062092	0.0819995	0.0541427	0.056747	0.055201	0.0563386
gene:84896	ATAD1	11.6445	10.5823	10.2516	11.112	12.5719	12.7146	10.5242	10.7976	11.7108	10.4806	11.7613	10.2673
gene:29028	ATAD2	2.70232	2.59407	2.8419	5.85834	5.94539	5.12765	5.15695	4.97075	4.73299	6.24627	6.04856	5.19955
gene:54454	ATAD2B	2.81489	3.05102	2.78237	1.44895	1.93168	2.02623	1.86261	1.78122	1.50573	1.82704	2.27853	1.95132
gene:55210	ATAD3A	6.85357	7.44232	8.05008	14.8798	15.6024	14.3733	13.2652	14.093	13.226	15.6704	14.2213	14.2239
gene:83858	ATAD3B	3.18013	3.76481	3.37747	10.0141	10.4847	10.9725	9.81147	10.1568	8.28944	11.0762	10.3448	11.5658
gene:219293	ATAD3C	0.152987	0.143334	0.123396	2.4375	2.51273	2.5665	1.68553	1.18803	1.15732	2.16521	2.60037	2.89209
gene:79915	ATAD5	0.250763	0.221631	0.191372	0.614271	0.615966	0.71762	0.550006	0.47361	0.364948	0.493863	0.755565	0.69637
gene:79969	ATAT1	8.81092	7.49714	7.13937	10.1802	8.4671	8.80387	11.175	9.13786	9.50224	9.28474	8.24428	10.0433
gene:85300	ATCAY	0.067605	0.0597125	0.0192051	0.04832	0.107761	0.0432541	0.022763	0.111763	0.0317108	0.065396	0.0644665	0.0235181
gene:11101	ATE1	9.0181	8.33335	8.09746	6.40161	6.54449	6.77644	7.05169	7.7683	7.2938	5.80137	6.14006	5.95293
gene:466	ATF1	9.84485	8.25292	8.44452	4.09253	3.94986	3.40941	2.98614	3.32146	3.61603	3.23171	4.22775	3.23437
gene:1386	ATF2	9.9612	8.4551	9.55418	9.86877	11.3368	12.4996	10.4604	11.0614	11.6306	12.0071	11.5144	10.2202
gene:467	ATF3	9.75147	15.4763	11.5232	119.949	115.889	112.728	139.244	157.887	135.431	114.406	116.996	130.636
gene:468	ATF4	419.406	404.876	384.224	460.962	436.805	454.129	349.395	353.714	339.475	421.323	456.537	412.352
gene:22809	ATF5	16.9709	15.8501	14.9321	4.02597	4.27538	3.7379	3.41032	2.9677	3.16281	4.52786	3.99595	4.57181
gene:22926	ATF6	8.25071	8.6626	7.1802	6.35947	7.28153	6.59524	7.97386	7.88475	7.2744	8.08635	7.07057	6.55041
gene:1388	ATF6B	44.5969	46.091	45.592	44.6124	45.7527	44.9467	49.1756	48.4536	47.6356	44.951	41.3678	47.5584
gene:11016	ATF7	6.05258	7.33353	5.72836	6.40837	7.08444	5.888	6.84962	6.34119	6.52332	6.47377	5.88694	6.80703
gene:55729	ATF7IP	4.61624	4.21544	4.83041	4.04135	3.97962	4.13316	3.93928	4.35426	3.95121	4.3645	4.20025	3.50166
gene:80063	ATF7IP2	17.9294	17.2244	18.3876	10.1177	9.72243	11.7688	10.3972	9.99924	9.65966	10.8263	10.905	12.5625
gene:114108587	ATF7-NPFF	0	0	0	0	0	0	0	0	0	0	0	0
gene:83734	ATG10	1.31215	1.38652	1.94953	0.575904	0.78483	0.792399	0.885287	0.767526	0.773421	0.658536	0.666759	0.884762
gene:60673	ATG101	18.2882	19.8592	21.2101	48.177	48.2575	47.313	43.1883	43.3142	41.5724	46.849	48.5044	49.5359
gene:9140	ATG12	13.736	12.2748	11.4584	19.2178	16.9556	16.7536	14.2814	16.4361	15.398	15.8532	17.3695	15.714
gene:9776	ATG13	16.4599	17.8278	15.5929	14.6874	13.0823	12.5989	13.9888	13.7865	13.3121	13.6125	13.171	13.0175
gene:22863	ATG14	6.46409	6.66841	6.01272	8.80043	8.5263	7.87394	7.77752	7.83544	7.59456	8.05191	8.2778	7.37033
gene:55054	ATG16L1	11.6292	12.0448	12.6742	22.4892	21.5666	21.1158	21.993	20.5229	19.3511	21.9534	22.7868	23.0139
gene:89849	ATG16L2	7.33748	7.45648	7.54142	9.29108	9.21774	13.2976	13.9832	12.6084	11.0515	11.9514	9.95878	11.8938
gene:23130	ATG2A	11.7014	12.9099	12.0767	34.7955	34.4287	34.7793	44.2935	41.7586	37.037	35.6059	32.1713	39.2643
gene:55102	ATG2B	6.52871	5.04825	5.80389	5.8007	5.56429	5.95703	5.64397	5.12052	6.24466	6.09607	5.91513	5.0066
gene:64422	ATG3	20.3234	20.9187	22.2254	21.0459	22.4857	19.5104	18.5976	20.4551	24.4492	21.5194	23.337	18.5479
gene:115201	ATG4A	6.79056	5.95946	6.1648	7.27664	7.91219	7.12765	7.86629	9.05643	9.5511	7.65335	7.6071	6.59958
gene:23192	ATG4B	23.5864	24.2525	23.3306	85.0377	85.4481	89.0263	79.8746	73.4349	74.0556	96.4867	81.7056	84.6531
gene:84938	ATG4C	0.380176	0.298433	0.470369	0.843986	0.523479	0.521321	0.539124	0.67427	0.573838	0.572477	0.305393	0.297996
gene:84971	ATG4D	20.3859	22.786	21.52	18.0587	18.8461	17.2219	15.9801	16.551	16.2315	19.9092	17.5049	18.3256
gene:9474	ATG5	11.3405	11.955	12.2755	7.71002	6.81523	7.31447	7.23569	8.44541	7.91302	6.42723	6.02755	5.80752
gene:10533	ATG7	4.5726	4.724	4.07116	3.14218	3.08908	3.39564	4.46047	3.91653	3.61443	3.40184	3.26134	4.86842
gene:79065	ATG9A	23.1401	24.3184	22.2508	17.372	17.7387	17.877	17.0662	15.6539	17.445	18.6191	17.0465	18.6983
gene:285973	ATG9B	1.26044	2.56619	1.94147	3.19321	3.11888	3.59393	4.7418	3.87246	4.22794	3.32362	2.74521	3.79688
gene:471	ATIC	14.1003	15.9872	15.9159	12.5119	11.2453	11.3417	11.6827	11.9325	13.6828	9.94729	12.7231	12.2977
gene:51062	ATL1	0.513388	0.347647	0.268249	0.657991	0.213555	0.631545	0.716826	0.907725	0.144901	0.439531	0.424503	0.245357
gene:64225	ATL2	15.7902	10.8444	16.053	14.4292	15.0369	13.9727	12.6976	14.7719	15.0737	14.4799	15.5804	15.0026
gene:25923	ATL3	4.55753	3.61114	4.8124	1.91432	2.09442	2.24471	2.03714	2.67793	2.27722	2.3664	2.38959	1.65077
gene:472	ATM	1.64665	1.12741	1.71889	1.7253	1.58329	1.65035	2.24106	2.40898	2.38807	1.60665	1.31332	1.61251
gene:23300	ATMIN	7.70829	8.18334	7.92742	8.89346	8.97709	7.55109	9.22315	8.87312	8.53719	9.38962	8.38083	8.615
gene:1822	ATN1	36.6988	35.4483	33.8839	23.5977	23.5276	23.3562	17.6392	18.7385	20.6799	23.9747	22.9637	23.2137
gene:474	ATOH1	11.9992	13.6585	13.3339	1.20681	0.945475	1.04598	0.808379	0.856808	0.575164	1.05483	0.962341	1.16794
gene:220202	ATOH7	0.127971	0.0517016	0.0473801	0.0329	0.0849214	0.0358467	0.037371	0	0.139799	0.041239	0.174557	0.0365847
gene:84913	ATOH8	0	0	0	0	0	0	0.016721	0	0	0	0	0
gene:56204	ATOSA	7.50214	5.56511	5.61635	4.76162	4.81593	5.06252	4.63909	5.05636	4.60841	4.36902	5.02989	4.62739
gene:80256	ATOSB	11.3872	11.8909	10.2984	17.0273	18.6426	18.8466	15.5711	15.2288	14.9822	16.4956	16.5554	17.7918
gene:475	ATOX1	13.4152	18.4414	11.3437	12.8437	12.1639	13.9133	11.8127	13.9107	11.5291	12.3191	14.5543	14.8075
gene:57194	ATP10A	0.020312	0.00748507	0	0.043297	0	0.0155675	0	0.0206264	0	0.016193	0.00709691	0
gene:23120	ATP10B	17.5134	21.2911	20.1274	21.6526	23.0705	21.4338	26.2375	28.4937	25.6303	21.0854	19.7017	23.0778
gene:57205	ATP10D	0.742111	0.666788	0.449989	0.415304	0.443767	0.403954	0.645534	0.593504	0.363919	0.561487	0.480962	0.502997
gene:23250	ATP11A	24.2948	25.7154	24.0092	21.8202	22.265	19.4582	20.7724	23.3761	21.006	20.6701	20.7993	19.9229
gene:23200	ATP11B	9.72572	9.06606	8.3693	9.5802	10.7777	9.05691	9.71593	10.6999	9.62467	9.62208	9.28991	8.77202
gene:286410	ATP11C	2.44898	2.20993	2.31961	1.43405	1.52735	1.40427	1.75792	1.47893	1.89009	1.42746	1.79638	1.39962
gene:479	ATP12A	0	0	0	0	0	0	0.012841	0	0	0	0	0.0253099
gene:57130	ATP13A1	20.9898	22.0145	20.2106	26.1105	25.7577	26.9012	29.5728	26.3206	26.9112	29.5229	27.0648	28.0707
gene:23400	ATP13A2	49.7633	60.2828	54.4342	49.071	44.0916	46.2411	64.1671	65.0755	56.2744	50.6837	45.238	51.2349
gene:79572	ATP13A3	19.7876	18.1169	18.5272	26.3461	27.5132	26.2241	26.2562	28.9258	28.0399	27.1231	28.1727	24.0835
gene:84239	ATP13A4	0.048418	0.0498324	0.0572758	0.010694	0.0288293	0.00758778	0.032367	0.0200935	0.0306301	0.034708	0.0187316	0.0329774
gene:476	ATP1A1	542.182	585.142	559.31	609.946	586.111	576.38	635.652	609.047	568.08	617.938	589.805	621.778
gene:477	ATP1A2	0	0	0	0	0	0	0	0	0	0	0	0
gene:478	ATP1A3	0.013528	0.0242746	0.0313795	0.195577	0.176041	0.31108	0.194633	0.152199	0.244491	0.241261	0.192043	0.227507
gene:480	ATP1A4	0	0	0	0	0	0	0	0	0	0	0	0.00721465
gene:481	ATP1B1	106.685	126.468	120.681	143.673	128.548	137.001	150.157	160.383	164.148	145.39	145.647	143.47
gene:482	ATP1B2	0.027847	0.0167107	0	0.784783	0.5288	0.473361	0.40438	0.358743	0.49124	0.55659	0.411637	0.538037
gene:483	ATP1B3	100.791	110.298	106.165	95.6922	88.2902	87.3654	97.0647	93.1369	91.6254	87.6883	91.0672	90.0437
gene:91419	ATP23	0.351384	0.480136	0.616493	0.649523	0.797063	0.550108	0.608531	0.627475	0.472044	0.304189	0.295254	0.498695
gene:487	ATP2A1	0.398606	0.212798	0.334374	1.55009	1.86645	1.38121	0.964758	1.12356	0.96617	1.59897	1.56404	1.17819
gene:488	ATP2A2	53.792	58.853	54.1245	53.2301	51.2344	52.4893	51.0474	49.765	46.6823	51.8659	51.3808	49.5532
gene:489	ATP2A3	19.5289	25.1569	21.6784	18.6247	17.1217	19.4699	20.5841	21.1766	20.4328	18.2787	16.6742	17.8726
gene:490	ATP2B1	27.4263	27.3675	25.5658	31.0517	31.3173	30.2705	30.0624	31.5577	30.7343	31.1013	29.4581	26.5714
gene:491	ATP2B2	0	0	0	0.005162	0.00484939	0	0.021747	0	0.0140366	0.021993	0.0219281	0
gene:492	ATP2B3	0	0.0274757	0	0	0	0	0	0	0	0	0	0
gene:493	ATP2B4	9.92642	11.2936	9.5266	21.3432	23.9495	21.4534	25.4759	27.8456	30.3476	22.44	22.3673	22.9635
gene:27032	ATP2C1	14.7081	12.3449	12.58	11.3825	11.9138	11.2515	13.1255	13.4187	12.8461	12.4553	11.518	11.9092
gene:9914	ATP2C2	12.6004	13.2023	12.123	14.8267	15.5009	15.2813	16.8748	16.621	15.945	15.5609	14.648	15.994
gene:495	ATP4A	0	0	0	0.023551	0	0.0367407	0	0.0134234	0.0265769	0.085966	0.0146638	0.0304447
gene:496	ATP4B	0	0	0	0	0	0	0	0	0	0.064773	0	0
gene:498	ATP5F1A	198.002	208.051	206.246	191.008	171.329	172.736	181.99	174.628	175.017	176.269	179.165	187.464
gene:506	ATP5F1B	339.951	386.092	357.793	339.988	333.893	331.082	317.97	329.56	328.189	343.154	340.836	339.476
gene:509	ATP5F1C	129.248	129.047	118.633	125.687	116.622	103.707	122.012	121.653	121.112	108.295	112.839	110.569
gene:513	ATP5F1D	31.8848	32.0407	36.2742	31.6084	33.7897	31.3125	37.9961	31.0157	27.6801	34.1285	32.7576	33.7574
gene:514	ATP5F1E	8.49958	8.46319	8.50273	8.69179	8.05564	7.66951	7.84946	8.12789	7.61858	6.81488	8.054	8.28189
gene:93974	ATP5IF1	174.18	169.37	165.926	145.573	142.157	133.548	133.067	136.57	136.409	136.27	135.287	143.409
gene:516	ATP5MC1	37.841	41.0851	35.2309	32.5689	30.9951	26.8013	30.9546	34.0415	33.0873	34.4994	33.2952	28.9264
gene:517	ATP5MC2	95.5348	94.2248	97.748	87.8256	90.8443	79.9121	72.6681	58.544	59.1865	83.2968	85.9015	85.2925
gene:518	ATP5MC3	78.0988	100.377	74.4882	89.3464	72.8902	85.1048	76.7435	75.1898	76.9647	95.0508	90.9707	92.9934
gene:521	ATP5ME	61.7883	68.4208	56.68	48.3503	50.3416	48.5132	50.9364	49.7901	43.8736	48.4911	47.4392	48.3064
gene:9551	ATP5MF	108.233	135.671	131.923	94.2967	96.9333	97.3848	101.94	92.991	100.361	97.533	97.2903	89.9069
gene:100526740	ATP5MF-PTCD1	0.206209	0.168929	0.32513	0.687791	0.0747511	0.53347	0.404633	0.267957	0.242213	0.305034	0.200249	0.746497
gene:10632	ATP5MG	63.1401	64.3957	54.1853	61.5179	57.6324	56.5961	63.8604	68.4452	57.2423	48.0034	52.715	64.5356
gene:267020	ATP5MGL	0	0.0370343	0.0620418	0	0	0	0.04097	0.126737	0	0	0	0
gene:9556	ATP5MJ	55.4332	60.9585	61.9155	51.3886	52.63	47.8875	48.8524	51.8688	51.6219	52.4418	56.6912	50.9308
gene:84833	ATP5MK	91.6264	106.638	101.125	87.425	90.7265	82.6208	96.1614	87.5976	93.3367	89.91	85.2042	89.9327
gene:515	ATP5PB	55.6846	63.9145	56.5352	47.5788	45.9634	44.5163	43.4154	42.6613	44.5109	46.0938	47.3698	49.6067
gene:10476	ATP5PD	101.764	120.238	110.783	92.8236	93.3367	88.2703	102.304	100.648	104.376	89.2878	99.1015	92.9805
gene:522	ATP5PF	138.606	156.888	145.75	104.982	112.551	107.823	105.845	104.578	108.983	113.004	118.372	109.578
gene:539	ATP5PO	110.516	117.452	106.067	100.798	92.5531	92.4257	104.014	93.6016	105.767	98.1333	98.6687	96.6987
gene:537	ATP6AP1	107.601	117.049	81.7864	72.7496	71.5211	72.8079	96.3403	70.1063	84.1773	75.2499	82.6743	97.1335
gene:10159	ATP6AP2	29.9275	26.6879	27.3495	33.1604	29.8869	32.0356	32.8855	31.761	33.1974	28.8203	28.8546	30.774
gene:535	ATP6V0A1	39.5753	42.4002	38.5992	45.2424	46.9843	45.5036	44.6604	45.5208	44.8132	45.4894	43.8067	42.0737
gene:23545	ATP6V0A2	3.61259	4.52796	3.85085	7.94377	8.39203	7.63215	7.61105	9.53389	8.13844	9.12496	7.913	7.56376
gene:50617	ATP6V0A4	0	0	0	0.050502	0.0148589	0	0.012188	0	0	0.023411	0	0
gene:533	ATP6V0B	51.5385	61.928	51.6957	102.977	100.358	93.105	96.1486	90.5437	99.2684	103.331	101.383	101.201
gene:527	ATP6V0C	201.991	225.419	210.687	221.355	225.514	225.206	219.273	230.776	203.735	230.37	210.764	239.367
gene:9114	ATP6V0D1	61.1919	69.0994	64.2901	74.2818	76.1288	75.3852	76.1059	80.8583	69.3531	80.7023	72.4295	81.6786
gene:245972	ATP6V0D2	0	0	0	0	0	0	0	0	0	0	0	0
gene:8992	ATP6V0E1	80.8633	78.9676	76.8308	71.6183	68.5298	76.4446	75.1118	64.8406	69.1879	69.392	70.3421	70.0748
gene:155066	ATP6V0E2	0.821833	1.35495	0.716669	0.779512	0.709549	0.7043	1.31581	1.00028	0.970737	0.785253	0.973166	1.00721
gene:523	ATP6V1A	18.5849	16.9979	17.7539	22.5728	24.4859	23.6474	23.7884	25.0416	24.9876	22.208	23.4044	20.5216
gene:525	ATP6V1B1	0	0.0741392	0	0	0	0	0	0.0278958	0	0.148966	0	0.0199803
gene:526	ATP6V1B2	69.4094	66.2325	67.4972	68.0668	65.837	65.2845	67.9237	68.3612	68.6689	70.951	68.5537	68.972
gene:528	ATP6V1C1	9.9899	9.73505	8.52292	9.00029	9.67349	9.32295	9.57498	8.69817	9.41618	9.06324	9.05797	9.07435
gene:245973	ATP6V1C2	0.509773	0.647653	0.796892	1.41067	1.58027	1.6415	2.42014	2.53063	2.60945	2.18558	1.84665	1.69382
gene:51382	ATP6V1D	35.0375	31.2968	30.8532	51.7346	47.9974	46.6887	58.3717	59.0472	53.2827	48.8143	52.2295	55.7571
gene:529	ATP6V1E1	36.3131	42.2878	38.6272	65.8818	58.3529	60.7139	69.0924	62.6804	65.7541	63.9834	60.4545	59.7077
gene:90423	ATP6V1E2	0.556332	0.0578703	0.141139	0.093112	0.182277	0.048508	0.246748	0.270963	0.186204	0.571282	0.307345	0.126501
gene:9296	ATP6V1F	72.237	78.6856	80.2459	75.6127	69.5247	74.1531	69.0805	72.1203	64.2812	71.8696	67.0077	80.0745
gene:9550	ATP6V1G1	52.2395	44.8818	51.902	64.0716	65.4452	67.2443	63.9667	67.2228	61.7604	57.0888	61.9499	60.9769
gene:534	ATP6V1G2	0.120762	0.240392	0.360544	0.180935	0.707223	0.204774	0.371745	0.270261	0.319354	0.280088	0.271692	0.235621
gene:51606	ATP6V1H	17.4422	17.8252	16.6125	17.9945	19.1818	18.2999	16.9196	17.5558	16.7313	19.0472	18.1534	18.32
gene:538	ATP7A	2.90631	2.89727	2.40722	3.04515	2.84904	3.00993	3.84154	3.93787	3.01953	3.03253	3.64441	2.98637
gene:540	ATP7B	13.8017	13.7388	15.2638	8.74531	7.9728	7.57523	7.54837	7.87182	8.5713	8.13393	7.84372	8.50286
gene:10396	ATP8A1	27.92	23.8124	25.8083	18.1085	18.0616	17.2235	18.1826	18.5912	17.3938	16.7531	18.7061	15.3618
gene:51761	ATP8A2	0.01628	0.00308282	0	0.037757	0.0485098	0.0247268	0.042225	0.029442	0.0245064	0.055426	0	0.0102112
gene:5205	ATP8B1	44.9621	42.8471	44.7114	40.419	38.9417	39.6414	38.4952	39.8913	38.9285	38.7401	39.7106	39.6136
gene:57198	ATP8B2	0.025143	0.0585342	0.0409055	0.284754	0.236082	0.20951	0.200697	0.339518	0.248936	0.227951	0.197938	0.303892
gene:148229	ATP8B3	0.044346	0.0802322	0.0649965	0.248703	0.321271	0.416422	0.160695	0.207509	0.271169	0.277187	0.228288	0.233501
gene:79895	ATP8B4	0.233212	0.230726	0.121168	0.176091	0.0809794	0.0989014	0.051202	0.157303	0.172136	0.093744	0.0611632	0.0565522
gene:10079	ATP9A	16.1361	18.3952	16.4681	6.83499	5.73849	5.95068	6.79236	7.64185	7.67759	5.80504	5.89909	6.2739
gene:374868	ATP9B	4.5309	5.58169	4.7226	3.99835	4.05377	3.59649	4.23453	4.32985	4.12074	3.69806	3.59773	4.30245
gene:64756	ATPAF1	7.21083	7.00321	6.38645	4.67591	4.41231	3.6483	4.77643	5.44088	4.63803	4.02057	3.77301	4.36497
gene:91647	ATPAF2	9.53501	9.39104	10.2061	17.9095	16.6628	17.0618	18.0432	16.7093	16.8911	18.9123	18.0334	16.1044
gene:134145	ATPSCKMT	3.00271	3.05848	3.04448	2.50508	2.55323	2.20427	2.45736	2.59924	2.20941	1.71138	1.91977	2.01265
gene:545	ATR	1.03241	1.52592	1.56233	2.40907	2.3936	2.28726	2.90711	3.07888	2.63592	2.58624	2.12188	2.17911
gene:51374	ATRAID	52.2199	54.3766	51.0294	39.8963	37.5006	37.4221	36.9251	37.0218	36.0454	36.9717	36.8833	38.6048
gene:84126	ATRIP	0.925829	1.36478	1.06055	1.34881	1.16662	1.21417	1.50602	1.55262	1.38656	1.40915	1.43398	1.44505
gene:8455	ATRN	8.95896	9.24633	8.56844	9.29307	9.13899	8.54324	8.52532	8.90857	8.63312	9.23256	8.27989	8.32996
gene:26033	ATRNL1	0.105437	0.137885	0.15904	0.52875	0.469924	0.162276	0.181101	0.650561	0.213703	0.223364	0.231327	0.123468
gene:546	ATRX	7.14154	5.67378	6.50078	5.51195	5.15601	5.19739	3.8638	4.01171	4.44982	5.09825	6.02252	5.10092
gene:6310	ATXN1	7.73402	7.34727	6.65311	9.2216	9.59181	9.5428	7.07854	7.51984	8.24974	8.30722	8.78314	7.77976
gene:25814	ATXN10	8.5169	8.42782	8.45106	5.49397	5.92549	4.97269	4.75883	4.81178	4.4504	5.29274	5.39023	4.63731
gene:342371	ATXN1L	7.9371	8.057	7.76016	14.4318	14.3708	14.5024	12.2439	11.6179	11.3327	14.3741	14.1325	13.7727
gene:6311	ATXN2	14.2077	11.9289	13.3025	11.2446	12.2165	11.0917	10.7802	13.4693	10.0104	10.9802	11.0448	12.1145
gene:11273	ATXN2L	50.8123	46.8523	44.0906	35.5345	36.1832	43.7724	34.6639	39.7532	36.3021	40.3038	38.3715	39.3048
gene:4287	ATXN3	2.21202	1.91672	2.15313	2.13063	2.43803	2.45581	2.51976	2.23301	2.45837	2.36667	1.59059	1.50397
gene:6314	ATXN7	6.20573	8.44252	6.41808	8.73169	8.96067	9.20411	10.2822	6.10941	7.15924	7.61401	7.09175	5.07197
gene:222255	ATXN7L1	2.67634	2.4075	2.85556	1.73591	0.745109	0.883209	0.805011	1.41324	0.824266	0.943328	0.727318	0.73361
gene:127002	ATXN7L2	1.52888	1.06121	1.35163	0.276839	0.30808	0.450867	0.201385	0.321111	0.214269	0.318633	0.383196	0.25485
gene:56970	ATXN7L3	20.6024	22.875	20.5699	14.5513	16.2927	16.5148	15.6378	14.6331	15.7427	16.5569	15.437	16.6261
gene:552889	ATXN7L3B	13.188	14.2234	12.8723	8.38677	8.60209	7.63557	8.9242	9.19113	8.46964	8.41279	8.39619	8.80246
gene:549	AUH	12.8527	12.586	11.6112	11.283	10.7062	11.4536	12.9529	11.2086	11.8633	11.8941	11.6821	10.9934
gene:79000	AUNIP	0.119911	0.149415	0.129084	0.889434	0.78836	0.361833	0.440872	0.835209	0.634285	0.798679	0.645619	1.04499
gene:550	AUP1	73.1691	76.2561	71.8744	76.1537	73.9587	71.1935	82.1311	74.4534	67.4951	76.9442	73.6974	79.8708
gene:6790	AURKA	7.30542	6.7367	6.25726	6.71202	6.70396	6.41768	5.42558	6.70821	5.98691	6.41669	6.75688	6.82356
gene:54998	AURKAIP1	47.5218	54.567	47.5136	42.467	47.696	47.8738	47.9828	44.0031	47.3808	47.2416	48.6863	50.5777
gene:9212	AURKB	2.35413	2.82222	2.97165	2.48851	1.75575	2.02127	2.14535	1.60195	1.90348	2.30861	2.55791	2.23432
gene:6795	AURKC	0.222601	0	0.21186	0.730852	0.136242	0.409299	0.239703	0.314233	0.141863	0.26487	0.291753	0.0896815
gene:26053	AUTS2	10.7146	10.0861	10.8982	7.16496	6.91893	7.71387	7.48529	7.62458	8.72078	7.88202	7.24147	8.55972
gene:57099	AVEN	3.85281	4.76335	3.97451	1.54111	1.50614	0.990882	1.19095	1.22209	1.154	1.8717	1.29272	1.00437
gene:10677	AVIL	1.6685	2.39705	1.52827	1.39772	1.29888	1.29674	1.3345	1.74459	0.864166	1.50643	0.763598	1.01833
gene:23080	AVL9	16.3779	14.7276	17.0682	9.11542	8.51974	8.63566	9.19755	11.1591	11.2914	8.6302	10.0572	9.09632
gene:551	AVP	0	0	0.0886845	0	0	0	0	0	0	0	0	0
gene:60370	AVPI1	21.0173	25.3749	24.3281	37.6092	36.0966	37.2607	29.749	33.3451	34.3638	37.5138	36.3868	37.6113
gene:552	AVPR1A	0	0.0170188	0	0	0.00913294	0.00621217	0	0	0	0.008747	0.0142956	0
gene:553	AVPR1B	0.007672	0.0137368	0.0109585	0	0.011307	0	0	0	0	0	0	0
gene:554	AVPR2	0	0	0	0.204365	0.303401	0.246655	0.036194	0.116412	0.0254827	0.367769	0.0784322	0.117462
gene:158833	AWAT1	0	0	0	0	0	0	0	0	0.0286098	0	0	0
gene:158835	AWAT2	0	0	0	0	0	0	0	0.0260118	0	0	0	0
gene:126859	AXDND1	0.029973	0.282401	0.124222	0	0.0645302	0	0.029109	0.0118049	0.0252865	0.290864	0.350726	0.0459119
gene:8312	AXIN1	23.2446	24.8077	25.881	17.5599	18.5937	18.4269	15.0846	15.1563	13.1962	19.3564	17.1	18.9733
gene:8313	AXIN2	2.59133	2.23087	2.6723	1.66386	2.17736	1.5963	1.99271	1.75674	2.03081	2.21487	2.14733	2.14348
gene:558	AXL	0.310407	0.242441	0.185894	0.391305	0.171069	0.227168	0.311949	0.265263	0.162497	0.257595	0.157783	0.102131
gene:563	AZGP1	3.66973	4.27987	4.84015	4.07996	4.10849	3.71629	3.01428	2.99945	3.12787	3.68758	4.21545	3.26352
gene:64343	AZI2	7.36652	8.37554	7.23674	4.43314	4.51912	4.50967	5.25684	4.99891	4.87419	6.01785	4.81176	5.30529
gene:51582	AZIN1	21.5328	19.2843	20.6041	26.2794	27.3435	25.9615	29.3049	30.6344	29.6944	24.7006	25.0541	23.9366
gene:113451	AZIN2	0.576858	0.934708	0.450243	3.93922	2.49984	4.48962	4.10666	4.05592	4.91136	3.75795	2.88735	3.62541
gene:566	AZU1	0	0	0.0320686	0	0	0	0	0	0	0	0	0
gene:567	B2M	915.822	928.47	902.116	959.873	991.396	926.69	989.75	992.614	1042.35	970.683	999.774	931.58
gene:8706	B3GALNT1	0.045634	0.00913333	0.0355179	0.018523	0	0	0	0.0332535	0	0.018531	0.0492104	0
gene:148789	B3GALNT2	3.87724	3.90057	3.61228	8.08839	8.6103	7.23514	9.40694	9.28891	8.73877	8.23848	8.19858	7.34855
gene:8708	B3GALT1	0.046381	0.0218546	0.0489023	0.029548	0.0220491	0.0171225	0.024324	0.00918106	0.0283478	0.013486	0	0.00895971
gene:8707	B3GALT2	0.397276	0.485816	0.423754	0.082827	0.0681933	0.0981059	0.028321	0.107414	0.0309529	0.217272	0.165477	0.0587243
gene:8705	B3GALT4	9.84937	10.3663	9.48766	1.44224	1.48927	1.2102	1.80568	1.45081	1.55846	1.43267	1.33796	1.05829
gene:10317	B3GALT5	57.0735	54.759	53.6803	12.5109	9.24428	8.32124	7.01077	9.02965	12.8521	15.6223	14.3812	10.2005
gene:126792	B3GALT6	6.37017	6.72669	6.71252	4.20234	4.1426	4.44426	4.82691	3.45562	3.47595	4.59166	4.32987	5.10652
gene:100288842	B3GALT9	0.514943	0.535395	0.657179	0.421825	0.253156	0.156875	0.651296	0.878966	0.546801	0.169548	0.145379	0.209426
gene:27087	B3GAT1	0.142736	0.25717	0.0779255	0.180581	0.147918	0.246244	0.226306	0.168822	0.178944	0.244116	0.141941	0.145721
gene:135152	B3GAT2	0.091089	0.175023	0.126234	0.162568	0.173953	0.205804	0.158474	0.161394	0.120999	0.080104	0.159779	0.0183366
gene:26229	B3GAT3	9.44377	8.05174	8.88415	13.0967	13.7544	13.8934	15.602	15.0875	12.8727	13.777	12.6975	13.2627
gene:145173	B3GLCT	1.17264	0.667119	1.09827	0.395443	0.415343	0.496169	0.359407	0.499318	0.371032	0.384671	0.296957	0.195651
gene:10678	B3GNT2	9.52555	9.3529	9.02465	18.82	17.8459	17.0043	14.8253	14.4308	14.77	17.3137	15.7841	14.9969
gene:10331	B3GNT3	116.28	126.285	120.467	30.4184	29.2302	28.0603	27.7285	25.2447	25.8265	29.1619	29.6331	27.6638
gene:79369	B3GNT4	0.141375	0.0366484	0.0505594	0.59217	0.361684	0.177154	0.410207	0.840854	0.403827	0.32185	0.299903	0.363554
gene:84002	B3GNT5	18.1884	14.4944	15.3153	13.8395	13.9929	13.6774	11.6595	11.799	10.7757	13.0786	13.4235	11.4562
gene:192134	B3GNT6	2.89639	4.62161	3.75427	0.144752	0.087029	0.169432	0.169641	0.39616	0.215496	0.208067	0.137587	0.228856
gene:93010	B3GNT7	5.48914	5.42556	5.8061	5.19784	5.24146	4.73571	3.59727	3.82207	4.3113	5.14981	5.03536	4.83178
gene:374907	B3GNT8	31.9167	34.0593	30.9048	13.2093	14.4617	11.5718	12.8319	13.1418	12.8058	11.5292	12.2582	13.635
gene:84752	B3GNT9	1.12724	1.30572	1.16463	1.73791	1.53807	1.4544	1.21797	1.17744	1.03002	1.37602	1.36157	1.38739
gene:146712	B3GNTL1	0.156957	0.334643	0.136699	0.130933	0.0927281	0.241288	0.277935	0.330103	0.328305	0.322531	0.209377	0.158349
gene:2583	B4GALNT1	0.029455	0	0	0.053677	0.0249697	0	0.123103	0.0348234	0.127112	0.005644	0.135466	0.0566942
gene:124872	B4GALNT2	1.4019	1.67156	1.7313	1.50526	0.665475	1.04054	0.834217	0.498759	0.576281	0.931781	0.658904	0.751703
gene:283358	B4GALNT3	13.1799	18.2439	15.6591	16.6353	16.5809	16.2447	19.996	20.5645	19.966	17.5548	16.4857	18.2456
gene:338707	B4GALNT4	0.569783	0.536899	0.565205	2.17558	2.30845	2.08273	1.594	1.43042	1.4244	2.4556	2.16847	3.08484
gene:2683	B4GALT1	41.6266	45.0142	41.2941	53.8931	54.4284	51.901	48.4979	51.2071	53.54	50.6599	50.497	49.3562
gene:8704	B4GALT2	9.91656	14.1273	11.7678	6.28892	5.76761	6.00599	6.54623	7.50025	6.58122	6.28049	5.23997	6.32322
gene:8703	B4GALT3	14.6426	14.3479	14.3136	20.1677	19.8057	19.6486	19.6818	20.2839	18.126	20.9984	19.5542	21.7947
gene:8702	B4GALT4	19.4165	18.0134	17.9572	10.1465	10.6128	10.6138	9.19263	10.3798	9.80979	9.843	10.5463	9.10752
gene:9334	B4GALT5	26.0469	30.3674	26.0166	21.345	21.3789	19.6448	21.3753	20.355	20.8612	21.9499	20.5105	20.1493
gene:9331	B4GALT6	3.72984	4.23499	3.37649	3.03334	3.77961	3.68878	3.28301	4.65716	4.21549	3.44799	3.50733	3.1433
gene:11285	B4GALT7	5.41805	6.27682	6.43662	3.92992	4.44004	4.64561	5.45564	6.08935	5.31111	4.49051	4.11505	4.25841
gene:11041	B4GAT1	11.4779	12.1076	12.8213	4.2631	4.79836	4.03367	5.30458	4.32139	4.54952	4.27046	4.44337	4.72997
gene:27077	B9D1	1.80914	3.64078	3.2138	2.8821	2.12445	1.85261	3.36861	2.18467	3.13349	2.85481	3.06965	1.8894
gene:80776	B9D2	2.32936	2.55417	2.58589	0.706182	0.992893	1.11176	0.644755	0.748587	0.691774	1.40805	0.568821	1.14226
gene:79870	BAALC	0.2769	0.467228	0.302345	0.062654	0.151298	0.168922	0.10294	0.0336398	0.0798255	0.020513	0.120609	0.162332
gene:570	BAAT	0.073398	0.0274954	0.17014	0.105003	0.101201	0.195308	0.043076	0.0260089	0.076769	0.125972	0.209363	0.0846728
gene:29086	BABAM1	33.2988	36.375	30.222	37.1244	33.0905	35.5667	41.5987	38.3437	37.2317	38.726	33.5611	39.1483
gene:9577	BABAM2	7.22333	7.98526	7.04742	6.37497	6.76	5.76436	6.31454	6.92677	5.98804	6.70953	6.75086	5.4171
gene:23621	BACE1	8.75514	8.39376	8.83732	13.4592	11.614	12.5596	13.9523	12.7413	12.1371	13.5826	11.7248	14.0608
gene:25825	BACE2	2.85004	6.1413	6.0703	4.46196	5.20838	7.63708	4.9081	5.50005	5.03223	3.92419	7.70024	5.83382
gene:571	BACH1	15.9025	13.869	14.0308	12.1033	13.2294	11.9418	12.212	14.0269	12.3824	11.8703	13.2602	10.8012
gene:60468	BACH2	0.277774	0.329287	0.296982	0.976261	0.992846	0.995014	1.1121	1.08886	1.34724	0.926844	1.01918	0.755354
gene:572	BAD	15.9524	18.5506	17.2166	21.8313	26.9653	21.3436	22.9451	22.5155	26.3534	23.3108	24.5259	24.7521
gene:573	BAG1	16.8666	18.0428	18.609	15.957	14.4122	13.6519	15.9532	13.7272	14.9297	15.4337	12.5013	18.5864
gene:9532	BAG2	0.817377	0.680877	0.830159	1.10279	1.45965	1.31499	2.04724	1.75438	1.76044	1.40907	1.17983	1.5191
gene:9531	BAG3	16.1767	16.5785	14.5465	30.8368	31.198	32.6108	31.7872	25.6075	24.5492	33.8494	31.02	34.5738
gene:9530	BAG4	3.32314	2.71588	3.05653	6.01768	6.18042	6.32467	5.85908	5.83583	5.57236	6.39776	6.59503	5.23297
gene:9529	BAG5	6.49482	6.65472	6.44404	14.5355	13.3699	13.1043	12.3029	11.4147	11.8851	14.686	14.304	12.7131
gene:7917	BAG6	81.378	89.4054	89.6548	59.0127	56.8454	57.2817	64.4209	61.4729	57.8429	60.7854	53.6017	62.8679
gene:57597	BAHCC1	4.88995	5.25293	5.25808	3.07054	3.02118	2.90206	3.13724	3.29229	2.7185	3.31974	2.88254	3.3633
gene:22893	BAHD1	15.6269	16.4524	14.7741	18.0788	17.1587	16.6882	18.1571	16.5635	15.6232	17.6021	16.6702	18.1555
gene:10458	BAIAP2	4.74066	4.7726	4.1082	27.4998	27.1761	27.3423	23.5297	23.1054	22.6684	26.8621	26.1631	29.0972
gene:55971	BAIAP2L1	32.6157	34.1758	33.2099	49.9775	51.7193	50.5842	47.7171	45.5643	46.2	50.954	49.5664	46.8795
gene:80115	BAIAP2L2	89.6631	100.855	97.2298	55.6629	54.7027	56.8691	66.4343	64.9265	56.478	57.1297	51.9041	59.2345
gene:8938	BAIAP3	6.23652	7.88737	7.05744	12.3603	13.0805	15.7906	13.399	10.7244	12.5017	14.1541	12.0743	13.8835
gene:578	BAK1	5.778	7.40902	6.71394	14.0013	13.6638	13.8927	13.0607	11.4073	13.0037	15.0517	13.8123	14.8952
gene:25805	BAMBI	10.3577	14.1365	12.7916	11.9738	13.1053	12.5882	11.2776	12.0378	15.3837	15.5327	15.2093	15.2715
gene:8815	BANF1	42.2953	49.1716	46.3724	32.114	33.2634	33.0639	32.6423	32.8998	31.2351	31.5028	30.7091	37.0823
gene:55024	BANK1	0.037432	0.0315066	0.0587708	0.029494	0	0.0711728	0.009611	0	0.0157573	0.01211	0	0.02339
gene:54971	BANP	8.44571	10.5268	9.39604	6.27604	6.9043	7.90837	6.2701	6.77165	7.71218	8.41359	7.08997	7.06824
gene:8314	BAP1	17.5441	16.9607	16.9196	20.3386	20.1398	21.0761	17.9903	17.1758	17.1993	20.7559	19.3735	19.9531
gene:580	BARD1	0.305582	0.299004	0.267796	1.76202	1.79372	1.81291	2.09126	1.94127	1.48069	1.66768	1.69742	1.72981
gene:56751	BARHL1	0	0	0	0.016341	0	0	0	0	0	0	0	0
gene:343472	BARHL2	0	0	0	0	0	0	0	0	0	0	0	0
gene:56033	BARX1	0	0	0	0	0	0	0	0	0	0	0	0
gene:8538	BARX2	1.68796	2.36163	2.22828	2.33916	2.27465	2.30484	1.93305	2.45411	2.50725	2.99808	2.6852	2.30636
gene:10409	BASP1	0.156028	0.215007	0.0981491	0.687034	0.904647	0.480717	0.365666	0.574964	0.523095	0.84796	0.875766	0.781149
gene:10538	BATF	0	0	0	0	0	0	0	0	0	0	0	0.0610713
gene:116071	BATF2	5.16301	7.32194	5.76861	3.31503	4.57842	3.20618	6.22384	4.87618	4.86708	4.3431	4.34253	4.92353
gene:55509	BATF3	0	0	0	0.016724	0.0723289	0	0.023924	0	0	0.014489	0	0
gene:581	BAX	75.7799	68.7613	74.8009	45.3604	42.8014	41.4491	48.8662	45.7198	47.2101	43.1239	37.953	44.0221
gene:11177	BAZ1A	8.77193	8.11456	8.31651	7.46036	7.65281	7.16546	7.65186	6.93752	6.82917	7.11062	8.27107	5.66783
gene:9031	BAZ1B	13.1858	12.7998	12.0523	12.6981	11.8502	12.0258	11.0324	11.379	12.589	12.9266	12.6438	11.9679
gene:11176	BAZ2A	29.6353	28.5681	27.464	27.3553	25.1416	25.7346	24.026	25.7109	25.3566	28.1568	26.7148	26.0052
gene:29994	BAZ2B	8.47643	8.23749	8.84069	5.12294	5.39428	4.54776	4.13472	5.14475	4.41392	4.88681	5.8293	3.6733
gene:27113	BBC3	11.9808	17.7388	14.1256	31.497	34.2949	34.294	35.4184	38.6275	37.0499	34.8276	33.274	38.5552
gene:92482	BBIP1	3.06749	3.22354	2.11452	2.77655	2.48774	1.90532	2.57014	2.85708	4.49025	2.34506	2.35982	2.50398
gene:79095	BBLN	9.26154	8.86833	7.53885	12.6454	10.8255	11.6977	11.556	10.1432	9.37485	8.85794	9.69837	12.4167
gene:80127	BBOF1	1.10173	0.887817	0.87877	0.986214	1.43087	1.37186	1.98762	1.29424	1.29021	1.47322	0.973614	1.59409
gene:8424	BBOX1	0.026075	0.0488345	0	0	0.0540263	0.0986616	0.221311	0.0748936	0.0624085	0.061026	0	0
gene:582	BBS1	6.60053	6.78458	7.19027	7.1161	6.14886	7.49105	7.92436	7.60536	5.96839	6.60433	6.62411	6.81254
gene:79738	BBS10	1.36976	1.33813	1.62875	1.14751	1.18329	0.833259	1.53344	1.65247	2.03806	0.832225	0.679825	1.29764
gene:166379	BBS12	2.90789	2.29547	2.79508	2.56615	2.49781	2.14675	2.42496	2.38577	2.67581	2.19528	2.49461	2.44146
gene:583	BBS2	6.23923	8.49892	8.14854	4.30081	4.90322	4.99803	4.33331	5.55857	5.25504	4.54024	4.67177	4.85836
gene:585	BBS4	3.33	2.99414	3.05721	2.85485	2.92479	2.90526	4.86224	3.90618	3.75979	3.00981	2.07289	3.83183
gene:129880	BBS5	0.781943	1.04569	0.939772	1.75447	1.32452	1.99356	2.43473	2.09807	1.89862	1.85627	1.4099	1.70708
gene:55212	BBS7	3.09681	3.34089	3.08676	5.24475	5.35536	5.04118	5.88438	6.38597	5.40674	3.98669	4.47081	3.91135
gene:27241	BBS9	1.50677	0.603622	0.489758	0.638182	0.726468	0.729422	0.537343	0.506453	0.397111	0.892368	0.732482	0.546615
gene:56987	BBX	2.98073	2.85235	2.66549	2.61145	2.90856	2.94735	3.32706	3.09281	3.40698	2.73118	2.78527	2.91747
gene:4059	BCAM	20.7519	22.7779	22.1235	29.0197	25.9267	29.6435	26.7934	26.2955	24.5085	31.0328	26.8321	32.2236
gene:63827	BCAN	0.553675	1.66474	1.60541	1.1156	1.2034	0.419053	2.34315	2.88749	2.41134	1.39368	0.668824	1.71278
gene:55973	BCAP29	11.3309	12.3629	12.683	9.61449	10.7289	9.46749	9.28038	12.6456	11.4558	9.14064	9.51536	9.0593
gene:10134	BCAP31	114.557	120.987	118.226	108.088	107.578	102.13	110.38	111.939	116.465	109.403	111.553	115.71
gene:9564	BCAR1	60.2364	62.2017	57.001	48.0316	47.8007	48.745	47.4814	41.147	39.1904	51.6202	50.3866	53.6295
gene:8412	BCAR3	12.3009	13.4704	13.6065	5.19748	4.73205	4.72681	4.84852	4.98634	5.45379	3.81811	4.63022	4.56183
gene:8537	BCAS1	18.4716	20.1442	18.3792	10.0425	10.075	9.99948	6.29974	6.7142	6.86864	9.89121	10.7966	8.16774
gene:10286	BCAS2	21.0113	20.7316	19.5203	26.1596	24.2404	27.4334	28.5236	25.176	27.6889	24.1773	25.5204	23.1774
gene:54828	BCAS3	1.09543	1.26099	1.51878	1.52803	1.5915	1.30863	1.18965	1.14072	0.998024	1.46731	1.65467	1.53798
gene:55653	BCAS4	0.827251	1.11892	0.539972	2.31856	2.10052	1.8092	2.31329	2.38309	2.56418	1.54497	1.4775	2.27183
gene:586	BCAT1	0.345986	0.298262	0.284561	0.331693	0.285248	0.190605	0.239441	0.362759	0.728036	0.330004	0.342227	0.272507
gene:587	BCAT2	19.7965	21.8442	20.7544	27.4899	26.8804	29.604	29.276	29.6129	29.5859	25.7163	24.9339	26.595
gene:56647	BCCIP	12.305	12.8491	10.671	27.9037	29.8731	25.304	26.6885	27.1721	25.9404	28.782	27.4183	26.4606
gene:144233	BCDIN3D	2.11592	1.93364	2.3519	1.8727	1.85864	1.61768	2.58903	1.89431	2.30959	1.81712	1.53655	1.80838
gene:590	BCHE	0	0	0	0	0	0	0	0	0	0	0	0
gene:593	BCKDHA	14.2334	14.3702	13.5166	17.9512	17.0925	19.6862	18.3711	15.8092	16.2885	18.7347	14.8996	16.9117
gene:594	BCKDHB	16.3798	15.2202	14.0307	17.1126	12.265	11.9383	13.1525	13.1984	13.5416	12.7459	12.4322	15.1132
gene:10295	BCKDK	12.9375	11.4642	12.9215	17.8987	16.4279	17.8017	20.7352	15.6227	16.1811	18.1474	15.869	18.0571
gene:8915	BCL10	16.8141	16.3397	15.2318	19.5399	18.8073	16.1683	16.02	16.5109	15.5435	17.9428	17.3752	17.0911
gene:53335	BCL11A	2.34	1.59774	1.95596	2.0825	2.08377	2.16984	1.9888	1.82009	1.62596	1.87882	2.00553	2.02117
gene:64919	BCL11B	0.853021	0.913196	0.916698	0.379323	0.383483	0.368271	0.310757	0.306201	0.277621	0.45212	0.369507	0.286812
gene:596	BCL2	0.277211	0.19509	0.155159	0.273455	0.316907	0.401799	0.296655	0.371044	0.309221	0.338226	0.32583	0.278921
gene:597	BCL2A1	0	0.0842569	0.075006	0	0.112203	0.0654403	0.086534	0.133504	0.111416	0	0	0
gene:598	BCL2L1	144.459	172.834	160.048	64.9007	64.3558	66.498	58.6568	62.3954	63.1204	67.7779	66.1909	65.4677
gene:10017	BCL2L10	0.314003	0.415593	0.605721	0.151315	0.168188	0	0.387834	0.183104	0.15402	0.100161	0.242213	0.187498
gene:10018	BCL2L11	1.83146	2.87791	1.90542	5.47466	4.71097	3.8301	4.6019	4.93552	4.50644	5.3933	4.78344	4.20595
gene:83596	BCL2L12	13.9234	12.3981	12.8729	46.4803	43.7792	48.1927	39.253	34.0745	34.882	46.2988	47	48.8872
gene:23786	BCL2L13	13.1945	13.1145	12.2127	9.16655	8.59294	9.54755	10.5969	10.8982	11.1439	9.31022	8.5967	8.77495
gene:79370	BCL2L14	16.4554	12.9978	15.3553	8.78377	7.95797	7.69199	4.68199	5.22101	4.94029	8.40015	8.25125	6.03272
gene:440603	BCL2L15	1.34928	1.05194	1.03663	0.892386	0.706246	0.872397	0.800209	0.606551	0.791212	0.728875	0.776024	0.672792
gene:599	BCL2L2	15.3115	16.2407	14.7706	19.3853	19.8054	18.2496	20.4254	21.4868	21.0033	19.301	19.9315	20.2669
gene:100529063	BCL2L2-PABPN1	3.95322	8.51722	9.41182	4.03235	9.41198	9.86093	4.78585	6.95399	4.29734	10.2345	7.66052	6.49557
gene:602	BCL3	13.7135	15.5969	16.5575	17.5657	17.8845	17.0268	18.194	17.1846	15.9879	20.2544	18.6057	19.3286
gene:604	BCL6	11.4039	10.42	11.49	33.1942	31.6931	33.3917	32.6743	36.8605	32.4301	35.6745	32.7704	33.4891
gene:255877	BCL6B	0.093621	0	0.0312435	0.053335	0.0948446	0	0.063561	0.0273768	0.105835	0.127806	0.053615	0.14522
gene:605	BCL7A	3.57029	3.46364	3.53763	4.39806	4.64772	4.61858	4.71205	5.23582	4.55186	4.29303	4.47595	4.33504
gene:9275	BCL7B	31.771	33.2349	35.3053	17.4992	21.2236	18.3671	19.0493	18.0934	17.4818	20.6003	19.1299	18.9555
gene:9274	BCL7C	14.2278	20.1683	17.3737	12.3652	10.7152	11.4189	10.8345	11.4437	12.6608	12.3208	9.6246	12.5637
gene:607	BCL9	8.08181	9.13324	8.80278	8.20004	7.77285	7.89629	8.60463	7.92572	8.65015	8.9212	8.24588	8.91249
gene:283149	BCL9L	14.32	16.293	15.8966	7.54808	8.57882	8.23747	10.3219	10.4508	8.44976	8.90103	8.5133	8.59802
gene:9774	BCLAF1	20.6275	16.4534	21.1494	13.5639	10.8438	10.6206	11.2946	9.99838	10.4146	14.0134	11.2016	10.2439
gene:731605	BCLAF1P2	1.08136	1.16583	1.31241	0.62797	0.78832	0.656032	0.573826	0.486702	0.675593	0.591009	0.529494	0.600292
gene:256643	BCLAF3	1.66833	1.71292	1.44433	0.660433	0.812615	0.758375	0.875957	0.943637	1.09094	0.673191	0.739673	0.801346
gene:53630	BCO1	5.2797	5.11366	5.46572	2.34082	2.73674	2.14959	2.71554	3.00714	3.01764	2.90911	2.22335	2.65495
gene:83875	BCO2	0.66304	0.442835	0.45224	1.88738	1.65347	2.17736	1.96499	1.64126	1.558	2.63015	1.94614	1.99408
gene:54880	BCOR	4.47619	4.77417	3.9141	4.54056	4.52182	3.87574	5.16991	5.01815	4.74035	4.6381	4.01338	4.42762
gene:63035	BCORL1	7.66441	7.10062	6.43568	7.14221	7.07898	7.03736	7.84595	7.0752	7.8893	8.95501	7.01997	7.01497
gene:613	BCR	11.1227	11.5622	11.4834	14.8697	12.9834	14.1846	14.2965	13.6484	12.7972	15.5512	14.5698	15.7355
gene:617	BCS1L	3.74183	3.79295	3.45573	4.83519	3.53416	4.01233	4.89424	4.84926	5.40399	3.17658	4.16523	3.869
gene:622	BDH1	23.8871	25.5729	25.2021	6.74554	6.29826	7.32482	8.94668	7.80291	7.49305	7.45483	8.59157	7.42771
gene:56898	BDH2	5.35914	6.44289	7.27634	6.0148	6.84572	4.50543	6.10983	5.83497	5.4735	5.61784	5.41549	5.84357
gene:623	BDKRB1	0.497637	0.781977	0.863991	1.43348	1.0955	0.830974	1.19714	1.43715	1.42787	1.6619	1.29796	1.0002
gene:624	BDKRB2	1.23013	2.08616	1.6345	1.43981	1.19477	1.16745	2.0189	2.76396	2.74918	1.72526	1.65172	2.11385
gene:627	BDNF	0.01442	0.0155552	0.0400805	0.004026	0.0391912	0	0.017934	0.0673964	0.020142	0.00885	0	0
gene:55814	BDP1	2.82957	3.28986	2.57493	1.49668	1.66327	1.48377	1.67298	1.77515	1.63779	1.55384	1.47895	1.70639
gene:146227	BEAN1	0.029632	0	0	0	0.0132358	0	0.025415	0	0.0144726	0.013009	0.0152414	0
gene:8678	BECN1	40.2709	40.7081	39.2391	28.8474	26.1333	28.6057	28.6407	31.9388	27.7564	27.6733	26.8131	26.5661
gene:57596	BEGAIN	0.221603	0.135886	0.184676	0.032311	0.038399	0	0.035916	0.0332624	0	0	0.0108045	0.0351823
gene:139105	BEND2	0	0	0	0	0	0	0	0	0	0	0	0
gene:57673	BEND3	1.16045	1.26844	1.08394	0.189405	0.27136	0.237788	0.240294	0.236622	0.320835	0.297384	0.222973	0.285524
gene:389206	BEND4	0	0	0	0	0	0.00564477	0	0	0	0	0	0
gene:79656	BEND5	0.126687	0.135363	0.175355	0	0.115763	0.0698089	0	0	0.0731015	0.032362	0.106426	0.2271
gene:221336	BEND6	0	0	0.0432608	0.061672	0.0118629	0.0558949	0.062656	0.0388538	0	0.034848	0.0356892	0.0215685
gene:222389	BEND7	10.3307	9.76483	8.78238	9.66572	10.1322	9.67423	8.26273	8.74898	9.06361	10.9018	10.4967	8.68957
gene:7439	BEST1	0.399459	2.01082	0.443389	0.297859	0.380424	0.453171	21.3711	17.0962	17.8284	0.577753	0.574508	0.580794
gene:54831	BEST2	0.458881	0.626258	0.306303	0.141985	0.0824109	0.0330311	0.235252	0.147502	0.175068	0.161229	0.0425413	0
gene:144453	BEST3	0	0	0	0.015441	0.016621	0.0195149	0.011512	0.0150092	0	0	0	0
gene:266675	BEST4	0.098473	0.258631	0.376622	0.150261	0.0462236	0.194052	0.350608	0.204464	0.220671	0.173324	0.235657	0.120677
gene:10282	BET1	12.3017	11.5251	12.2296	6.78741	7.27021	6.51223	8.71318	7.9639	7.47925	5.33579	6.81701	8.00282
gene:51272	BET1L	24.6217	24.5559	24.4108	18.5797	18.0488	18.6267	19.0795	17.0216	15.1547	20.2457	18.5062	18.7937
gene:55859	BEX1	2.92148	2.96171	3.5328	3.00998	2.34643	2.30734	2.10308	1.70988	1.57966	2.81755	2.53717	2.51136
gene:84707	BEX2	1.76077	1.49013	2.44297	4.55397	4.71218	4.78238	5.22106	4.43662	4.34745	3.24817	3.13387	3.62983
gene:27018	BEX3	25.1034	24.6647	24.538	27.5368	23.2856	28.2699	23.8729	22.5267	27.0653	25.4293	25.7817	24.102
gene:56271	BEX4	12.4075	12.1625	12.5869	9.83417	10.0612	8.95114	9.53379	10.1012	10.1681	7.88823	9.42854	8.13347
gene:340542	BEX5	0.162337	0.606926	0.566258	1.93136	2.10373	1.1215	2.13695	2.11431	2.24266	1.34352	2.15092	1.6694
gene:51283	BFAR	26.4656	24.2127	25.3202	21.4696	20.8545	21.7572	20.6358	19.3083	21.4624	20.6871	20.0867	19.7784
gene:631	BFSP1	1.48218	1.66903	1.87095	1.787	1.17544	1.20431	2.0794	2.37617	1.71719	2.00732	1.78958	1.60789
gene:632	BGLAP	0.340961	0.24577	0.179156	0.042848	0.248754	0	0.011444	0.109362	0.145605	0.188145	0.244504	0.0078652
gene:633	BGN	0.017289	0.01914	0	0	0	0	0	0	0.0236538	0.057591	0.0913249	0
gene:168620	BHLHA15	0.312669	0.46508	0.157442	0.529934	0.291034	0.253844	0.363424	0.182848	0.472952	0.347773	0.400983	0.32013
gene:727857	BHLHA9	0	0	0	0.063108	0.0817329	0	0	0	0.0311733	0	0	0
gene:128408	BHLHE23	0	0	0	0	0	0	0	0	0.0667913	0	0	0
gene:8553	BHLHE40	15.7824	20.2477	18.1566	6.59413	7.70467	6.8705	6.16892	8.7575	6.96357	6.55516	6.95822	6.62445
gene:79365	BHLHE41	1.77896	2.18688	1.95614	1.91694	1.39175	1.89522	2.53577	2.85701	2.40323	1.72365	1.95038	1.90364
gene:635	BHMT	0	0.0158477	0	0.101521	0.0831375	0.142225	0.0511	0.0636424	0.135048	0.331572	0.0246762	0.112857
gene:23743	BHMT2	0	0	0	0	0.0741783	0	0	0	0	0	0	0.0197072
gene:80114	BICC1	0.017685	0.0233722	0.0456997	0.027586	0.137817	0.00961365	0.093308	0.0837537	0.0370215	0.04829	0.137581	0.0613493
gene:636	BICD1	0.69657	0.889116	1.26428	1.66511	1.7209	2.22525	1.79633	3.92925	1.94848	2.19657	3.1068	1.98218
gene:23299	BICD2	2.84068	3.00158	2.45267	6.77935	7.92019	6.58639	6.56864	5.83454	6.0528	7.06442	6.40424	6.86315
gene:92558	BICDL1	2.72385	3.83012	3.31841	8.89022	8.34024	7.86577	9.19534	8.36257	9.11319	9.42547	7.64926	8.71877
gene:146439	BICDL2	28.8649	32.9672	28.5316	33.9928	35.5206	35.4876	40.6602	38.6188	37.8388	36.0077	32.5712	35.6136
gene:29998	BICRA	3.31979	4.06517	3.63602	4.7728	5.19112	5.4038	5.23282	5.18815	4.82127	5.80697	4.89037	5.13773
gene:23506	BICRAL	2.613	2.39216	2.8824	0.705044	0.831268	0.738165	0.727903	0.831841	0.827167	0.777137	0.778355	0.697951
gene:637	BID	7.81446	8.57856	8.52979	7.40307	7.3009	7.25232	9.82586	9.71357	10.6056	8.18027	8.48285	8.69798
gene:638	BIK	2.45582	2.36022	2.68706	18.774	18.0329	17.1365	16.0402	16.8438	18.3434	18.3581	19.2683	18.2028
gene:274	BIN1	33.6489	36.7868	34.6529	53.9701	53.4333	54.1086	59.2135	54.0257	53.5268	57.5238	54.3192	60.8159
gene:51411	BIN2	0	0.0401514	0	0	0	0	0.059671	0.0236188	0.0550668	0	0	0.0334164
gene:55909	BIN3	13.8914	16.966	13.4106	22.5856	19.7862	23.9696	22.8055	27.2526	21.1664	26.3908	22.8995	29.0439
gene:329	BIRC2	24.2354	19.1248	22.7916	10.9122	11.9091	11.2129	11.8894	11.6158	12.3489	11.6059	11.8834	10.8808
gene:330	BIRC3	3.12509	4.53915	3.97114	64.3903	72.7748	69.399	114.781	130.497	120.327	71.1222	81.7436	77.4925
gene:332	BIRC5	1.30633	1.63672	1.51425	0.808558	0.811861	0.689367	0.343754	0.602127	0.630337	1.23376	0.808558	0.765905
gene:57448	BIRC6	8.59645	8.32881	8.55124	5.70716	6.41503	6.21492	5.26152	5.34626	5.95697	7.18338	6.03568	4.54515
gene:79444	BIRC7	0.06222	0.0638939	0	0	0	0.0682549	0	0	0	0.020536	0	0.0179731
gene:54841	BIVM	4.9811	3.92486	4.86927	3.35186	2.28561	3.12874	3.94674	4.68428	4.26388	2.36376	2.54301	2.41506
gene:100533467	BIVM-ERCC5	1.3655	0	0	1.50896	3.72557	1.22857	0.643042	0	0	3.57868	3.31005	2.2712
gene:101669762	BLACAT1	3.8683	4.12402	4.16211	1.24551	1.15909	1.54296	2.49118	2.71155	2.41765	1.57697	1.63127	2.053
gene:10904	BLCAP	62.8666	68.4043	63.8326	55.2618	54.7358	52.399	50.4509	50.4102	52.2091	59.3576	56.0691	61.846
gene:641	BLM	0.143527	0.139257	0.178572	0.183045	0.146945	0.354007	0.322469	0.268755	0.258132	0.204723	0.188388	0.348625
gene:642	BLMH	4.44979	5.20047	5.03748	13.0211	11.1082	12.1282	10.8922	10.807	10.1271	12.6282	12.5963	10.796
gene:29760	BLNK	4.73857	6.30507	4.34804	1.4408	1.28076	1.45092	0.749609	1.20566	1.33621	1.24417	1.00794	0.892277
gene:2647	BLOC1S1	51.5612	51.5143	45.8283	38.26	37.6387	34.8293	45.1222	37.9792	34.8335	35.0588	33.2799	37.2006
gene:282991	BLOC1S2	7.12462	6.81679	7.12084	4.67096	4.85662	4.66696	5.03394	5.50083	5.92802	4.73724	4.45191	5.08332
gene:388552	BLOC1S3	5.57499	4.66859	4.17699	6.05923	5.2308	5.27627	5.33894	5.54015	4.79946	6.13557	5.26675	5.61383
gene:55330	BLOC1S4	10.5442	11.5822	10.6721	10.1126	6.87541	5.84892	6.07599	5.90675	8.05807	9.55077	9.19218	9.6709
gene:63915	BLOC1S5	5.24039	4.44108	5.37276	4.47193	3.06293	3.65492	3.93671	4.62433	4.34931	3.62039	4.32842	3.97553
gene:26258	BLOC1S6	13.8556	11.9471	12.1656	13.4711	14.9506	15.2299	15.2116	17.5724	14.8943	12.0519	14.8001	13.7346
gene:84162	BLTP1	9.38491	9.12698	8.99976	8.43878	12.6836	8.10172	7.53865	7.82837	8.2736	8.1637	7.93133	7.72715
gene:9703	BLTP2	16.3089	18.7355	18.9363	26.2326	25.8538	25.2034	25.9707	26.0443	24.4634	29.5344	26.2994	27.7481
gene:54887	BLTP3A	4.57756	4.69007	4.7281	1.77282	2.1648	1.80245	2.23509	2.39238	2.24554	1.77108	2.02809	1.9522
gene:23074	BLTP3B	4.70559	3.74991	4.36827	4.67322	4.13098	4.34049	3.83842	3.25042	4.43636	4.01036	4.03951	3.8592
gene:644	BLVRA	0.931098	1.36018	1.6807	8.80862	10.7312	11.8414	11.4172	12.9444	12.92	9.78143	9.04449	12.0357
gene:645	BLVRB	67.8159	68.6781	71.0683	76.1959	78.6745	71.5773	79.3728	80.4617	78.7245	78.2657	78.3405	87.281
gene:8548	BLZF1	7.75854	7.12538	7.54437	7.93739	9.06724	8.76843	10.7434	9.62854	9.4552	8.71959	8.7817	7.74338
gene:406	BMAL1	3.67669	3.86696	3.85518	11.8977	11.4481	12.4259	11.0816	11.7185	12.0463	13.2272	12.0225	10.874
gene:56938	BMAL2	2.92434	1.95123	3.11506	3.65413	3.73064	2.70507	3.79094	4.38449	4.87429	3.62356	4.14839	4.42963
gene:89927	BMERB1	0.087391	0.308991	0.198837	1.44241	1.40865	1.16516	1.06082	1.70561	1.73136	1.06457	1.10993	1.42879
gene:90427	BMF	4.31076	4.74659	3.40296	24.215	22.1027	22.367	25.6926	24.2466	25.9704	25.8697	23.2102	26.9493
gene:648	BMI1	7.23238	6.38873	7.89511	6.3043	7.09209	5.90707	6.31013	6.72916	7.28722	5.78542	6.37096	5.76279
gene:649	BMP1	17.9602	20.3436	18.741	13.4751	12.1501	11.2824	12.8354	14.3527	12.6439	11.683	11.366	13.2264
gene:650	BMP2	5.81764	6.03235	5.72232	25.386	25.4705	26.0043	23.5871	27.9408	27.9395	25.8913	25.0603	25.8813
gene:55589	BMP2K	8.66775	9.47725	9.09956	6.84069	7.20488	7.05576	7.51793	6.41832	7.01692	7.06585	6.84617	8.20786
gene:651	BMP3	4.37288	3.2737	4.19121	1.22844	1.16938	1.10915	0.716252	0.722877	0.719794	1.09389	1.35136	0.901582
gene:652	BMP4	21.9339	24.406	23.585	17.8292	16.0508	15.0234	16.4389	17.9761	16.2677	16.3384	15.3187	16.3979
gene:654	BMP6	0.014279	0.0283854	0	0.200655	0.22797	0.184779	0.336085	0.230542	0.232283	0.274727	0.290287	0.263786
gene:655	BMP7	6.31062	7.96305	6.20548	10.7738	10.6636	11.3629	10.1382	10.1598	10.8937	12.8055	11.4106	13.2798
gene:353500	BMP8A	0.5084	0.531696	0.49404	0.629104	0.779131	0.66809	0.76382	1.02734	0.900437	0.781656	0.578064	0.771255
gene:656	BMP8B	1.34463	1.5165	1.43553	3.91938	3.89403	3.29133	3.62862	3.56629	3.309	3.91309	3.64352	3.83164
gene:168667	BMPER	0	0	0	0	0	0	0.023587	0	0	0	0.0291229	0
gene:657	BMPR1A	7.02536	5.52801	6.45978	4.61199	4.85888	5.19347	5.58176	5.72593	4.21294	5.01077	5.0197	4.93809
gene:658	BMPR1B	1.34474	1.3013	1.03982	0.754346	0.87784	1.01606	0.977377	0.868637	0.843283	0.902814	0.902809	0.773444
gene:659	BMPR2	5.30748	4.47481	4.51253	3.94506	4.3469	3.70994	3.62559	4.01288	3.73958	3.67407	3.88077	3.57523
gene:9790	BMS1	5.01743	4.86205	4.99361	5.40843	5.62681	5.16718	5.39171	5.2453	5.33574	5.17926	4.9945	5.22387
gene:154743	BMT2	1.7154	1.54176	1.71789	4.2391	4.46166	4.48844	4.43563	4.05018	4.1452	4.18075	4.22607	3.61439
gene:660	BMX	0.169048	0.189468	0.183739	0.107357	0.140929	0.0925176	0.099126	0.0729502	0.0716738	0.158859	0.140273	0.114393
gene:646	BNC1	0	0	0	0	0	0	0	0	0	0	0	0
gene:54796	BNC2	0	0	0	0.00305	0	0	0.008864	0	0	0	0	0
gene:662	BNIP1	3.43696	4.24051	3.0645	3.08731	3.42266	2.28796	2.53492	3.63368	3.42348	2.70378	3.36939	2.61401
gene:663	BNIP2	11.4971	10.1727	10.6662	16.3333	16.6799	14.6943	14.9891	13.5523	14.3535	16.8542	14.9261	12.6352
gene:664	BNIP3	8.77126	9.21688	10.0014	17.1792	16.7689	16.7464	17.4812	18.9428	16.6975	18.4198	16.9889	17.6711
gene:665	BNIP3L	16.4145	14.3878	14.3384	24.1764	24.2977	24.235	27.9341	26.8141	25.9999	22.666	23.9288	25.0468
gene:389384	BNIP5	8.30615	11.297	10.212	61.4312	61.8479	61.1506	86.3022	99.804	92.0593	58.2864	59.7322	69.4433
gene:149428	BNIPL	0.148447	0.167209	0.0664875	0.47142	0.155332	0.074235	0.409362	0.35828	0.278429	0.245514	0.318066	0.156737
gene:91653	BOC	0.018041	0.0159888	0	0.025615	0.0322333	0.101872	0	0	0.00964711	0.077932	0.0388749	0.00969667
gene:91272	BOD1	10.4134	9.96777	10.3657	11.7162	9.12255	10.051	7.55577	8.80572	10.1034	8.80908	8.77584	9.32948
gene:259282	BOD1L1	6.0368	5.7274	5.62278	9.39608	9.70221	9.53097	9.83991	9.2277	9.46807	9.4621	8.5222	9.50892
gene:666	BOK	3.46054	3.86498	3.85954	3.19997	2.72873	2.98077	3.5996	2.91944	3.65597	3.12357	2.81778	3.65334
gene:51027	BOLA1	3.69334	4.86862	4.48431	1.56812	1.76315	1.99879	1.44278	1.96945	1.07243	1.75782	0.551652	2.08442
gene:552900	BOLA2	9.58511	9.34968	9.53588	10.7694	9.50015	10.3499	11.2502	9.98226	10.2362	8.00111	10.0094	9.69982
gene:654483	BOLA2B	9.97939	12.851	11.4863	15.6015	10.7345	10.2745	14.1736	13.0099	13.9686	11.3146	12.2876	15.8111
gene:107282092	BOLA2-SMG1P6	9.22341	10.732	10.0099	12.0116	11.7413	10.1927	11.8989	10.515	10.4215	10.0186	9.00686	11.1029
gene:388962	BOLA3	7.15131	9.70014	8.96457	6.78798	7.66543	7.60414	7.39756	9.6108	10.5476	7.16922	8.95119	5.87196
gene:66037	BOLL	0	0	0	0.05209	0.0319027	0.0249569	0.012434	0	0	0.014331	0.0327825	0.0280422
gene:23246	BOP1	13.8932	16.4377	18.7165	23.4079	22.8195	25.5187	26.0326	21.6767	21.4075	28.0285	22.5399	26.7978
gene:79866	BORA	1.11012	1.96748	1.53184	2.56586	2.46944	2.54316	2.12835	2.72633	3.22234	2.72596	2.14066	2.34457
gene:118426	BORCS5	1.8817	1.66663	1.61109	1.01421	1.28231	1.27239	1.44247	1.64849	1.36102	1.12852	1.48262	1.49943
gene:54785	BORCS6	12.8826	13.4263	13.5328	17.5272	17.7899	16.738	14.2218	12.8435	16.0858	19.61	16.3769	18.9933
gene:119032	BORCS7	8.02506	5.88128	7.14627	5.3808	4.85659	4.8108	4.47132	4.60681	4.49828	4.40095	4.71537	4.74831
gene:729991	BORCS8	5.06833	4.77448	5.0355	6.73355	5.26413	7.65238	8.15583	7.78292	7.3063	5.83931	7.26804	8.18749
gene:4207	BORCS8-MEF2B	0.823088	1.47257	1.73056	4.47729	4.46651	3.64151	2.76385	3.29002	3.87178	4.8709	2.87197	2.38633
gene:669	BPGM	1.50947	1.72322	1.83894	1.09264	1.5956	1.48356	1.94252	1.62677	1.44685	1.11017	1.76964	1.85888
gene:670	BPHL	18.2612	20.3987	19.3484	12.3363	11.3105	12.5242	16.5966	13.8906	17.0041	12.7777	12.1658	13.8421
gene:671	BPI	0	0	0	0	0	0	0	0	0	0	0	0
gene:92747	BPIFB1	0.9884	0.937993	0.473593	1.00743	0.441519	1.06755	0.684584	0.794179	0.955748	0.522951	0.593599	1.00485
gene:254240	BPIFC	0	0	0	0	0	0	0	0	0	0	0	0
gene:10380	BPNT1	30.8592	29.8095	30.498	46.1994	40.2691	39.7273	41.0472	39.5185	38.1044	39.6713	38.8322	38.5755
gene:54928	BPNT2	11.6655	10.4152	10.634	18.5563	19.2139	18.6353	17.4195	16.2748	16.0086	18.5867	19.675	16.2196
gene:2186	BPTF	10.2239	11.2601	9.4925	4.45385	4.2758	4.3831	3.52597	3.58805	3.16214	3.82963	4.41826	3.67214
gene:9083	BPY2	0.087543	0.289179	0.0742273	0	0.0391704	0.0153579	0.013598	0.0168298	0	0	0	0.0121747
gene:442867	BPY2B	0.087543	0.289179	0.0742273	0	0.0391704	0.0153579	0.013598	0.0168298	0	0	0	0.0121747
gene:442868	BPY2C	0.086276	0.197305	0.0742273	0	0.0378431	0.0153579	0.013598	0.0168298	0	0	0	0.0121747
gene:673	BRAF	3.17094	2.71598	2.98031	2.14199	2.27256	2.54089	2.19633	2.34516	2.08258	2.40269	2.01409	1.8974
gene:8315	BRAP	4.71678	4.94016	4.70327	4.30088	4.40778	4.45599	5.03435	5.59996	5.44763	4.83302	4.37588	4.57476
gene:221927	BRAT1	8.23218	8.8101	8.38737	14.5456	14.6037	15.6952	15.5027	16.0185	15.883	16.5566	13.3606	17.8213
gene:672	BRCA1	0.376458	0.449256	0.283971	0.54338	0.693232	0.812317	0.839862	0.728832	1.16956	0.399848	0.620434	0.704833
gene:675	BRCA2	0.061404	0.228015	0.0612409	0.056218	0.112021	0.0991207	0.142002	0.151176	0.112545	0.108945	0.104965	0.0859233
gene:79184	BRCC3	12.9972	10.0854	9.80852	10.3628	9.73491	9.11069	9.72566	9.38576	11.4404	10.1854	10.4581	8.38465
gene:23774	BRD1	11.9327	11.5944	11.7663	5.99562	6.02181	5.46906	6.37925	6.04094	5.40825	5.87129	5.77475	5.76708
gene:6046	BRD2	48.5884	48.7614	49.4759	40.3423	42.4486	40.9198	38.8153	35.4387	35.6837	44.5993	42.1461	43.857
gene:8019	BRD3	5.46458	5.08166	4.53644	5.71645	5.84942	5.80342	5.3755	5.86538	5.11866	5.93478	5.46734	5.14112
gene:266655	BRD3OS	1.55865	1.30118	1.32577	2.83238	3.33271	2.98773	3.639	3.63395	2.80874	2.57655	2.5837	3.37365
gene:23476	BRD4	14.2363	14.3134	13.8938	14.2544	13.9889	12.3835	14.1136	12.7921	13.8476	15.9663	14.2371	13.8939
gene:29117	BRD7	12.0984	12.9547	12.745	10.2094	10.7041	13.3029	16.5245	15.5488	13.7267	10.7716	13.2215	12.2609
gene:10902	BRD8	18.2978	17.294	16.6126	15.0359	15.1677	13.5645	14.8904	13.2442	12.8809	15.1957	15.1981	13.7771
gene:65980	BRD9	9.08665	9.30043	9.39987	6.26307	5.91332	5.81907	7.79058	6.68425	7.04208	7.66232	6.70959	7.28867
gene:676	BRDT	0	0	0	0	0	0	0	0	0.0177872	0	0	0
gene:2972	BRF1	5.19555	5.57983	6.57074	6.05102	7.41706	6.73489	7.05923	6.37088	6.24293	7.39305	6.66653	6.48762
gene:55290	BRF2	3.60544	3.7218	3.35281	2.84841	2.84255	2.91581	2.45721	2.57088	2.51025	2.63487	3.24026	2.97481
gene:25798	BRI3	72.6279	105.007	79.7276	54.4971	44.3047	41.5851	42.464	42.0028	39.2671	70.063	54.4571	49.1028
gene:140707	BRI3BP	13.5538	13.5613	13.2011	12.1074	11.3061	10.717	12.3259	12.6162	11.6847	12.6554	11.8044	11.3177
gene:283870	BRICD5	0.769145	1.57296	1.91014	3.47151	4.00251	3.91886	3.76897	2.24342	2.67728	3.0398	3.01829	3.27785
gene:1620	BRINP1	0.116077	0.117142	0.0662356	0.179204	0.0875343	0.070466	0.112556	0.0545901	0.0553646	0.092904	0.280201	0.156145
gene:57795	BRINP2	0.035185	0.169113	0.0552983	0.14831	0.108927	0.307545	0.161048	0.0925614	0.183373	0.119911	0.0721988	0.397961
gene:339479	BRINP3	1.51917	2.98356	2.05094	0.270206	0.573515	0.765796	0.455263	0.245641	0.256865	0.306706	0.585874	0.234407
gene:83990	BRIP1	0.133175	0.158091	0.219158	0.212655	0.208561	0.493892	0.59301	0.702592	0.321667	0.324862	0.335484	0.289869
gene:55299	BRIX1	5.05323	5.34698	4.7346	12.6204	12.5252	11.9976	9.3708	9.18334	10.2348	12.1916	12.4611	10.248
gene:55845	BRK1	79.9623	80.5825	77.4694	82.36	82.9744	81.4325	91.1985	79.3332	81.5536	85.9959	88.8758	93.2621
gene:79173	BRME1	1.82608	1.49987	1.0641	0.473245	0.455575	0.828277	0.52255	0.263364	0.132943	0.475719	0.407547	0.666238
gene:25855	BRMS1	22.5076	22.5612	20.948	38.9909	39.2599	35.937	35.5018	36.995	30.9435	36.6177	38.0666	38.0778
gene:84312	BRMS1L	0.994769	1.04053	1.08014	0.585057	0.701961	0.602906	0.660368	0.777705	0.772085	0.882954	0.838535	0.688588
gene:148362	BROX	11.4511	10.9812	10.5328	12.0056	10.9247	9.94329	9.97705	11.4096	10.8222	9.34683	10.7502	8.6046
gene:7862	BRPF1	4.08171	4.33168	4.05357	8.32249	8.38666	7.92837	8.12172	6.78189	6.32956	8.48574	8.67931	7.87907
gene:27154	BRPF3	22.4786	20.8687	21.7829	5.49946	5.78447	6.32848	5.10726	4.99281	5.21297	6.09999	5.87058	5.61682
gene:680	BRS3	0	0	0	0	0	0	0	0	0	0	0	0
gene:84446	BRSK1	0.097264	0.327509	0.367663	0.254592	0.104161	0.162249	0.056068	0.0749818	0.0573926	0.123388	0.066259	0.179175
gene:9024	BRSK2	0.374451	0.507972	0.605735	0.255368	0.218776	0.40971	0.293782	0.146073	0.221983	0.370029	0.243278	0.337921
gene:54014	BRWD1	5.63944	4.48584	4.53726	6.2962	5.90965	5.96169	7.11173	6.3269	6.17834	5.38926	5.9902	5.59806
gene:254065	BRWD3	4.70205	4.0464	4.24836	6.08534	6.29473	5.79535	5.64877	5.39463	5.48063	5.95376	6.13968	5.40375
gene:26580	BSCL2	5.61995	5.27253	14.4352	5.63221	4.41641	6.32907	11.1315	8.21107	7.82693	6.66517	5.39644	5.80292
gene:55108	BSDC1	24.8929	26.3784	25.8344	38.6978	40.9184	37.8551	40.2136	38.0387	37.4189	40.5104	38.8426	42.939
gene:682	BSG	550.645	588.643	588.614	614.033	600.116	586.783	628.238	599.484	578.369	589.004	582.389	612.133
gene:8927	BSN	0.124776	0.159857	0.139856	0.10227	0.114416	0.0650455	0.144827	0.141696	0.0941386	0.122664	0.111805	0.101816
gene:7809	BSND	0	0	0	0.01682	0	0.0106997	0.019075	0	0.011882	0.022976	0	0.0218972
gene:54836	BSPRY	4.91101	4.88501	4.08763	9.64334	8.93744	8.60553	10.3563	10.33	9.56015	10.237	8.59714	10.2619
gene:683	BST1	5.8789	4.15177	5.17388	3.6724	3.73567	3.54911	4.00845	2.717	3.32921	3.48089	4.06824	3.4773
gene:684	BST2	0.178746	0.20981	0.116016	0.226779	0.140966	0.607194	0.39738	0.297676	0.243293	0.537062	0	0.149987
gene:9044	BTAF1	6.36113	6.12308	5.55992	8.55185	8.64073	8.2498	8.66563	8.7615	8.88991	8.40865	8.09608	7.74612
gene:53339	BTBD1	28.4885	26.9767	26.4713	26.8885	28.8468	28.0978	27.894	28.1726	28.5965	25.7073	26.2823	25.1264
gene:84280	BTBD10	13.0391	12.4693	12.5258	9.32825	8.07006	8.97413	7.63401	7.36852	8.19939	7.42321	8.63559	8.37615
gene:118663	BTBD16	0.252021	0.349903	0.0844786	0.316541	0.0748087	0.299582	0.111228	0.354902	0.0449809	0.191092	0.064535	0.0737038
gene:388419	BTBD17	0.261065	0.34785	0.143624	0	0.129534	0.0303453	0.035938	0.0823066	0.122854	0.248723	0.051611	0.222022
gene:643376	BTBD18	0	0.0188154	0.0190641	0.053544	0.055971	0.0146676	0.08651	0.0341439	0.0404889	0.038753	0.0675141	0.118412
gene:149478	BTBD19	2.08258	1.83187	4.54835	6.57454	6.82316	5.53123	5.31597	5.89184	5.52367	5.19856	4.01676	5.73853
gene:55643	BTBD2	39.8888	40.2613	42.1076	31.9594	30.3586	31.8246	32.9989	28.6657	27.3379	32.6148	28.6376	32.915
gene:22903	BTBD3	18.198	17.5481	17.748	18.6754	17.0219	17.1157	17.1957	17.4149	19.5987	16.8975	16.7459	16.243
gene:90135	BTBD6	12.8771	13.7311	11.8117	5.86795	5.38853	5.45841	5.23672	5.19161	4.98698	6.12875	5.97155	6.11661
gene:55727	BTBD7	8.43276	6.52549	7.05919	5.9702	5.30236	5.16992	5.04797	5.34284	5.17876	5.57809	5.68684	4.9905
gene:284697	BTBD8	0.992126	0.923613	1.16367	0.232749	0.173166	0.168163	0.427282	0.54359	0.244481	0.263653	0.124708	0.192668
gene:114781	BTBD9	5.1452	5.22274	5.52567	2.44224	2.36531	2.32336	2.17806	2.12892	2.47042	2.01386	2.70318	2.13728
gene:685	BTC	1.34432	0.553044	1.17308	0.656589	0.719711	0.611638	0.572511	0.435966	0.579373	0.468756	0.493581	0.481222
gene:686	BTD	6.28243	5.75355	9.29837	5.52104	4.07925	3.88687	4.51832	3.97284	5.4676	4.65615	5.70383	5.58172
gene:689	BTF3	268.734	253.042	233.68	271.809	254.721	252.568	218.864	211.564	214.59	257.135	252.711	243.733
gene:91408	BTF3L4	5.11841	4.35221	4.53278	4.86006	3.72953	3.5822	3.36262	4.16071	4.34929	3.72153	3.97963	4.2255
gene:694	BTG1	40.2715	38.7514	39.4915	44.6113	44.7536	41.6613	37.1173	41.0511	40.5929	44.5738	46.8573	45.4686
gene:7832	BTG2	35.9358	39.5698	38.3239	64.9838	67.7244	63.1872	73.2024	74.1764	68.8113	65.8066	67.9968	73.1922
gene:10950	BTG3	10.0131	8.68393	9.50155	16.8086	19.8274	18.0239	19.9905	19.3994	18.9772	14.3104	17.4089	17.7021
gene:695	BTK	0.053028	0.0147886	0.0528029	0.034299	0	0.0485752	0	0.0479646	0.0122658	0	0	0.0329883
gene:151888	BTLA	0	0	0	0	0	0.0178351	0	0	0	0	0	0
gene:696	BTN1A1	0.175736	0.214728	0.127614	0.118429	0.0862517	0.0699815	0.144244	0.226463	0.194441	0.069083	0.141493	0.155944
gene:11120	BTN2A1	10.2618	12.3625	11.3538	8.90206	7.61603	8.38153	7.44533	8.12552	8.33328	7.73473	8.1041	8.00863
gene:10385	BTN2A2	1.38419	1.49408	1.23285	8.26102	7.68161	7.95268	11.9327	12.2984	10.676	9.93464	8.57799	11.076
gene:11119	BTN3A1	3.48968	4.52559	3.37415	3.49638	2.6594	2.60231	3.84543	4.85736	4.45781	3.06602	2.94955	3.6834
gene:11118	BTN3A2	3.72624	4.46368	4.52457	3.1998	2.96876	3.31648	2.9051	2.89601	3.60592	3.27345	3.37667	3.32154
gene:10384	BTN3A3	0.26812	0.5532	0.532419	0.279472	0.202852	0.257314	0.490614	0.581798	0.25336	0.119448	0.151532	0.214225
gene:56244	BTNL2	0	0.0356972	0	0	0	0	0	0	0	0.034798	0	0
gene:10917	BTNL3	96.5721	103.331	92.2095	33.8829	31.8409	34.1526	26.4759	28.9066	28.9546	31.9936	34.4278	31.3365
gene:79908	BTNL8	30.0693	34.4295	28.7186	12.9226	13.104	11.2743	9.08435	10.0362	11.4481	12.153	12.2144	11.1879
gene:153579	BTNL9	1.96643	1.47703	1.85489	2.45907	2.20986	2.35896	2.50566	2.12444	2.32742	1.12707	1.22016	2.88466
gene:8945	BTRC	3.68101	3.24499	2.68991	2.4316	2.26143	2.41049	2.48639	3.31785	2.88929	2.53127	2.24756	1.91309
gene:699	BUB1	0.946007	0.589012	1.13162	1.04803	1.09306	0.984562	0.824343	1.04594	1.12742	1.25261	1.44725	0.957213
gene:701	BUB1B	1.00623	0.899273	0.68664	0.853612	0.870723	0.939425	0.774343	0.866893	0.695818	1.02995	1.03244	1.12069
gene:106821730	BUB1B-PAK6	0	0	0	0	0	0	0	0	0	0	0	0
gene:9184	BUB3	16.9337	17.3529	18.6075	12.6551	11.3174	11.5714	13.5821	11.8001	12.8736	14.2751	13.4549	12.3675
gene:84811	BUD13	5.34481	6.42645	5.79939	5.42209	4.46002	5.01857	5.05365	5.43494	5.37406	5.42453	4.63912	5.58746
gene:114049	BUD23	22.8661	23.2423	23.7327	42.1422	38.8547	40.5333	40.2415	40.4291	37.5583	44.124	41.3307	45.4377
gene:8896	BUD31	34.4546	33.0163	31.2308	43.5046	43.7951	41.6749	40.1308	40.7694	40.2434	40.0519	40.5457	39.6819
gene:11149	BVES	0.389927	0.462773	0.457438	0.428322	0.396452	0.410212	0.588663	0.719107	0.529647	0.722227	0.394458	0.586016
gene:705	BYSL	2.93179	2.62592	2.68467	7.66699	7.85393	7.40715	6.08582	5.67215	6.02604	8.00036	8.01248	7.66313
gene:9689	BZW1	35.5317	34.8697	31.9378	48.3942	48.7359	45.3403	45.7645	46.3129	43.9645	43.2954	50.1878	40.614
gene:28969	BZW2	16.646	16.8919	16.3711	24.2884	23.952	22.6327	26.4828	27.0581	27.1259	24.1629	23.2214	23.8686
gene:387723	C10orf143	0.464937	0.416372	0.487162	0.19651	0.233746	0.0361772	0.64649	0.0928655	0.199849	0.208275	0.0191917	0.274052
gene:414157	C10orf62	0	0	0	0	0	0	0	0	0.0461534	0	0	0
gene:256815	C10orf67	0.012902	0	0	0	0.0741595	0	0.038654	0.01378	0	0	0	0
gene:80007	C10orf88	2.16646	2.15776	2.30182	1.1283	1.34237	1.20386	0.935807	1.58963	1.16293	1.19636	1.24906	1.16878
gene:118611	C10orf90	0	0	0	0	0	0	0	0	0	0	0	0
gene:79946	C10orf95	19.7023	18.4408	18.8096	13.2271	10.2764	11.2963	10.9571	8.67708	8.77479	11.9252	11.7272	13.5869
gene:56673	C11orf16	0	0	0	0.09685	0	0	0	0.13096	0	0.03883	0	0.196818
gene:29125	C11orf21	0	0	0	0	0	0	0	0	0	0	0	0.0121459
gene:53838	C11orf24	15.5934	18.061	18.3601	21.8765	20.9794	23.23	26.8102	25.6739	25.5818	24.0966	23.3923	24.164
gene:160298	C11orf42	0.239566	0.549435	0.62493	0.316259	0.163158	0.199046	0.215783	0.183948	0.0731537	0.11537	0.11108	0.0694162
gene:91894	C11orf52	8.13814	7.17679	6.7516	2.94525	4.85285	3.48394	3.62107	2.88846	2.91698	3.70047	2.98772	4.616
gene:28970	C11orf54	33.5134	30.6499	30.5399	22.3863	26.557	23.0557	22.0449	21.8182	20.518	24.3019	24.6489	20.2696
gene:10944	C11orf58	34.1021	27.8584	33.2114	26.2798	30.1347	28.8056	26.1356	25.7164	27.9792	24.7514	26.4924	23.8747
gene:160140	C11orf65	0.221651	0.143511	0.17785	0.293833	0.0355728	0.121539	0.095056	0.0908607	0.0886645	0.063993	0.0538979	0.160557
gene:83638	C11orf68	12.1703	12.8458	15.1267	8.14479	7.54245	8.40639	9.68431	9.39753	8.15131	7.75866	7.92115	9.38992
gene:54494	C11orf71	2.08039	1.77092	2.04401	0.524183	0.678167	0.743368	1.20273	0.937147	0.683864	0.690139	0.513973	0.677439
gene:254439	C11orf86	1.63446	2.9965	2.87988	1.84468	1.82813	1.35374	2.6359	1.80191	1.6805	1.63563	1.51312	1.60706
gene:399947	C11orf87	0	0	0	0	0.00690927	0.00684196	0	0	0	0	0	0
gene:100131378	C11orf91	0.093593	0.093106	0	0.310158	0.525161	0.573406	0.669993	0.231805	0.3198	0.730368	0.388211	0.344985
gene:387763	C11orf96	0	0	0	2.31241	1.42767	1.5361	1.73147	1.38797	1.55706	2.36008	2.6103	2.83057
gene:643037	C11orf97	0	0.0814199	0	0	0	0.0829644	0.202736	0.059817	0.140075	0	0	0.180329
gene:102288414	C11orf98	23.9719	29.4778	23.1784	37.1391	26.4798	34.4616	33.4002	39.2685	35.735	29.2912	33.9018	35.2234
gene:57102	C12orf4	1.50624	1.86821	2.07651	0.974432	0.571906	0.981634	1.26221	1.02166	0.963855	0.859041	0.910092	0.956174
gene:374470	C12orf42	0	0	0	0	0	0	0	0	0	0	0	0
gene:64897	C12orf43	3.55491	3.97177	5.06077	4.62892	5.35475	4.66642	3.84925	5.08565	4.68953	5.31636	4.75987	4.51227
gene:160419	C12orf50	0	0	0.0538899	0	0.0108612	0.0124721	0	0.0484767	0.0326929	0	0.0531451	0
gene:121273	C12orf54	0.010566	0	0	0	0	0	0	0	0	0	0	0
gene:115749	C12orf56	2.00877	3.95125	3.03186	1.86975	1.91227	0.876266	0.919031	1.17919	0.589051	1.29964	1.32461	1.35001
gene:113246	C12orf57	36.4226	39.3318	43.2108	38.2788	36.4866	33.7022	35.1631	31.8944	30.5878	37.7311	37.7414	39.4289
gene:144608	C12orf60	0.072045	0.201387	0.154558	0.33393	0.297627	0.68325	0.375061	0.631857	0.479897	0.160539	0.191051	0.435764
gene:728858	C12orf71	0	0	0	0	0	0.0414593	0.103868	0.0597507	0	0	0.0416866	0.217323
gene:387882	C12orf75	58.8703	60.0942	58.1071	66.3307	66.7123	62.4483	71.235	68.8101	72.0694	64.7091	66.5623	62.9765
gene:400073	C12orf76	4.13384	4.48865	4.21685	6.46812	7.01945	7.88578	7.5625	5.83881	6.97656	7.18782	7.40296	6.75007
gene:647166	C13orf42	0	0	0	0	0	0	0	0	0	0	0	0
gene:100507747	C13orf46	0	0	0	0	0	0	0.013195	0.0112047	0	0	0.0116474	0
gene:55017	C14orf119	11.5314	12.6279	13.9427	8.39404	9.30367	7.84649	10.193	9.96176	10.5757	8.8671	7.88852	9.77433
gene:56967	C14orf132	0.974297	0.911603	1.17871	0.376882	0.439985	0.529954	0.751808	0.500992	0.537015	0.517527	0.370607	0.494908
gene:122525	C14orf28	1.20998	1.63729	1.86338	0.90916	0.841348	0.656962	0.880127	0.931959	1.15247	0.795689	0.980609	1.12644
gene:317761	C14orf39	0	0	0	0	0	0	0	0	0	0	0	0
gene:60686	C14orf93	3.40899	3.9117	3.46802	2.18299	2.2128	2.23268	3.05202	3.29986	3.00698	3.54067	2.6925	3.80006
gene:56905	C15orf39	11.8649	13.407	11.9911	22.5828	23.2556	23.0314	21.9623	21.1438	19.059	25.0071	23.6683	24.1993
gene:123207	C15orf40	2.78947	2.63779	3.4476	2.06435	2.41699	2.57324	3.09021	1.97631	2.36401	2.29564	2.35537	1.89059
gene:84419	C15orf48	159.741	169.783	167.016	130.122	127.72	120.55	124.552	129.949	125.053	126.15	127.957	125.404
gene:145853	C15orf61	0.988751	0.876699	0.967625	0.957567	0.890274	1.54733	0.654041	0.886876	0.591777	0.864332	0.604079	0.864984
gene:643338	C15orf62	1.70288	1.40236	1.3088	2.96874	2.62963	2.77792	1.95579	2.14971	2.34796	4.04117	2.85454	2.09178
gene:123775	C16orf46	0.072822	0	0	0.417177	0.612483	0.629831	0.888976	0.308059	0.587425	0.238914	0.0398569	1.06596
gene:283897	C16orf54	0	0	0	0	0.0166636	0.0217016	0	0	0	0.017275	0	0
gene:404550	C16orf74	0	0	0	0.042677	0	0.225538	0	0.120284	0.0933991	0.076072	0.124791	0
gene:388284	C16orf86	0.182036	0.255482	0.121606	0.477804	0.170507	0.112956	0.343271	0.194072	0.252772	0.102175	0.0568252	0.333232
gene:388272	C16orf87	0.913691	0.834909	0.734282	2.03156	2.41857	2.31825	1.98777	2.20494	2.21874	2.16068	2.53223	2.12169
gene:146556	C16orf89	0	0.0327254	0	0	0.0783298	0	0	0	0	0	0	0
gene:646174	C16orf90	0	0	0.0385331	0	0	0	0	0.00281603	0	0	0	0
gene:146378	C16orf92	0	0	0	0	0	0.0108606	0	0	0	0	0	0
gene:100506581	C16orf95	1.42414	0.847283	0.133462	0.815939	1.09267	1.05384	0.881852	1.01248	0.460719	0.553907	0.587129	0.730867
gene:342346	C16orf96	0	0.0336341	0.0137117	0.01082	0.0540859	0	0	0	0	0.020368	0	0
gene:388327	C17orf100	1.16192	1.10109	0.660521	2.09707	1.65508	1.8934	1.90549	2.21867	2.06214	1.76145	2.48491	2.44099
gene:100130311	C17orf107	0.622797	0.634876	0.585174	1.05403	0.940716	0.778647	1.23003	1.13715	0.745872	1.37532	1.02536	1.3819
gene:110806298	C17orf113	1.27339	1.54066	1.37932	0.256296	0.181303	0.167222	0.431259	0.328176	0.297787	0.302496	0.150218	0.254968
gene:119139905	C17orf114	0.52119	0.189413	0.274089	0	0.41659	0.1369	0.289891	0.07183	0.066798	0.34851	0.181207	0.3241
gene:124944	C17orf49	1.58778	3.21461	1.12548	4.20752	2.6554	2.23019	2.01222	2.26265	2.04685	2.19725	3.22937	2.09677
gene:146853	C17orf50	0.073741	0	0.253823	0.199636	0	0.0580192	0	0	0.131509	0.08035	0.198886	0.391205
gene:284018	C17orf58	0.804251	1.44095	1.71904	0.838411	0.72064	0.781513	1.21099	2.12631	1.8131	0.622036	0.63541	1.01535
gene:339210	C17orf67	0.973887	0.830569	0.576569	2.42135	2.65731	1.8543	2.37342	2.31011	1.66884	2.49772	2.39227	2.72662
gene:64149	C17orf75	2.11222	2.00459	2.00288	0.985983	0.752635	0.864067	1.33728	1.30029	1.30318	0.917184	1.39988	0.861763
gene:284099	C17orf78	0.089636	0.111951	0.0856785	0	0.0792213	0	0.11304	0.126329	0	0.05536	0.0437954	0.145471
gene:55028	C17orf80	3.5111	4.09274	4.6477	4.74763	4.51572	4.28076	5.10278	5.41287	5.55499	4.4883	5.14609	5.14764
gene:100141515	C17orf99	0	0	0.316774	0	0.0434877	0	0.039592	0.256706	0.192773	0.30826	0.141148	0.257294
gene:83608	C18orf21	9.29213	9.01715	9.96499	10.1817	10.2958	9.94135	8.31669	8.10678	10.8984	10.308	10.1391	9.37716
gene:497661	C18orf32	5.50236	3.72597	4.85034	4.07647	3.49405	3.46014	3.66708	3.90367	3.89914	4.16644	3.88624	3.46741
gene:162681	C18orf54	0.109968	0.0998919	0.0766844	0.293401	0.45567	0.37534	0.499571	0.444012	0.41587	0.238126	0.192626	0.228563
gene:83636	C19orf12	4.63345	3.96236	4.10656	4.0174	3.74791	3.99457	4.53675	3.76721	3.56443	4.22919	4.78464	3.63976
gene:147685	C19orf18	0.537977	0.271323	0.204265	0.273668	0.455643	0	0.431588	0.516521	0.684611	0.199595	0.347374	0.306519
gene:148223	C19orf25	15.2773	16.5328	16.2385	17.4041	17.6163	19.8538	21.5657	16.5331	17.4077	19.4062	16.7799	19.9302
gene:64073	C19orf33	110.487	111.38	114.009	90.0322	90.1004	91.5928	81.8466	74.3234	75.4397	86.0614	84.5915	92.2032
gene:255809	C19orf38	0	0.071519	0.112737	0.055845	0.187385	0.0726469	0	0.0286971	0.0463061	0.427595	0.304093	0.151807
gene:84167	C19orf44	0.75908	0.677398	0.653978	1.47648	1.40372	1.31374	1.21758	1.08084	1.12956	1.11687	1.24574	1.26519
gene:126526	C19orf47	2.04078	2.6928	2.74873	7.56259	7.49342	8.74254	7.91275	8.16983	7.69519	7.77299	7.4234	8.31241
gene:28974	C19orf53	38.9079	39.2073	43.637	47.2647	47.1367	45.8111	46.041	42.2575	43.7959	46.4605	41.3513	52.0833
gene:646457	C19orf67	0	0	0	0.056949	0.0699663	0.173734	0.113034	0.130867	0	0.023541	0.0240858	0.118369
gene:55150	C19orf73	0.545702	1.3096	1.49267	0.818682	0.48546	0.665235	0.743876	0.56997	0.183464	0.672762	0.631886	0.802224
gene:147646	C19orf84	0	0	0	0	0	0	0	0	0	0	0	0
gene:111064650	C19orf85	0	0	0	0.010266	0	0	0	0	0	0	0	0
gene:10438	C1D	9.08357	8.16369	7.02193	5.26642	6.4591	5.48623	6.25416	7.0841	6.71472	5.70723	6.95283	6.8448
gene:56913	C1GALT1	5.9501	5.07839	5.47601	7.08836	7.55405	7.25593	6.66392	7.65314	7.55433	6.14807	6.44918	6.20691
gene:29071	C1GALT1C1	19.7818	20.7865	21.6381	14.8501	15.4202	16.189	15.5723	12.999	14.1863	15.0057	16.0947	13.0189
gene:728819	C1GALT1C1L	0	0	0	0	0	0	0	0	0	0.085389	0.0438297	0
gene:92346	C1orf105	0	0.0595227	0	0	0	0	0	0	0	0	0	0
gene:79762	C1orf115	65.5538	70.2341	66.1962	27.5428	28.0364	26.916	30.4997	26.6901	29.7346	29.9202	27.4172	29.802
gene:79098	C1orf116	43.6386	56.4282	49.3209	31.3415	30.4921	32.3782	37.9552	41.1076	39.6413	27.5993	28.4967	33.7946
gene:127687	C1orf122	13.6479	21.5097	16.8868	10.8365	9.08447	9.88653	10.4805	12.7056	12.761	15.3596	13.9237	10.9265
gene:148345	C1orf127	0	0	0.0231722	0	0	0	0.019274	0	0	0.01919	0	0
gene:128061	C1orf131	10.2772	10.327	10.0847	6.44865	6.12445	5.92405	6.86803	7.14471	6.17958	5.68002	5.68478	7.01249
gene:400757	C1orf141	0.012206	0.00860431	0	0	0.0360443	0.0795239	0	0.031635	0.0117602	0	0	0
gene:388649	C1orf146	0	0	0	0	0	0	0	0	0	0.070662	0	0
gene:54991	C1orf159	6.57364	7.04014	7.08756	8.94083	7.82265	8.37285	8.44438	7.28299	8.09088	10.1112	9.22857	10.8387
gene:128346	C1orf162	0.214345	0.108267	0.331648	0.165386	0.186141	0.286141	0.284655	0.290899	0.0992048	0.630217	0.308163	0.208925
gene:284498	C1orf167	0.001183	0.0183756	0	0.012566	0.00228621	0.00804794	0.001709	0.0165891	0	0.018793	0.000653006	0.0170315
gene:339448	C1orf174	4.44606	4.55386	4.6949	7.11467	5.65512	6.47686	7.09825	6.05082	5.27521	5.5401	6.57364	7.08033
gene:84886	C1orf198	8.00253	8.27766	7.84738	10.8962	9.45876	11.008	11.6348	11.2785	11.2708	10.9324	10.7183	10.0626
gene:81563	C1orf21	5.10755	4.86073	5.71003	2.99843	2.80335	2.75778	3.11742	3.15302	2.98183	3.05067	2.71913	2.69995
gene:149466	C1orf210	41.565	45.9333	46.5061	30.8975	33.2942	32.749	35.9532	37.7519	37.7829	33.788	31.1422	35.926
gene:127703	C1orf216	0.322875	0.322208	0.199386	0.588577	0.913312	0.516718	0.751493	0.6962	0.839247	0.780416	0.596265	0.584629
gene:400793	C1orf226	7.42078	9.12322	7.6161	9.83986	10.5151	9.86768	10.2644	10.3676	8.51117	10.5115	9.92307	9.75055
gene:110806296	C1orf232	0	0	0.0453492	0	0	0	0	0	0	0	0	0
gene:79169	C1orf35	7.79352	8.73532	10.7677	15.1946	15.8677	14.8324	14.6472	13.3293	12.9331	15.7293	15.1249	15.9648
gene:25912	C1orf43	105.375	99.1642	108.518	69.6754	73.1223	66.9044	72.3356	62.3904	62.8545	71.6085	75.7336	68.7912
gene:79078	C1orf50	3.50265	2.56707	2.07935	2.78934	1.65198	2.2304	3.1583	2.80878	2.78158	2.68578	3.14337	2.78268
gene:148423	C1orf52	2.8391	3.48645	3.6946	11.8944	12.4983	12.8907	10.5719	10.7187	11.4461	12.9293	13.075	10.8727
gene:388722	C1orf53	0.478748	0.705015	0.826493	0.978982	0.343798	1.26935	1.22173	0.230065	0.82209	0.834225	0.672069	0.402687
gene:79630	C1orf54	1.98785	2.54072	1.40126	0.307149	0.599374	0.425459	0.202863	0.239981	0.536354	0.424021	0.503372	0.437322
gene:54964	C1orf56	3.28823	3.1569	3.83704	2.03635	2.56881	2.25574	2.51093	3.24849	1.60849	2.11349	2.59001	3.00989
gene:148304	C1orf74	0.293332	0.201875	0.69425	0.693338	1.18996	1.34043	1.69592	0.698486	0.946065	0.589775	0.431081	1.6145
gene:708	C1QBP	27.4672	29.6992	30.5586	35.4738	36.3349	34.998	32.1625	33.6327	34.0574	35.5936	35.7721	34.2445
gene:10882	C1QL1	0.715038	0.903696	0.964395	0.674265	0.291387	0.664862	0.729496	0.691266	0.319108	0.819143	1.21721	0.568173
gene:165257	C1QL2	28.8837	43.1557	34.9909	9.70544	10.3635	8.73205	9.88088	11.2404	9.26074	8.15315	8.52195	9.49776
gene:389941	C1QL3	0.165384	0.384163	0.354754	0.132333	0.135196	0.241913	0.377481	0.377088	0.416036	0.257285	0.204524	0.275976
gene:338761	C1QL4	0.085495	0.0538643	0	0.095413	0.0274127	0.0528025	0.107161	0	0.0799144	0	0.0956384	0.0673334
gene:114897	C1QTNF1	6.32231	7.3592	7.03039	3.2291	3.03796	2.67607	3.8788	4.33479	3.73874	3.12796	3.32404	2.61211
gene:388581	C1QTNF12	4.02441	6.65243	4.3048	3.79034	4.95626	4.03066	4.96336	3.2171	3.31143	4.54877	3.30895	4.88118
gene:114898	C1QTNF2	0.249613	0.161324	0.302544	0.190189	0.217297	0.411957	0.364146	0.266225	0.163512	0.287005	0.213498	0.262386
gene:114899	C1QTNF3	1.02879	1.23093	0.598865	0.184965	0.515429	0.4673	0.855478	0.693672	0.65131	0.749918	0.713712	0.494292
gene:114900	C1QTNF4	0	0.0267361	0.0615885	0	0	0	0.079947	0.0929714	0	0.084788	0.0513574	0.106019
gene:114902	C1QTNF5	0.245333	0.13527	0.132169	0	0.0271635	0	0.114682	0	0	0	0.264258	0
gene:114904	C1QTNF6	0.644945	0.774915	0.972998	0.528914	0.281827	0.337987	0.601018	0.387009	0.495558	0.382553	0.579942	0.364666
gene:114905	C1QTNF7	0	0	0	0.011066	0	0.017531	0	0	0	0.011647	0	0
gene:390664	C1QTNF8	0	0.0456241	0.0175731	0	0.015794	0	0	0.0183809	0	0	0	0.016371
gene:338872	C1QTNF9	0	0	0	0.080488	0.0064417	0	0	0.0543643	0.055061	0.082252	0.0625701	0.0327937
gene:387911	C1QTNF9B	0	0	0	0	0	0	0	0.0423394	0	0	0	0
gene:715	C1R	0.237041	0.333863	0.22974	0.395523	0.251088	0.320284	0.296124	0.217754	0.178415	0.280074	0.325622	0.31201
gene:51279	C1RL	18.227	21.1396	18.7788	6.37579	6.13396	6.83059	6.0357	7.21785	6.4244	6.48175	5.4678	5.70205
gene:716	C1S	0.126517	0.107773	0.0909169	0.329942	0.203461	0.148174	0.088274	0.0879595	0.360049	0.253872	0.226541	0.187247
gene:717	C2	0.066622	0.104546	0.0620962	1.32739	1.89005	1.67266	0.612045	0.650605	0.701574	1.83058	1.66504	1.32673
gene:128864	C20orf144	0	0.0409521	0.0659777	0.222656	0.026556	0.165805	0.084033	0.070576	0.225298	0.285562	0.0654915	0.0651424
gene:140873	C20orf173	0	0	0	0	0	0	0	0	0	0	0	0.0966102
gene:400831	C20orf202	0.170725	0.123991	0.164978	0.043883	0	0.110172	0.13165	0.0528943	0.0232932	0.227187	0.0941317	0.112166
gene:284805	C20orf203	0	0	0	0	0	0.0264758	0	0	0	0.00097	0	0
gene:284739	C20orf204	0.067413	0.0712441	0.107008	0.24525	0.246672	0.525893	0.389708	0.262135	0.201593	0.243868	0.115114	0.314492
gene:140680	C20orf96	1.78164	1.82417	1.72666	4.31797	4.18062	3.55329	3.69638	3.99543	3.91139	3.72236	3.79899	3.77068
gene:101928147	C21orf140	0.115323	0.0718758	0.0218747	0.094775	0.257638	0.0172755	0.121495	0.0266993	0.0883426	0.085238	0	0.0578274
gene:54058	C21orf58	0.804257	0.956057	0.7339	2.00206	1.66313	2.00786	1.9136	2.67641	1.42228	1.80539	1.42389	1.61634
gene:56245	C21orf62	0.020544	0.0344307	0.0114481	0.024147	0.0214435	0.0216305	0.03812	0.00796372	0.0148032	0.019096	0.0412089	0.00368877
gene:54149	C21orf91	1.23657	1.10474	1.18841	2.38943	2.23543	2.15446	2.3281	2.42378	1.81025	1.99442	2.47481	1.80282
gene:150248	C22orf15	0	0.0456179	0.0858114	0.103248	0.024108	0	0.041987	0.0574012	0.0166031	0.020471	0.0381602	0
gene:84645	C22orf23	0.630355	0.586374	0.414669	0.238112	0.155001	0.242457	0.468225	0.535992	0.253329	0.489189	0.218696	0.234143
gene:25770	C22orf31	0.490105	0.0968413	0	0.102321	0	0	0	0	0	0	0	0.0908486
gene:128977	C22orf39	6.02386	3.29885	3.96381	2.0586	2.79597	2.11273	2.65027	2.62716	2.56932	3.47946	3.24969	2.45903
gene:150297	C22orf42	0.571516	0.333578	0.292033	0.751821	0.0911874	0.302381	0.542772	0.920284	0.59963	0.723357	0.454101	0.551681
gene:25966	C2CD2	3.52815	3.06808	3.83526	2.18031	2.2008	2.44664	2.45141	2.24961	2.27755	2.38877	2.47668	2.06256
gene:9854	C2CD2L	6.97488	7.34814	8.03189	10.8992	10.7372	11.3097	9.03036	8.66948	8.74742	11.0121	10.2539	9.21761
gene:26005	C2CD3	2.49549	2.7869	2.66669	2.3907	2.5891	2.2657	3.16695	3.04199	3.31855	2.5762	2.03609	2.75103
gene:145741	C2CD4A	0.21025	0.0957251	0.155458	0.233078	0.133446	0.185409	0.329062	0.267279	0.217941	0.212953	0.238658	0.211435
gene:388125	C2CD4B	0.839747	1.20784	0.906489	0.709224	0.468938	0.553054	0.885064	0.653482	0.777904	0.378544	0.611044	0.845252
gene:126567	C2CD4C	0.213406	0.317135	0.308661	0.050934	0.138811	0.218882	0.111554	0.163711	0.190625	0.182276	0.259516	0.386597
gene:100191040	C2CD4D	0.296876	0.51689	0.186732	0.382612	0.306958	0.210158	0.333076	0.491724	0.651481	0.12163	0.267899	0.40331
gene:9847	C2CD5	12.9932	10.3393	12.0757	6.16796	6.24421	6.28791	5.89833	7.05528	6.48718	5.516	6.285	5.45414
gene:151254	C2CD6	0	0.0110979	0	0.01327	0.0174737	0	0	0.0260089	0.0199477	0	0	0
gene:150590	C2orf15	2.65806	1.83237	2.01135	2.38674	2.63691	2.26227	2.04685	1.8888	1.36153	2.58028	1.79951	1.62793
gene:54980	C2orf42	2.37184	1.85009	2.80728	1.90425	2.0132	1.67857	2.72923	2.42643	2.65489	2.23963	2.14815	2.29302
gene:79074	C2orf49	5.50535	5.08235	4.85438	10.2642	10.2291	9.87198	8.14745	8.1958	6.95552	8.98959	9.19418	8.60217
gene:130813	C2orf50	0	0	0	0.006347	0	0.00529185	0.014368	0.00642941	0.0193107	0.01077	0.0206201	0.0147948
gene:401027	C2orf66	0.041532	0.135841	0.126576	2.33131	2.66595	3.22913	1.67417	2.25768	2.16191	3.20856	3.00404	1.74554
gene:388969	C2orf68	9.12925	9.73556	8.87629	8.97562	9.18977	8.83741	9.59793	11.1022	9.99104	10.3451	9.47913	10.0871
gene:205327	C2orf69	1.90424	1.82048	1.61259	3.97941	5.23043	4.31917	4.18958	5.03888	4.92979	4.54901	4.57499	3.75723
gene:257407	C2orf72	51.3106	48.4096	47.1667	12.5658	12.362	12.3229	10.2765	9.54608	9.71297	11.8063	11.3622	12.1549
gene:129852	C2orf73	0	0	0	0	0	0	0	0	0	0	0	0
gene:339804	C2orf74	3.65479	4.52185	3.55698	1.90969	1.28774	2.05449	1.58115	2.43945	1.9805	0.73994	1.15929	1.12842
gene:130355	C2orf76	2.7805	2.26339	3.99313	1.63207	2.4282	1.30805	1.50522	2.72797	1.73681	1.51056	2.18299	1.9668
gene:388960	C2orf78	0	0	0	0	0	0	0	0	0	0	0	0
gene:389073	C2orf80	0	0	0	0	0	0	0	0	0	0	0	0
gene:388963	C2orf81	0.126303	0.0954866	0.130405	0.864403	0.786702	0.824943	1.20185	1.48589	0.923508	0.757076	0.389584	0.914388
gene:84281	C2orf88	7.65195	7.33647	7.08991	2.03811	2.38993	1.99974	1.56248	2.82264	2.18359	2.51003	2.4125	1.59558
gene:728537	C2orf92	1.44893	2.47474	1.26206	1.23238	2.37384	2.89776	3.29264	2.72672	3.5995	1.97426	1.51695	2.12161
gene:718	C3	10.2102	13.1728	10.0226	17.6954	17.4039	17.446	18.1472	25.0688	26.2903	18.9598	17.4986	17.0445
gene:719	C3AR1	0	0	0.0226685	0.008301	0	0	0	0	0	0.02941	0	0
gene:51161	C3orf18	0.181481	0.44787	0	0	0.103864	0.19487	0.076725	0.11797	0.123213	0.108533	0.0285531	0.0328076
gene:84077	C3orf20	0.064593	0.0338675	0.0193874	0.01221	0.0828358	0.0149308	0.03432	0.0222271	0	0.046741	0.0183674	0.030996
gene:152065	C3orf22	0.02314	0	0	0	0	0	0	0	0	0	0	0
gene:285315	C3orf33	1.00172	0.827737	0.738166	0.397441	0.310292	0.324706	0.574769	0.789132	0.60423	0.449364	0.510709	0.335438
gene:285237	C3orf38	7.205	5.89016	6.3068	7.31208	7.04577	6.93524	6.36221	6.41438	6.83464	6.71544	7.03616	6.5775
gene:132200	C3orf49	0	0	0.0326549	0.019222	0.0178936	0	0.030443	0.048752	0	0.081813	0	0
gene:79669	C3orf52	22.7485	26.398	22.6063	22.841	25.1418	21.924	18.9786	19.4785	21.4792	25.2079	25.2319	22.0603
gene:375341	C3orf62	2.50987	2.46537	2.5774	1.61089	1.59521	1.5405	1.75707	1.56211	1.54832	1.65969	1.32631	1.77147
gene:285382	C3orf70	1.24029	1.34631	1.31388	0.381044	0.231066	0.336792	0.461488	0.53404	0.4973	0.265029	0.240445	0.447662
gene:401097	C3orf80	0.074881	0	0.110671	0	0	0	0	0.0178332	0	0	0	0
gene:646498	C3orf84	0	0	0	0	0	0	0	0	0.0323662	0	0	0
gene:401081	C3orf85	3.73098	2.39276	4.19978	0.585945	1.8875	1.06382	1.13435	1.07306	1.28368	1.34032	1.49252	0.967889
gene:720	C4A	0.170216	0.303473	0.097595	0.243863	0.079127	0.143306	0.188654	0.389061	0.179169	0.217342	0.146085	0.0920434
gene:721	C4B	0.147784	0.342052	0.114634	0.238109	0.150207	0.133959	0.269046	0.489908	0.155191	0.154214	0.0994458	0.109165
gene:722	C4BPA	0.48976	0.308395	0.436029	0.257062	0.326733	0.441616	0.336966	0.183173	0.479045	0.230136	0.500209	0.503265
gene:725	C4BPB	1.64407	2.26332	1.92465	1.75553	2.24191	1.46617	1.65114	1.16401	1.7131	2.2609	1.358	1.87005
gene:55286	C4orf19	8.42043	9.60636	8.59129	7.55891	7.33463	7.74159	7.41758	7.17843	7.8901	7.68213	7.18918	5.98963
gene:401152	C4orf3	20.5024	18.9893	21.0802	14.7398	14.9901	16.1534	16.1254	14.4208	15.2675	14.2612	16.2866	15.1233
gene:132321	C4orf33	2.62004	3.48489	2.44791	3.66536	4.14397	3.72895	2.81375	3.43882	3.41727	2.94954	3.97524	3.02414
gene:132989	C4orf36	0.268002	0.183276	0.0539594	0.089601	0.154839	0.0601387	0.184863	0.00696528	0	0	0.0225644	0
gene:201725	C4orf46	0.977195	0.71396	0.817902	6.36205	7.08446	6.39768	5.45329	6.02044	5.02686	6.97419	7.34002	5.7091
gene:389197	C4orf50	0	0	0	0	0	0	0.009228	0	0.00349635	0	0.00622852	0
gene:646603	C4orf51	0	0	0	0	0	0	0	0	0.0551625	0	0	0
gene:285556	C4orf54	0	0	0.0094333	0.023909	0.00543708	0.0245211	0.013996	0.0227828	0.0171918	0.015413	0.0176468	0
gene:727	C5	3.37596	2.5516	3.15546	2.41673	2.48253	2.13765	2.18959	1.96415	1.13903	2.31885	2.75602	2.11379
gene:728	C5AR1	0.52264	1.13386	1.29106	0.977012	1.07695	1.15997	1.3619	1.0308	1.04011	1.01796	0.804421	1.24458
gene:56951	C5orf15	16.5261	14.0363	15.8045	15.6906	15.0552	15.4943	12.682	14.0981	13.8239	13.2744	14.1807	13.0017
gene:55322	C5orf22	3.84464	3.80176	3.38312	4.97547	4.90021	4.88002	5.19943	5.94242	6.2847	4.68126	5.54394	4.89558
gene:134553	C5orf24	7.61324	6.38296	7.05777	3.412	3.96247	4.06361	4.31443	4.59335	4.82235	3.3271	3.14964	3.15968
gene:375444	C5orf34	0.066453	0.148242	0.193563	0.773515	0.521537	0.677381	0.441837	0.485029	0.357448	0.272412	0.381904	0.215649
gene:389336	C5orf46	0	0	0	0	0	0	0	0	0	0	0	0
gene:133491	C5orf47	0	0	0	0	0	0	0	0	0	0	0	0
gene:100190949	C5orf52	0.406008	0.216302	0.380945	0	0	0	0	0	0.0906645	0	0	0
gene:401207	C5orf63	0.058158	0.068459	0	0	0.157204	0.0142952	0	0	0.0322966	0.030146	0	0
gene:729	C6	0.442548	0.378985	0.238059	0.186896	0.20606	0.208447	0.277176	0.191675	0.12923	0.336264	0.180429	0.36679
gene:168090	C6orf118	0.05019	0	0	0.04095	0.0450016	0.0493864	0	0	0	0	0.0298444	0
gene:387263	C6orf120	10.1219	8.85844	10.355	7.30782	7.27963	7.7771	9.64493	8.84903	9.19621	7.07524	7.27873	7.87833
gene:647024	C6orf132	12.5316	12.2014	13.5854	9.07007	8.17121	8.37819	8.11396	8.47354	7.57562	9.5058	10.2388	9.4181
gene:221545	C6orf136	15.1445	17.6501	17.0487	6.89191	7.30308	7.34202	7.44571	6.23756	7.54447	7.17021	8.22458	9.38156
gene:135398	C6orf141	7.29692	7.536	7.6158	20.3173	17.2425	18.1802	16.1959	13.3793	11.7098	21	17.4941	16.8145
gene:29113	C6orf15	0.318104	0.506306	0.589702	0.206567	0.620532	0.885795	0.172034	0.797257	0.606026	0.3166	0.629922	0.416902
gene:206412	C6orf163	0.374864	0.296706	0.209772	0.289166	0.318379	0.42319	0.264382	0.269294	0.427626	0.404376	0.0481785	0.346016
gene:441150	C6orf226	4.83888	3.40964	5.23927	2.71727	3.30652	2.3265	3.09445	2.61308	4.63265	2.38665	2.07222	3.58142
gene:57827	C6orf47	12.3354	16.2375	14.9131	22.5354	23.0103	22.5649	21.8776	21.1858	21.9504	25.1251	23.6451	22.5531
gene:347744	C6orf52	0.647862	0.22821	0.58235	0.838885	0.533728	0.258771	1.26113	0.864179	0.420498	0.542147	0.758663	0.688047
gene:352999	C6orf58	0	0	0	0	0	0.0438206	0	0	0	0	0	0
gene:81688	C6orf62	21.4306	23.5201	22.3435	15.0925	14.3153	15.2535	16.3233	20.9457	18.5068	15.8931	15.2862	14.594
gene:221477	C6orf89	15.1956	15.6291	15.0256	11.6013	10.4657	12.7235	14.4964	15.795	14.99	11.3275	11.5426	12.6413
gene:730	C7	2.26783	2.10608	2.09995	1.73379	1.88939	1.73836	2.64694	1.74104	1.92901	1.45158	1.94193	1.98126
gene:79020	C7orf25	2.74311	3.78948	2.9762	1.44118	2.71218	2.23284	1.16161	1.97437	4.20298	3.36285	3.49332	2.82865
gene:84310	C7orf50	6.36168	7.84958	9.32876	19.594	18.2943	18.9834	22.3512	22.3231	22.7929	17.405	19.2261	21.4324
gene:136288	C7orf57	0	0.0255868	0.0555511	0.037923	0.176318	0.270749	0.29276	0.352515	0.443361	0.121478	0.222472	0.270744
gene:731	C8A	0	0	0	0	0	0	0	0	0	0	0	0
gene:732	C8B	0	0	0	0	0	0	0	0	0	0	0	0
gene:733	C8G	0.394544	1.06637	1.31993	0.517372	0.334751	0.739018	0.223732	0.391013	0.499272	0.943482	0.524442	1.52263
gene:65265	C8orf33	4.26675	4.96159	4.5166	5.83486	4.89585	4.86814	4.58516	4.13748	4.26676	5.21513	6.02182	4.8458
gene:116328	C8orf34	0	0	0	0	0	0	0.020296	0	0	0	0	0
gene:100533105	C8orf44-SGK3	0.308623	0.281918	0	0.199034	0.213149	0.519488	0.163495	0	0.304307	0.557709	0.137072	0.0936583
gene:157773	C8orf48	0	0	0	0	0	0	0	0	0	0	0.0707958	0.0785328
gene:541565	C8orf58	2.42643	3.0365	3.037	2.68038	2.14904	2.00369	2.45503	2.55441	2.7611	2.84913	2.68925	2.53167
gene:84933	C8orf76	11.0736	11.071	9.93978	15.6679	15.4462	15.3745	15.5882	13.6851	14.9538	16.4317	14.725	15.3613
gene:414919	C8orf82	23.404	23.5187	28.0256	17.9913	16.5283	15.3493	15.2305	15.4978	13.1914	18.3859	20.181	17.7077
gene:100127983	C8orf88	0	0	0	0	0	0.0789059	0	0	0	0	0	0.0535626
gene:100130301	C8orf89	0	0	0	0	0	0	0	0	0	0	0	0
gene:735	C9	0	0	0	0	0	0.0431391	0	0	0	0	0	0
gene:401546	C9orf152	2.26688	2.46347	2.4708	0.468068	0.43714	0.53324	0.346963	0.344723	0.444434	0.410322	0.535542	0.390952
gene:389766	C9orf153	0.019941	0.0296737	0	0.142588	0	0	0	0.0834397	0	0	0.0642951	0.00221584
gene:55071	C9orf40	18.7509	17.8206	15.403	5.35404	4.9835	5.29656	6.36492	6.89098	6.03941	4.61096	5.13429	5.35812
gene:257169	C9orf43	0.083434	0	0.181812	0.049569	0.176843	0.141205	0	0	0	0	0.100009	0.189283
gene:375759	C9orf50	0	0	0	0	0	0	0	0.0258296	0	0	0	0.0177099
gene:138240	C9orf57	0	0	0	0	0	0.0989687	0.196835	0	0	0	0.00878866	0.137356
gene:203228	C9orf72	2.7571	2.00598	2.03991	4.04147	5.51154	4.97703	4.72874	5.16788	5.77803	3.53658	4.80728	3.95606
gene:51759	C9orf78	15.8731	16.3691	15.2805	24.5931	23.2482	23.2947	23.8714	21.9019	24.6348	22.0377	23.9414	24.2945
gene:138241	C9orf85	6.91608	6.1018	6.94754	14.2809	16.4989	13.9152	16.158	16.5188	19.3657	13.8226	14.8964	14.2387
gene:759	CA1	1.67581	1.86423	1.71628	1.12262	1.86417	1.13965	0.905924	0.507827	0.315242	0.780784	1.38589	1.54872
gene:56934	CA10	0	0	0	0	0	0	0	0	0	0	0	0
gene:770	CA11	0.125047	0.293027	0.127151	0.158733	0.47556	0.422877	0.455148	0.252811	0.282512	0.324183	0.235032	0.305648
gene:771	CA12	118.763	126.625	120.576	128.876	127.437	123.073	116.583	119.175	114.167	122.073	120.547	118.475
gene:377677	CA13	8.51768	7.98529	6.96217	4.79522	4.91063	4.54518	4.75052	5.40207	5.11138	4.50682	4.06876	4.38709
gene:23632	CA14	0.276903	0.269657	0.206858	0.129616	0.110956	0.0872745	0.056866	0.0340578	0.139771	0.132265	0	0.157708
gene:760	CA2	13.6939	10.8563	12.7712	13.7827	12.429	12.0382	14.8709	14.8723	15.2296	13.429	12.8777	11.6071
gene:761	CA3	1.31993	1.21617	1.01767	0.804021	0.400843	0.707416	0.978359	1.22239	0.771632	0.614453	0.803533	0.651145
gene:762	CA4	48.9341	57.505	57.9748	60.6756	61.951	56.5163	59.8904	52.6114	47.1008	64.251	59.157	59.6691
gene:763	CA5A	0	0	0	0	0.0651367	0	0	0	0	0	0	0
gene:11238	CA5B	0.634726	0.704211	0.29537	1.32448	1.59902	1.77987	1.98768	1.91175	1.55352	1.62507	1.34622	1.43152
gene:765	CA6	0	0	0	0	0	0	0	0	0	0	0	0
gene:766	CA7	14.4868	18.4274	16.553	6.1333	4.72876	5.08101	4.17448	5.58689	4.86941	5.19716	4.8175	4.08062
gene:767	CA8	1.57899	1.00015	1.12611	1.48323	0.931079	0.512141	0.617783	0.491656	0.474095	0.87967	0.673047	0.553389
gene:768	CA9	0.346432	0.719649	0.384567	0.272959	0.360842	0.576135	0.505948	0.334992	0.284711	0.443559	0.129821	0.596336
gene:79886	CAAP1	9.18885	8.2471	9.53856	5.90409	7.31968	7.00436	7.40452	8.70618	7.7447	6.5601	6.47034	6.80777
gene:51719	CAB39	38.7046	36.7661	36.721	40.3718	39.1843	37.3118	31.7019	33.8054	34.7769	39.3625	40.8542	32.4448
gene:81617	CAB39L	4.74708	3.73139	3.83043	1.18825	0.94896	1.173	1.47821	1.1916	1.70289	1.27167	1.52419	1.05139
gene:219621	CABCOCO1	0	0	0	0	0	0.0233405	0.028024	0.0299947	0	0	0	0
gene:23523	CABIN1	10.4104	10.7853	11.1822	9.42167	10.2474	9.02347	11.2302	10.8636	9.88648	10.0434	9.80054	10.0649
gene:91768	CABLES1	8.02045	8.47825	7.18583	7.71327	7.68109	7.43862	6.19166	7.45738	7.57172	8.86415	8.64268	8.0318
gene:81928	CABLES2	3.5956	4.0643	3.64399	9.88836	8.97965	9.16808	8.57072	8.36747	7.73766	10.3076	9.29	9.90632
gene:9478	CABP1	0.852482	0.93619	0.864907	2.94331	2.45129	1.96359	2.39225	2.84328	2.09357	2.33017	1.58635	2.0205
gene:57010	CABP4	0.010371	0.0608795	0	0	0	0.0139696	0.0501	0.0192011	0	0	0	0.0271036
gene:56344	CABP5	0	0	0.0296257	0	0	0	0	0	0	0	0	0
gene:164633	CABP7	0.037234	0.0449799	0.106765	0	0.0953052	0.0260995	0.075407	0.0791221	0.0351462	0.057484	0.135371	0.0896696
gene:85438	CABS1	0	0	0	0	0	0	0	0	0	0	0	0
gene:26256	CABYR	0.345013	0.413785	0.421183	0.313329	0.317969	0.661252	0.601601	0.541602	0.543182	0.446793	0.623453	1.06259
gene:11094	CACFD1	16.2873	16.7923	16.1719	6.63588	6.66668	6.72555	6.38256	7.03521	6.02686	6.69439	7.44075	6.23521
gene:57685	CACHD1	1.63298	1.6554	1.55142	4.73609	4.38458	4.06563	3.95478	3.90682	3.76598	4.77473	4.90828	4.24175
gene:773	CACNA1A	1.75481	1.47071	2.79625	1.55155	1.02743	0.836146	1.46275	0.734433	1.63288	0.903655	0.809623	1.19259
gene:774	CACNA1B	0.024598	0.037692	0.0233334	0.053238	0.00971367	0.0189027	0.034435	0.0257662	0	0.04756	0.0451984	0.0396508
gene:775	CACNA1C	0.275062	0.124535	0.139762	0.131074	0.136731	0.203298	0.193929	0.110955	0.0808182	0.09979	0.0628217	0.095762
gene:776	CACNA1D	8.07895	7.45744	7.58588	4.06564	4.0158	3.86054	4.02844	3.66314	3.55792	4.61318	3.55424	4.12059
gene:777	CACNA1E	0	0.0102048	0.0117403	0.006216	0.00346059	0.00333909	0	0.00412548	0.0119429	0	0	0.00332823
gene:778	CACNA1F	0.045053	0.0816149	0.0655445	0.038673	0.0364176	0.0767055	0.015041	0.0162365	0.0457532	0.096176	0.0466072	0
gene:8913	CACNA1G	0.035367	0.0285576	0.0226242	0.649793	0.336103	0.365471	0.262338	0.264784	0.24695	0.323585	0.355543	0.378896
gene:8912	CACNA1H	0.595303	0.988336	0.657042	0.507862	0.458865	0.52888	0.498632	0.429624	0.366072	0.63127	0.413181	0.484016
gene:8911	CACNA1I	0	0	0.0178239	0.016186	0.0173288	0.0125599	0.010405	0	0	0.018935	0	0.0100344
gene:779	CACNA1S	0.005805	0	0	0	0	0	0	0	0	0	0	0
gene:781	CACNA2D1	0.666012	0.421432	0.648417	0.303761	0.195338	0.306444	0.227456	0.242251	0.255438	0.173547	0.21857	0.195293
gene:9254	CACNA2D2	0.124972	0.0797135	0.0375217	0.087152	0.148353	0.07579	0.178784	0.126462	0.244113	0.135163	0.23343	0.118707
gene:55799	CACNA2D3	0.013678	0.0146859	0	0	0.0149979	0	0	0	0	0	0	0
gene:93589	CACNA2D4	0.033641	0.030405	0	0.013459	0.0134979	0.0212922	0	0.158528	0	0	0.0424023	0.0156241
gene:782	CACNB1	0.334366	0.848013	0.555003	1.44351	2.21768	2.12038	2.51106	2.41464	1.78128	1.61906	1.92849	1.89185
gene:783	CACNB2	1.1851	1.01169	1.55895	0.643826	0.56397	0.667677	0.927155	0.574305	0.558784	0.53005	0.413606	1.03481
gene:784	CACNB3	3.28602	4.56922	3.97887	5.38501	4.19744	5.43108	5.75849	6.61117	4.89835	4.57353	4.33731	6.28857
gene:785	CACNB4	0.144276	0.135372	0.0660694	0.100929	0.0867212	0.101126	0.03791	0.139521	0.17771	0.102462	0.0702789	0.126892
gene:786	CACNG1	0	0	0	0	0	0	0	0	0	0.033384	0	0.0399706
gene:27092	CACNG4	0.541986	0.805592	0.399527	0.305726	0.336389	0.378008	0.199835	0.32425	0.405385	0.212193	0.323757	0.253348
gene:27091	CACNG5	0	0.00527876	0	0	0	0	0	0.00970405	0	0	0	0
gene:59285	CACNG6	0	0	0	0	0	0	0	0	0.0346503	0	0	0
gene:59284	CACNG7	0	0	0	0	0.0900567	0	0	0	0	0	0	0.020179
gene:59283	CACNG8	0	0	0	0	0	0	0.012786	0.0109006	0	0	0	0
gene:58509	CACTIN	6.69378	7.0754	6.71655	13.4431	12.2445	12.2071	12.5808	11.6431	10.9575	13.7613	11.601	14.1504
gene:143384	CACUL1	5.87236	5.33592	4.80898	10.6778	11.2346	10.4735	9.50569	9.89297	9.53698	10.3468	10.4064	9.92495
gene:27101	CACYBP	11.814	11.7127	11.4056	21.8867	22.8071	25.173	19.869	19.0715	19.337	22.82	23.606	21.4922
gene:790	CAD	2.04083	1.79491	2.33279	1.43584	1.41785	1.59122	1.42797	1.51565	1.50844	1.49384	1.44802	1.47684
gene:23705	CADM1	1.53702	1.3767	0.887854	1.83051	1.88057	2.14829	2.35475	2.1208	2.31274	2.01235	2.60109	2.24439
gene:253559	CADM2	0.043786	0.12248	0.255079	0.305688	0.162932	0.15752	0.235256	0.0633016	0.0374662	0.20614	0.0683571	0.135873
gene:57863	CADM3	0	0	0	0.033086	0.0495095	0.0227146	0.018117	0.0265338	0	0.010038	0.0345829	0.00892992
gene:199731	CADM4	1.41162	1.56881	1.49034	3.99028	3.69235	4.20899	4.32747	4.05915	3.99636	3.71548	3.64089	4.01374
gene:8618	CADPS	7.91353	9.03413	8.52796	7.51477	8.19955	6.93452	7.85067	8.54796	8.12098	7.03622	7.055	6.61616
gene:93664	CADPS2	6.10035	6.029	6.79732	4.84396	4.60358	3.79672	3.71252	3.9057	3.5979	4.22587	4.21761	4.17548
gene:285782	CAGE1	0.058312	0.0615568	0.0428377	0.04958	0	0.020445	0.09009	0.0187573	0.0847651	0.032834	0.0337125	0.0409439
gene:793	CALB1	0	0.0231595	0	0.04168	0.00804493	0.00892634	0.047988	0.0412083	0	0.010161	0.0428429	0.0103413
gene:794	CALB2	0.091111	0.0930033	0.147232	0.149826	0.0573211	0.184752	0.295188	0.141133	0.0768134	0.231076	0.129129	0.0374538
gene:796	CALCA	0.022627	0.121409	0	0.489412	0.248521	0.397372	0.115572	0.154664	0.116209	0.051904	0.222874	0.354949
gene:797	CALCB	0	0	0	0.081673	0.0478169	0.0216461	0	0.0227263	0	0	0	0
gene:57658	CALCOCO1	20.4798	21.4389	20.8961	45.8204	45.4266	45.9703	45.1983	40.1841	40.1582	49.7858	42.2259	47.8453
gene:10241	CALCOCO2	41.6289	40.6386	42.6072	44.6503	44.341	42.859	41.0724	42.5081	43.5965	43.9517	40.8986	41.8547
gene:799	CALCR	0.028291	0.0380073	0.0295985	0	0.0351757	0	0	0.0134016	0	0.018125	0.0120047	0.0113583
gene:10203	CALCRL	0	0	0.00853067	0	0	0	0	0	0	0	0	0
gene:800	CALD1	0.884712	0.901499	0.652804	1.21257	1.19142	1.14074	1.65491	1.65872	2.18049	1.1203	0.955589	1.24617
gene:255022	CALHM1	0	0	0	0	0	0	0.017143	0	0	0	0.017453	0
gene:51063	CALHM2	0.2254	0.13593	0.250846	0.209068	0.252957	0.321974	0.341467	0.263343	0.120803	0.110876	0.0679557	0.2047
gene:119395	CALHM3	0	0.0270369	0.0302291	0	0	0	0	0	0.0339167	0	0	0
gene:254228	CALHM5	0	0	0	0	0	0	0.0058	0	0	0	0	0
gene:441168	CALHM6	0	0	0.0465913	0	0	0	0	0	0	0	0	0
gene:801	CALM1	134.458	129.2	131.326	145.837	142.829	140.039	151.082	146.575	152.672	141.47	146.997	142.09
[truncated: 15,720 more rows]
