# Supplementary material for: Using integrated transcriptomics and metabolomics to explore the effects of infant formula on the growth and development of small intestinal organoids
Source: Royal Society of Chemistry journal article supplement (doi:10.1039/d4fo01723d), 2024-01-01
Supplement: d4fo01723d3.xlsx [file d4fo01723d3.xlsx]

## Sheet: Sheet1
Table S4. Profile of 1082 metabolites identified.
ID	m/z	rt(s)	Name	HMDB	KEGG	SuperClass	Class	SubClass	DN-1	DN-2	DN-3	D7-1	D7-2	D7-3	D8-1	D8-2	D8-3	D9-1	D9-2	D9-3
M196T184	196.083	183.646	(-)-.alpha.-kainic acid	HMDB0001431	C12819	Organic acids and derivatives	Carboxylic acids and derivatives	Amino acids, peptides, and analogues	3.10756e+06	4.91687e+06	2625856	4.64739e+06	599586	4.95691e+06	3.07567e+06	779421	575663	3.81632e+06	3.45802e+06	3.45871e+06
M155T423	155.082	422.819	(-)-corey lactone diol			Organoheterocyclic compounds	Lactones	Gamma butyrolactones	2.45234e+06	1.20829e+06	1.5318e+06	1.31006e+06	1.63958e+06	2.7099e+06	2.36047e+06	1.66072e+06	1.58383e+06	1.5063e+06	2.30302e+06	1.65229e+06
M289T62	289.087	62.3107	(+)-catechin	HMDB0002780	C06562	Phenylpropanoids and polyketides	Flavonoids	Flavans	488566	698849	417162	298750	451657	381814	382949	381354	276490	358981	226217	342670
M177T455	176.962	455.352	(2,6-dichlorophenoxy)acetic acid, methyl ester			Benzenoids	Benzene and substituted derivatives	Phenoxyacetic acid derivatives	1.54865e+06	2.28995e+06	1.5878e+06	1.27135e+06	2.03901e+06	1.55601e+06	1.98505e+06	2.43195e+06	2.55446e+06	1.60423e+06	2.03378e+06	1.42471e+06
M699T38_1	698.514	37.928	(2-aminoethoxy)[2-[hexadec-9-enoyloxy]-3-[octadeca-1.11-dien-1-yloxy]propoxy]phosphinic acid	HMDB0011405		Lipids and lipid-like molecules	Glycerophospholipids	Glycerophosphoethanolamines	2.68178e+06	3.12801e+06	2.46893e+06	3.33093e+06	3.1604e+06	3.3443e+06	3.78133e+06	3.2558e+06	3.45533e+06	3.58944e+06	3.23395e+06	3.59983e+06
M765T63	764.523	62.7411	(2-aminoethoxy)[2-[icosa-5.8.11.14-tetraenoyloxy]-3-[octadec-11-enoyloxy]propoxy]phosphinic acid	HMDB0009036		Lipids and lipid-like molecules	Glycerophospholipids	Glycerophosphoethanolamines	4.66285e+06	5.56859e+06	1.36843e+07	6.71089e+06	6.52301e+06	6.70623e+06	3.83815e+06	5.83587e+06	5.3397e+06	11674150	7.03078e+06	6.49251e+06
M727T141	726.545	140.83	(2-aminoethoxy)[2-[octadec-9-enoyloxy]-3-[octadeca-1.11-dien-1-yloxy]propoxy]phosphinic acid	HMDB0011408		Lipids and lipid-like molecules	Glycerophospholipids	Glycerophosphoethanolamines	4.43571e+07	5.29883e+07	4.59782e+07	4.7082e+07	4.60161e+07	4.6144e+07	4.75425e+07	4.40036e+07	46048017	5.63364e+07	5.44816e+07	5.0613e+07
M799T146	798.601	145.95	(2-aminoethoxy)[3-[docos-13-enoyloxy]-2-[octadec-9-enoyloxy]propoxy]phosphinic acid	HMDB0009521		Lipids and lipid-like molecules	Glycerophospholipids	Glycerophosphoethanolamines	7.35494e+06	7.34657e+06	9.92495e+06	9.0273e+06	6.40329e+06	5.67028e+06	6.14166e+06	6.85193e+06	5.54965e+06	7.41067e+06	8.8634e+06	7.21276e+06
M672T143	672.498	142.817	(2-aminoethoxy)[3-[hexadec-1-en-1-yloxy]-2-[hexadec-9-enoyloxy]propoxy]phosphinic acid	HMDB0011339		Lipids and lipid-like molecules	Glycerophospholipids	Glycerophosphoethanolamines	2.16539e+07	2.65509e+07	22115239	2.94175e+07	2.78235e+07	2.82407e+07	2.75142e+07	2.52906e+07	2.70259e+07	3.3198e+07	3.28847e+07	3.13652e+07
M723T138	722.513	137.538	(2-aminoethoxy)[3-[hexadec-1-en-1-yloxy]-2-[icosa-5.8.11.14-tetraenoyloxy]propoxy]phosphinic acid	HMDB0011352		Lipids and lipid-like molecules	Glycerophospholipids	Glycerophosphoethanolamines	220217059	213121801	211745863	187087700	195440386	168617560	161046512	145842187	156530345	208924146	205222339	193080880
M164T186	164.056	186.404	(2-mercaptopropionylamino)acetic acid		C12876	Organic acids and derivatives	Carboxylic acids and derivatives	Amino acids, peptides, and analogues	3.0985e+06	4.83167e+06	2.28495e+06	3.53804e+06	4.55885e+06	4.09137e+06	6.02576e+06	4.20678e+06	3.22471e+06	5.9405e+06	3.14413e+06	5.70599e+06
M262T294	262.165	293.779	(2r)-3-hydroxyisovaleroylcarnitine			Lipids and lipid-like molecules	Fatty Acyls	Fatty acid esters	1.60163e+06	1.74607e+06	1.71469e+06	2.66447e+06	2.412e+06	2.78385e+06	2.98559e+06	2.99598e+06	2.90759e+06	3.30624e+06	3.42523e+06	3.52578e+06
M439T370	439.143	370.025	(2r,3s,4s,5r,6r)-5-[(2s,3r,4r)-3,4-dihydroxy-4-(hydroxymethyl)oxolan-2-yl]oxy-2-(hydroxymethyl)-6-(2-phenylethoxy)oxane-3,4-diol			Organic oxygen compounds	Organooxygen compounds	Carbohydrates and carbohydrate conjugates	738518	906490	870944	565347	584696	616230	556798	636428	560975	537771	668131	697609
M493T24	493.337	23.7958	(2s,3r,5r,10r,13r,14s,17s)-2,3,14-trihydroxy-10,13-dimethyl-17-[(2r,3r,5r)-2,3,6-trihydroxy-5,6-dimethylheptan-2-yl]-2,3,4,5,9,11,12,15,16,17-decahydro-1h-cyclopenta[a]phenanthren-6-one			Lipids and lipid-like molecules	Steroids and steroid derivatives	Bile acids, alcohols and derivatives	74909.8	144160	133968	129427	54620.1	109887	67012.9	106674	74055.1	71148	80113.9	35475.4
M311T286_1	310.966	286.206	(3-bromo-5-chloro-2-hydroxyphenyl)phenylmethanone			Benzenoids	Benzene and substituted derivatives	Benzophenones	575913	738336	713193	345782	471425	411166	977725	1.1559e+06	1.03515e+06	1.0001e+06	1.23091e+06	1.63532e+06
M475T159	475.326	159.117	(3r,7r,9s,10s,12s,13r,14s,17r)-17-((2r)-6,7-dihydroxy-6-methylheptan-2-yl)-10,13-dimethylhexadecahydro-1h-cyclopenta[a]phenanthrene-3,7,12-triol	HMDB0002180		Lipids and lipid-like molecules	Steroids and steroid derivatives	Bile acids, alcohols and derivatives	317834	387948	325978	401340	254426	450919	622842	638906	427270	348176	306709	427340
M365T434_2	365.106	433.769	(7e,13e)-9,15-dihydroxy-4,10,16-trimethyl-1,5,11-trioxacyclohexadeca-7,13-diene-2,6,12-trione						269648	392339	397288	399720	527242	524270	575583	613773	910006	617072	623626	627131
M109T33_2	109.101	33.0123	(cis+trans)-nerodilol		C09704	Lipids and lipid-like molecules	Prenol lipids	Sesquiterpenoids	12867062	2.7709e+07	1.56186e+07	1.49098e+07	8.46445e+06	15098910	1.82386e+07	8.10274e+06	16168608	8.14823e+06	9.50471e+06	1.02947e+07
M83T150	83.0856	150.445	(e)-4-hexen-1-ol			Lipids and lipid-like molecules	Fatty Acyls	Fatty alcohols	2.76118e+07	1.00412e+07	25214141	2.56581e+07	2.23447e+07	2.01892e+07	2.86396e+07	2.70036e+07	2.78096e+07	2.6283e+07	2.76903e+07	26030790
M362T38	362.327	38.1523	(r)-(+)-arachidonyl-1'-hydroxy-2'-propylamide			Lipids and lipid-like molecules	Fatty Acyls	Fatty amides	539012	790557	900113	821575	420975	1.02404e+06	622770	355007	952313	362826	580096	1.14007e+06
M102T416	102.056	416.005	(S)-2-aminobutyric acid	HMDB0000452	C02356	Organic acids and derivatives	Carboxylic acids and derivatives	"Amino acids, peptides, and analogues"	179001	206438	197332	208339	205298	189584	184687	165473	196371	183992	173826	195301
M329T138	329.249	137.541	(z)-9,12,13-trihydroxyoctadec-15-enoic acid			Lipids and lipid-like molecules	Fatty Acyls	Fatty acids and conjugates	2.60404e+06	2.76003e+06	2.70807e+06	2.63608e+06	3.04855e+06	2.40208e+06	2.22704e+06	2.26138e+06	2.60988e+06	2.68002e+06	2.69826e+06	2.62053e+06
M421T350	421.066	349.883	.alpha.,.alpha.'-trehalose 6-phosphate	HMDB0001124	C00689	Organic oxygen compounds	Organooxygen compounds	Carbohydrates and carbohydrate conjugates	1.26881e+06	1.13906e+06	1.23501e+06	1.31688e+06	1.48045e+06	1.4302e+06	1.53211e+06	1.39126e+06	1.28597e+06	1.32205e+06	1.47075e+06	1.4581e+06
M241T434	241.012	433.928	.alpha.-d-galactose 1-phosphate	HMDB0000645	C00446	Organic oxygen compounds	Organooxygen compounds	Carbohydrates and carbohydrate conjugates	2.53266e+06	2.71382e+06	1.8155e+06	2.06533e+06	1.57315e+06	2.13838e+06	2.34323e+06	1.95552e+06	1.23496e+06	1.88686e+06	2.08324e+06	2.49649e+06
M102T387	102.055	386.898	.alpha.-guanidinoglutaric acid			Organic acids and derivatives	Carboxylic acids and derivatives	Amino acids, peptides, and analogues	3.85147e+06	5.71637e+06	5.00172e+06	2.29199e+06	3.15233e+06	3.02012e+06	2.86868e+06	3.55443e+06	3.45012e+06	2.95901e+06	3.33724e+06	3.77147e+06
M175T674	175.149	674.179	.alpha.-ionone	HMDB0059883	C12286	Lipids and lipid-like molecules	Prenol lipids	Sesquiterpenoids	2.19133e+06	2.57423e+06	1.42569e+06	2.43218e+06	2.02069e+06	1.58051e+06	2.28769e+06	3.59309e+06	1.3263e+06	2.44163e+06	5.82543e+06	2.382e+06
M261T388	261.073	387.785	.alpha.-L-Glu-L-Asp	HMDB0028815		Organic acids and derivatives	Peptidomimetics	Hybrid peptides	2.79608e+06	3.91725e+06	3.25029e+06	915425	1.07417e+06	1.12042e+06	983452	1.15452e+06	1.01225e+06	1.01367e+06	1.22226e+06	1.2907e+06
M158T126	158.096	126.485	.alpha.-methyltryptamine		C20127	Organoheterocyclic compounds	Indoles and derivatives	Indoles	567339	212014	275740	1.0341e+06	2.08979e+06	1.14489e+06	1.0425e+06	1.13741e+06	1.31799e+06	580241	336315	657423
M171T37_1	171.103	36.6495	.beta.-glycerophosphate	HMDB0002520	C02979	Lipids and lipid-like molecules	Glycerophospholipids	Glycerophosphates	2.34582e+06	5.20464e+06	2.91425e+06	2.60882e+06	2.30628e+06	3.13939e+06	1.99672e+06	5.49435e+06	2.40906e+06	2.91526e+06	2.86467e+06	2.46348e+06
M355T34	355.284	34.0388	.beta.-muricholic acid	HMDB0000415	C17726	Lipids and lipid-like molecules	Steroids and steroid derivatives	Bile acids, alcohols and derivatives	4.28383e+07	4.14679e+07	223855	4.26241e+07	4.32948e+07	4.21158e+07	4.77525e+07	50614020	4.4887e+07	5.55439e+07	4.74827e+07	4.67315e+07
M664T422	664.117	422.144	.beta.-nicotinamide adenine dinucleotide(NAD)	HMDB0000902	C00003				817122	2.03205e+06	892669	1.6103e+06	1.26446e+06	1.73883e+06	2.44131e+06	4.0568e+06	1.86444e+06	2.82069e+06	832726	3.41806e+06
M181T32_2	181.159	32.3574	.delta.-dodecalactone	HMDB0037742		Organoheterocyclic compounds	Lactones	Delta valerolactones	8.98752e+06	7.2614e+06	4.43833e+06	6.11318e+06	3.19485e+06	4.73334e+06	3.5016e+06	3.52802e+06	5.98882e+06	2.3258e+06	4.18374e+06	4.90456e+06
M102T185_3	102.02	184.593	.gamma.-aminobutyric acid	HMDB0000112	C00334	Organic acids and derivatives	Carboxylic acids and derivatives	Amino acids, peptides, and analogues	2.40878e+06	2.61114e+06	2.71344e+06	2.15448e+06	2.85879e+06	2.20441e+06	2.9966e+06	2.27562e+06	3.43175e+06	2.93131e+06	2.46412e+06	2.73243e+06
M163T32_2	163.148	32.2914	.gamma.-dodecalactone	HMDB0031683		Organoheterocyclic compounds	Lactones	Gamma butyrolactones	1.49069e+07	1.20986e+07	6.87176e+06	9.31319e+06	5.66014e+06	8.11138e+06	6.15816e+06	5.93497e+06	9.38442e+06	3.72927e+06	7.46636e+06	8.594e+06
M355T190	355.263	190.469	.gamma.-muricholic acid		C17649	Lipids and lipid-like molecules	Steroids and steroid derivatives	Bile acids, alcohols and derivatives	76062.1	11621.8	30007.8	9.01095e+06	1.11244e+07	8.0587e+06	8.00218e+06	1.01942e+07	14758269	1.21513e+07	1.18217e+07	1.07757e+07
M167T150	167.154	150.176	.gamma.-undecalactone	HMDB0038311	C08571	Organoheterocyclic compounds	Lactones	Gamma butyrolactones	4.83081e+06	5.43547e+06	6.35285e+06	4.96064e+06	7.39237e+06	5.3323e+06	5.81187e+06	5.80885e+06	3.50302e+06	1.22378e+07	5.09866e+06	5.92305e+06
M776T80	775.55	80.0945	[2.3-dihydroxypropoxy][3-[octadec-9-enoyloxy]-2-(octadecanoyloxy)propoxy]phosphinic acid	HMDB0010632		Lipids and lipid-like molecules	Glycerophospholipids	Glycerophosphoglycerols	2.33052e+07	4.19688e+07	2.53494e+07	2.99032e+07	4.76155e+07	3.25262e+07	2.86489e+07	3.49086e+07	1.88024e+07	4.93635e+07	41571533	3.80829e+07
M702T187	701.513	187.212	[3-[octadec-11-enoyloxy]-2-(octadecanoyloxy)propoxy]phosphonic acid	HMDB0114901		Lipids and lipid-like molecules	Glycerophospholipids	Glycerophosphates	3.63968e+06	5.07305e+06	3.91951e+06	2.97215e+06	2.51766e+06	2.64969e+06	2.58495e+06	2.66473e+06	2.67376e+06	4.14134e+06	3.8354e+06	2.15195e+06
M388T31	388.156	30.9114	[5-chloro-3-[(1e,3e)-3,5-dimethylhepta-1,3-dienyl]-7-methyl-6,8-dioxo-2h-isoquinolin-7-yl] acetate						296376	478404	556429	236345	402083	440667	308221	443480	494097	309243	535916	471817
M293T37	293.176	36.5191	[6]-gingerol		C10462	Benzenoids	Phenols	Methoxyphenols	11402171	1.22634e+07	7.53571e+06	1.0832e+07	8.64283e+06	8.45336e+06	7.50024e+06	7.75794e+06	9.86818e+06	7.81e+06	7.07682e+06	6.93546e+06
M480T177	480.345	176.645	1-(1z-hexadecenyl)-sn-glycero-3-phosphocholine	HMDB0010407		Lipids and lipid-like molecules	Glycerophospholipids	Glycerophosphocholines	4.30669e+06	5.05982e+06	3.54715e+06	6.60193e+06	5.00103e+06	5.39919e+06	5.00999e+06	4.72015e+06	5.18163e+06	5.71628e+06	4.79852e+06	5.2467e+06
M819T37	818.606	36.9502	1-(1z-octadecenyl)-2-(4z,7z,10z,13z,16z,19z-docosahexaenoyl)-sn-glycero-3-phosphocholine	HMDB0011262		Lipids and lipid-like molecules	Glycerophospholipids	Glycerophosphocholines	2.90583e+07	38524971	3.70469e+07	2.35176e+07	2.33269e+07	3.41992e+07	3.4284e+07	2.89891e+07	3.47817e+07	3.11305e+07	2.98304e+07	3.49612e+07
M385T34	385.274	33.7221	1-(1z-octadecenyl)-2-(4z,7z,10z,13z,16z,19z-docosahexaenoyl)-sn-glycero-3-phosphoethanolamine						6.40814e+07	7.5124e+07	7.28857e+07	6.55075e+07	5.34371e+07	6.15207e+07	7.39929e+07	6.25051e+07	6.46173e+07	57820502	5.50084e+07	6.15679e+07
M795T37	794.606	36.9851	1-(1z-octadecenyl)-2-(5z,8z,11z,14z-eicosatetraenoyl)-sn-glycero-3-phosphocholine	HMDB0011253		Lipids and lipid-like molecules	Glycerophospholipids	Glycerophosphocholines	8.94253e+07	100658307	9.53475e+07	6.65286e+07	6.65261e+07	7.90665e+07	89000716	7.79257e+07	7.89251e+07	7.94927e+07	7.94354e+07	9.19021e+07
M773T137	772.622	137.201	1-(1z-octadecenyl)-2-(9z-octadecenoyl)-sn-glycero-3-phosphocholine	HMDB0011243		Lipids and lipid-like molecules	Glycerophospholipids	Glycerophosphocholines	131890147	164147923	138305674	225270234	124853059	154433362	152561545	151798814	156652428	168396281	177192867	165967884
M729T143	728.56	143.345	1-(1z-octadecenyl)-2-(9z-octadecenoyl)-sn-glycero-3-phosphoethanolamine	HMDB0011375		Lipids and lipid-like molecules	Glycerophospholipids	Glycerophosphoethanolamines	3.14676e+07	3.64639e+07	2.95931e+07	2.96879e+07	2.71549e+07	2.99572e+07	3.18043e+07	2.8403e+07	3.03357e+07	3.46312e+07	40394536	3.02932e+07
M508T186	508.376	186.225	1-(1z-octadecenyl)-sn-glycero-3-phosphocholine	HMDB0013122		Lipids and lipid-like molecules	Glycerophospholipids	Glycerophosphocholines	1.54645e+07	20242494	1.30961e+07	3.40233e+07	19860300	2.69587e+07	2.33958e+07	7.8608e+06	7.35343e+06	3.70814e+07	2.46891e+07	3.08509e+07
M125T383	125.025	382.746	1,2,3-benzenetriol	HMDB0013674	C01108	Benzenoids	Phenols	Benzenetriols and derivatives	1.19738e+06	1.26491e+06	1296634	911831	929103	835072	1.11953e+06	1.01891e+06	907457	891954	996057	811170
M241T361	241.155	360.644	1,2-benzenediamine, 4-methyl-n1-(3-phenylpropyl)-			Benzenoids	Benzene and substituted derivatives	Phenylpropylamines	905372	1.08925e+06	1.03693e+06	1.04754e+06	981922	1.21358e+06	1.35991e+06	1.18777e+06	1.27607e+06	1.06184e+06	1.13971e+06	1.2467e+06
M566T153	566.382	153.114	1,2-bis(o-decanoyl)-sn-glyceryl-3-phosphorylcholine			Lipids and lipid-like molecules	Glycerophospholipids	Glycerophosphocholines	8.2906e+06	5.21661e+06	1.09238e+07	1.82296e+07	1.46371e+07	1.47039e+07	1.50714e+07	1.24979e+07	1.52768e+07	1.76622e+07	1.57136e+07	1.83647e+07
M899T149	898.726	149.129	1,2-di-(13z-docosenoyl)-sn-glycero-3-phosphocholine	HMDB0008578		Lipids and lipid-like molecules	Glycerophospholipids	Glycerophosphocholines	4.33166e+06	5.87654e+06	4.19251e+06	2.37721e+06	2.70049e+06	2.67922e+06	2.85965e+06	2.74339e+06	1.00621e+06	3.0762e+06	4.34295e+06	2.71384e+06
M72T291	72.0809	291.296	1,2-diamino-2-methylpropane			Organic nitrogen compounds	Organonitrogen compounds	Amines	1.48205e+07	1.51578e+07	19442557	8.86978e+06	1.39516e+07	1.1781e+07	13391413	1.63929e+07	1.94139e+07	1.28534e+07	1.29966e+07	1.3654e+07
M875T186	874.552	185.919	1,2-diarachidonoyl-sn-glycero-3-phosphocholine	HMDB0008443		Lipids and lipid-like molecules	Glycerophospholipids	Glycerophosphocholines	1.74631e+06	1.88461e+06	1.82146e+06	1.36542e+06	2.17553e+06	1.50562e+06	2.11377e+06	1.62491e+06	1.64222e+06	2.50291e+06	1.6613e+06	2.38453e+06
M843T137	842.662	136.551	1,2-dieicosenoyl-sn-glycero-3-phosphocholine	HMDB0008308		Lipids and lipid-like molecules	Glycerophospholipids	Glycerophosphocholines	2.55823e+07	2.19375e+07	1.96529e+07	1.88923e+07	1.25503e+07	1.71713e+07	2.23808e+07	1.61895e+07	1.72232e+07	2.10115e+07	2.07187e+07	20579436
M763T605	762.594	604.929	1,2-diheptadecanoyl-sn-glycero-3-phosphocholine			Lipids and lipid-like molecules	Glycerophospholipids	Glycerophosphocholines	850122	862992	957203	737453	610032	602381	675612	903519	639504	983431	976546	763827
M622T148	622.444	148.373	1,2-dilauroyl-sn-glycero-3-phosphatidylcholine			Lipids and lipid-like molecules	Glycerophospholipids	Glycerophosphocholines	359746	221514	202658	127996689	110429723	109648723	133451361	125168831	128439677	123088610	122830919	127987298
M439T33	439.379	32.6044	1,2-dilauroyl-sn-glycero-3-phosphoethanolamine			Lipids and lipid-like molecules	Glycerophospholipids	Glycerophosphoethanolamines	457846	867283	808038	1.59352e+07	12323045	1.33856e+07	1.33373e+07	12277607	1.20314e+07	1.6268e+07	1.48181e+07	1.60804e+07
M609T36	609.378	35.9698	1,2-dilauroyl-sn-glycero-3-phospho-sn-glycerol			Lipids and lipid-like molecules	Glycerophospholipids	Glycerophosphoglycerols	1.03094e+07	1.08132e+07	1.04061e+07	12532821	1.36224e+07	12011945	1.40358e+07	16711520	1.44583e+07	1.01741e+07	1.52008e+07	1.78021e+07
M600T186_1	599.504	186.234	1,2-dilinoleoylglycerol			Lipids and lipid-like molecules	Fatty Acyls	Lineolic acids and derivatives	2.82388e+07	2.86504e+07	3.1457e+07	2.91664e+07	2.96647e+07	2.95112e+07	2.86724e+07	2.60094e+07	2.75412e+07	3.18889e+07	3.25649e+07	3.09478e+07
M495T194	495.441	194.284	1,2-dimyristoyl-sn-glycerol	HMDB0007008		Lipids and lipid-like molecules	Glycerolipids	Diradylglycerols	91086.8	90443.3	73515.1	7.90834e+06	6.62841e+06	7.70299e+06	6.06179e+06	5.82948e+06	6.40952e+06	7.31633e+06	7.63381e+06	6.8337e+06
M699T39	699.493	38.5625	1,2-dioleoyl-sn-glycero-3-phosphate	HMDB0007865		Lipids and lipid-like molecules	Glycerophospholipids	Glycerophosphates	3.17091e+06	3.3398e+06	3.908e+06	2.17966e+06	2.11833e+06	1.9762e+06	2.1644e+06	2.53236e+06	2.5728e+06	2.17008e+06	2.21193e+06	2.24099e+06
M787T138	786.6	137.736	1,2-dioleoyl-sn-glycero-3-phosphatidylcholine	HMDB0062690		Lipids and lipid-like molecules	Glycerophospholipids	Glycerophosphocholines	2127293078	1952440879	1975412680	1654757727	1472410040	1728564583	1798487480	1639200483	1667136764	1717784498	1719175636	1744197099
M745T144	744.554	143.791	1,2-dioleoyl-sn-glycero-3-phosphoethanolamine	HMDB0009059		Lipids and lipid-like molecules	Glycerophospholipids	Glycerophosphoethanolamines	269937600	290479560	257198668	289036449	245432611	273264742	282807132	286030394	271029508	323889918	300461684	288968839
M771T142	770.57	142.135	1,2-dioleoyl-sn-glycero-3-phosphoethanolamine-n,n-dimethyl	HMDB0010564		Lipids and lipid-like molecules	Glycerophospholipids	Glycerophosphoethanolamines	1.8674e+07	1.78608e+07	15563515	3.744e+07	39868009	2.18586e+07	22399599	4.41619e+07	17919489	17834825	1.9885e+07	2.30297e+07
M757T143	756.554	142.954	1,2-dioleoyl-sn-glycero-3-phosphoethanolamine-n-methyl	HMDB0010565		Lipids and lipid-like molecules	Glycerophospholipids	Glycerophosphoethanolamines	8.00334e+06	9.07654e+06	8.01897e+06	8.95823e+06	9.4031e+06	9.09018e+06	8.63011e+06	7.93352e+06	7.28025e+06	1.01806e+07	8.52336e+06	9.25286e+06
M787T185	786.53	185.225	1,2-dioleoyl-sn-glycero-3-phospho-l-serine	HMDB0012390		Lipids and lipid-like molecules	Glycerophospholipids	Glycerophosphoserines	1.81496e+07	2.0026e+07	1.90117e+07	1.09562e+07	1.24181e+07	1.25172e+07	1.17954e+07	1.17312e+07	1.31158e+07	1.43213e+07	1.27677e+07	1.4486e+07
M604T144	603.535	143.828	1,2-dioleoyl-sn-glycerol	HMDB0007218		Lipids and lipid-like molecules	Glycerolipids	Diradylglycerols	186410983	194702900	177641025	216907225	172113856	257711270	205129672	214555652	189219080	223732476	216421565	227472197
M731T141	730.538	141.154	1,2-dipalmitoleoyl-sn-glycero-3-phosphocholine	HMDB0008002		Lipids and lipid-like molecules	Glycerophospholipids	Glycerophosphocholines	296783117	294767366	293957413	303172827	294721133	312293596	330180192	351597934	313198513	314557704	313677037	306870618
M746T30	745.503	30.193	1,2-dipalmitoyl-sn-glycero-3-phospho-(1'-rac-glycerol)			Lipids and lipid-like molecules	Glycerophospholipids	Glycerophosphoglycerols	1.62832e+06	2.08393e+06	3.30488e+06	1.63666e+06	1.27905e+06	1.78275e+06	2.60344e+06	1.31553e+06	1.34915e+06	1.49886e+06	1.22009e+06	1.43736e+06
M704T27	703.519	27.4358	1,2-Distearoyl-sn-glycerol 3-phosphate(PA(18:0/18:0))						357661	124047	269968	45959.8	54971.6	379873	349555	378756	385468	613583	640745	685562
M679T144	678.507	144.494	1,2-ditetradecanoyl-sn-glycero-3-phosphocholine	HMDB0007866		Lipids and lipid-like molecules	Glycerophospholipids	Glycerophosphocholines	227967039	230978715	249188305	480705249	499019191	387229635	479335258	455333524	488528234	487137248	527006547	449650122
M473T301	473.135	300.515	1,2-dithiolane-3-pentanamide, n,n'-1,3-propanediylbis-			Organoheterocyclic compounds	Dithiolanes	Lipoamides	916488	868903	815495	613789	1.64004e+06	861599	1.25156e+06	1.68789e+06	1.64868e+06	990304	787499	1.52993e+06
M259T37	259.152	36.8515	1,3-benzenediol, 5-methyl-4-[(1r,6r)-3-methyl-6-(1-methylethenyl)-2-cyclohexen-1-yl]-			Lipids and lipid-like molecules	Prenol lipids	Monoterpenoids	8.48987e+06	9.89085e+06	6.61375e+06	1.21568e+07	4.41918e+06	1.16504e+07	1.61227e+07	7.9711e+06	1.22455e+07	1.16341e+07	9.6127e+06	1.34562e+07
M155T24_1	155.071	23.9283	1,3-cyclohexanedicarboxylic acid			Organic acids and derivatives	Carboxylic acids and derivatives	Dicarboxylic acids and derivatives	673085	634462	685919	363353	794150	770762	292262	726176	550119	700572	46496.5	836652
M341T357	341.109	356.908	1,4-d-xylobiose		C01630	Organic oxygen compounds	Organooxygen compounds	Carbohydrates and carbohydrate conjugates	1.53179e+06	1.43291e+06	1.40598e+06	1.95248e+06	1.82157e+06	1.90937e+06	1.76321e+06	1.67097e+06	1.7776e+06	2.13829e+06	2.06553e+06	1.90009e+06
M81T33	81.07	32.8025	1,5-hexadien-3-ol			Organic oxygen compounds	Organooxygen compounds	Alcohols and polyols	1.55275e+07	1.68958e+07	1.26028e+07	1.27225e+07	9.71733e+06	1.23161e+07	1.38227e+07	8.80392e+06	1.2924e+07	7.99312e+06	1.03744e+07	1.17281e+07
M481T26	481.3	25.7648	1.alpha.-methyl-5.alpha.-androstan-3.alpha.,17.beta.-diol glucuronide						288940	332247	340468	283927	264013	339760	290917	295598	210187	289730	273448	299864
M369T429	369.007	428.534	1-.beta.-d-arabinofuranosyluracil 5'-monophosphate			Nucleosides, nucleotides, and analogues	Pyrimidine nucleotides	Pyrimidine ribonucleotides	2.95688e+06	3.00633e+06	3.69776e+06	1.46054e+06	2.74992e+06	1.50787e+06	2.42363e+06	2.7191e+06	3.34947e+06	2.47206e+06	2.7241e+06	2.60034e+06
M505T219	505.249	218.68	11.alpha.-hydroxyprogesterone .beta.-d-glucuronide			Lipids and lipid-like molecules	Steroids and steroid derivatives	Steroidal glycosides	710202	790955	680250	280877	201841	307845	182934	143574	134695	261989	258221	230571
M513T27	513.31	27.0833	11-ketofusidic acid			Lipids and lipid-like molecules	Steroids and steroid derivatives	Steroid esters	99071.5	207510	90650.6	113163	36136.9	30486	288276	61549.6	51881.4	159384	79737.8	77726.8
M295T37_1	295.228	36.6268	12(13)-epoxy-9z-octadecenoic acid	HMDB0004702		Lipids and lipid-like molecules	Fatty Acyls	Fatty acids and conjugates	2.41696e+06	1.39886e+06	1.13117e+06	1.31033e+07	5.71109e+06	7.08612e+06	3.25889e+06	6.21287e+06	5.62665e+06	6.76627e+06	6.62261e+06	7.02113e+06
M299T81	299.259	81.2271	13-hydroxy-9z,11e-octadecadienoic acid	HMDB0112194		Lipids and lipid-like molecules	Fatty Acyls	Lineolic acids and derivatives	614847	959488	1.12524e+06	1.21313e+06	890327	949963	910912	697640	1.05094e+06	702425	969969	657211
M378T157	378.321	156.524	15(s)-15-methylprostaglandin f2.alpha. ethylamide						172095	120124	137208	216172	502415	181332	628315	687813	444058	342555	128696	555498
M365T24_2	365.237	23.6681	15-cyclohexylpentanorprostaglandin f2.alpha.			Lipids and lipid-like molecules	Fatty Acyls	Eicosanoids	180084	96979.5	106502	148776	210159	91749.3	115287	88786.4	91756.7	216990	82438.3	100228
M284T124	284.331	123.862	15-deoxy-goyazensolide			Organoheterocyclic compounds	Lactones	Gamma butyrolactones	2.44602e+07	6.9813e+06	6.6369e+06	1.5432e+07	8.38907e+06	6.86439e+06	1.70673e+07	8.32484e+06	1.14929e+07	1.52165e+07	6.61564e+06	5.52627e+06
M271T69	271.228	69.2434	16-hydroxyhexadecanoic acid	HMDB0006294	C18218	Lipids and lipid-like molecules	Fatty Acyls	Fatty acids and conjugates	1.07296e+07	9.16711e+06	5.93583e+06	1.25574e+07	1.44637e+07	1.41556e+07	1.12453e+07	8.49131e+06	1.24997e+07	10489613	1.08521e+07	1.5432e+07
M367T163	367.284	163.253	17,20-dimethylprostaglandin f1.alpha.			Lipids and lipid-like molecules	Fatty Acyls	Eicosanoids	563069	611864	758746	1.45152e+06	2.00859e+06	1.4855e+06	874590	1.15375e+06	2.16778e+06	990083	2.32881e+06	1.13685e+06
M481T105	481.262	105.109	17-trifluoromethylphenyltrinorprostaglandin f2.alpha. isopropyl ester			Lipids and lipid-like molecules	Fatty Acyls	Eicosanoids	814129	1.20531e+06	1.40831e+06	1.60137e+06	67665.8	637174	488735	811173	337967	1.32295e+06	539137	598803
M111T184	111.055	184.389	1-acetylimidazole		C02560	Organoheterocyclic compounds	Azoles	Imidazoles	3.18762e+06	3.12851e+06	3.58049e+06	2.70739e+06	2.377e+06	2.74668e+06	2.19608e+06	1.77499e+06	1.95675e+06	2.3494e+06	3.22955e+06	2.32695e+06
M412T197	412.246	196.781	1-decanoyl-2-hydroxy-sn-glycero-3-phosphocholine			Lipids and lipid-like molecules	Glycerophospholipids	Glycerophosphocholines	1.24562e+06	825713	2.02537e+06	1.46058e+06	4.99904e+06	4.58657e+06	5.52573e+06	6.29756e+06	2.20332e+06	6.5636e+06	1.77944e+06	7.38309e+06
M85T247	85.0285	246.887	1h-1,2,4-triazol-3-amine		C11261	Organoheterocyclic compounds	Azoles	Triazoles	465151	425960	500911	1.52324e+06	1.59597e+06	1.74258e+06	1.75764e+06	2.04624e+06	1.65033e+06	1.41645e+06	1.35695e+06	2.13655e+06
M510T184	510.356	183.758	1-heptadecanoyl-sn-glycero-3-phosphocholine	HMDB0012108		Lipids and lipid-like molecules	Glycerophospholipids	Glycerophosphocholines	4.47277e+06	6.48903e+06	4.52043e+06	6.60203e+06	2.5563e+06	5.96739e+06	3.35396e+06	2.51041e+06	1.72019e+06	6.37095e+06	5.21524e+06	5.33496e+06
M673T168	673.482	168.259	1-Hexadecanoyl-2-(9Z-octadecenoyl)-sn-glycero-3-phosphoric acid						4.13181e+06	6.51019e+06	4.50044e+06	3.84574e+06	1.0297e+06	698586	3.06521e+06	2.91293e+06	773069	4.5536e+06	1.08548e+06	3.77767e+06
M409T154	409.236	154.101	1-hexadecanoyl-2-sn-glycero-3-phosphate			Lipids and lipid-like molecules	Glycerophospholipids	Glycerophosphates	348821	326241	466165	740609	541741	395048	557251	539897	702783	577273	388975	774433
M769T37	768.59	37.0925	1-hexadecyl-2-(5z,8z,11z,14z-eicosatetraenoyl)-sn-glycero-3-phosphocholine			Lipids and lipid-like molecules	Glycerophospholipids	Glycerophosphocholines	105655005	117992676	123321107	6.44885e+07	6.19573e+07	7.11556e+07	7.63463e+07	6.55217e+07	7.00291e+07	7.95697e+07	7.89004e+07	8.44431e+07
M747T140	746.606	139.832	1-hexadecyl-2-(9z-octadecenoyl)-sn-glycero-3-phosphocholine			Lipids and lipid-like molecules	Glycerophospholipids	Glycerophosphocholines	619233591	593473908	552999125	551933914	310800735	589159662	314142113	400563715	354943230	457553360	457971071	725228590
M242T137	242.284	137.155	1-hexadecylamine			Organic nitrogen compounds	Organonitrogen compounds	Amines	1.96898e+06	1.80168e+06	1.81093e+06	3.62575e+06	4.15563e+06	2.80446e+06	3.56855e+06	4024690	3.82415e+06	2.89016e+06	3.25899e+06	3.14449e+06
M482T188_2	482.36	188.357	1-hexadecyl-sn-glycero-3-phosphocholine			Lipids and lipid-like molecules	Glycerophospholipids	Glycerophosphocholines	5.00713e+07	6.72536e+07	4.23031e+07	7.09892e+07	5.5811e+07	6.59557e+07	5.67762e+07	4.34561e+07	4.15652e+07	8.46714e+07	6.11331e+07	8.03772e+07
M568T426	568.185	426.325	1h-indole-5-sulfonamide, n-(3-chlorophenyl)-3-[[3,5-dimethyl-4-[(4-methyl-1-piperazinyl)carbonyl]-1h-pyrrol-2-yl]methylene]-2,3-dihydro-n-methyl-2-oxo-, (3z)-			Benzenoids	Benzene and substituted derivatives	Sulfanilides	1.28482e+06	1.52509e+06	1.71577e+06	739486	704290	534831	791826	1.39487e+06	950643	558449	878454	1.49666e+06
M395T161	395.316	161.173	1-hydroxy vitamin d2		C08211	Lipids and lipid-like molecules	Steroids and steroid derivatives	Vitamin D and derivatives	26074	32158	83142.1	71445.6	175062	103410	46138.1	41412.2	187416	93034.9	89892.5	25092.1
M187T225_2	187.042	225.093	1-hydroxy-2-naphthoic acid		C03203	Benzenoids	Naphthalenes	Naphthalenecarboxylic acids and derivatives	8.83966e+07	4.6138e+07	165158714	2.30178e+07	5.00551e+07	2.87725e+07	2.66428e+07	2.75214e+07	105019519	2.17851e+07	125597237	2.66375e+07
M223T32	223.028	31.8131	1-hydroxyanthraquinone		C02980	Benzenoids	Anthracenes	Anthraquinones	1.35388e+06	1.85283e+06	6.44303e+06	6.22917e+06	1.05923e+06	1.44839e+06	1.04359e+06	3.03957e+06	1.97281e+06	816407	4.79725e+06	7.04237e+06
M440T189	440.277	189.28	1-lauroyl-2-hydroxy-sn-glycero-3-phosphocholine			Lipids and lipid-like molecules	Glycerophospholipids	Glycerophosphocholines	18760.1	85140.2	131450	5.56178e+06	2.25991e+06	5.18588e+06	2.76247e+06	2.37252e+06	2.21694e+06	3.0284e+06	2.53127e+06	3.35914e+06
M602T188	601.519	187.541	1-linoleoyl-2-oleoyl-rac-glycerol			Lipids and lipid-like molecules	Fatty Acyls	Lineolic acids and derivatives	1.94733e+07	2.05666e+07	1.98191e+07	1.78104e+07	1.66872e+07	18053059	1.71401e+07	1.66956e+07	1.70371e+07	2.01547e+07	2.0717e+07	1.95719e+07
M124T458	124.087	457.822	1-methyl-l-histidine	HMDB0000001	C01152	Organic acids and derivatives	Carboxylic acids and derivatives	Amino acids, peptides, and analogues	8.08492e+06	7.98066e+06	8.06522e+06	6.24923e+06	8.26561e+06	8.03393e+06	7.96948e+06	8.18842e+06	8.82791e+06	7.6493e+06	1.02667e+07	7.80659e+06
M181T273	181.048	272.718	1-methyluric acid	HMDB0003099	C16359	Organoheterocyclic compounds	Imidazopyrimidines	Purines and purine derivatives	3.72923e+06	3.6747e+06	3.51478e+06	3.21569e+06	2.78539e+06	3.43003e+06	2.81537e+06	2.54994e+06	2.80893e+06	2.9594e+06	3.01289e+06	3.2632e+06
M110T167	110.035	166.744	1-methylxanthine	HMDB0010738	C16358	Organoheterocyclic compounds	Imidazopyrimidines	Purines and purine derivatives	3.04105e+06	2.45297e+06	2.37013e+06	2.33217e+06	2.69844e+06	2.86053e+06	2.91308e+06	2.75578e+06	2.62005e+06	2.521e+06	2.33143e+06	2.85455e+06
M424T195	424.247	195.313	1-myristoyl-2-hydroxy-sn-glycero-3-phosphoethanolamine	HMDB0011500		Lipids and lipid-like molecules	Glycerophospholipids	Glycerophosphoethanolamines	73123	117607	50344.4	539418	558182	565001	592033	654057	514727	480039	430969	610820
M707T143	706.538	143.174	1-myristoyl-2-palmitoyl-sn-glycero-3-phosphocholine	HMDB0007869		Lipids and lipid-like molecules	Glycerophospholipids	Glycerophosphocholines	795345925	807905600	1117882796	421659883	443907852	334330656	345838908	339211143	337675442	405153527	446837920	542451563
M468T189	468.309	188.957	1-myristoyl-sn-glycero-3-phosphocholine	HMDB0010379		Lipids and lipid-like molecules	Glycerophospholipids	Glycerophosphocholines	2.8488e+07	3.91416e+07	2.19487e+07	6.4029e+07	5.26054e+07	6.15809e+07	5.80498e+07	5.70641e+07	5.13885e+07	7.04256e+07	5.35541e+07	7.62217e+07
M403T31_2	403.264	30.9454	1-o-(9z-octadecenyl)-sn-glycero-2,3-cyclic-phosphate						1.11468e+06	2.24598e+06	1.73189e+06	2.47421e+06	1.06219e+06	2.3071e+06	1.499e+06	1.46935e+06	1.72007e+06	2.15163e+06	1.63646e+06	1.54803e+06
M599T236	599.321	236.131	1-octadecanoyl-sn-glycero-3-phospho-(1'-myo-inositol)			Lipids and lipid-like molecules	Glycerophospholipids	Glycerophosphoinositols	2.81802e+06	3.98638e+06	2.64863e+06	4.94902e+06	3.28231e+06	4.02863e+06	3.34627e+06	3.01452e+06	3.78669e+06	4.91184e+06	4.30745e+06	4.02562e+06
M550T180_2	550.387	180.201	1-o-hexadecyl-2-o-(2e-butenoyl)-sn-glyceryl-3-phosphocholine			Lipids and lipid-like molecules	Glycerophospholipids	Glycerophosphocholines	2.92516e+06	3.96627e+06	2.66407e+06	5.90273e+06	3.07148e+06	5.85609e+06	2.59943e+06	2.76628e+06	2.29671e+06	2.75398e+06	3.71481e+06	2.92868e+06
M793T37	792.59	36.9648	1-o-hexadecyl-2-o-(4z,7z,10z,13z,16z,19z-docosahexaenoyl)-sn-glyceryl-3-phosphorylcholine	HMDB0013409		Lipids and lipid-like molecules	Glycerophospholipids	Glycerophosphocholines	103043315	117861922	117718032	6.74039e+07	6.69112e+07	8.5158e+07	8.60575e+07	7.64195e+07	8.40403e+07	82949629	8.21319e+07	8.87011e+07
M767T133	766.575	133.249	1-o-hexadecyl-2-o-(5z,8z,11z,14z,17z-eicosapentaenoyl)-sn-glyceryl-3-phosphorylcholine			Lipids and lipid-like molecules	Glycerophospholipids	Glycerophosphocholines	132475824	136072465	148080705	102260767	102418769	107260656	124093539	105271571	104105797	114688281	124584761	116427672
M509T36	509.289	35.9672	1-oleoyl-2-hydroxy-sn-glycero-3-phospho-(1'-rac-glycerol)			Lipids and lipid-like molecules	Glycerophospholipids	Glycerophosphoglycerols	2.70131e+07	3.00926e+07	2.73933e+07	3.47533e+07	2.85485e+07	2.37669e+07	3.25998e+07	38749345	2.69378e+07	2.54779e+07	2.91772e+07	3.57058e+07
M733T141_1	732.554	141.167	1-oleoyl-2-myristoyl-sn-glycero-3-phosphocholine	HMDB0008097		Lipids and lipid-like molecules	Glycerophospholipids	Glycerophosphocholines	2742448461	2793642392	2780635809	2766389731	2499639139	2736560331	2636938656	2649741234	2761505101	2896738913	2964308224	2748773914
M522T183_2	522.356	182.908	1-oleoyl-sn-glycero-3-phosphocholine	HMDB0002815		Lipids and lipid-like molecules	Glycerophospholipids	Glycerophosphocholines	63376667	93858807	6.39051e+07	102418374	2.9164e+07	106771237	4.04076e+07	5.52597e+07	2.20086e+07	8.02826e+07	6.62796e+07	6.86666e+07
M480T189	480.309	188.867	1-oleoyl-sn-glycero-3-phosphoethanolamine	HMDB0011506		Lipids and lipid-like molecules	Glycerophospholipids	Glycerophosphoethanolamines	5.5564e+06	7.43093e+06	4.38755e+06	1.17054e+07	1.20075e+07	1.22668e+07	1.34308e+07	1.41426e+07	1.37584e+07	1.26612e+07	8.35439e+06	1.34428e+07
M782T190	782.497	190.461	1-palmitoyl-2-arachidonoyl-sn-glycero-3-phosphoserine	HMDB0012361		Lipids and lipid-like molecules	Glycerophospholipids	Glycerophosphoserines	3.98325e+06	4.31402e+06	4.11697e+06	4.04173e+06	1.58195e+06	3.67802e+06	1.26237e+06	1.86508e+06	2.94607e+06	4.09269e+06	4.42934e+06	1.70991e+06
M666T226	666.435	226.45	1-palmitoyl-2-azelaoylphosphatidylcholine			Lipids and lipid-like molecules	Glycerophospholipids	Glycerophosphocholines	10589.1	21071.6	9710.54	18916.7	15140	17176.1	14370.5	13860.2	9200.28	8896.23	24742.6	18279.5
M483T36	483.273	35.8859	1-palmitoyl-2-hydroxy-sn-glycero-3-phospho-(1'-rac-glycerol)			Lipids and lipid-like molecules	Glycerophospholipids	Glycerophosphoglycerols	9.9584e+06	1.29872e+07	8.40012e+06	1.77598e+07	1.39467e+07	12998299	1.85233e+07	2.1755e+07	1.29472e+07	1.30723e+07	1.39477e+07	2.01982e+07
M454T192_1	454.293	191.582	1-palmitoyl-2-hydroxy-sn-glycero-3-phosphoethanolamine	HMDB0011503		Lipids and lipid-like molecules	Glycerophospholipids	Glycerophosphoethanolamines	3.72162e+06	4.4241e+06	2.80411e+06	1.30709e+07	11477015	1.39717e+07	1.12257e+07	1.06315e+07	1.22336e+07	1.25219e+07	1.00911e+07	1.36026e+07
M679T169_1	678.507	169.261	1-palmitoyl-2-lauroyl-sn-glycero-3-phosphorylcholine			Lipids and lipid-like molecules	Glycerophospholipids	Glycerophosphocholines	11903995	1.04885e+07	1.59736e+07	3.04737e+07	1.88005e+07	2.24347e+07	2.73352e+07	3.29295e+07	32524389	3.67756e+07	3.53683e+07	2.52217e+07
M313T84	313.274	84.4399	1-palmitoyl-2-linoleoyl-rac-glycerol			Lipids and lipid-like molecules	Fatty Acyls	Lineolic acids and derivatives	4.98309e+06	4.21953e+06	4.7816e+06	4.61878e+06	2.20452e+06	3.81679e+06	2.85531e+06	4.56727e+06	3.9262e+06	5.04787e+06	4.77623e+06	5.10721e+06
M759T38_1	758.569	37.549	1-palmitoyl-2-linoleoyl-sn-glycero-3-phosphocholine	HMDB0007973		Lipids and lipid-like molecules	Glycerophospholipids	Glycerophosphocholines	920164364	946883554	938572944	791054551	723749150	805523864	919527338	789865898	800038232	803996271	851841274	901239248
M602T626_1	601.52	625.821	1-palmitoyl-2-oleoyl-3-linoleoyl-rac-glycerol			Lipids and lipid-like molecules	Glycerolipids	Triradylcglycerols	7.41663e+06	6.82422e+06	1.03164e+07	9.23538e+06	5.98502e+06	7.42119e+06	7.07898e+06	4.81002e+06	5.16206e+06	8.70015e+06	1.17959e+07	4.99531e+06
M673T154	673.479	153.739	1-Palmitoyl-2-oleoyl-sn-glycero-3-phosphate						1.15861e+06	1.01883e+06	1.04172e+06	946675	747076	392142	555217	892897	758349	1.10187e+06	1.11543e+06	972064
M741T142	740.521	141.854	1-palmitoyl-2-oleoyl-sn-glycero-3-phosphoethanolamine	HMDB0008927		Lipids and lipid-like molecules	Glycerophospholipids	Glycerophosphoethanolamines	5.30786e+07	7.86934e+07	7.15858e+07	8.52128e+07	7.11899e+07	9.64712e+07	107668166	103235142	8.43212e+07	8.33873e+07	104099997	9.7096e+07
M578T35	577.519	35.3532	1-palmitoyl-2-oleoyl-sn-glycerol	HMDB0007102		Lipids and lipid-like molecules	Glycerolipids	Diradylglycerols	64813974	6.95524e+07	8.11455e+07	7.04193e+07	6.47812e+07	112845317	129464526	6.98418e+07	103245947	8.0502e+07	8.33507e+07	8.34008e+07
M717T38	716.524	38.018	1-palmitoyl-3-oleoyl-sn-glycero-2-phosphoethanolamine			Lipids and lipid-like molecules	Glycerophospholipids	Glycerophosphates	2.66189e+07	2.7683e+07	2.70599e+07	2.75415e+07	2.98217e+07	2.75401e+07	2.68793e+07	2.81021e+07	2.7949e+07	2.79949e+07	2.90573e+07	2.6788e+07
M313T34	313.274	34.2739	1-palmitoylglycerol			Lipids and lipid-like molecules	Glycerolipids	Monoradylglycerols	65319628	7.34508e+07	124838461	139808939	123222837	8.1206e+07	127643801	122927272	119177014	141394911	139377088	131931790
M184T455	184.073	455.373	1-palmitoyl-sn-glycero-3-phosphocholine	HMDB0010382		Lipids and lipid-like molecules	Glycerophospholipids	Glycerophosphocholines	2370708449	2601785295	2488154289	1934366531	2787150987	2362943309	3028250459	3519256411	3385394021	2725078903	2872568424	3533553979
M482T157	482.325	157.19	1-pentadecanoyl-sn-glycero-3-phosphocholine	HMDB0010381		Lipids and lipid-like molecules	Glycerophospholipids	Glycerophosphocholines	2.1408e+06	4.84578e+06	3.68212e+06	14730039	1.07848e+07	1.29494e+07	1.31247e+07	1.56985e+07	1.67619e+07	7.76395e+06	4.29739e+06	1.30137e+07
M400T443	400.04	442.636	1-pyrrolidinecarboxamide, n-[3-[[5-bromo-4-[[2-(1h-imidazol-5-yl)ethyl]amino]-2-pyrimidinyl]amino]phenyl]-			Benzenoids	Benzene and substituted derivatives	N-phenylureas	894648	915019	883402	926872	701162	913629	829467	738687	635754	943440	888768	808133
M888T161	887.57	160.993	1-stearoyl-2-arachidonoyl-sn-glycero-3-phospho-(1'-myo-inositol)	HMDB0009815		Lipids and lipid-like molecules	Glycerophospholipids	Glycerophosphoinositols	445376	650913	382359	400450	227602	284445	400272	501887	295670	461051	468614	581002
M822T190	821.517	190.472	1-stearoyl-2-docosahexaenoyl-sn-glycero-3-phospho-(1'-sn-glycerol)			Lipids and lipid-like molecules	Glycerophospholipids	Glycerophosphoglycerols	3.06983e+06	3.03203e+06	3.00081e+06	2.53716e+06	2.38643e+06	2.19266e+06	2.01019e+06	2.86295e+06	3.2792e+06	2.74304e+06	2.65987e+06	2.55521e+06
M835T134	834.599	133.884	1-stearoyl-2-docosahexaenoyl-sn-glycero-3-phosphocholine	HMDB0008057		Lipids and lipid-like molecules	Glycerophospholipids	Glycerophosphocholines	8.10089e+07	80549823	8.99743e+07	7.93774e+07	7.94866e+07	8.04704e+07	7.91282e+07	79661874	8.22756e+07	8.02412e+07	7.9721e+07	76630750
M652T29	651.535	29.0023	1-stearoyl-2-docosahexaenoyl-sn-glycerol	HMDB0007179		Lipids and lipid-like molecules	Glycerolipids	Diradylglycerols	3.55196e+06	3.84189e+06	3.68097e+06	3.1595e+06	2.29815e+06	2.89772e+06	2.93987e+06	2.69061e+06	2.5417e+06	3.25408e+06	3.28488e+06	3.17382e+06
M437T25	437.258	25.4372	1-stearoyl-2-hydroxy-sn-glycero-3-phosphate			Lipids and lipid-like molecules	Glycerophospholipids	Glycerophosphates	39111.2	200917	50763.2	107651	66017	53113.2	66471.7	417943	112784	81517.8	63601.7	55719.5
M546T182	546.355	181.815	1-stearoyl-2-hydroxy-sn-glycero-3-phosphocholine	HMDB0010384	C04230	Lipids and lipid-like molecules	Glycerophospholipids	Glycerophosphocholines	1.72287e+06	2.22678e+06	1.76712e+06	4.81211e+06	1.54863e+06	2.5973e+06	451415	542882	297701	886267	2.62914e+06	925637
M504T188_1	504.307	188.218	1-stearoyl-2-hydroxy-sn-glycero-3-phosphoethanolamine	HMDB0011130		Lipids and lipid-like molecules	Glycerophospholipids	Glycerophosphoethanolamines	1.06223e+06	1.13264e+06	552962	2.36595e+06	2.66749e+06	2.33051e+06	2.70094e+06	3.12625e+06	3.16198e+06	2.54236e+06	1.39698e+06	2.63152e+06
M774T114	773.545	114.099	1-stearoyl-2-linoleoyl-sn-glycero-3-phospho-(1'-rac-glycerol)			Lipids and lipid-like molecules	Glycerophospholipids	Glycerophosphoglycerols	7.96319e+06	1.06357e+07	7.57547e+06	5.72422e+06	1.17825e+07	2.52474e+07	1.74594e+07	1.43557e+07	1.87258e+07	1.527e+07	1.77917e+07	1.67671e+07
M787T422	786.602	422.137	1-stearoyl-2-linoleoyl-sn-glycero-3-phosphocholine	HMDB0008039		Lipids and lipid-like molecules	Glycerophospholipids	Glycerophosphocholines	1.29063e+06	639673	1.07369e+06	1.58339e+06	934018	686199	899074	440393	431090	622223	1.28904e+06	976012
M743T86	742.54	85.7117	1-stearoyl-2-linoleoyl-sn-glycero-3-phosphoethanolamine	HMDB0008994		Lipids and lipid-like molecules	Glycerophospholipids	Glycerophosphoethanolamines	7.06289e+06	7.50822e+06	6.27545e+06	1.60832e+07	9.27084e+06	8.73751e+06	7.39529e+06	945804	7.16274e+06	7.41431e+06	1.00667e+07	1.11314e+07
M833T37	832.585	36.9455	1-Stearoyl-2-oleoyl-sn-glycerol 3-phosphocholine (SOPC)	HMDB0000564/HMDB0007878/HMDB0007879/HMDB0007880/HMDB0007882/HMDB0007884/HMDB0007886/HMDB0007887/HMDB0007897/HMDB0007898/HMDB0007911/HMDB0007912/HMDB0007913/HMDB0007914/HMDB0007936/HMDB0007937/HMDB0007938/HMDB0007939/HMDB0007940/HMDB0007958/HMDB0007959/HMDB0007960/HMDB0007961/HMDB0007964/HMDB0007966/HMDB0007967/HMDB0007981/HMDB0007982/HMDB0007983/HMDB0007984/HMDB0007985/HMDB0008002/HMDB0008003/HMD…	C00157	Lipids and lipid-like molecules	Glycerophospholipids	Glycerophosphocholines	6.49314e+07	7.92784e+07	79856510	4.48894e+07	4.96429e+07	6.55677e+07	6.43661e+07	5.75598e+07	6.56399e+07	5.85226e+07	5.4891e+07	5.85994e+07
M341T236	341.305	236.148	1-Stearoyl-rac-glycerol						1.03527e+06	1.58799e+06	1.04512e+06	1.59819e+06	1.28823e+06	1.35773e+06	1.19767e+06	1.37952e+06	1.72893e+06	1.88741e+06	1.40462e+06	1.54259e+06
M524T129	524.371	129.193	1-Stearoyl-sn-glycerol 3-phosphocholine(LPC(18:0))	HMDB0010384	C04230	Lipids and lipid-like molecules	Glycerophospholipids	Glycerophosphocholines	2.31146e+06	3.76328e+06	3.42039e+06	3.6499e+06	4.67201e+06	4.33226e+06	6.86264e+06	6.99847e+06	3.27218e+06	3.52005e+06	4.07084e+06	6.05662e+06
M96T422	96.0445	422.252	2(1h)-pyridinone	HMDB0013751	C02502	Organoheterocyclic compounds	Pyridines and derivatives	Hydropyridines	6.6881e+06	8.1374e+06	7.71605e+06	4676265	5.51447e+06	5.29433e+06	5.64867e+06	6.26558e+06	6.16219e+06	5.82141e+06	6.48885e+06	6.58978e+06
M217T63	217.105	63.129	2-(2',3',4'-trihydroxybutyl)quinoxaline			Organoheterocyclic compounds	Diazanaphthalenes	Benzodiazines	3.91952e+06	6.4876e+06	1.18428e+07	6297229	2.78515e+06	5.38443e+06	6.51982e+06	7.16991e+06	5.80871e+06	5.3128e+06	6.60327e+06	8.3126e+06
M277T225	277.024	225.223	2-(4-chlorophenyl)-1-(2,4,6-trihydroxyphenyl)ethanone						1.65795e+07	9.68987e+06	2.41609e+07	6.40449e+06	9.86771e+06	6.81617e+06	6.07012e+06	5.67776e+06	1.44982e+07	5.10343e+06	2.12989e+07	6.07952e+06
M221T372	221.018	372.194	2-(4-pyridyl)-4-methylthiazole-5-carboxylic acid			Organoheterocyclic compounds	Azoles	Thiazoles	8.93396e+06	13897994	4.08691e+06	1.70197e+07	1.63441e+07	1.61783e+07	2.59513e+07	26505587	1.36742e+07	2.42337e+07	6.12319e+06	2.88841e+07
M594T163	594.377	162.825	2-(5-oxovaleryl)phosphatidylcholine			Lipids and lipid-like molecules	Glycerophospholipids	Glycerophosphocholines	200465	85239.5	163415	299821	452549	381063	276305	587458	862964	435461	606152	501492
M210T166	210.134	165.511	2,2-bis[hydroxymethyl]-2,2',2''-nitrilotriethanol			Organic nitrogen compounds	Organonitrogen compounds	Amines	552951	1.62543e+06	1.28356e+06	3.08111e+06	973995	2.36956e+06	1.39127e+06	1.87711e+06	1.85804e+06	1.15877e+07	1.27658e+06	1.86714e+06
M349T83	349.183	83.3846	2,3-dinor-8-isoprostaglandin-f2.alpha.		C14794	Lipids and lipid-like molecules	Fatty Acyls	Eicosanoids	1.08804e+06	1.10746e+06	1.52505e+06	2.33198e+06	225304	974044	716272	862592	436382	1.62299e+06	643039	1.48216e+06
M195T425	194.906	425.271	2,4,6-trichlorophenol		C07098	Benzenoids	Phenols	Halophenols	3.96946e+07	9.72298e+06	2.56251e+07	1.39305e+07	1.21602e+07	1.71853e+07	6.94834e+07	4.50584e+07	14523171	2.33574e+07	3.25755e+07	1.53405e+07
M246T68	246.243	67.9868	2,4,6-tri-tert-butylaniline			Benzenoids	Benzene and substituted derivatives	Phenylpropanes	8.29819e+07	8.79854e+07	6.75246e+07	134877646	64778087	9.18398e+07	125725386	7.83224e+07	150455902	127631705	8.77943e+07	7.41703e+07
M108T153	108.056	152.526	2,4-diaminotoluene	HMDB0041799	C14401	Benzenoids	Benzene and substituted derivatives	Toluenes	2.64008e+06	1.28641e+06	2.22638e+06	1.77773e+06	1.55771e+06	1.54009e+06	2.34033e+06	2.79408e+06	3062721	2.42766e+06	1.97282e+06	1.66892e+06
M111T508	111.02	507.853	2,5-furandicarboxylic acid	HMDB0004812	C20450	Organoheterocyclic compounds	Furans	Furoic acid and derivatives	1.29257e+07	1.41586e+07	2.32282e+07	8.48089e+06	1.48808e+07	8.68699e+06	1.67575e+07	1.7129e+07	1.92532e+07	1.20512e+07	1.40728e+07	1.30726e+07
M231T269	231.084	269.086	2-[(2-aminobenzoyl)amino]propanoic acid			Benzenoids	Benzene and substituted derivatives	Benzoic acids and derivatives	455525	582677	1.13188e+06	506438	412262	577691	566525	492756	597754	455303	445692	578298
M589T147	589.315	147.442	2-[3-[(e)-6-acetyloxy-2-hydroxy-6-methyl-3-oxohept-4-en-2-yl]-6-(carboxymethyl)-2-hydroxy-3a,5a,9b-trimethyl-5-oxo-2,3,4,6,9,9a-hexahydro-1h-cyclopenta[a]naphthalen-7-yl]-2-methylpropanoic acid			Lipids and lipid-like molecules	Prenol lipids	Triterpenoids	2.30876e+06	2.6836e+06	2.37727e+06	2.86364e+06	3.75706e+06	3.54058e+06	2.17056e+06	2.0639e+06	2.3345e+06	2.21896e+06	2.55841e+06	2.30746e+06
M329T166	329.234	165.579	21-hydroxyprogesterone	HMDB0000016	C03205	Lipids and lipid-like molecules	Steroids and steroid derivatives	Hydroxysteroids	1.15797e+06	916431	801268	516056	352144	618921	567045	259401	1.15527e+06	528437	1.21565e+06	687001
M660T188	659.597	187.613	2-alahaa [dmed-fahfa]						3.4561e+06	4.30108e+06	3.96849e+06	2.97911e+06	2.30066e+06	2.38212e+06	2.53822e+06	2.17148e+06	2.05729e+06	3.52494e+06	3.40478e+06	3.22608e+06
M618T144	617.55	144.46	2-alahhda [dmed-fahfa]						4.00868e+06	3.46897e+06	3.54669e+06	4.04045e+06	3.75269e+06	3.22729e+06	4.33842e+06	4.85727e+06	4.21707e+06	4.4474e+06	4.63696e+06	4.66088e+06
M133T32	133.102	32.389	2-amino-1-phenylbutane			Benzenoids	Benzene and substituted derivatives	Phenethylamines	2.19489e+07	2.24206e+07	2.62976e+07	2.08297e+07	2.10639e+07	2.46302e+07	6.667e+07	1.60159e+07	1.72255e+07	1.91726e+07	17846157	1.82212e+07
M120T282_1	120.102	281.671	2-amino-1-phenylethanol	HMDB0001065	C02735	Organic nitrogen compounds	Organonitrogen compounds	Amines	297869248	355161921	329453184	402138751	305104782	399913059	421302569	402581725	408391954	426817783	467353544	504426971
M88T35	88.0758	35.3509	2-amino-2-methyl-1,3-propanediol		C11260	Organic nitrogen compounds	Organonitrogen compounds	Amines	8.98797e+06	6.17832e+06	1.62327e+07	1.1483e+07	4.27436e+06	7.11661e+06	9.56144e+06	1.25779e+07	8070331	9.14353e+06	9.24269e+06	9.34128e+06
M90T581	90.0915	580.795	2-amino-2-methyl-1-propanol			Organic nitrogen compounds	Organonitrogen compounds	Amines	2.83769e+07	1.91945e+07	2.55092e+07	1.14849e+07	1.00986e+07	1.36139e+07	1.71481e+07	22192214	1.88262e+07	2.32651e+07	3.28348e+07	24351614
M134T46	134.063	46.2148	2-aminobenzimidazole		C10901				3.12866e+06	2.00969e+06	1.79914e+06	2.76586e+06	1.05784e+06	2.35498e+06	2.18132e+06	2057367	2.45127e+06	1.62255e+06	1.29467e+06	3.08407e+06
M767T38	766.54	37.8368	2-arachidonoyl-1-stearoyl-sn-glycero-3-phosphoethanolamine	HMDB0009003		Lipids and lipid-like molecules	Glycerophospholipids	Glycerophosphoethanolamines	21261224	2.30598e+07	2.04281e+07	2.27257e+07	2.31806e+07	2.24307e+07	2.26042e+07	2.08133e+07	2.08318e+07	2.50097e+07	23928254	22789433
M361T136	361.274	136.409	2-arachidonoylglycerol	HMDB0004666	C13856				24087573	2.43747e+07	2.37869e+07	2.51671e+07	2.41042e+07	2.43551e+07	2.51088e+07	2.34525e+07	2.273e+07	31977166	2.49966e+07	2.34381e+07
M245T338	245.043	338.365	2'-chloro-2-hydroxy-5-methylbenzophenone			Benzenoids	Benzene and substituted derivatives	Benzophenones	3.97998e+06	5.03172e+06	2.6063e+06	6.0091e+06	6.42093e+06	6.4449e+06	7.65568e+06	8.9764e+06	4.89638e+06	6.03425e+06	3.2693e+06	8.70154e+06
M263T180	263.14	180.422	2-cis-4-trans-abscisic acid		C06082	Lipids and lipid-like molecules	Prenol lipids	Sesquiterpenoids	2.04745e+06	3.07625e+06	3.38389e+06	1.06239e+06	696281	1.23048e+06	1.64204e+06	2.18466e+06	2.30898e+06	643201	1.055e+06	2.26029e+06
M506T479	505.989	478.833	2'-deoxyguanosine 5'-triphosphate	HMDB0001440	C00286	Nucleosides, nucleotides, and analogues	Purine nucleotides	Purine deoxyribonucleotides	185148	196330	428757	350489	341538	407876	288947	635686	681310	295924	421459	133021
M213T32	213.015	32.2364	2-deoxyribose 5-phosphate	HMDB0001031	C00673	Organic oxygen compounds	Organooxygen compounds	Carbohydrates and carbohydrate conjugates	1.64392e+06	1.50775e+06	1.52474e+06	1.50654e+06	2.56512e+06	1.79499e+06	2.4317e+06	1.90016e+06	34439.7	1.69021e+06	1.24294e+06	2.14842e+06
M307T225_2	307.035	225.09	2'-deoxyuridine 5'-monophosphate	HMDB0001409	C00365	Nucleosides, nucleotides, and analogues	Pyrimidine nucleotides	Pyrimidine deoxyribonucleotides	4.55619e+06	1.87161e+06	9.56611e+06	798212	2.16597e+06	1.06545e+06	731645	752408	4.47807e+06	567894	6.94953e+06	827283
M654T185	653.55	184.543	2-dhahpa [dmed-fahfa]						19459341	2.07373e+07	2.0719e+07	1.55173e+07	1.48265e+07	1.52972e+07	1.56309e+07	1.30009e+07	1.26777e+07	1.96354e+07	1.96793e+07	1.91135e+07
M793T123	792.552	123.203	2-docosahexaenoyl-1-stearoyl-sn-glycero-3-phosphoethanolamine	HMDB0009012		Lipids and lipid-like molecules	Glycerophospholipids	Glycerophosphoethanolamines	1.62378e+07	112295082	1.53016e+07	8.81757e+07	8.60736e+07	9.32016e+07	8.46063e+07	8.6446e+07	8.0401e+07	8.41821e+07	2.72665e+07	8.12054e+07
M606T147	605.55	146.504	2-edahma [dmed-fahfa]						132252864	123905863	121951800	151153809	140282737	126704270	154478135	134326105	131785324	164988084	178131496	143213604
M634T149_1	633.58	149.279	2-edahpa [dmed-fahfa]						4.72739e+06	4.57074e+06	4.31589e+06	4.3172e+06	2.33324e+06	2.52785e+06	2.21807e+06	2.94802e+06	3.68127e+06	5.03323e+06	5.36004e+06	2.70992e+06
M632T145	631.566	144.507	2-erahpa [dmed-fahfa]						1.74829e+07	1.69427e+07	1.80282e+07	1.77465e+07	1.69431e+07	1.83708e+07	1.9146e+07	1.78115e+07	1.858e+07	2.23064e+07	1.93042e+07	1.95871e+07
M351T649	351.155	649.008	2-furancarboxylic acid, 5-[3-[4-[2-(4-fluorophenyl)ethoxy]phenyl]propyl]-			Organoheterocyclic compounds	Furans	Furoic acid and derivatives	2.1933e+06	2.08545e+06	942270	2.95339e+06	871162	1.16341e+06	2.47097e+06	2.18325e+06	1.3751e+06	2.44005e+06	2.11642e+06	2.39739e+06
M111T525	111.009	524.502	2-Furoic acid	HMDB0000617	C01546	Organoheterocyclic compounds	Furans	Furoic acid and derivatives	19036951	1.99116e+07	3.82731e+07	2.23225e+07	4.69528e+07	3.28607e+07	2.9825e+07	1.81923e+07	3.31886e+07	1.81915e+07	3.9333e+07	2.21492e+07
M552T162	552.27	162.458	2h-benzimidazol-2-one, 1,3-dihydro-1-[1-[[4-(6-phenyl-1h-imidazo[4,5-g]quinoxalin-7-yl)phenyl]methyl]-4-piperidinyl]-			Organoheterocyclic compounds	Piperidines	Benzylpiperidines	694686	430202	730754	1.57057e+06	1.54343e+06	1.20356e+06	966023	1.07763e+06	2.00434e+06	930073	1.79849e+06	979858
M258T281	258.146	280.854	2-heptyl-4-hydroxyquinoline n-oxide		C04284	Organoheterocyclic compounds	Quinolines and derivatives	4-hydroxy-2-alkylquinolines	501905	1.20579e+06	1.21785e+06	535482	616616	553242	1.17062e+06	2.02546e+06	1.44685e+06	824916	423540	1.1553e+06
M150T110	150.056	109.609	2'-hydroxy-4'-methoxyacetophenone		C10712	Organic oxygen compounds	Organooxygen compounds	Carbonyl compounds	415389	476747	349900	327312	829847	333415	1051736	1.06735e+06	840594	454358	308468	1.04556e+06
M165T305	165.053	304.818	2'-hydroxy-6'-methoxyacetophenone			Organic oxygen compounds	Organooxygen compounds	Carbonyl compounds	1.4247e+06	1.26971e+06	1.28093e+06	729918	1.16106e+06	821612	980950	999049	902034	1.34819e+06	1.16998e+06	1.19803e+06
M131T372	131.046	372.18	2-hydroxyisocaproic acid	HMDB0000624	C03264	Lipids and lipid-like molecules	Fatty Acyls	Fatty acids and conjugates	1.85605e+06	3.01459e+06	1.90411e+06	2.04649e+06	2.36243e+06	2.43984e+06	4.14727e+06	4.44906e+06	2.37145e+06	2.82629e+06	1.76905e+06	3.35717e+06
M210T712	210.088	711.775	2-isopropoxyphenyl n-methylcarbamate		C14334				6.47361e+06	5.08196e+06	42067.1	5.72207e+06	2.20549e+06	5.87897e+06	6.41012e+06	5.12693e+06	3.67724e+06	6.11725e+06	7.42547e+06	4.12224e+06
M592T146	591.535	145.827	2-lahpda [dmed-fahfa]						17357472	1.66662e+07	1.59051e+07	18537271	14550198	1.37954e+07	1.64481e+07	1.57754e+07	1.50512e+07	18440112	1.99133e+07	19054616
M576T144	575.504	144.463	2-linoleoyl-1-palmitoyl-sn-glycero-3-phosphoethanolamine	HMDB0008928		Lipids and lipid-like molecules	Glycerophospholipids	Glycerophosphoethanolamines	112293020	8.88008e+07	8.3632e+07	103247554	90598162	112535570	152564113	100624801	103299039	9.91532e+07	108863111	103310027
M523T89	523.472	88.7338	2-mohma [dmed-fahfa]						1.18829e+07	1.11355e+07	1.1022e+07	1.47841e+07	1.10444e+07	1.03878e+07	1.43058e+07	13476140	1.25105e+07	1.4522e+07	1.41678e+07	1.41566e+07
M761T139_2	760.585	139.186	2-oleoyl-1-palmitoyl-sn-glycero-3-phosphocholine	HMDB0007972		Lipids and lipid-like molecules	Glycerophospholipids	Glycerophosphocholines	4746459729	6824659911	4836934142	4041897717	3352440884	3670119583	3496543085	3575446711	3794970496	4558371704	5558056566	4561360892
M785T187_1	784.511	187.133	2-oleoyl-1-palmitoyl-sn-glycero-3-phosphoserine	HMDB0012357		Lipids and lipid-like molecules	Glycerophospholipids	Glycerophosphoserines	12611425	1.34985e+07	1.34274e+07	1.12991e+07	6.40037e+06	6.17154e+06	6.80234e+06	8.92387e+06	9.3156e+06	1.23927e+07	6.90716e+06	6.24725e+06
M789T187	788.545	186.933	2-oleoyl-1-stearoyl-sn-glycero-3-phosphoserine	HMDB0010163		Lipids and lipid-like molecules	Glycerophospholipids	Glycerophosphoserines	3.4512e+07	4.15288e+07	3.8248e+07	28271567	2.35876e+07	2.44061e+07	2.64748e+07	2.32551e+07	25286190	3.61898e+07	3.52079e+07	3.46645e+07
M181T413	181.01	412.625	2-Oxoadipic acid	HMDB0000225	C00322	Organic acids and derivatives	Keto acids and derivatives	Medium-chain keto acids and derivatives	1.6255e+06	964182	2.52262e+06	1.27333e+06	872725	864758	995576	1.07758e+06	1.15135e+06	932028	1.03415e+06	926845
M313T189	313.274	189.118	2-palmitoyl-rac-glycerol	HMDB0011533		Lipids and lipid-like molecules	Glycerolipids	Monoradylglycerols	3.22521e+06	3.75852e+06	3.11752e+06	6.51772e+06	5.97096e+06	2.91755e+06	2.44878e+06	4.32338e+06	4.76498e+06	3.19978e+06	2.39799e+06	3.00794e+06
M185T449	184.986	448.926	2-phosphoglycerate	HMDB0000362	C00197	Organic oxygen compounds	Organooxygen compounds	Carbohydrates and carbohydrate conjugates	4.4936e+06	6.73444e+06	4.34591e+06	6.37881e+06	2.77232e+07	12894914	3.06613e+07	3.32177e+07	2.62019e+07	2.79558e+07	5.10394e+06	2.3349e+07
M261T68	261.126	68.4171	2-propenamide, n-(4,5-dihydro-2-thiazolyl)-3-(4-ethylphenyl)-, (2e)-						1.06259e+07	8.62444e+06	1.31886e+07	5.64061e+06	6.33141e+06	1.01992e+07	8.46323e+06	9.06458e+06	1.02642e+07	4.96476e+06	8.59803e+06	7.50844e+06
M240T164	240.232	163.952	2s-amino-4e-pentadecene-1,3r-diol			Organic nitrogen compounds	Organonitrogen compounds	Amines	2.25394e+06	1.85567e+06	1.18479e+06	2.34641e+06	1.39838e+06	1.85392e+06	2.87999e+06	1.50737e+06	1.64925e+06	1.78758e+06	2.33019e+06	1.60272e+06
M367T407_2	367.066	406.978	2s-amino-4-phosphonobutyric acid			Organic acids and derivatives	Carboxylic acids and derivatives	Amino acids, peptides, and analogues	4.89604e+06	5.31794e+06	5.19523e+06	4.30681e+06	4.41023e+06	4.50373e+06	5.37893e+06	5.39997e+06	5.31564e+06	5.1942e+06	5.49806e+06	5.30966e+06
M245T40	245.136	39.6602	3,3'-dimethoxybenzidine		C19231	Benzenoids	Benzene and substituted derivatives	Biphenyls and derivatives	6.42612e+06	6.95726e+06	5.83622e+06	8.59373e+06	4.78527e+06	8.85651e+06	11161214	1.02188e+07	9.19745e+06	1.1524e+07	8.2754e+06	10695622
M151T581	151.051	581.486	3,4-dihydroxyacetophenone	HMDB0029661	C10675	Organic oxygen compounds	Organooxygen compounds	Carbonyl compounds	514248	439916	349052	378683	483631	485977	548117	501046	446657	394617	496519	377353
M196T300	196.061	299.555	3,4-Dihydroxy-L-phenylalanine(L-DOPA)	HMDB0000181	C00355	Organic acids and derivatives	Carboxylic acids and derivatives	Amino acids, peptides, and analogues	794250	1.01701e+06	903773	556293	1.1861e+06	758019	1.62865e+06	1.8984e+06	2.332e+06	753689	926782	1.68415e+06
M149T30_1	149.023	30.211	3,4-dihydroxymandelic acid	HMDB0001866	C05580	Benzenoids	Phenols	Benzenediols	9.50811e+06	1.0065e+07	1.17778e+07	9.92505e+06	1.10844e+07	1.3623e+07	1.06582e+07	1.37208e+07	1.12889e+07	1.08654e+07	1.15566e+07	1.20063e+07
M135T33_1	135.081	33.0641	3,4-dimethylbenzaldehyde			Benzenoids	Benzene and substituted derivatives	Benzoyl derivatives	3.64795e+06	1.04432e+07	6.57961e+06	5.70408e+06	3.66371e+06	5.96495e+06	9.11706e+06	3.06371e+06	6.66044e+06	3.05223e+06	3.76256e+06	3.47544e+06
M184T528	184.073	527.967	3,5,9-trioxa-4-phosphatetracosan-1-aminium, 7-(acetyloxy)-24-carboxy-4-hydroxy-n,n,n-trimethyl-, inner salt, 4-oxide, (r)-			Lipids and lipid-like molecules	Glycerophospholipids	Glycerophosphocholines	1.62204e+07	2.39898e+07	2.65853e+07	4.25648e+07	5.70333e+07	3.09093e+07	2.00185e+07	4.04008e+07	29899214	5.43711e+07	2.47431e+07	5.58741e+07
M329T437	329.031	436.524	3',5'-cyclic inosine monophosphate			Nucleosides, nucleotides, and analogues	Purine nucleotides	Cyclic purine nucleotides	1.26313e+06	1.57157e+06	3.00411e+06	1.42502e+06	1.83932e+06	1.88762e+06	3.14773e+06	4.19615e+06	6.78804e+06	616238	2.93076e+06	513749
M205T30	205.16	30.4977	3,5-di-tert-butyl-4-hydroxybenzoic acid			Benzenoids	Benzene and substituted derivatives	Benzoic acids and derivatives	1.19307e+06	1.32991e+06	1.33396e+06	894329	1.20303e+06	975672	785011	1.00857e+06	928749	1.25394e+06	1.1521e+06	1.05411e+06
M707T390	707.222	389.755	3.alpha.-galactobiose			Organic oxygen compounds	Organooxygen compounds	Carbohydrates and carbohydrate conjugates	473950	2.26685e+06	2.39945e+06	1.79575e+06	3.96058e+06	4.1496e+06	5.13988e+06	8.75655e+06	9.81698e+06	3.08438e+06	4.0676e+06	3.49356e+06
M443T25	443.205	25.4035	3-[5-hydroxy-7-methoxy-2,3-dimethyl-6-(3-methylbut-2-enyl)-4-oxo-2,3-dihydrochromen-8-yl]hexanoic acid			Organoheterocyclic compounds	Benzopyrans	1-benzopyrans	197707	336009	144594	270602	64118.5	152095	492784	135107	108876	213145	204216	161424
M348T461	348.07	460.758	3'-AMP	HMDB0003540	C01367				705391	546631	752308	457962	848951	325895	531521	594512	1.09299e+06	654355	1.03424e+06	209495
M392T416	392.035	416.022	3'-azido-3'-deoxythymidine 5'-monophosphate			Organoheterocyclic compounds	Diazines	Pyrimidines and pyrimidine derivatives	4.02227e+06	2.48823e+06	4.97465e+06	1.05529e+06	4.278e+06	1.13177e+06	3.12549e+06	3.72599e+06	5.91807e+06	3.78851e+06	5.33982e+06	3.42092e+06
M169T457	168.964	457.353	3-bromobenzyl alcohol			Benzenoids	Benzene and substituted derivatives	Benzyl alcohols	3.9792e+06	4.34872e+06	4.31016e+06	4.62117e+06	3.17854e+06	4.98406e+06	3.43029e+06	2.69294e+06	2.4122e+06	4.59772e+06	4.67242e+06	4.41885e+06
M182T283_2	182.032	283.433	3-cysteinylacetaminophen	HMDB0240217		Organic acids and derivatives	Carboxylic acids and derivatives	Amino acids, peptides, and analogues	7.60638e+06	8.36869e+06	7.95554e+06	6.29383e+06	5.73265e+06	6.96558e+06	6.77904e+06	5.6115e+06	6.43038e+06	6.36564e+06	6.48352e+06	6.62043e+06
M535T213_2	535.155	212.729	3-deoxy-d-glycero-d-galacto-2-nonulosonic acid			Organic oxygen compounds	Organooxygen compounds	Carbohydrates and carbohydrate conjugates	581498	2.34701e+06	910030	754216	381614	996087	755862	720448	293248	529609	738334	1.27644e+06
M161T360	161.046	359.778	3-hydroxy-3-methylglutaric acid	HMDB0000355	C03761	Lipids and lipid-like molecules	Fatty Acyls	Fatty acids and conjugates	3.61945e+06	4.04108e+06	3.1098e+06	3.20838e+06	568627	3.75983e+06	533555	4.2238e+06	764050	3.83558e+06	4.15002e+06	4.47483e+06
M124T583	124.04	582.573	3-hydroxyacetaminophen			Benzenoids	Benzene and substituted derivatives	Anilides	1.3196e+07	7.22893e+06	7.09903e+06	4.24474e+06	7.35822e+06	6.22616e+06	8.79278e+06	7.56117e+06	6.83431e+06	4.95866e+06	6.61562e+06	8.29453e+06
M191T362	191.041	362.183	3-hydroxymandelic acid	HMDB0000750		Benzenoids	Phenols	1-hydroxy-4-unsubstituted benzenoids	3.67157e+06	4.64875e+06	3.15652e+06	3.31642e+06	3.93642e+06	4.24242e+06	4.25096e+06	5.76128e+06	4.67381e+06	4.2562e+06	2.5778e+06	4.29906e+06
M243T77	243.197	76.7855	3-hydroxymyristic acid	HMDB0061656		Lipids and lipid-like molecules	Fatty Acyls	Fatty acids and conjugates	542348	575810	573991	2.61098e+06	3.4691e+06	3.64172e+06	2.36801e+06	2.43236e+06	2.39795e+06	2.1969e+06	2.2375e+06	2.27142e+06
M151T239	151.061	239.287	3-hydroxyphenylacetic acid	HMDB0000440	C05593	Benzenoids	Phenols	1-hydroxy-4-unsubstituted benzenoids	661488	772505	1.70062e+06	436620	550048	515097	552702	320483	1.21011e+06	637356	1.28054e+06	915704
M376T442	376.044	442.241	3-hydroxypropyl-glucosinolate						594593	743601	651688	568491	547230	604352	677869	773083	507966	683278	664719	644573
M579T520	579.331	520.119	3-methylglutarylcarnitine	HMDB0000552		Lipids and lipid-like molecules	Fatty Acyls	Fatty acid esters	98608.1	325760	89896.2	258153	122032	420222	295911	346033	53067.3	234060	71533.9	401021
M119T334_2	119.017	333.738	3-methylthiopropionate	HMDB0001527	C08276	Lipids and lipid-like molecules	Fatty Acyls	Fatty acids and conjugates	2.03394e+06	2.09945e+06	2.12959e+06	1.35452e+06	2.94035e+06	1.58629e+06	2.69988e+06	1.25061e+06	1.67132e+06	2.4934e+06	1841270	2.33856e+06
M149T461	149.024	460.74	3-methylxanthine	HMDB0001886	C16357	Organoheterocyclic compounds	Imidazopyrimidines	Purines and purine derivatives	1.71485e+07	1.10945e+07	1.18096e+07	9.45394e+06	1.70195e+07	1.71463e+07	1.54223e+07	105458	214360	1.06682e+07	1.2256e+07	1.49051e+07
M508T472_1	507.983	472.411	3'-Phosphoadenosine 5'-phosphosulfate (PAPS)	HMDB0001134	C00053	Nucleosides, nucleotides, and analogues	Purine nucleotides	Purine ribonucleotides	113490	54243.9	210636	42500.4	92531.7	63441.7	49625.4	250703	240985	55875.1	86502	67025.8
M108T50	108.056	49.7473	3-pyridinecarboxaldehyde		C07327	Organoheterocyclic compounds	Pyridines and derivatives	Pyridine carboxaldehydes	1.14141e+07	9.25712e+06	1.82842e+07	7.05035e+06	1.07907e+07	1.06531e+07	1.33535e+07	1.70955e+07	1.87145e+07	1.17184e+07	1.02456e+07	1.05111e+07
M152T584	152.072	584.333	3-pyridinepropionic acid						2.37992e+06	2.30867e+06	2.24609e+06	2284775	2.46745e+06	2.31089e+06	27757	2.19718e+06	2.30235e+06	2.40796e+06	2.2641e+06	2.43695e+06
M258T20	257.96	20.1788	3-quinolinecarboxylic acid, 7,8-dichloro-1,4-dihydro-4-oxo-			Organoheterocyclic compounds	Quinolines and derivatives	Quinoline carboxylic acids	174012	168363	173254	165439	255813	201404	166749	197923	366587	179727	181762	153263
M239T300_3	239.106	300.392	4-(2-hydroxyethyl)piperazine-1-ethanesulfonic acid	HMDB0062295		Organoheterocyclic compounds	Diazinanes	Piperazines	384868039	371988223	417291228	249699234	838952873	296752579	746178977	1059526766	1266088783	607079549	336092711	828070090
M251T716	250.987	716.448	4,4'-dichlorobenzophenone		C06643	Benzenoids	Benzene and substituted derivatives	Benzophenones	4.14161e+06	3.91589e+06	5.15276e+06	4.71827e+06	5.24964e+06	3.64842e+06	4.8511e+06	4.63527e+06	4.70868e+06	4.32609e+06	4.51695e+06	4.72974e+06
M154T186	154.086	186.458	4,6-diamino-5-formamidopyrimidine	HMDB0004816	C06502	Organoheterocyclic compounds	Diazines	Pyrimidines and pyrimidine derivatives	3.04414e+06	1.88928e+06	2.22505e+06	2.13974e+06	1.78932e+06	1.92073e+06	3.77147e+06	2.40181e+06	1.31127e+06	2.28702e+06	1.95734e+06	1.80713e+06
M180T34	180.034	34.4077	4,6-dinitro-o-cresol		C18653	Benzenoids	Phenols	Nitrophenols	1.13109e+07	1.80417e+07	1.25656e+07	19590209	1.17765e+07	1.45982e+07	1.23376e+07	1.18831e+07	1.32231e+07	1.96623e+07	1.28557e+07	13291552
M222T456	222.029	456.043	4-amino-5-chloro-1-phenyl-6-pyridazone		C18570	Organoheterocyclic compounds	Diazines	Pyridazines and derivatives	4.21723e+06	3.83116e+06	4.34802e+06	4.91724e+06	3.82361e+06	4.54161e+06	3.53066e+06	3.29211e+06	3.25796e+06	3.87194e+06	5.13605e+06	4.61263e+06
M110T504	110.071	504.163	4-aminophenol	HMDB0001169	C02372	Benzenoids	Benzene and substituted derivatives	Aniline and substituted anilines	1.08454e+07	13559870	2.90541e+07	5.01925e+06	4.11915e+06	20576020	8.89246e+06	1.88386e+07	2.41145e+07	1.09561e+07	6.35664e+06	1.09347e+07
M303T418	303.178	418.089	4-androsten-11.beta.-ol-3,17-dione	HMDB0006773	C05284	Lipids and lipid-like molecules	Steroids and steroid derivatives	Androstane steroids	1.91676e+06	3.66549e+06	4.85633e+06	583876	2.4317e+06	1.50397e+06	2.76217e+06	2.70161e+06	3.00448e+06	774065	1.03802e+06	1.35955e+06
M178T135	178.123	134.565	4-benzofuranethanamine, 2,3-dihydro-.alpha.-methyl-						5183171	6.99603e+06	6.3274e+06	6.45067e+06	6.83913e+06	1.3333e+07	6.28646e+06	6.19659e+06	6.46501e+06	1.40632e+07	6.94986e+06	13796619
M343T423	342.865	422.67	4-hydroxy-2,2',3',5',6'-pentachlorobiphenyl			Benzenoids	Benzene and substituted derivatives	Biphenyls and derivatives	2.41133e+06	2.17937e+06	1.91294e+06	3.17295e+06	2.48906e+06	3.13909e+06	2.82156e+06	2.08941e+06	1.81543e+06	2.65336e+06	2.51519e+06	2.40375e+06
M377T423	376.836	422.538	4-hydroxy-2',3,3',4',5,5'-hexachlorobiphenyl			Benzenoids	Benzene and substituted derivatives	Biphenyls and derivatives	4.60428e+06	3.97635e+06	3.41781e+06	5.4427e+06	4.31946e+06	5.51766e+06	4.89301e+06	3.62646e+06	3.14249e+06	4.50113e+06	3.80481e+06	4.70557e+06
M137T280	137.071	280.241	4-hydroxy-3-methoxybenzyl alcohol	HMDB0032012	C06317	Benzenoids	Phenols	Methoxyphenols	2.26101e+07	2.65508e+07	2.37525e+07	1.54383e+07	1.75711e+07	1.86339e+07	2.03529e+07	2.36413e+07	2.01812e+07	1.98783e+07	1.96846e+07	2.3334e+07
M121T350	121.03	349.885	4-hydroxybenzaldehyde	HMDB0011718	C00633	Organic oxygen compounds	Organooxygen compounds	Carbonyl compounds	9.96207e+06	1.00082e+07	1.0096e+07	9.79876e+06	8.9457e+06	9.6692e+06	9.39156e+06	8.8647e+06	8.9989e+06	9.26541e+06	9.45883e+06	9.61415e+06
M97T25	97.0761	25.2268	4-hydroxyhexenal			Organic oxygen compounds	Organooxygen compounds	Carbonyl compounds	7.7068e+06	8.55562e+06	8.35822e+06	9.68665e+06	1.0305e+07	1.0594e+07	6.76918e+06	3.25208e+06	5.16857e+06	5.69882e+06	6.76214e+06	8.27459e+06
M151T130	151.051	129.536	4-hydroxyphenylacetic acid	HMDB0000020	C00642	Benzenoids	Phenols	1-hydroxy-2-unsubstituted benzenoids	395573	310037	349618	362336	422719	362093	97799.1	345890	284024	273851	144942	347568
M166T165	166.062	164.923	4-hydroxyphenylglycine		C12323	Organic acids and derivatives	Carboxylic acids and derivatives	Amino acids, peptides, and analogues	955602	1.12823e+06	1.0737e+06	1.41567e+06	1.13422e+06	1.17352e+06	1.03116e+06	1.09296e+06	977453	1.27047e+06	1.23501e+06	1.60771e+06
M121T183	121.04	182.904	4-imidazoleacrylic acid	HMDB0000301	C00785	Organoheterocyclic compounds	Azoles	Imidazoles	2818476	2.00894e+06	2.77868e+06	4.63125e+06	2.21388e+06	2.98708e+06	2.0488e+06	1.70995e+06	1.73389e+06	3.00912e+06	2.18995e+06	2.66576e+06
M83T115	83.0605	114.574	4-methyl-1h-pyrazole	HMDB0015344	C07837	Organoheterocyclic compounds	Azoles	Pyrazoles	6.82393e+06	1.59559e+06	6.77674e+06	6.61857e+06	7.1334e+06	6.07893e+06	6.77927e+06	7.16678e+06	6.91893e+06	6.6895e+06	1.7579e+07	6.86682e+06
M125T187	125.071	186.99	4-methylcatechol	HMDB0000873	C06730	Benzenoids	Phenols	Benzenediols	8.33188e+06	8.0092e+06	7.7547e+06	6.06573e+06	1.45942e+07	8.19175e+06	7.25496e+06	7.56487e+06	4.83967e+06	7.14285e+06	8.21228e+06	34075.9
M499T588	498.88	588.231	4mpfos			Organic acids and derivatives	Organic sulfonic acids and derivatives	Organosulfonic acids and derivatives	554090	515468	589062	579271	565117	653582	530888	573156	478094	593583	632344	583165
M177T369	177.025	368.677	4-phenyl-5-methyl-1,2,3-thiadiazole						1.41492e+06	2.2897e+06	983111	1.29075e+06	1.51058e+06	1.47443e+06	1.68927e+06	2.4743e+06	1.51016e+06	1586316	814463	1.86779e+06
M129T51	129.102	50.8506	4-piperidinecarboxamide	HMDB0000661	C00489	Organoheterocyclic compounds	Piperidines	Piperidinecarboxylic acids and derivatives	1.54839e+06	3.57224e+06	1.87477e+06	1.26905e+06	1.52068e+06	1.28891e+06	1.52818e+06	1.3577e+06	1.65513e+06	1.84689e+06	2.01085e+06	1.53162e+06
M144T307_1	143.995	306.704	5-(2-hydroxyethyl)-4-methylthiazole	HMDB0032985	C04294	Organoheterocyclic compounds	Azoles	Thiazoles	338580	312596	322427	262050	340647	345395	348896	315507	334177	343249	356436	311021
M303T213_1	303.05	212.643	5-(4-hydroxyphenyl)-5-phenylhydantoin	HMDB0041905		Organoheterocyclic compounds	Azolidines	Imidazolidines	2.98485e+06	5.89936e+06	4.24478e+06	3.1018e+06	4.26109e+06	3.79001e+06	5.65865e+06	7.1737e+06	5.15773e+06	4.01009e+06	3.41404e+06	6.68024e+06
M449T160	449.245	159.638	5.alpha.-androstan-3.alpha.,17.beta.-diol-o-3-.beta.-glucuronic acid			Lipids and lipid-like molecules	Steroids and steroid derivatives	Steroidal glycosides	9030.04	604893	495449	539999	598351	751864	688214	702513	513247	541099	530848	665514
M369T28	369.174	27.5689	5.alpha.-androstan-3.beta.-ol-17-one sulfate	HMDB0062657		Lipids and lipid-like molecules	Steroids and steroid derivatives	Sulfated steroids	11842.3	8071.27	5903.69	8842.95	6879.01	4849.05	5124.04	9431.09	8896.64	9222.7	18087.4	8715.42
M114T167	114.066	166.631	5-aminolevulinic acid	HMDB0001149	C00430	Organic acids and derivatives	Carboxylic acids and derivatives	Amino acids, peptides, and analogues	2.24278e+07	30371371	2.8718e+07	3.64808e+07	3.42927e+07	3.13189e+07	5.41851e+07	45577141	5.99611e+07	4.37942e+07	2.94455e+07	3.92334e+07
M152T161	152.035	160.916	5-aminosalicylic acid	HMDB0014389	C07138	Benzenoids	Benzene and substituted derivatives	Benzoic acids and derivatives	3.85157e+06	4.7408e+06	3.53306e+06	2.80621e+06	1.96821e+06	3.11552e+06	3.14121e+06	3.16298e+06	2.4528e+06	2.73272e+06	2.25378e+06	3.2639e+06
M100T153	100.076	152.542	5-aminovaleric acid	HMDB0003355	C00431	Organic acids and derivatives	Carboxylic acids and derivatives	Amino acids, peptides, and analogues	45741302	6.98694e+07	8.75266e+07	1.67273e+07	7.17049e+07	4.49239e+07	112374156	4.27512e+07	101332372	2.4982e+07	7.0939e+07	109679076
M381T24_1	381.232	24.4275	5-heptenoic acid, 7-[(1r,2r,3s,5s)-2-[(1e,3s)-3-(2,3-dihydro-1h-inden-2-yl)-3-hydroxy-1-propen-1-yl]-3-fluoro-5-hydroxycyclopentyl]-, (5z)-			Lipids and lipid-like molecules	Fatty Acyls	Fatty acids and conjugates	1.20852e+06	2.18146e+06	918928	1.52061e+06	546449	1.04565e+06	2.29073e+06	806037	600772	1.15597e+06	1.13694e+06	1.03225e+06
M126T581	126.055	581.428	5-methylcytosine	HMDB0002894	C02376	Organoheterocyclic compounds	Diazines	Pyrimidines and pyrimidine derivatives	3.24709e+07	3.41281e+07	2.48384e+07	2.85727e+07	2.10694e+07	2.73736e+07	2.75801e+07	2.06632e+07	2.64502e+07	3.00114e+07	1.86131e+07	2.12829e+07
M322T254	322.055	253.99	5'-phosphoribosyl-5-amino-4-imidazolecarboxamide (aicar)	HMDB0001517	C04677	Nucleosides, nucleotides, and analogues	Imidazole ribonucleosides and ribonucleotides	1-ribosyl-imidazolecarboxamides	2.00196e+06	7.17779e+06	3.14444e+06	2.29407e+06	1.39967e+06	2.71803e+06	2.74942e+06	4.08155e+06	2.09774e+06	1.54027e+06	2.41895e+06	4.3363e+06
M199T178	198.954	178.428	5-sulfosalicylic acid	HMDB0011725	C16199	Benzenoids	Benzene and substituted derivatives	Benzenesulfonic acids and derivatives	3.01317e+07	3.61403e+07	3.91554e+07	2.77192e+07	2.01473e+07	2.9843e+07	2.71099e+07	2.25229e+07	2.48227e+07	4.09178e+07	3.09811e+07	2.6415e+07
M373T510	373.245	509.894	5-trans-latanoprost acid			Lipids and lipid-like molecules	Fatty Acyls	Eicosanoids	168191	180490	401053	131057	236444	142403	171604	249734	347096	232945	301098	157049
M441T27	441.253	26.5178	6,8-dihydroxy-2,2,4,4-tetramethyl-7-(3-methylbutanoyl)-9-(2-methylpropyl)-9h-xanthene-1,3-dione			Organoheterocyclic compounds	Benzopyrans	1-benzopyrans	588579	1.00983e+06	369087	839790	211713	351004	1.44897e+06	351197	288282	527348	593132	545739
M427T25	426.968	25.0275	6:2 fluorotelomer sulfonic acid			Organic acids and derivatives	Organic sulfonic acids and derivatives	Organosulfonic acids and derivatives	313483	211391	310901	567520	107217	266748	260375	306034	287774	204945	517518	548914
M385T26_2	385.293	26.1667	6h-dibenzo[b,d]pyran, 3-(1,1-dimethylheptyl)-6a,7,10,10a-tetrahydro-1-methoxy-6,6,9-trimethyl-, (6ar,10ar)-			Organoheterocyclic compounds	Benzopyrans	1-benzopyrans	540883	862300	384649	663144	229221	340463	1.15546e+06	359103	318977	561389	524419	391214
M492T414	492.125	413.834	6h-thieno[3,2-f][1,2,4]triazolo[4,3-a][1,4]diazepine-6-acetamide, 4-(4-chlorophenyl)-n-(4-hydroxyphenyl)-2,3,9-trimethyl-, (6s)-						157297	327427	135560	80170.7	144771	129972	186464	389133	150254	136050	203537	361161
M168T456	168.043	455.685	6-Hydroxydopamine	HMDB0001537		Benzenoids	Phenols	Benzenediols	3.28241e+07	3.40537e+07	3.36051e+07	2.97865e+07	36093634	3.31277e+07	3.67159e+07	3.94055e+07	3.58957e+07	3.59063e+07	3.97233e+07	4.25835e+07
M161T582	161.071	582.453	6-methylchromone			Organoheterocyclic compounds	Benzopyrans	1-benzopyrans	847306	1.20639e+06	773651	708860	852734	1.04799e+06	640353	573758	820612	872942	867573	782544
M271T224	271.075	223.533	7,3',4'-trihydroxyisoflavone	HMDB0041655	C14313	Phenylpropanoids and polyketides	Isoflavonoids	Isoflav-2-enes	1.18377e+07	2.00777e+07	1.27059e+07	1.11475e+07	1.04454e+07	1.35777e+07	1.22205e+07	1.37374e+07	9.6665e+06	10436384	1.11094e+07	1.46024e+07
M195T586	195.186	585.811	7,8-dihydro-.alpha.-ionone			Lipids and lipid-like molecules	Prenol lipids	Sesquiterpenoids	631122	451363	465902	480083	771349	832776	481472	404893	700681	504843	806453	605609
M383T157	383.316	157.153	7.alpha.-hydroxy-4-cholesten-3-one	HMDB0001993	C05455	Lipids and lipid-like molecules	Steroids and steroid derivatives	Cholestane steroids	51418.7	94332.6	70049.4	4.80995e+06	4.53928e+06	4.54176e+06	4.65493e+06	3.93335e+06	4.36324e+06	5.28972e+06	5.15226e+06	6.00489e+06
M231T586	231.113	585.773	7-demethylsuberosin		C18083	Phenylpropanoids and polyketides	Coumarins and derivatives	Hydroxycoumarins	403787	290557	828952	373388	368155	761106	388652	445746	705861	478995	402819	885476
M214T303	214.039	302.92	7-ethoxyresorufin		C13630	Organoheterocyclic compounds	Benzoxazines	Phenoxazines	877113	1.01337e+06	1.26858e+06	846199	1.01952e+06	984261	706377	820871	980211	767492	1.02967e+06	830477
M186T221	186.114	220.876	7-keto-8-aminopelargonic acid		C01092	Lipids and lipid-like molecules	Fatty Acyls	Fatty acids and conjugates	2.56714e+06	1.81023e+06	1.56083e+06	1400011	1.10456e+06	1.28821e+06	1.33667e+06	1.17687e+06	1.2488e+06	1.23832e+06	1.34947e+06	1.40799e+06
M164T67	164.002	66.9608	7-methylguanine	HMDB0000897	C02242	Organoheterocyclic compounds	Imidazopyrimidines	Purines and purine derivatives	364334	407597	380359	271259	65269.4	282498	347249	390867	288340	454578	23730.2	346111
M221T36	221.155	36.0996	8,11-tridecadienoic acid, 13-(3-pentyl-2-oxiranyl)-, (8z,11z)-			Lipids and lipid-like molecules	Fatty Acyls	Fatty acids and conjugates	6.86499e+06	6.11681e+06	4.26455e+06	6.73086e+06	4.75927e+06	4.72728e+06	4.63387e+06	4.9232e+06	5.71872e+06	5.19261e+06	4.17511e+06	4.20333e+06
M219T188	219.076	188.478	8-acetyl-7-methoxycoumarin						1.78446e+06	2.48984e+06	2.30926e+06	1.51558e+06	1.7699e+06	1.73045e+06	1.5506e+06	1.55962e+06	1.75645e+06	1.92582e+06	1.93775e+06	1.96556e+06
M213T138	213.015	137.542	8-chlorotheophylline			Organoheterocyclic compounds	Imidazopyrimidines	Purines and purine derivatives	2.73045e+06	2.51805e+06	2.94611e+06	2.70113e+06	2.89107e+06	2.82489e+06	2.79687e+06	2.88648e+06	3.25112e+06	2.63781e+06	2.80392e+06	2.92895e+06
M321T24_2	321.211	23.7437	8-gingerol		C17495	Benzenoids	Phenols	Methoxyphenols	985800	1.01378e+06	983530	1.11542e+06	951775	1.1086e+06	795802	822313	729901	1.21925e+06	976663	858095
M242T269	242.1	268.754	Acadesine (drug)	HMDB0062179	C04663				1.30161e+06	1.52102e+06	2.29544e+06	56902	154994	93932.9	204041	152469	260991	116399	128425	138169
M150T293_2	150.042	292.791	Acetaminophen	HMDB0001859	C06804	Benzenoids	Phenols	1-hydroxy-2-unsubstituted benzenoids	2.58219e+06	867441	1.07006e+06	704283	960933	1.62404e+06	702560	609111	894735	934749	1.09145e+06	757811
M73T300	73.0294	299.743	Acetol	HMDB0006961	C05235	Organic oxygen compounds	Organooxygen compounds	Carbonyl compounds	8.80086e+06	4.70182e+06	4.50438e+06	8.01439e+06	4.85853e+06	4.25119e+06	8.33907e+06	4.75442e+06	4.7723e+06	4.27425e+06	4.43604e+06	4.66856e+06
M139T695	138.971	694.917	Acetyl phosphate	HMDB0001494	C00227	Organic acids and derivatives	Organic phosphoric acids and derivatives	Phosphate esters	813493	759832	792031	663515	1.85018e+06	762671	1.06398e+06	732212	712565	706003	755215	578185
M204T294_3	204.123	294.035	Acetylcarnitine		C02571	Lipids and lipid-like molecules	Fatty Acyls	Fatty acid esters	5.85195e+07	7.94721e+07	6.83632e+07	9.53891e+07	9.61442e+07	108455746	154250109	155834373	138309603	123128121	165733042	175939836
M146T363	146.118	363.255	Acetylcholine	HMDB0000895	C01996	Organic nitrogen compounds	Organonitrogen compounds	Quaternary ammonium salts	5.36361e+06	6.47888e+06	5.78717e+06	1.45366e+07	1.64881e+07	1.71355e+07	1.54548e+07	1.63869e+07	1.53769e+07	10902517	1.26877e+07	1.51817e+07
M116T300	116.025	300.418	Acetylglycine	HMDB0000532	C02055	Organic acids and derivatives	Carboxylic acids and derivatives	Amino acids, peptides, and analogues	5.54051e+06	6.0527e+06	6.47654e+06	6.49005e+06	4.95763e+06	2.81861e+06	3.1948e+06	5.38542e+06	5.2476e+06	4.7881e+06	4.80024e+06	5.17298e+06
M136T165	136.062	164.81	Adenine	HMDB0000034	C00147	Organoheterocyclic compounds	Imidazopyrimidines	Purines and purine derivatives	254248270	245678726	219726993	169771600	189435094	179086536	199611693	267649032	176473291	211621868	232444114	240361312
M268T167	268.104	167.225	Adenosine	HMDB0000050	C00212	Nucleosides, nucleotides, and analogues	Purine nucleosides		102164397	193076396	166408431	7.34133e+07	6.22583e+07	4.11259e+07	5.93401e+07	178296709	142772317	4.74448e+07	211567304	8.18874e+07
M328T279	328.046	278.953	Adenosine 3',5'-cyclic monophosphate	HMDB0000058	C00575	Nucleosides, nucleotides, and analogues	Purine nucleotides	Cyclic purine nucleotides	3.02854e+06	2.16461e+06	640687	2.4894e+06	1.90925e+06	1.31462e+06	2.1723e+06	2.58368e+06	318746	3.46094e+06	434038	3.37319e+06
M328T294_1	328.053	293.907	Adenosine 3',5'-cyclic phosphate (cAMP)						121789	115469	146577	132723	264979	120128	189845	160600	103960	164791	160692	177133
M426T280	426.013	279.973	Adenosine 3',5'-diphosphate (pap)	HMDB0000061	C00054	Nucleosides, nucleotides, and analogues	Purine nucleotides	Purine ribonucleotides	210173	135245	22710.5	142010	114888	56654.8	155295	137440	55118.4	174145	88518.8	195044
M426T447	426.023	447.322	Adenosine 5'-diphosphate	HMDB0001341	C00008	Nucleosides, nucleotides, and analogues	Purine nucleotides	Purine ribonucleotides	2.15767e+06	2.24884e+06	3.25067e+06	1.31319e+06	2.24495e+06	1.40774e+06	2.43657e+06	4.23045e+06	4.20498e+06	2.27027e+06	2.72937e+06	2.18155e+06
M560T411	560.08	410.534	Adenosine 5'-diphosphoribose	HMDB0001178	C00301	Nucleosides, nucleotides, and analogues	Purine nucleotides	Purine nucleotide sugars	672227	2.73802e+06	154796	1.52824e+06	2.5352e+06	3.88106e+06	3.27599e+06	4.667e+06	919151	3.26628e+06	384990	3.40794e+06
M348T417	348.071	416.548	Adenosine 5'-monophosphate	HMDB0000045	C00020	Nucleosides, nucleotides, and analogues	Purine nucleotides	Purine ribonucleotides	2.74502e+07	1.81967e+07	3.61848e+07	7.18916e+06	27961727	8.05274e+06	2.17224e+07	2.60729e+07	4.19649e+07	23778668	38715427	2.24507e+07
M346T416_2	346.056	415.97	Adenosine 5'-phosphosulfate	HMDB0001003	C00224	Nucleosides, nucleotides, and analogues	Purine nucleotides	Purine ribonucleotides	1.24184e+07	7.42189e+06	1.53003e+07	3.03981e+06	1.25519e+07	3.23919e+06	9.00696e+06	11602732	1.88842e+07	1.0363e+07	1.70373e+07	9.91039e+06
M508T479	508.004	478.637	Adenosine 5'-triphosphate (atp)	HMDB0000538	C00002	Nucleosides, nucleotides, and analogues	Purine nucleotides	Purine ribonucleotides	386651	411567	634954	536011	422380	529165	381911	728204	850719	482277	528687	274682
M145T372	145.051	372.014	Adipic acid	HMDB0000448	C06104	Lipids and lipid-like molecules	Fatty Acyls	Fatty acids and conjugates	4.23478e+06	4.48052e+06	4.26432e+06	4.5e+06	4.3628e+06	4.85483e+06	5.11049e+06	4.35392e+06	4.13801e+06	5.00904e+06	4.29403e+06	5.27048e+06
M558T411	558.065	410.979	Adp-ribose	HMDB0001178	C00301	Nucleosides, nucleotides, and analogues	Purine nucleotides	Purine nucleotide sugars	642679	2.59149e+06	109149	1.2446e+06	2.24579e+06	2.48434e+06	2.79833e+06	3.27629e+06	863096	2.57108e+06	320666	3.22206e+06
M114T41	114.091	40.9473	Agmatine	HMDB0001432	C00179	Organic nitrogen compounds	Organonitrogen compounds	Guanidines	1.91066e+07	4.69331e+07	21607198	1.19972e+07	1.05977e+07	1.07952e+07	1.07369e+07	1.13079e+07	1.17482e+07	3.29576e+07	1.269e+07	1.37439e+07
M161T99	161.092	98.7355	Ala-Ala	HMDB0000303	C00398	Organoheterocyclic compounds	Indoles and derivatives	Tryptamines and derivatives	4.53446e+06	4.49492e+06	7.02521e+06	2.68184e+06	2.9069e+06	1.88901e+06	2.47205e+06	3.90476e+06	4.58459e+06	2.69083e+06	2.40627e+06	3.15972e+06
M244T402	244.142	401.757	Ala-Arg			Organic acids and derivatives	Carboxylic acids and derivatives	Amino acids, peptides, and analogues	1.00711e+06	1.42717e+06	1.26775e+06	370606	589453	529266	759871	1.21311e+06	1.14089e+06	467671	469836	913898
M375T379	375.199	379.351	Ala-Glu-Arg			Organic acids and derivatives	Carboxylic acids and derivatives	Amino acids, peptides, and analogues	496619	887055	826848	286728	662516	327166	580233	1.02341e+06	1.28844e+06	716245	354164	605675
M218T420	218.15	420.347	Ala-Lys			Organic acids and derivatives	Carboxylic acids and derivatives	Amino acids, peptides, and analogues	907171	1.54497e+06	1.85967e+06	457007	796169	547241	926147	1.83371e+06	2.47592e+06	522131	774925	1.1662e+06
M189T315	189.088	315.489	Ala-Thr			Organic acids and derivatives	Carboxylic acids and derivatives	Amino acids, peptides, and analogues	195128	914563	382461	202666	336111	215505	517892	1.06122e+06	450508	325733	267174	651105
M361T392_2	361.183	391.832	Aldosterone	HMDB0000037	C01780	Lipids and lipid-like molecules	Steroids and steroid derivatives	Hydroxysteroids	1.10073e+07	1.84037e+07	34090364	5.77873e+06	1.76068e+07	9.07151e+06	1.41584e+07	2.42051e+07	5.00483e+07	1.36161e+07	13830368	1.1729e+07
M354T301	354.17	300.675	Alitame			Organic acids and derivatives	Carboxylic acids and derivatives	Amino acids, peptides, and analogues	5.03624e+06	4.55243e+06	4.84018e+06	2.04579e+06	1.28465e+07	3.23625e+06	8.82351e+06	1.34853e+07	2.03217e+07	5.96254e+06	4.00505e+06	10523634
M157T182_2	157.037	182.479	Allantoin	HMDB0000462	C01551	Organoheterocyclic compounds	Azoles	Imidazoles	2.24675e+06	2.72195e+06	2.56247e+06	2.99016e+06	1.26193e+06	2.8106e+06	1.96399e+06	1.15633e+06	1.47469e+06	2.29286e+06	3.55966e+06	1.71938e+06
M269T37_1	269.212	36.6333	All-trans-4-ketoretinoic acid	HMDB0006285		Lipids and lipid-like molecules	Prenol lipids	Retinoids	2.27808e+06	2.24641e+06	2.41815e+06	9.8978e+06	9.11234e+06	5.89135e+06	5.88169e+06	6.9202e+06	6.02102e+06	5.31367e+06	7.42768e+06	8.1382e+06
M98T260	98.0246	260.406	Allyl isothiocyanate	HMDB0005843	C19317				3.54274e+06	3.59171e+06	3.51979e+06	2.85645e+06	2.7606e+06	3.97209e+06	2.93865e+06	2.8622e+06	3.09136e+06	2.95605e+06	3.25911e+06	3.1159e+06
M259T385	259.019	385.072	alpha-D-Galactose 1-phosphate	HMDB0000645	C00446	Organic oxygen compounds	Organooxygen compounds	Carbohydrates and carbohydrate conjugates	66241.2	67417.7	86114.1	36551.3	26534.9	40804.4	31619.8	55223.3	42519.3	58791.8	21903.2	50735.6
M250T584	250.178	584.309	Alprenolol	HMDB0015004		Benzenoids	Phenol ethers		4.6442e+06	3.94516e+06	4.4775e+06	5.81647e+06	6.13761e+06	6.09158e+06	6.35794e+06	6.89633e+06	3.88492e+06	3.31446e+06	7.08626e+06	3.3949e+06
M609T28_2	609.137	27.8479	Amarogentin		C09767	Benzenoids	Benzene and substituted derivatives	Biphenyls and derivatives	2.12567e+06	2.16431e+06	2.64151e+06	1.83831e+06	1.8017e+06	2.15422e+06	1.83758e+06	1.7719e+06	1.71296e+06	1.85706e+06	1.84526e+06	1.77365e+06
M473T25	473.283	24.943	Amastatin			Organic acids and derivatives	Peptidomimetics	Hybrid peptides	1.19499e+07	1.16781e+07	1.20215e+07	1.0157e+07	9.77211e+06	1.14179e+07	9.96817e+06	9.5641e+06	9.67444e+06	1.02011e+07	1.06846e+07	1.0768e+07
M232T428	232.141	427.552	Aminophenazone	HMDB0015493	C07539	Organoheterocyclic compounds	Azoles	Pyrazoles	2.91298e+06	4.94157e+06	5.31625e+06	837129	1.38983e+06	1.32095e+06	2.18318e+06	3.73141e+06	4.18178e+06	1.28116e+06	2.03726e+06	2.44848e+06
M350T300	350.111	300.481	Ampicillin	HMDB0014559	C06574	Organoheterocyclic compounds	Lactams	Beta lactams	444882	356325	399848	275415	604046	367987	551206	354776	370686	362731	406496	600243
M528T389	528.199	389.055	Amprenavir	HMDB0014839	C08086	Benzenoids	Benzene and substituted derivatives	Benzenesulfonamides	1.99792e+06	2.38296e+06	1.59563e+06	1.11958e+06	2.75198e+06	1.38895e+06	1.459e+06	1.59158e+06	1.66442e+06	1.29523e+06	1.67527e+06	2.55699e+06
M484T136	484.282	136.49	Androstan-3-ol-17-one 3-glucuronide	HMDB0004484	C11136	Lipids and lipid-like molecules	Steroids and steroid derivatives	Steroidal glycosides	7.94215e+06	8.23967e+06	8.11164e+06	6.9687e+06	7.32875e+06	9.29794e+06	7.92393e+06	7.07309e+06	7.64794e+06	9.85118e+06	9.3919e+06	9.62977e+06
M465T218	465.24	217.979	Androsterone glucuronide	HMDB0002829	C11135	Lipids and lipid-like molecules	Steroids and steroid derivatives	Steroidal glycosides	1.49077e+06	1.59355e+06	1.40904e+06	476464	658242	627866	511939	594029	609982	659777	426501	604378
M178T395	178.009	394.943	Anilazine		C18935	Benzenoids	Benzene and substituted derivatives	Aniline and substituted anilines	4.55527e+06	4.51682e+06	6.03803e+06	2.25003e+06	3.45337e+06	2.6625e+06	2.33521e+06	2.7467e+06	3.79979e+06	2.36752e+06	3.60434e+06	2.60041e+06
M199T372	198.974	372.44	Anilofos		C18394	Benzenoids	Benzene and substituted derivatives	Anilides	2.29878e+06	3.07582e+06	1.38554e+06	3.38551e+06	3.19527e+06	3.19415e+06	4.73425e+06	4.86998e+06	3.1762e+06	4.39348e+06	1.8808e+06	4.73508e+06
M303T37	303.233	36.6066	Arachidonic acid (peroxide free)	HMDB0001043	C00219	Lipids and lipid-like molecules	Fatty Acyls	Fatty acids and conjugates	130746878	132509770	121559962	100992718	104979385	108298989	114083198	125923915	113895340	108082988	106913820	111541830
M124T65	124.087	65.3473	Arecaidine	HMDB0030352	C10128				427194020	534462292	472184151	441212914	543727910	522243537	190917055	525520956	431050944	173357950	461079685	329987836
M322T324	322.188	324.404	Arg-phe			Organic acids and derivatives	Carboxylic acids and derivatives	Amino acids, peptides, and analogues	613554	750427	1.15053e+06	233055	530577	414151	698235	1.28671e+06	1.58144e+06	293121	542893	489980
M305T75	305.157	75.1992	Artemisinin		C09538	Lipids and lipid-like molecules	Prenol lipids	Terpene lactones	1.34044e+06	1.74502e+06	2.43266e+06	2.18449e+06	210113	1.47966e+06	1.11251e+06	761711	748587	1.76775e+06	1.99239e+06	2.06501e+06
M453T159	453.344	159.452	Asiatic acid	HMDB0035782	C08617	Lipids and lipid-like molecules	Prenol lipids	Triterpenoids	1.4379e+06	1.61867e+06	1.59147e+06	1.60152e+06	1.28882e+06	1.85042e+06	2.22464e+06	2.38673e+06	1.4372e+06	1.78651e+06	1.38582e+06	1.52182e+06
M209T32_1	209.154	32.4021	Asn-Arg-Lys			Organic acids and derivatives	Carboxylic acids and derivatives	Amino acids, peptides, and analogues	3.87262e+07	3.18726e+07	1.88812e+07	2.64741e+07	1.4884e+07	2.34321e+07	1.94635e+07	1.78986e+07	2.64789e+07	1.02983e+07	1.77618e+07	2.18715e+07
M230T240	230.121	240.166	Asn-Pro			Organic acids and derivatives	Carboxylic acids and derivatives	Amino acids, peptides, and analogues	950553	1.13381e+06	1.09469e+06	689630	899296	876405	734393	734671	982907	735366	1.19433e+06	905097
M475T425	475.263	424.625	Asn-Trp-Arg			Organic acids and derivatives	Carboxylic acids and derivatives	Amino acids, peptides, and analogues	758596	607994	1.14686e+06	119399	431207	197191	516384	751709	2.0353e+06	222697	393240	339353
M272T28	272.151	28.3816	Asp-Arg	HMDB0014712	C01479				4.98171e+06	3.59522e+06	3.54696e+06	3.35053e+06	2.57486e+06	2.96594e+06	3.48873e+06	3.04619e+06	3.75939e+06	3.48448e+06	3.28049e+06	3.45848e+06
M247T452	247.057	451.952	Asp-Asp			Organic acids and derivatives	Carboxylic acids and derivatives	Amino acids, peptides, and analogues	5.30648e+06	7.37281e+06	3.8839e+06	2.32167e+06	3.16087e+06	3.35469e+06	3.17808e+06	2.86793e+06	1.8603e+06	2.70551e+06	2.34642e+06	3.46553e+06
M174T221	174.039	220.727	Atrazine desisopropyl	HMDB0031310	C06556	Organoheterocyclic compounds	Triazines	Aminotriazines	941177	2.94832e+06	1.04006e+06	1.2061e+06	760307	1.5367e+06	1.5173e+06	1.83503e+06	868097	1.10325e+06	948080	2.17039e+06
M302T290	302.031	289.514	Azaconazole		C18701	Benzenoids	Benzene and substituted derivatives	Halobenzenes	1072533	986029	1.33518e+06	574441	1.03276e+06	897152	1.0402e+06	1.41855e+06	1.55239e+06	898081	1.05429e+06	1.05681e+06
M279T303	278.955	303.269	Azamethiphos		C18702				7.66362e+06	3.2657e+06	7.8023e+06	3.91603e+06	3.75356e+06	4.52497e+06	1.34153e+07	4.63007e+06	4.68948e+06	3.88567e+06	9.59452e+06	5.33521e+06
M187T37	187.098	37.0162	Azelaic acid	HMDB0000784	C08261	Lipids and lipid-like molecules	Fatty Acyls	Fatty acids and conjugates	728952	991339	1.31382e+06	807061	438657	681692	728720	767202	490317	337974	637724	672776
M240T395	239.983	395.387	Barbamate		C19059	Benzenoids	Benzene and substituted derivatives	Phenylcarbamic acid esters	1.13086e+06	897603	1.42353e+06	580649	798420	643969	669700	818239	1.08562e+06	766506	884364	576474
M348T305	348.17	304.775	Benalaxyl		C10929	Organic acids and derivatives	Carboxylic acids and derivatives	Amino acids, peptides, and analogues	656346	1.16989e+06	802100	231923	1.03381e+06	283232	668881	1.18466e+06	1.55829e+06	664002	397687	733321
M265T707	265.004	707.022	Benzamide, 2-[(2-chloro-4-iodophenyl)amino]-n-(cyclopropylmethoxy)-3,4-difluoro-			Benzenoids	Benzene and substituted derivatives	Benzoic acids and derivatives	3.08327e+06	4.17154e+06	2.66647e+06	2.38138e+06	2.47271e+06	3.40043e+06	3.30168e+06	2.86138e+06	2.95025e+06	3.05179e+06	2.90759e+06	3.44883e+06
M290T150	290.269	149.714	Benzamide, n-(5z,8z,11z,14z)-5,8,11,14-eicosatetraen-1-yl-4-hydroxy-			Benzenoids	Benzene and substituted derivatives	Benzoic acids and derivatives	1.81745e+06	1.42289e+06	1.63958e+06	2.48232e+06	1.38707e+06	1.68211e+06	1.83628e+06	2.06502e+06	1.54664e+06	1.70455e+06	1.31776e+06	1.73554e+06
M254T386_1	253.999	386.284	Benzenesulfonic acid, 2-methyl-5-nitro-, 2-[(6-bromoimidazo[1,2-a]pyridin-3-yl)methylene]-1-methylhydrazide			Benzenoids	Benzene and substituted derivatives	Benzenesulfonamides	1.80048e+06	1.85669e+06	1.92783e+06	1.62945e+06	1.5359e+06	1.67047e+06	1.75816e+06	1.44406e+06	1.45141e+06	1.91872e+06	1.78036e+06	1.87109e+06
M249T25	248.973	25.3715	Benzenethiol, 4,4'-thiobis-			Organosulfur compounds	Thioethers	Aryl thioethers	3.91199e+06	3.99509e+06	4.60184e+06	4.43164e+06	8.82828e+06	9.09722e+06	4.50119e+06	4.05726e+06	4.55552e+06	4.52597e+06	2.78378e+06	4.2578e+06
M119T64	119.06	63.5707	Benzimidazole	HMDB0015695	C02009				4.61993e+06	4.88491e+06	5.14983e+06	3841198	4.43012e+06	4.35075e+06	4.10573e+06	4.13175e+06	4.57245e+06	3.71166e+06	4.34012e+06	4.30987e+06
M121T578	121.03	577.563	Benzoic acid	HMDB0001870	C00180	Benzenoids	Benzene and substituted derivatives	Benzoic acids and derivatives	1.49848e+07	1.6977e+07	9.10379e+06	1.63832e+07	1.67003e+07	1.64646e+07	1.61148e+07	1.90311e+07	1.60857e+07	1.74339e+07	2.478e+07	16007062
M203T456	202.977	456.353	Benzoic acid, 3,6-dichloro-2-methoxy-		C18597	Benzenoids	Benzene and substituted derivatives	Benzoic acids and derivatives	3.27847e+06	3.68666e+06	3.45526e+06	2.5905e+06	4.09153e+06	3.29949e+06	4.05926e+06	4.71005e+06	4.49819e+06	3.87493e+06	3.43797e+06	4.58408e+06
M91T33	91.0543	32.7286	Benzyl alcohol	HMDB0003119	C00556	Benzenoids	Benzene and substituted derivatives	Benzyl alcohols	1.69162e+07	2.00677e+07	1.84402e+07	1.50108e+07	1.36799e+07	1.70318e+07	3.53705e+07	1.18819e+07	14590765	14257822	1.35338e+07	1.42371e+07
M118T265_2	118.086	265.001	Betaine	HMDB0000043	C00719	Organic acids and derivatives	Carboxylic acids and derivatives	Amino acids, peptides, and analogues	164172856	164801133	158993772	208148383	210048102	216332960	230331521	242204346	217306250	248813338	221859891	258793885
M315T429_3	315.172	428.531	Beta-octylglucoside			Lipids and lipid-like molecules	Fatty Acyls	Fatty acyl glycosides	216732	135880	178053	56247	165081	119451	62781.8	114484	71792.6	69226.9	42406.6	101141
M439T152	439.378	152.115	Betulinic acid	HMDB0030094	C08619	Lipids and lipid-like molecules	Prenol lipids	Triterpenoids	5.24072e+06	3.45258e+06	40752.9	5.98618e+06	5.44055e+06	5.58765e+06	7.0586e+06	5.80108e+06	7.03219e+06	6.15093e+06	7.60682e+06	7.2133e+06
M368T372	368.11	372.212	Bicuculline		C09364				217252	244394	100248	377281	297604	292224	460239	561458	255674	475766	125897	617610
M553T300	553.115	300.067	Bilobetin	HMDB0030833		Phenylpropanoids and polyketides	Flavonoids	Biflavonoids and polyflavonoids	1.57389e+06	1.57858e+06	1.58739e+06	697483	3.46926e+06	979678	3.41787e+06	5.2455e+06	5.82569e+06	2.95677e+06	1247295	3.94457e+06
M307T299	307.084	299.099	Bisdemethoxycurcumin	HMDB0002114	C17743	Phenylpropanoids and polyketides	Diarylheptanoids	Linear diarylheptanoids	540496	760346	631179	550561	1.08304e+06	928500	1.39456e+06	1.69541e+06	1.85377e+06	976823	757979	1.31659e+06
M363T417	363.165	417.446	Bisphenol a diglycidyl ether	HMDB0032737	C14348	Benzenoids	Benzene and substituted derivatives	Diphenylmethanes	220688	242133	348064	190298	257494	192312	245741	262986	287027	229730	281265	234424
M469T390_2	469.079	389.75	Bispyribac		C10915	Organic oxygen compounds	Organooxygen compounds	Ethers	746575	1.35749e+06	1.50202e+06	1.08065e+06	1.62364e+06	1.65063e+06	1.79774e+06	2.45293e+06	2.54326e+06	1.52081e+06	1.7884e+06	1.6762e+06
M396T291	396.026	290.767	Bixafen			Benzenoids	Benzene and substituted derivatives	Anilides	1.31945e+06	1.19015e+06	1.50906e+06	1.03793e+06	1.20162e+06	1.21162e+06	1.23255e+06	1.14369e+06	1.22072e+06	1.24798e+06	1.2967e+06	1.26046e+06
M444T136	444.289	135.524	Borrelidin		C15687				244663	225341	226462	235931	171635	187969	79315.2	231571	158895	314963	368436	396058
M137T444	136.965	444.453	Brugierol (not validated)			Organoheterocyclic compounds	Dithiolanes	1,2-dithiolanes	7.64243e+06	1.997e+07	1.4045e+07	7.87314e+06	1.09798e+07	1.12769e+07	1.0848e+07	13249376	1.09415e+07	8.96468e+06	9.46837e+06	1.68734e+07
M166T680	166.098	679.624	Bupirimate		C18776	Organoheterocyclic compounds	Diazines	Pyrimidines and pyrimidine derivatives	4.25527e+07	4.1322e+07	2.67432e+07	3.57303e+07	3.02647e+07	6.45244e+07	5.44108e+07	6.07711e+07	4.12177e+07	2.5068e+07	2.7292e+07	6.17128e+07
M201T41	201.11	40.9052	Buprofezin		C10912				2.54252e+06	2.65198e+06	2.36665e+06	3.15045e+06	1.9945e+06	3.02798e+06	3.15085e+06	3.56113e+06	2.72977e+06	3.72606e+06	2.78522e+06	3.75352e+06
M333T254	333.08	253.898	Butamifos		C11022	Benzenoids	Benzene and substituted derivatives	Nitrobenzenes	410482	657383	710053	720712	723591	1.16819e+06	1.1028e+06	1.54831e+06	1.39355e+06	811848	748017	1.19852e+06
M227T318	227.068	317.675	Butyric acid, 4-[(4-chloro-o-tolyl)oxy]-		C18529				3.93745e+06	3.95221e+06	3.47039e+06	4.19226e+06	3.4212e+06	3.78204e+06	3.72886e+06	4.28977e+06	3.5909e+06	4.19064e+06	4.25576e+06	5.56982e+06
M863T181	862.625	181.494	C16 lactosyl ceramide (d18:1/16:0)	HMDB0006750		Lipids and lipid-like molecules	Sphingolipids	Glycosphingolipids	2.00052e+06	2.67184e+06	2.07768e+06	2.72263e+06	1.69904e+06	2.66261e+06	1.63529e+06	1.67816e+06	1.42917e+06	2.62467e+06	3.44468e+06	2.59283e+06
M363T33	363.29	33.3978	Calcitriol		C01673	Lipids and lipid-like molecules	Steroids and steroid derivatives	Vitamin D and derivatives	9.55478e+06	1.1291e+07	1.20859e+07	1.38887e+07	1.27118e+07	1.34516e+07	1.61797e+07	1.36039e+07	1.3714e+07	1.41185e+07	1.30955e+07	14744805
M115T139	115.123	138.528	Caldine	HMDB0011634	C03375	Organic nitrogen compounds	Organonitrogen compounds	Amines	1.03395e+07	1.48161e+07	1.48971e+07	1.04121e+07	1.24528e+07	1.7163e+07	1.45201e+07	1.64984e+07	1.61051e+07	2.56992e+07	39721163	1.3673e+07
M330T390	330.073	389.759	Camp	HMDB0000058	C00575	Nucleosides, nucleotides, and analogues	Purine nucleotides	Cyclic purine nucleotides	1.12661e+06	2.29049e+06	2.20035e+06	988838	1.20136e+06	1.22181e+06	1.3755e+06	2.24226e+06	2.33184e+06	1.21243e+06	2.36163e+06	2.28908e+06
M171T37_2	171.139	36.7411	Capric acid	HMDB0000511	C01571	Lipids and lipid-like molecules	Fatty Acyls	Fatty acids and conjugates	2.00093e+06	1.79167e+06	1.8647e+06	5.64836e+07	6.85846e+07	6.38794e+07	5.41967e+07	5.61857e+07	5.72961e+07	5.95784e+07	6.66132e+07	5.6638e+07
M143T146	143.108	146.262	Caprylic acid	HMDB0000482/HMDB0062511	C06423	Lipids and lipid-like molecules	Fatty Acyls	Fatty acids and conjugates	858886	1.01862e+06	492707	1.12522e+06	510644	1.06362e+06	1.02895e+06	917163	1.0737e+06	987425	935273	1.00998e+06
M593T191	593.33	190.868	Carbenoxolone			Lipids and lipid-like molecules	Prenol lipids	Triterpenoids	5.20301e+07	5.53364e+07	4.60929e+07	3.24511e+07	38039688	2.80596e+07	2.97396e+07	2.7946e+07	34153564	4.03962e+07	3.76102e+07	36181120
M355T397	355.012	396.892	Carboplatin	HMDB0015093		Organic acids and derivatives	Carboxylic acids and derivatives	Dicarboxylic acids and derivatives	3.41945e+06	5.97595e+06	5.03491e+06	4.66052e+06	5.18197e+06	5.8668e+06	5.91329e+06	7.38347e+06	5.05595e+06	5.86346e+06	3.69702e+06	6.02256e+06
M315T300	315.018	299.781	Carboxyphosphamide	HMDB0060449	C07646	Organic nitrogen compounds	Organonitrogen compounds	Nitrogen mustard compounds	4.13482e+07	4.2128e+07	4.75104e+07	2.26998e+07	5.09959e+07	2.56943e+07	6.80821e+07	8.80267e+07	8.77671e+07	6.20693e+07	3.38349e+07	7.25925e+07
M414T416	414.017	416.007	Carfentrazone-ethyl		C11094	Organoheterocyclic compounds	Azoles	Triazoles	1.70421e+06	1.07173e+06	2.16716e+06	481275	1.81014e+06	503306	1.36195e+06	1.638e+06	2.52265e+06	1.68608e+06	2.17447e+06	1.54255e+06
M162T390_2	162.113	390.445	Carnitine		C00487	Organic nitrogen compounds	Organonitrogen compounds	Quaternary ammonium salts	310036	276519	273110	516074	467953	527826	1.12419e+06	581672	676255	467098	566571	651447
M272T303	272.045	303.099	Carprofen	HMDB0014959	C18364	Organoheterocyclic compounds	Indoles and derivatives	Carbazoles	652121	678025	809978	510123	535590	635849	400504	503796	605603	502358	663650	495185
M407T214	407.19	213.797	Carvedilol	HMDB0015267	C06875	Organoheterocyclic compounds	Indoles and derivatives	Carbazoles	140454	285095	212433	255300	175720	269487	248341	158133	139610	176919	184465	211236
M205T383	205.053	382.928	Catalposide		C09775	Organic oxygen compounds	Organooxygen compounds	Carbohydrates and carbohydrate conjugates	1.03027e+06	1.04677e+06	1.02058e+06	683999	677252	622521	724785	647018	697576	744497	837606	865617
M445T434	445.054	433.931	Cdp-ethanolamine	HMDB0001564	C00570	Nucleosides, nucleotides, and analogues	Pyrimidine nucleotides	Pyrimidine ribonucleotides	516277	587875	1.01541e+06	1.305e+06	2.62291e+06	1.83965e+06	1.43435e+06	1.76458e+06	2.00968e+06	1.58542e+06	2.0089e+06	1.85113e+06
M354T442_2	354.062	442.423	Celastramycin a			Organic oxygen compounds	Organooxygen compounds	Carbonyl compounds	2.27997e+07	3.36813e+07	2.19447e+07	1.45753e+07	2.83961e+07	2.14416e+07	2.92305e+07	1.83054e+07	1.52175e+07	3.01294e+07	2.18633e+07	32985653
M597T33	596.526	33.2464	Cer[ns] d34:1			Lipids and lipid-like molecules	Sphingolipids	Ceramides	1067797	1.2099e+06	1.21573e+06	1.90058e+06	1.92653e+06	1.55315e+06	1.18984e+06	1.48952e+06	1.19034e+06	1.60552e+06	1.66447e+06	1.63386e+06
M393T32_2	393.286	32.2766	Chenodeoxycholate	HMDB0000518	C02528	Lipids and lipid-like molecules	Steroids and steroid derivatives	Bile acids, alcohols and derivatives	3.10352e+07	1.5961e+07	2.27516e+07	2.79695e+07	26870207	2.66487e+07	3.16453e+07	3.42158e+07	2.2478e+07	2.76156e+07	27035902	1.88555e+07
M304T648	304.085	648.247	Chlorambucil	HMDB0014436	C06900	Organic nitrogen compounds	Organonitrogen compounds	Nitrogen mustard compounds	1.83171e+06	1.30626e+06	1.87893e+06	1.78833e+06	2.09718e+06	1.9592e+06	1.93708e+06	1.86646e+06	1.88262e+06	1.82831e+06	2.08139e+06	2.02659e+06
M405T386_1	405.024	386.33	Chloramphenicol succinate		C11727	Benzenoids	Benzene and substituted derivatives	Nitrobenzenes	3.77543e+06	4.1101e+06	4.05925e+06	1.7899e+06	2.42327e+06	2.42948e+06	2.51438e+06	2.62002e+06	2.66201e+06	2.47374e+06	2.53375e+06	3.4972e+06
M736T21	736.139	20.76	Chlorazol black e			Benzenoids	Benzene and substituted derivatives	Biphenyls and derivatives	45909.1	176144	211421	133925	51028.1	89264.1	102094	400927	142704	50524.3	135991	89599.1
M505T218	505.201	218.261	Chlorhexidine	HMDB0015016	C06902	Benzenoids	Benzene and substituted derivatives	Halobenzenes	7716	1.20245e+06	1378795	549831	869702	704921	673454	758574	752518	747985	593740	737277
M170T286_1	169.985	286.458	Chlorzoxazone	HMDB0014500	C07931	Organoheterocyclic compounds	Benzoxazoles	Benzoxazolones	5.37269e+06	5.86773e+06	5.66055e+06	3.99443e+06	4.22259e+06	4.3361e+06	6.84378e+06	7.21191e+06	6.98384e+06	6.61761e+06	7.7616e+06	8.25425e+06
M367T34_2	367.321	33.6019	Cholecalciferol	HMDB0000876	C05443	Lipids and lipid-like molecules	Steroids and steroid derivatives	Vitamin D and derivatives	6.67596e+06	7.57866e+06	7.3196e+06	6.74959e+06	6.12971e+06	6.93403e+06	7.49153e+06	6.56955e+06	7.23096e+06	8.27227e+06	7.07473e+06	6.66921e+06
M465T24	465.305	24.3316	Cholesteryl sulfate	HMDB0000653	C18043	Lipids and lipid-like molecules	Steroids and steroid derivatives	Cholestane steroids	9.49285e+06	9.57367e+06	9719446	9.20644e+06	9.65789e+06	9.78454e+06	9.31921e+06	8.36549e+06	8.33234e+06	9.47396e+06	1.05328e+07	9.5291e+06
M407T217	407.281	217.494	Cholic acid	HMDB0000619	C00695	Lipids and lipid-like molecules	Steroids and steroid derivatives	Bile acids, alcohols and derivatives	3.6685e+07	100700	3.45763e+07	1.38273e+07	1.30493e+07	1.6533e+07	1.11196e+07	1.21898e+07	1.13043e+07	1.38536e+07	1.34052e+07	1.46153e+07
M104T260_5	104.107	259.547	Choline	HMDB0000097	C00114	Organic nitrogen compounds	Organonitrogen compounds	Quaternary ammonium salts	1252383369	1205186368	1661212616	1120059784	1128387879	1153944532	1193093570	1224570222	1610805888	1198171091	1877990688	1140805548
M375T300_2	375.099	300.473	Chrysosplenetin		C10030	Phenylpropanoids and polyketides	Flavonoids	O-methylated flavonoids	5.66362e+06	6.67337e+06	5.35852e+06	4.37086e+06	8.67109e+06	5.19647e+06	7.5705e+06	8.49301e+06	8.51374e+06	6.3782e+06	5.66528e+06	8.5037e+06
M262T552	262.051	551.707	Cidofovir	HMDB0014513	C06909	Organoheterocyclic compounds	Diazines	Pyrimidines and pyrimidine derivatives	916911	1.09435e+06	1.44253e+06	729873	714012	649696	1.26465e+06	1.13277e+06	1.09513e+06	774739	1.78949e+06	1.03089e+06
M617T313	617.363	313.135	Cimicifugoside h 2			Lipids and lipid-like molecules	Steroids and steroid derivatives	Cycloartanols and derivatives	913497	358132	1.94495e+06	197845	775776	291249	388310	814135	1.86677e+06	367787	1.13285e+06	326148
M295T32	295.202	31.5845	Cinchonidine		C11379				3.78611e+06	3.05939e+06	4.21096e+06	3.9093e+06	1.9594e+06	4.91841e+06	4.6764e+06	3.24867e+06	3.89419e+06	4.57969e+06	4.43938e+06	4.45975e+06
M443T125	443.233	124.582	Cinobufagin		C16931	Lipids and lipid-like molecules	Steroids and steroid derivatives	Steroid lactones	43403871	182337474	8.36896e+07	4.06938e+07	2.36149e+07	4.25591e+07	1.51515e+07	170138096	1.84928e+07	3.16906e+07	7.86795e+07	4.89861e+07
M141T334_3	141.017	333.757	Cis,cis-muconic acid	HMDB0006331	C02480	Lipids and lipid-like molecules	Fatty Acyls	Fatty acids and conjugates	1688815007	1658605851	1803426155	1372809007	2333350890	1470229316	2505701430	2968647419	3042011040	2164730839	1602276664	2172336613
M327T37	327.233	36.5297	Cis-4,7,10,13,16,19-docosahexaenoic acid	HMDB0002183	C06429	Lipids and lipid-like molecules	Fatty Acyls	Fatty acids and conjugates	5.34326e+07	5.65348e+07	5.94966e+07	5.06224e+07	6.4692e+07	3.53668e+07	4.15069e+07	6.39651e+07	5.63552e+07	5.10744e+07	5.60826e+07	5.25297e+07
M111T479	111.009	479.222	Cis-aconitate	HMDB0000072	C00417	Organic acids and derivatives	Carboxylic acids and derivatives	Tricarboxylic acids and derivatives	3.14821e+06	3.2089e+06	3.37469e+06	1.44852e+06	1.40335e+06	2.08672e+06	1.4885e+06	2.38988e+06	1.83177e+06	3.24788e+06	2.54735e+06	1.43242e+06
M165T53	165.114	52.9853	Cis-jasmone	HMDB0035601	C08490	Organic oxygen compounds	Organooxygen compounds	Carbonyl compounds	1.08467e+07	11283988	12214491	1.05685e+07	1.03156e+07	1.03434e+07	1.21969e+07	1.21728e+07	1.1566e+07	1.06974e+07	1.0593e+07	1.06881e+07
M191T525	191.02	524.549	Citrate	HMDB0000094	C00158	Organic acids and derivatives	Carboxylic acids and derivatives	Tricarboxylic acids and derivatives	242118529	174194994	181079578	118815191	256119188	127245854	123216797	9.70936e+07	201890752	115552855	189459567	364382980
M125T455	124.999	455.401	Clomazon		C11095	Benzenoids	Benzene and substituted derivatives	Halobenzenes	16149468	1.69242e+07	1.63977e+07	1.33309e+07	1.82057e+07	1.6001e+07	2.08635e+07	2.29435e+07	2.26889e+07	1.8457e+07	1.97136e+07	23431612
M401T389	401.136	389.057	Cnicin		C09362	Lipids and lipid-like molecules	Prenol lipids	Terpene lactones	679381	542299	532228	467743	1.18423e+06	814682	1.09667e+06	962396	1.16819e+06	529637	590680	391830
M304T434	304.162	433.507	Cocaine	HMDB0015043	C01416	Benzenoids	Benzene and substituted derivatives	Benzoic acids and derivatives	4.76019e+06	8.13421e+06	9.93342e+06	2.05542e+06	5.38783e+06	3.07006e+06	6.02449e+06	1.03213e+07	1.11803e+07	5.38897e+06	2.99796e+06	7.16068e+06
M343T164	343.296	163.915	Cocamidoprpylbetaine			Organic acids and derivatives	Carboxylic acids and derivatives	Amino acids, peptides, and analogues	1.49986e+06	1.20134e+06	851759	1.68913e+06	592188	1.12069e+06	2.07243e+06	1.00318e+06	936226	1.20548e+06	1.07457e+06	831679
M319T25_2	319.167	24.6694	Coenzyme q2	HMDB0006709	C00399	Lipids and lipid-like molecules	Prenol lipids	Quinone and hydroquinone lipids	340664	257282	355193	473885	389095	431350	570382	21819.1	352583	404872	515985	445463
M124T423_2	124.087	422.59	Convolvamine		C10854	Benzenoids	Benzene and substituted derivatives	Benzoic acids and derivatives	1.00566e+07	1.01858e+07	9.14339e+06	8.85351e+06	9.95594e+06	9.74216e+06	9.76073e+06	9.54305e+06	9.73202e+06	8.88481e+06	7.518e+06	9.20204e+06
M655T469	655.292	469.103	Coproporphyrin I	HMDB0000643	C05769	Organoheterocyclic compounds	Tetrapyrroles and derivatives	Porphyrins	85430.9	87240	137112	40336.2	123738	38092.6	130564	192346	406219	102065	115710	85830.5
M316T436	316.053	435.817	Corilagin	HMDB0031457	C10219	Phenylpropanoids and polyketides	Tannins	Hydrolyzable tannins	1.33045e+06	1.35917e+06	1.19646e+06	1.33149e+06	1.0779e+06	1.2679e+06	1.18664e+06	1.16486e+06	824845	1.23855e+06	1.24947e+06	1.30546e+06
M347T406	347.204	405.816	Cortexolone	HMDB0000015	C05488	Lipids and lipid-like molecules	Steroids and steroid derivatives	Hydroxysteroids	1.15747e+06	521158	859086	296968	804030	682950	987342	799479	1.16624e+06	700521	1.00648e+06	460152
M132T337	132.077	337.42	Creatine	HMDB0000064	C00300	Organic acids and derivatives	Carboxylic acids and derivatives	Amino acids, peptides, and analogues	33560702	3.85938e+07	3.11542e+07	65085045	3.57695e+07	6.68304e+07	2.81544e+07	3.06674e+07	2.23003e+07	2.80752e+07	5.36252e+07	3.5724e+07
M114T21_1	114.067	21.3661	Creatinine	HMDB0000562	C00791	Organic acids and derivatives	Carboxylic acids and derivatives	Amino acids, peptides, and analogues	5.98135e+06	2.30071e+06	2.4063e+06	2.42293e+06	2.64195e+06	30554	2.26768e+06	2.3884e+06	2.42502e+06	2.42877e+06	2.28209e+06	2.33375e+06
M537T453	537.263	452.671	Cucurbitacin i		C08800	Lipids and lipid-like molecules	Steroids and steroid derivatives	Cucurbitacins	752680	479290	745408	54833.2	172381	93675	299961	161171	1.16444e+06	301317	183965	44336
M149T32	149.096	32.4041	Cuminaldehyde	HMDB0002214	C06577	Lipids and lipid-like molecules	Prenol lipids	Monoterpenoids	9.17197e+06	8.9423e+06	1.02985e+07	7.61063e+06	8.41182e+06	9.62301e+06	2.63182e+07	6.66073e+06	7.23046e+06	7.88964e+06	7.14495e+06	7.46841e+06
M237T32_1	237.185	31.6432	Curcumol	HMDB0038122		Lipids and lipid-like molecules	Prenol lipids	Sesquiterpenoids	3.08475e+06	1.42887e+06	1.48011e+06	1.65307e+06	966183	1.3936e+06	1.02765e+06	1.56065e+06	1.34209e+06	8.17309e+06	1.09397e+06	1.41921e+06
M627T29	627.149	29.2415	Cyanidin 3,5-diglucoside		C08639	Phenylpropanoids and polyketides	Flavonoids	Flavonoid glycosides	1.5155e+06	1.82143e+06	1868770	1.38759e+06	1.50635e+06	1.5343e+06	1.14098e+06	1.29315e+06	1.15592e+06	1.32286e+06	1.25769e+06	1.22623e+06
M540T430	540.055	429.763	Cyclic adenosine diphosphate ribose		C13050	Organic oxygen compounds	Organooxygen compounds	Carbohydrates and carbohydrate conjugates	3.21519e+06	4.32534e+06	3.9774e+06	596549	814051	871468	1.62197e+06	1.98014e+06	1.63065e+06	1.28294e+06	1.52831e+06	1.73379e+06
M246T230_3	246.17	230.011	Cycloheximide		C06685	Organoheterocyclic compounds	Pyridines and derivatives	Hydropyridines	2.51219e+07	2.98061e+07	2.77444e+07	9.31758e+07	9.67464e+07	104946201	143733994	150447522	141045613	104260886	134180460	148113748
M177T82	177.092	81.6028	Cyclohexyl methylphosphonic acid			Organic acids and derivatives	Organic phosphonic acids and derivatives	Phosphonic acid esters	137853	222591	148759	149792	140784	246422	148047	129081	137436	161073	172375	153494
M100T151	100.112	150.518	Cyclohexylamine	HMDB0031404	C00571	Organic nitrogen compounds	Organonitrogen compounds	Cyclohexylamines	212255170	164855175	217573717	203925939	174932858	185183808	230070191	219746866	233590672	204681781	208043194	210207659
M351T684	351.155	684.043	Cyclopentanehexanoic acid, 2-[(2z)-4-carboxy-2-buten-1-yl]-3,5-dihydroxy-.gamma.-oxo-, (1r,2r,3s,5s)-			Lipids and lipid-like molecules	Fatty Acyls	Eicosanoids	599546	1.02746e+06	1.05536e+06	1.11737e+06	1.00631e+06	729261	2.08743e+06	986797	1.01981e+06	1.18133e+06	799796	1.45883e+06
M337T422	337.143	421.872	Cyclopiazonic acid		C03032	Organoheterocyclic compounds	Indoles and derivatives	Indoles	1.64041e+06	1.86102e+06	1.89058e+06	1.53362e+06	1.7866e+06	1.61538e+06	1.60977e+06	1.59632e+06	1.69414e+06	1.60304e+06	1.67022e+06	1.68965e+06
M467T379	467.138	379.231	Cyhalothrin		C10983	Lipids and lipid-like molecules	Fatty Acyls	Fatty acid esters	484559	542658	523754	232640	335696	279322	374423	355707	333948	321653	298706	376067
M292T425	292.114	424.554	Cyproconazole		C18456				502612	635635	710019	393326	666956	489714	593496	663426	736919	497022	652623	756280
M375T426	375.163	425.836	Cys-Pro-Arg			Organic acids and derivatives	Carboxylic acids and derivatives	Amino acids, peptides, and analogues	211063	183469	271846	100242	230741	126783	202579	326765	377104	144173	153730	152121
M168T443	167.997	442.528	Cysteic acid	HMDB0002757	C00506	Organic acids and derivatives	Carboxylic acids and derivatives	Amino acids, peptides, and analogues	248341	315664	237454	136487	288768	332353	247631	232651	228143	197855	195701	309670
M244T234	244.093	233.8	Cytarabine	HMDB0015122	C02961				922902	2.49544e+06	2122635	1.0496e+06	744804	1.09037e+06	1.42579e+06	1.94715e+06	1.6229e+06	1.53297e+06	1.76554e+06	2.09736e+06
M242T372_2	242.079	371.908	Cytidine	HMDB0000089	C00475	Nucleosides, nucleotides, and analogues	Pyrimidine nucleosides		1.0995e+07	1.47079e+07	6.24255e+06	1.84715e+07	1.61867e+07	1.63154e+07	2.40235e+07	2.3614e+07	1.34991e+07	2.21531e+07	8.42134e+06	2.60465e+07
M324T437_1	324.046	437.271	Cytidine 3'-monophosphate		C05822				1.22319e+06	1.90103e+06	1.82851e+06	757659	1.01196e+06	1.1451e+06	807940	1.1394e+06	883964	917760	875262	830799
M489T429_2	489.115	429.336	Cytidine 5'-diphosphocholine	HMDB0001413	C00307	Nucleosides, nucleotides, and analogues	Pyrimidine nucleotides	Pyrimidine ribonucleotides	7.26162e+06	6.19423e+06	8.75798e+06	3.20631e+06	4.58876e+06	4.09302e+06	3.45412e+06	3.34104e+06	5.32537e+06	3.14751e+06	8.01736e+06	4.00995e+06
M322T430	322.045	429.535	Cytidine 5'-monophosphate	HMDB0000095	C00055	Nucleosides, nucleotides, and analogues	Pyrimidine nucleotides	Pyrimidine ribonucleotides	422993	558156	629340	181723	282180	253199	360039	322910	418778	260300	309613	331880
M613T430	613.141	429.976	Cytidine monophosphate n-acetylneuraminic acid	HMDB0001176	C00128	Nucleosides, nucleotides, and analogues	Pyrimidine nucleotides	Pyrimidine nucleotide sugars	605425	920279	934118	256060	374693	316123	342506	418521	405655	346953	380155	436232
M480T447	480.284	446.88	Cytochalasin b		C19954	Alkaloids and derivatives	Cytochalasans	Cytochalasins	287770	73891.1	274760	90221.8	171253	135038	177831	249987	838598	105655	162842	35518.6
M416T419	416.227	419.077	Cytochalasin e						178711	243259	609384	118855	175173	132471	162811	406868	713016	204670	136909	156873
M516T527	516.271	527.028	Cytochalasin h						94435.8	198328	496335	60921.5	303446	135806	215724	504203	717020	237239	202598	136786
M112T195	112.051	194.621	Cytosine	HMDB0000630	C00380	Organoheterocyclic compounds	Diazines	Pyrimidines and pyrimidine derivatives	6.5226e+07	52767969	7.8535e+07	5.36636e+07	5.76271e+07	5.62813e+07	4.26819e+07	29983080	38462850	4.12186e+07	81961986	4.94637e+07
M102T386	102.056	386.232	D-2-aminobutyric acid	HMDB0000452	C02261	Organic acids and derivatives	Carboxylic acids and derivatives	Amino acids, peptides, and analogues	8.57604e+06	1.22626e+07	1.08275e+07	4.48216e+06	6.49775e+06	5.996e+06	5.73226e+06	6.77619e+06	7.0798e+06	5.557e+06	6.68835e+06	7.84618e+06
M167T582	166.984	581.839	D-2-phosphoglyceric acid	HMDB0003391	C00197	Organic oxygen compounds	Organooxygen compounds	Carbohydrates and carbohydrate conjugates	2.9662e+07	2.61666e+07	2.5361e+07	3.05088e+07	3.54209e+07	2.38756e+07	2.67987e+07	2.89119e+07	3.1507e+07	3.57961e+07	2.43982e+07	3.13136e+07
M179T299	179.056	298.56	D-allose	HMDB0001151	C01487	Organic oxygen compounds	Organooxygen compounds	Carbohydrates and carbohydrate conjugates	1.47927e+06	1.75812e+06	1.68626e+06	1.48134e+06	1.94391e+06	1.52716e+06	2.4523e+06	3.08048e+06	3.06119e+06	2.15462e+06	1.91669e+06	2.47612e+06
M132T116	132.049	116.188	D-aspartic acid	HMDB0006483	C00402	Organic acids and derivatives	Carboxylic acids and derivatives	Amino acids, peptides, and analogues	553985	1.97014e+06	1612586	2.66828e+06	1.2194e+06	1.0533e+06	1.0747e+06	2.28871e+06	1.85024e+06	1.32084e+06	1.18718e+06	917694
M363T290_2	363.09	290.347	Daunorubicin	HMDB0014832	C01907				5.30957e+06	9.17744e+06	9.70124e+06	1.02803e+07	1.24482e+07	1.2748e+07	14633535	18236291	2.06998e+07	1.37977e+07	13109406	1.45459e+07
M417T26	417.211	26.4352	Dauricine		C09419	Organoheterocyclic compounds	Isoquinolines and derivatives	Benzylisoquinolines	611098	274484	379030	823960	120670	681879	374034	320707	262973	518469	242182	709550
M202T148	202.217	147.993	Ddao			Organic nitrogen compounds	Organonitrogen compounds	Aminoxides	4.3755e+06	2.56785e+06	3.11853e+06	5.2446e+06	1.25967e+06	2.56543e+06	3.48671e+06	1.73438e+06	5.96897e+06	4.13378e+06	2.59072e+06	1.88402e+06
M371T30_1	371.102	29.6556	Decamethylcyclopentasiloxane			Organometallic compounds	Organometalloid compounds	Organosilicon compounds	1.4358e+06	1.70045e+06	2.43411e+06	4.52188e+06	760374	1.00602e+06	990744	2.38344e+06	991193	1.14394e+06	3.0641e+06	2.60681e+06
M157T129	157.17	129.219	Decanal	HMDB0011623	C12307	Organic oxygen compounds	Organooxygen compounds	Carbonyl compounds	1.47637e+06	1.96012e+06	1.52995e+06	1.47551e+06	3.29185e+06	1.7252e+06	2.25332e+06	2.55361e+06	1.92132e+06	1.62136e+06	1.15034e+06	1.45324e+06
M446T300	446.136	300.481	Dehydroaripiprazole			Organoheterocyclic compounds	Diazinanes	Piperazines	2.30714e+06	2.17324e+06	2.26232e+06	1.55407e+06	4.54416e+06	2.0451e+06	3.62928e+06	4.41061e+06	4.67811e+06	2.72269e+06	2.17293e+06	4.05717e+06
M508T471	507.967	471.156	Deltamethrin		C10985	Lipids and lipid-like molecules	Fatty Acyls	Fatty acid esters	121070	94916.2	229039	64783.3	91815.3	67583.9	98815.4	318797	434496	89484.2	113195	63191.4
M281T576_2	281.049	575.75	Demeton s		C18978				2.14657e+07	1.87975e+07	1.73095e+07	2.478e+07	1.65989e+07	2.58529e+07	1.93123e+07	2.03772e+07	2.05722e+07	2.04822e+07	1.79834e+07	2.55326e+07
M391T158_1	391.286	158.1	Deoxycholic acid	HMDB0000626	C04483	Lipids and lipid-like molecules	Steroids and steroid derivatives	Bile acids, alcohols and derivatives	156440	371087	151989	1.30134e+07	1.15113e+07	1.71261e+07	1.14562e+07	1.20498e+07	9.49206e+06	1.15517e+07	1.02285e+07	1.35181e+07
M266T314	266.082	314.293	Deoxyguanosine	HMDB0000085	C00330	Nucleosides, nucleotides, and analogues	Purine nucleosides	Purine 2'-deoxyribonucleosides	1.32386e+06	1.19933e+06	1.17535e+06	882697	1.71799e+06	918289	2.10096e+06	2.52928e+06	2.46413e+06	1.78804e+06	978560	2.02935e+06
M251T178_2	251.079	177.675	Deoxyinosine	HMDB0000071	C05512	Nucleosides, nucleotides, and analogues	Purine nucleosides	Purine 2'-deoxyribonucleosides	4.23951e+06	7.07188e+06	4.9289e+06	4.71454e+06	2.76296e+06	5.14981e+06	3.58602e+06	4.19624e+06	2.83476e+06	3.47866e+06	4.48735e+06	5.45219e+06
M321T400	321.05	399.731	Deoxythymidine 5'-phosphate (dTMP)	HMDB0001227	C00364	Nucleosides, nucleotides, and analogues	Pyrimidine nucleotides	Pyrimidine deoxyribonucleotides	469435	320377	559941	221552	344911	205850	255136	270811	385274	287798	400753	333314
M187T53	187.094	53.2153	Deoxyvasicinone		C10659	Organoheterocyclic compounds	Diazanaphthalenes	Benzodiazines	2.05313e+06	2.10026e+06	3.28677e+06	2.21235e+06	1.69218e+06	2.53447e+06	3.07554e+06	3.10552e+06	2.73928e+06	2.55365e+06	2.55241e+06	2.85552e+06
M618T386	618.019	385.616	Desethylamiodarone	HMDB0060528		Organic oxygen compounds	Organooxygen compounds	Carbonyl compounds	133517	243330	186590	57123.1	76644.6	75079	56793.5	83606.7	73805	73602.4	59131.1	123487
M311T143	311.258	143.189	Desogestrel	HMDB0014449	C07629	Lipids and lipid-like molecules	Steroids and steroid derivatives	Estrane steroids	4.17349e+06	4.08506e+06	4.57453e+06	6.58163e+06	4.35864e+06	5.32254e+06	7.43019e+06	6.36079e+06	5.40305e+06	6.58954e+06	4.99187e+06	5.61627e+06
M101T389	101.025	389.462	D-galacturonic acid	HMDB0002545	C00333	Organic oxygen compounds	Organooxygen compounds	Carbohydrates and carbohydrate conjugates	2.39319e+06	3.5999e+06	4.25438e+06	3.73351e+06	4.2758e+06	4.29941e+06	4.52795e+06	5.18617e+06	4.88308e+06	3.91916e+06	3.86962e+06	4.30341e+06
M219T213	219.036	212.868	D-gluconate	HMDB0000625	C00257	Organic oxygen compounds	Organooxygen compounds	Carbohydrates and carbohydrate conjugates	1.63551e+06	2.30622e+06	1.94184e+06	1.77799e+06	1.1808e+06	2.13495e+06	1.77974e+06	1.49774e+06	1.17388e+06	1.67025e+06	1.82111e+06	1.79782e+06
M305T475	305.001	475.459	D-glucose 6-phosphate		C00092	Organic oxygen compounds	Organooxygen compounds	Carbohydrates and carbohydrate conjugates	318888	394028	354875	458045	363710	377186	501065	318642	572738	403072	522342	388729
M130T387	130.05	386.813	D-glutamine	HMDB0003423	C00064	Organic acids and derivatives	Carboxylic acids and derivatives	Amino acids, peptides, and analogues	1.50807e+07	2.32304e+07	1.91874e+07	9.05255e+06	2.38689e+07	1.26307e+07	1.16356e+07	1.41223e+07	1.41829e+07	2.27531e+07	2.16488e+07	1.4923e+07
M87T360_1	87.0442	359.809	Diacetyl	HMDB0003407	C00741	Organic oxygen compounds	Organooxygen compounds	Carbonyl compounds	725637	774816	711451	832021	801718	834508	1.11042e+06	1.01919e+06	942493	867578	848207	908780
M261T23	261.131	23.247	Diaveridine			Benzenoids	Benzene and substituted derivatives	Methoxybenzenes	389110	494500	405395	401534	371209	389563	354076	337500	432406	420098	835420	492546
M259T30	259.169	29.5548	Dibutyl adipate		C14253	Lipids and lipid-like molecules	Fatty Acyls	Fatty acid esters	2.87664e+06	3.10044e+06	2.16823e+06	2.31282e+06	1.78327e+06	3.15628e+06	2.70939e+06	2.37089e+06	2.64692e+06	2.43978e+06	2.4595e+06	2.92907e+06
M210T252_1	210.05	252.434	Dichlormid		C18782	Organic acids and derivatives	Carboxylic acids and derivatives	Carboxylic acid derivatives	7.64965e+06	7.6051e+06	9.36121e+06	5.0253e+06	6.77186e+06	4.25926e+06	6.99086e+06	1.01841e+07	9.80967e+06	5.96452e+06	6.67873e+06	6.508e+06
M200T370	200.092	370.059	Dictamine		C10660	Organoheterocyclic compounds	Quinolines and derivatives	Furanoquinolines	811040	761783	807137	845271	1.21752e+06	708268	805693	584021	660761	684843	1.147e+06	726061
M588T153	588.364	153.157	Didecanoyl-glycerophosphocholine			Lipids and lipid-like molecules	Glycerophospholipids	Glycerophosphocholines	1.35941e+06	831152	1.78767e+06	2.74401e+06	2.70868e+06	3.09152e+06	2.71859e+06	2.1092e+06	2.46279e+06	2.65601e+06	2.7556e+06	2.86953e+06
M106T294	106.086	294.045	Diethanolamine	HMDB0004437	C06772	Organic nitrogen compounds	Organonitrogen compounds	Amines	2.49369e+06	2.45051e+06	2.26824e+06	3.15354e+06	1.89201e+06	2.49653e+06	2.46599e+06	2.22585e+06	2.61782e+06	2.82675e+06	2.51836e+06	2.81684e+06
M333T426	333.06	425.926	Diflufenzopyr			Benzenoids	Benzene and substituted derivatives	N-phenylureas	1.41931e+07	1.86763e+07	1.71603e+07	9.398e+06	15295503	1.29817e+07	1.52175e+07	1.74051e+07	1.82939e+07	1.36071e+07	1.18246e+07	16721892
M309T356	309.04	355.5	Digalacturonic acid		C02273				789996	835592	767564	825803	728651	846772	725707	657769	529165	842554	816360	869747
M203T30	203.107	29.6726	Dinotefuran		C18509	Organic nitrogen compounds	Organonitrogen compounds	Guanidines	336925	240532	515377	526592	396730	245330	331157	380667	276833	362926	472617	290749
M242T98	242.284	97.6284	Dioctylamine			Organic nitrogen compounds	Organonitrogen compounds	Amines	2.42771e+06	1.91568e+06	2.12946e+06	3.43926e+06	5.22141e+06	3.19138e+06	4.74418e+06	6.62234e+06	3.32851e+06	3.89647e+06	3.84436e+06	3.6819e+06
M453T219	453.259	218.645	Diphenoxylate	HMDB0015213	C07872	Benzenoids	Benzene and substituted derivatives	Diphenylacetonitriles	1.74957e+06	34816.2	28941.2	683657	430992	789178	425471	419208	315407	555977	597224	545143
M340T123	340.259	123.204	Disopyramide	HMDB0014425	C06965	Organoheterocyclic compounds	Pyridines and derivatives	Pheniramines	3.71383e+06	4.42849e+06	4.18847e+06	3.57341e+06	2.79923e+06	5.26426e+06	6.75309e+06	5.2353e+06	3.67626e+06	3.72461e+06	3.00307e+06	3.80346e+06
M160T371	160.133	370.793	Dl-2-aminocaprylic acid	HMDB0000991		Organic acids and derivatives	Carboxylic acids and derivatives	Amino acids, peptides, and analogues	1.65188e+06	2.03223e+06	1.8236e+06	4.94429e+07	5.59845e+07	5.76674e+07	5.91843e+07	6.51362e+07	5.66494e+07	4.12721e+07	5.65701e+07	6.44997e+07
M185T496	184.986	495.728	DL-2-Phosphoglycerate	HMDB0003391	C00631	Organic oxygen compounds	Organooxygen compounds	Carbohydrates and carbohydrate conjugates	535630	1.24389e+06	1.18979e+06	953783	1.42471e+06	1.61279e+06	2.4475e+06	4.01703e+06	3.99284e+06	2.36418e+06	1.09392e+06	1.00711e+06
M341T389	341.109	389.497	D-lactose	HMDB0000186	C00243	Organic oxygen compounds	Organooxygen compounds	Carbohydrates and carbohydrate conjugates	1.132e+06	1.73409e+06	1.84748e+06	2.26396e+06	2.65099e+06	2.93619e+06	3.21085e+06	3.53626e+06	3.73342e+06	2.5618e+06	2.66845e+06	2.62199e+06
M175T514	175.119	514	DL-arginine		C00792	Organic acids and derivatives	Carboxylic acids and derivatives	Amino acids, peptides, and analogues	2.80654e+07	5.03736e+07	4.61419e+07	6.7497e+06	27993655	4.17708e+07	44808198	141534010	8.47972e+07	8.4084e+06	3.66231e+07	4.23604e+07
M105T334_1	104.992	333.99	DL-cysteine	HMDB0000574	C00097	Organic acids and derivatives	Carboxylic acids and derivatives	Amino acids, peptides, and analogues	528928716	527945921	583395254	411021147	744015787	442472003	831700772	1009630416	980011721	759058039	505397085	738340546
M146T386_2	146.046	386.313	DL-Glutamic acid	HMDB0060475	C00025	Organic acids and derivatives	Carboxylic acids and derivatives	Amino acids, peptides, and analogues	6.99339e+07	9.84103e+07	8.9536e+07	3.56715e+07	4.97164e+07	4.80381e+07	4.47423e+07	5.28739e+07	5.59888e+07	4.28085e+07	5.20774e+07	6.23642e+07
M145T363	145.062	362.692	DL-glutamine		C00303	Organic acids and derivatives	Carboxylic acids and derivatives	Amino acids, peptides, and analogues	4.56378e+06	5.59877e+06	4.09015e+06	2.19384e+06	4.93456e+06	4.89729e+06	5.00717e+06	6.6929e+06	5.85799e+06	4.93548e+06	3.22618e+06	4.83628e+06
M89T225_1	89.0244	225.052	Dl-lactate		C01432	Organic acids and derivatives	Hydroxy acids and derivatives	Alpha hydroxy acids and derivatives	712790338	472096635	1157542984	316055968	507253406	350020604	323724720	332248734	803629599	285231451	919558139	333762332
M229T193	229.156	192.783	Dl-Leu-dl-Val	HMDB0028942		Organic acids and derivatives	Carboxylic acids and derivatives	Amino acids, peptides, and analogues	2.57387e+06	4.81209e+06	6.21363e+06	2.13096e+06	4.23123e+06	2.4647e+06	7.14586e+06	1.59485e+07	1.59448e+07	3.44299e+06	1.9623e+06	6.53529e+06
M133T440	133.014	440.271	Dl-malic acid	HMDB0000744	C00497	Organic acids and derivatives	Hydroxy acids and derivatives	Beta hydroxy acids and derivatives	2.01909e+06	2.86343e+06	1.67593e+06	2.16674e+06	2.88067e+06	3.11005e+06	1.8683e+06	1.80152e+06	1.71453e+06	2.33526e+06	2.03196e+06	1.93764e+06
M116T301	116.071	301.2	DL-proline	HMDB0000162	C00148	Organic acids and derivatives	Carboxylic acids and derivatives	Amino acids, peptides, and analogues	141239476	154757372	195206438	9.67626e+07	172460131	127652533	149936835	181935679	235321436	124198225	143072663	154337203
M104T372	104.035	371.928	DL-serine	HMDB0062263	C00065	Organic acids and derivatives	Carboxylic acids and derivatives	Amino acids, peptides, and analogues	1.88169e+07	8.86903e+06	20147079	6.70381e+06	1.05696e+07	8.56156e+06	8.3165e+06	9.17623e+06	2.56107e+07	8.6898e+06	1.82979e+07	8.70813e+06
M188T248	188.071	247.724	DL-tryptophan	HMDB0030396	C00078	Organoheterocyclic compounds	Indoles and derivatives	Indolyl carboxylic acids and derivatives	4.06791e+06	4.40981e+06	5.37859e+06	2.18008e+06	4.14431e+06	2.91854e+06	4.27042e+06	5.82943e+06	7.08238e+06	3.64426e+06	4.08965e+06	4.13839e+06
M118T647	118.086	646.624	DL-valine	HMDB0000883	C00183	Organic acids and derivatives	Carboxylic acids and derivatives	Amino acids, peptides, and analogues	9.33143e+06	10926486	2.73113e+07	10526240	1.13784e+07	1.08219e+07	1.07481e+07	1.04938e+07	1.01818e+07	2.8783e+06	22728753	1.06919e+07
M162T121	162.066	120.587	D-mannosamine		C03570	Organic oxygen compounds	Organooxygen compounds	Carbohydrates and carbohydrate conjugates	6.46861e+06	4.46385e+06	5.41578e+06	4.22391e+06	4.8522e+06	1.12047e+07	10494061	1.66081e+07	14106404	1.39852e+07	14417118	1.72635e+06
M217T36	217.01	35.9824	D-Mannose	HMDB0000169	C00159	Organic oxygen compounds	Organooxygen compounds	Carbohydrates and carbohydrate conjugates	1.32212e+06	1.17539e+06	699108	1.09493e+06	1.35252e+06	947397	1.29246e+06	1.28061e+06	270728	1.09353e+06	961336	996388
M259T476	259.023	476.023	D-mannose 6-phosphate	HMDB0001078	C00275	Organic oxygen compounds	Organooxygen compounds	Carbohydrates and carbohydrate conjugates	2.92286e+06	4.31189e+06	3.83101e+06	2.97626e+06	4.45372e+06	2.89945e+06	4.96251e+06	5.06456e+06	6.80546e+06	4.21921e+06	4.57549e+06	4.30856e+06
M403T397	402.971	396.892	D-myo-inositol-1,3,5-triphosphate			Organic oxygen compounds	Organooxygen compounds	Alcohols and polyols	453302	761384	621067	688142	752631	860455	873417	1.01885e+06	691092	858627	518141	831257
M421T397	420.957	396.892	D-myo-inositol-1,4,5-triphosphate	HMDB0001498	C01245	Organic oxygen compounds	Organooxygen compounds	Alcohols and polyols	657645	1.26227e+06	923557	1.11343e+06	1.19658e+06	1.24274e+06	1.29824e+06	1.61098e+06	1.11967e+06	1.35109e+06	712234	1.23128e+06
M249T222	248.974	221.512	D-myo-inositol-3,4,5,6-tetraphosphate	HMDB0003848	C04520	Organic oxygen compounds	Organooxygen compounds	Alcohols and polyols	2.55105e+06	2.60897e+06	2.63369e+06	2.58309e+06	2.566e+06	2.57949e+06	2.43698e+06	2.60068e+06	2.4347e+06	2.72084e+06	2.56646e+06	2.42166e+06
M376T33	376.319	32.9808	Docosatetraenoyl ethanolamide	HMDB0013626		Organic nitrogen compounds	Organonitrogen compounds	Amines	2310970	1.90647e+06	2.62887e+06	1.67459e+06	2.03659e+06	2.15142e+06	1.16191e+06	1.82758e+06	1.76297e+06	1.3446e+06	1.89679e+06	2.62776e+06
M333T36	333.28	36.2664	Docosatrienoic acid	HMDB0002823		Lipids and lipid-like molecules	Fatty Acyls	Fatty acids and conjugates	4.47626e+06	3.76326e+06	4.31822e+06	5.16784e+06	5.30884e+06	3.90825e+06	4.8783e+06	4.78717e+06	3.15653e+06	3.90591e+06	4.83302e+06	3.75366e+06
M195T33	195.139	33.2292	Dodeca-2(e),4(e)-dienoic acid			Lipids and lipid-like molecules	Fatty Acyls	Fatty acids and conjugates	4.87983e+06	5.34097e+06	5.56594e+06	7.65232e+06	5.0097e+06	7.54464e+06	8.8443e+06	8.13355e+06	7.34595e+06	7.18565e+06	6.93927e+06	8.46266e+06
M211T36	211.134	35.9592	Dodecanedioic acid	HMDB0000623	C02678	Lipids and lipid-like molecules	Fatty Acyls	Fatty acids and conjugates	433030	1.4707e+06	793666	400855	656665	431586	821383	1.90773e+06	499334	342587	356990	418090
M199T36	199.17	36.4909	Dodecanoic acid	HMDB0000638	C02679	Lipids and lipid-like molecules	Fatty Acyls	Fatty acids and conjugates	5.03313e+06	9.26051e+06	8.3101e+06	3.66177e+07	4.08829e+07	32629455	3.36252e+07	3.42987e+07	3.71843e+07	3.3551e+07	3.6738e+07	2.80502e+07
M198T33	198.185	32.6194	Dodecanoic acid, 12-[[(cyclohexylamino)carbonyl]amino]-			Lipids and lipid-like molecules	Fatty Acyls	Fatty acids and conjugates	1.88748e+07	17131834	1.02852e+07	1.26718e+07	7.85278e+06	1.15701e+07	8.19422e+06	9.01822e+06	1.36873e+07	4.55634e+06	1.01097e+07	1.07312e+07
M152T183	152.002	183.368	Dopamine	HMDB0000073	C03758	Benzenoids	Phenols	Benzenediols	550290	575424	499478	416914	945827	470726	1.04374e+06	1.11259e+06	1.18547e+06	945311	423726	939734
M131T378	131.083	378.349	D-ornithine	HMDB0003374	C00515	Organic acids and derivatives	Carboxylic acids and derivatives	Amino acids, peptides, and analogues	3.53807e+07	3.63021e+07	5.18584e+07	1.89791e+07	3.08413e+07	2.45501e+07	2.96463e+07	39025194	5.34188e+07	2.84772e+07	3.21454e+07	30061583
M379T300	379.064	300.07	Doxorubicin	HMDB0015132	C01661				1.71168e+06	2.19701e+06	3.71049e+06	3.86158e+06	9.55788e+06	5.24724e+06	1.06505e+07	1.11916e+07	1.46838e+07	4.80645e+06	3.24539e+06	7.77798e+06
M114T302	114.056	301.538	D-proline	HMDB0003411	C00763	Organic acids and derivatives	Carboxylic acids and derivatives	"Amino acids, peptides, and analogues"	9.04777e+06	10969802	13816233	6.5454e+06	9.20413e+06	7.62243e+06	8.03238e+06	9.58816e+06	1.19536e+07	7.21584e+06	9.0674e+06	8.26057e+06
M229T425	229.012	425.326	D-ribose 5-phosphate		C00117	Organic oxygen compounds	Organooxygen compounds	Carbohydrates and carbohydrate conjugates	4.25589e+06	5.19831e+06	6.97482e+06	2.35013e+06	7.10352e+06	4.09087e+06	7.01038e+06	8.69241e+06	9.00443e+06	5.63336e+06	5.3644e+06	5.72951e+06
M229T456	229.012	456.036	D-ribulose 5-phosphate	HMDB0001548	C00199	Organic oxygen compounds	Organooxygen compounds	Carbohydrates and carbohydrate conjugates	1.30213e+06	2.45546e+06	1.2613e+06	1.01656e+06	2.78722e+06	1.5918e+06	2.70665e+06	3.32815e+06	1.93105e+06	1.26232e+06	2.7589e+06	3.15257e+06
M383T299	383.065	298.565	D-saccharic acid 1,4-lactone	HMDB0041862		Organoheterocyclic compounds	Lactones	Gamma butyrolactones	228216	393479	346011	120925	366634	141898	621670	925541	1.0079e+06	378302	238658	652123
M181T291	181.072	291.297	D-Sorbitol	HMDB0000247	C00794	Organic oxygen compounds	Organooxygen compounds	Carbohydrates and carbohydrate conjugates	5.62077e+06	6.69528e+06	6.55407e+06	3.40217e+06	3.26018e+06	2.8032e+06	4.11374e+06	3.45769e+06	3.96084e+06	3.54818e+06	2.67943e+06	3.39119e+06
M161T356	161.057	355.502	D-turanose	HMDB0011740	C19636	Lipids and lipid-like molecules	Fatty Acyls	Fatty acyl glycosides	448439	573934	1.08748e+06	377372	565017	544955	521867	654523	761280	528786	533672	493690
M113T299	113.024	298.74	D-xylose	HMDB0060254	C00181	Organic oxygen compounds	Organooxygen compounds	Carbohydrates and carbohydrate conjugates	5.00052e+06	3.98163e+06	3.93337e+06	3.24298e+06	3.86321e+06	3.84232e+06	5.40537e+06	6.18328e+06	9.83972e+06	4.424e+06	4.43787e+06	5.17303e+06
M398T32	398.242	32.2869	Echimidine		C10299				1.19703e+07	7.0868e+06	9.00745e+06	1.16262e+07	1.13701e+07	1.13589e+07	1.0773e+07	1.34116e+07	9.15523e+06	1.02725e+07	9.76786e+06	7.91791e+06
M383T387	383.029	386.953	Econazole	HMDB0015259	C08069	Benzenoids	Benzene and substituted derivatives	Benzylethers	2.57638e+06	3.50954e+06	3.35431e+06	1.49229e+06	2.21783e+06	1.93184e+06	2.18286e+06	2.53167e+06	2.52334e+06	1.66163e+06	1.95376e+06	2.49397e+06
M309T37	309.28	36.6141	Eicosenoic acid		C16526	Lipids and lipid-like molecules	Fatty Acyls	Fatty acids and conjugates	4.17582e+07	6.10102e+07	5.78196e+07	7.71688e+07	6.24907e+07	7.93459e+07	7.51761e+07	7.98321e+07	7.65831e+07	7.20173e+07	5.20866e+07	7.04389e+07
M293T24	293.179	23.7958	Embelin		C10342	Organic oxygen compounds	Organooxygen compounds	Carbonyl compounds	6.58436e+06	1.18272e+07	5.47154e+06	9.6938e+06	2.64238e+06	6.5747e+06	7.82785e+06	5.10814e+06	4.85108e+06	6.61004e+06	6.15887e+06	5.62981e+06
M148T260_1	148.114	259.554	Ephedrine	HMDB0015451	C01575	Benzenoids	Benzene and substituted derivatives	Phenylpropanes	3.0015e+06	2.63141e+06	3.42177e+06	2.70034e+06	2.44967e+06	2.60316e+06	2.79691e+06	2.85703e+06	3.17745e+06	2.70147e+06	3.5953e+06	2.6601e+06
M330T389	330.098	389.22	Epoxiconazole		C11229				1.04399e+06	3.17608e+06	1.26755e+06	1.09143e+06	1.6398e+06	1.24931e+06	1.27427e+06	1.99018e+06	3.42511e+06	1.87208e+06	1.22508e+06	1.30146e+06
M305T414	304.9	413.719	Epoxytricarballylic acid			Organic acids and derivatives	Carboxylic acids and derivatives	Tricarboxylic acids and derivatives	2.04141e+06	1.73831e+06	2.06892e+06	1.97133e+06	3.99331e+06	1.76301e+06	1.99783e+06	1.49442e+06	3.06127e+06	1.89884e+06	2.0816e+06	1.79161e+06
M289T476	289.072	475.868	Eriodictyol	HMDB0126018	C05631	Phenylpropanoids and polyketides	Flavonoids	Flavans	2.54765e+06	2.44719e+06	2267684	1.46998e+06	2.67194e+06	2.71189e+06	2.46591e+06	2.33991e+06	2.69945e+06	2.55406e+06	2.4795e+06	3.00971e+06
M338T32_2	338.342	32.2899	Erucamide			Lipids and lipid-like molecules	Fatty Acyls	Fatty amides	124866257	4.72896e+07	9.13085e+07	8.28799e+07	9.16721e+07	9.6473e+07	3.16912e+07	3.43494e+07	5.71905e+07	2.76623e+07	121430740	115299418
M337T36	337.312	36.4936	Erucic acid	HMDB0002068	C08316	Lipids and lipid-like molecules	Fatty Acyls	Fatty acids and conjugates	1.32163e+07	9.89789e+06	1.19085e+07	14071917	1.5714e+07	1.74784e+07	1.27947e+07	1.3085e+07	1.20882e+07	1.5213e+07	1.1677e+07	1.27761e+07
M102T282	102.091	281.617	Ethanol, 2-[[3-(2,3-dichlorophenoxy)propyl]amino]-			Benzenoids	Benzene and substituted derivatives	Halobenzenes	4.77053e+07	5.43313e+07	5.23038e+07	5.64014e+07	48773299	5.78271e+07	6.65279e+07	6.26775e+07	5.19455e+07	6.68221e+07	64212568	7.50407e+07
M399T397	398.976	396.883	Ethiprole		C18552	Organoheterocyclic compounds	Azoles	Pyrazoles	1.24309e+06	2.28444e+06	1.87427e+06	2.01235e+06	2.10472e+06	2.34763e+06	2.3013e+06	2.82131e+06	1.98405e+06	2.36441e+06	1429381	2.30664e+06
M226T374	226.084	373.581	Ethyl 3-indoleacetate		C10884	Organoheterocyclic compounds	Indoles and derivatives	Indolyl carboxylic acids and derivatives	7441879	1.0033e+07	3.57842e+06	1.69522e+07	1.23266e+07	1.45742e+07	1.85655e+07	1.60251e+07	8.08224e+06	1.98736e+07	5.67597e+06	2.16843e+07
M227T145	227.202	145.466	Ethyl laurate	HMDB0033788	C05437	Lipids and lipid-like molecules	Fatty Acyls	Fatty acid esters	2.80163e+06	3.24019e+06	3.69033e+06	3.91653e+06	8.45252e+06	7.93519e+06	4.32978e+06	3.84494e+06	5.32499e+06	7.91097e+06	5.39156e+06	3.68384e+06
M291T442	291.084	441.977	Ethylenediaminetetraacetic acid	HMDB0015109	C00284	Organic acids and derivatives	Carboxylic acids and derivatives	Tetracarboxylic acids and derivatives	496953	2.02186e+06	1.47897e+06	131154	7.88873e+06	534424	5.91097e+06	1.81861e+07	2.65306e+07	1.09536e+06	723909	1.76096e+06
M336T192	336.153	192.491	Ethylmorphine	HMDB0015509	C07537	Alkaloids and derivatives	Morphinans		348741	300619	416423	382464	518353	518943	439188	376459	411056	342887	442042	412931
M205T456	204.989	456.017	Etidronic acid	HMDB0015210	C07736	Organic acids and derivatives	Organic phosphonic acids and derivatives	Bisphosphonates	1.04587e+06	1.20715e+06	1.13519e+06	1.2137e+06	869411	1.32807e+06	934317	914277	810413	1.13858e+06	1.26743e+06	1.35671e+06
M242T32	242.176	32.2454	Etodolac	HMDB0014887	C06991	Organoheterocyclic compounds	Indoles and derivatives	Indolyl carboxylic acids and derivatives	7.87519e+06	7.00151e+06	4.64474e+06	4.87517e+06	3.43945e+06	4.36269e+06	2.6975e+06	2.79208e+06	6.02326e+06	1.19652e+06	3.81325e+06	4.18433e+06
M95T33_2	95.0856	32.8783	Exo-norborneol			Lipids and lipid-like molecules	Prenol lipids	Monoterpenoids	2.07064e+07	1.96418e+07	1.29535e+07	1.56055e+07	9.75456e+06	1.39197e+07	1.35276e+07	1.09169e+07	1.46598e+07	8.55993e+06	1.33517e+07	1.42974e+07
M258T47	258.242	46.5588	Fa 16:0-d3			Lipids and lipid-like molecules	Fatty Acyls	Fatty acids and conjugates	212560	317228	292294	283741	173240	251998	352339	335027	297611	277134	327984	239726
M274T386_2	274.015	386.375	Fenaminosulf			Organic nitrogen compounds	Organonitrogen compounds	Amines	720730	720923	781027	547360	528914	674295	552426	431839	508563	663381	781787	647577
M375T437_1	375.009	436.818	Fenazaflor		C19029				567190	628745	1.14005e+06	631086	527005	725525	1.16735e+06	1.30432e+06	1.79041e+06	270819	1.1109e+06	187453
M159T165	159.027	165.252	Fenfluramine		C06996	Benzenoids	Benzene and substituted derivatives	Phenethylamines	110335428	7.33458e+07	6.38618e+07	8.23467e+07	8.47851e+07	9.59599e+07	8.29603e+07	8.02734e+07	8.61612e+07	6.75472e+07	7.64299e+07	8.32739e+07
M274T63_2	274.274	63.0474	Fenpropidin		C18726				835163675	748694232	648423736	1169802772	568428575	848441096	875101006	664497042	769725378	960850372	769776156	694919472
M290T97	290.269	97.1291	Fingolimod			Organic nitrogen compounds	Organonitrogen compounds	Amines	3.78007e+07	4.03722e+07	2.48972e+07	3.11514e+07	1.89932e+07	2.70671e+07	2.60244e+07	3.01723e+07	7.60407e+07	2.82182e+07	37526095	36736510
M533T32	533.107	31.904	Flavone base + 3o, c-pen, c-pen			Phenylpropanoids and polyketides	Flavonoids	Flavonoid glycosides	1.04705e+06	1.22773e+06	1.7128e+06	1.25061e+06	1.17628e+06	1.06044e+06	1.0594e+06	1.17585e+06	1.02948e+06	831725	1.08208e+06	854305
M228T386_2	228.049	386.068	Flonicamid		C18463	Organoheterocyclic compounds	Pyridines and derivatives	Pyridinecarboxylic acids and derivatives	843141	1128896	945868	503982	663532	601696	558048	554341	610374	646146	639954	702255
M286T496	286.087	496.182	Fludarabine		C21550				361483	205305	378262	322136	436803	331360	441779	698608	547623	435662	438533	574294
M152T449	152.057	448.505	Flufenacet		C18731	Benzenoids	Benzene and substituted derivatives	Anilides	358957	312878	753535	139162	269192	161194	340699	367134	490367	312347	473894	348280
M226T642	226.107	642.26	Flufenacet oa			Organic acids and derivatives	Carboxylic acids and derivatives	Amino acids, peptides, and analogues	7.85655e+06	2.12017e+07	1.86827e+07	2.1193e+07	3.44157e+07	2.2078e+07	2.18796e+07	1.88057e+07	95009.7	2.34675e+07	9.23773e+06	1.98769e+07
M417T390	417.21	389.758	Flunisolide	HMDB0014326	C07005	Lipids and lipid-like molecules	Steroids and steroid derivatives	Hydroxysteroids	232388	303947	266136	211859	242757	268161	268357	234058	680103	243310	304513	327775
M166T707	166.097	706.716	Fluorene		C07715				4.6237e+07	4.48023e+07	41463840	5.85087e+07	5.77912e+07	6.79623e+07	4.21224e+07	4.5102e+07	1.56769e+07	4.59852e+07	3.97787e+07	5.84062e+07
M399T25	399.179	24.6989	Fluorometholone	HMDB0014469		Lipids and lipid-like molecules	Steroids and steroid derivatives	Pregnane steroids	275638	496255	201155	460713	89642.7	210746	631882	224595	186135	344073	340559	263494
M277T300_2	277.062	299.908	Flutamide	HMDB0014642	C07653	Benzenoids	Benzene and substituted derivatives	Trifluoromethylbenzenes	211857063	203225410	215046062	123578574	534560961	145162349	503568478	739583081	838748773	390431532	173180375	565514538
M474T426	474.173	425.915	Folinic acid	HMDB0001562/HMDB0062757	C03479	Organic acids and derivatives	Carboxylic acids and derivatives	Amino acids, peptides, and analogues	113384	142902	119717	147813	233299	250107	192672	189315	160844	95983.1	163739	101449
M164T581	164.035	580.711	Formylanthranilic acid	HMDB0004089	C05653	Benzenoids	Benzene and substituted derivatives	Benzoic acids and derivatives	7.89445e+06	1.40123e+07	17628494	9.06312e+06	1.06654e+07	7.6568e+06	1.26246e+07	1.06906e+07	76863.5	9.76262e+06	2.22537e+07	1.00719e+07
M433T192	433.233	192.235	Forskolin		C09076	Lipids and lipid-like molecules	Prenol lipids	Triterpenoids	177709	53342.5	190770	342047	183215	269005	255992	220749	248582	265930	192939	239636
M203T383	203.053	382.995	Fructose	HMDB0000660	C01496	Organic oxygen compounds	Organooxygen compounds	Carbohydrates and carbohydrate conjugates	693545	864040	680042	339145	332546	276419	467017	401663	381990	411891	372444	484875
M459T185	459.248	185.01	Fumagillin		C09668	Lipids and lipid-like molecules	Fatty Acyls	Fatty acids and conjugates	632236	671142	407157	1.8411e+06	657542	1.99247e+06	950545	441922	288804	1.21466e+06	1.1304e+06	1.35915e+06
M115T225	115.021	225.426	Fumarate	HMDB0000134	C00122	Organic acids and derivatives	Carboxylic acids and derivatives	Dicarboxylic acids and derivatives	2.39448e+06	1.57067e+06	3.72738e+06	1.04862e+06	1.46833e+06	1.16889e+06	1.07021e+06	1.0118e+06	2.52247e+06	1051931	3.20402e+06	1.05259e+06
M226T290	226.045	289.61	Furazolidone	HMDB0014752	C07999	Organoheterocyclic compounds	Furans	Nitrofurans	939307	895894	1.23721e+06	447241	866249	692989	951960	1.28655e+06	1.39798e+06	799023	909323	932114
M275T445	275.089	444.663	Gamma-l-glutamyl-l-glutamic acid	HMDB0011737	C05282	Organic acids and derivatives	Carboxylic acids and derivatives	Amino acids, peptides, and analogues	3.22929e+06	2.54732e+06	5.5776e+06	2.47705e+06	1.78498e+06	3.10483e+06	1.47718e+06	1.31447e+06	1.08835e+06	2.43397e+06	3.13912e+06	1.6866e+06
M375T68	375.031	68.1773	Gangaleoidin						1.50477e+06	1533764	999703	1.53826e+06	2.40412e+06	1.72294e+06	2.62872e+06	3.13871e+06	2.86802e+06	891133	1.53403e+06	645902
M497T28	497.295	28.4382	Ganoderic acid a			Lipids and lipid-like molecules	Prenol lipids	Triterpenoids	38920.7	50359.1	84044.4	30520.2	59563.7	74352.5	39761.5	50473.1	55141.1	63639.9	50653.6	52713.4
M359T389	359.125	389.121	Gardenin b		C15109	Phenylpropanoids and polyketides	Flavonoids	O-methylated flavonoids	1.45725e+07	1.81625e+07	1.7698e+07	15062946	1.7925e+07	1.71537e+07	1.74409e+07	3.71291e+07	3.80106e+07	1.57931e+07	1.77143e+07	17638704
M315T26	315.137	26.4674	Gatifloxacin	HMDB0015178	C07661	Organoheterocyclic compounds	Quinolines and derivatives	Quinoline carboxylic acids	538964	670211	708633	365208	362906	398418	459552	270870	315622	293005	292116	354361
M404T213_1	403.993	212.649	Gemcitabine diphosphate	HMDB0060639		Organic oxygen compounds	Organic oxoanionic compounds	Organic pyrophosphates	219173	311407	351040	192105	303193	257286	391216	433256	401443	338775	333919	393398
M249T33	249.153	32.6972	Gemfibrozil	HMDB0015371	C07020				2.6967e+06	2.41375e+06	2.80949e+06	2.6608e+07	2.88402e+07	2.94607e+07	1.4402e+07	1.67264e+07	16303635	1.4422e+07	1.63894e+07	1.86139e+07
M497T25	497.28	24.6873	Geneticin		C17703	Organic oxygen compounds	Organooxygen compounds	Carbohydrates and carbohydrate conjugates	859429	1.16043e+06	916012	766578	792019	1.01984e+06	1.00096e+06	1.0446e+06	822209	742269	847233	951536
M249T576	249.077	576.46	Genipin	HMDB0035830	C09780	Lipids and lipid-like molecules	Prenol lipids	Monoterpenoids	6.03591e+06	5.80703e+06	2.44977e+06	7.04006e+06	5.73476e+06	4.34653e+06	7.90033e+06	8.42791e+06	5.49202e+06	5.36322e+06	7.26646e+06	6.07391e+06
M269T17	269.054	16.8937	Genistein	HMDB0003217	C06563	Phenylpropanoids and polyketides	Isoflavonoids	Isoflav-2-enes	15101.5	27778.8	26623.5	27333.3	42302.7	27496.3	32170.1	8122.11	29219	23537.3	21088.7	24846.5
M146T343	146.093	343.478	G-guanidinobutyrate	HMDB0003464	C01035	Organic acids and derivatives	Carboxylic acids and derivatives	Amino acids, peptides, and analogues	3.40507e+06	4.50446e+06	4.00185e+06	1.63435e+06	1.89101e+06	2.09176e+06	2.22806e+06	3.06461e+06	3.06828e+06	2.08126e+06	2.68636e+06	2.31463e+06
M287T27	287.143	27.1866	Gibberellin a4		C11864	Lipids and lipid-like molecules	Prenol lipids	Diterpenoids	88374.1	140541	161171	147622	194845	138600	229462	173294	269905	219494	201087	171114
M375T437_2	375.199	436.603	Glu-Ala-Arg			Organic acids and derivatives	Carboxylic acids and derivatives	Amino acids, peptides, and analogues	643603	547613	834430	247327	763195	459930	540887	1.19356e+06	1.47288e+06	411725	439667	520154
M304T379	304.162	378.743	Glu-Arg	HMDB0028813		Organic acids and derivatives	Carboxylic acids and derivatives	Amino acids, peptides, and analogues	1.40947e+06	1.76289e+06	2.58177e+06	742460	1.6322e+06	1.06156e+06	1.65283e+06	2.46424e+06	3.91561e+06	1.56532e+06	1.25756e+06	1.27863e+06
M436T290	436.024	289.755	Glucoraphanin	HMDB0038404	C08419	Organic oxygen compounds	Organooxygen compounds	Carbohydrates and carbohydrate conjugates	156246	161895	246428	74155.2	167971	144427	145772	265980	262018	151081	198710	183484
M259T444_1	259.023	443.73	Glucose 1-phosphate	HMDB0001586	C00103	Organic oxygen compounds	Organooxygen compounds	Carbohydrates and carbohydrate conjugates	7.8837e+06	3.97499e+07	1.95175e+07	1.40868e+07	1.89529e+07	1.38372e+07	3.11933e+07	2.07344e+07	3.55404e+07	1.27134e+07	2.5212e+07	2.99703e+07
M180T718	180.034	718.442	Glufosinate		C05042	Organic acids and derivatives	Carboxylic acids and derivatives	Amino acids, peptides, and analogues	2.00636e+06	1.98602e+06	2.2129e+06	2.82646e+06	2.84934e+06	2.54234e+06	2.14259e+06	2.00028e+06	2.20161e+06	2.26636e+06	2.12939e+06	3.18212e+06
M560T390	560.341	389.764	Glutamate conjugated cholic acid			Lipids and lipid-like molecules	Steroids and steroid derivatives	Bile acids, alcohols and derivatives	168725	297300	545516	51179.3	441621	185918	294386	679319	1.35779e+06	286711	278032	190438
M148T387	148.061	386.914	Glutamic acid	HMDB0000148	C00025	Organic acids and derivatives	Carboxylic acids and derivatives	Amino acids, peptides, and analogues	3.73473e+07	5.66824e+07	4.89817e+07	21912058	3.037e+07	29950387	2.8945e+07	3.44946e+07	34363208	2.71133e+07	3.28203e+07	36058224
M613T483	613.16	482.855	Glutathione, oxidized	HMDB0003337	C00127	Organic acids and derivatives	Carboxylic acids and derivatives	Amino acids, peptides, and analogues	727437	1.0579e+06	1.00278e+06	587496	1.02523e+06	669008	1.05365e+06	1.39082e+06	1.22429e+06	957128	1.0514e+06	1.30912e+06
M392T191	392.183	191.125	Glu-Val-Phe			Organic acids and derivatives	Carboxylic acids and derivatives	Amino acids, peptides, and analogues	943430	784541	1.19251e+06	333461	1190023	669697	869049	2.03218e+06	2.23025e+06	638529	737231	1004937
M105T298	105.019	297.646	Glyceric acid	HMDB0031818	C00258	Organic oxygen compounds	Organooxygen compounds	Carbohydrates and carbohydrate conjugates	2.71926e+06	4.70187e+06	2.72873e+06	4.70658e+06	5.12331e+06	8.28169e+06	6.48347e+06	7.95492e+06	4.73407e+06	6.06213e+06	2.12102e+06	7.36295e+06
M91T38_3	91.0302	38.4248	Glycerol	HMDB0000131	C00116	Organic oxygen compounds	Organooxygen compounds	Carbohydrates and carbohydrate conjugates	3.68182e+06	4.95636e+06	4.35223e+06	3.38172e+06	3.12538e+06	3.31331e+06	4.16808e+06	3.95047e+06	3.36295e+06	3.8528e+06	4.29422e+06	3.86009e+06
M258T372_3	258.11	372.196	Glycerophosphocholine	HMDB0000086	C00670	Lipids and lipid-like molecules	Glycerophospholipids	Glycerophosphocholines	160660759	235860964	83803328	295874640	275213217	281297703	448777924	457291642	235959229	419806929	121012823	517697792
M547T191	547.472	190.923	Glyceryl tripalmitoleate	HMDB0005432		Lipids and lipid-like molecules	Glycerolipids	Triradylcglycerols	4.85617e+06	5.09435e+06	9.49785e+06	4.48083e+06	4.20469e+06	5.03951e+06	4.13157e+06	3.79469e+06	3.93557e+06	4.14219e+06	4.34129e+06	4.08639e+06
M74T371	74.0247	371.346	Glycine	HMDB0000123	C00037	Organic acids and derivatives	Carboxylic acids and derivatives	Amino acids, peptides, and analogues	2.98806e+06	3.33277e+06	1.02205e+07	3.54052e+06	3.13288e+06	2.96827e+06	2.66545e+06	3.12374e+06	3.68263e+06	3.14323e+06	1.05948e+07	2.85443e+06
M296T436	296.086	436.28	Glycine, n-[(4-hydroxy-1-methyl-7-phenoxy-3-isoquinolinyl)carbonyl]-			Organic acids and derivatives	Carboxylic acids and derivatives	Amino acids, peptides, and analogues	868764	995034	954176	783393	984930	824512	944128	1.01821e+06	911730	996281	970666	1.14961e+06
M448T199	448.307	198.833	Glycochenodeoxycholate	HMDB0000637	C05466	Lipids and lipid-like molecules	Steroids and steroid derivatives	"Bile acids, alcohols and derivatives"	158244	168363	262017	223870	289631	168282	378625	211208	413128	122612	223540	243823
M488T399	488.283	398.974	Glycocholate	HMDB0000138	C01921	Lipids and lipid-like molecules	Steroids and steroid derivatives	Bile acids, alcohols and derivatives	589382	302548	782149	159062	724382	303651	728013	1.21898e+06	1.54908e+06	390324	270885	258604
M464T179	464.315	179.034	Glycocholic acid	HMDB0000138	C01921	Lipids and lipid-like molecules	Steroids and steroid derivatives	Bile acids, alcohols and derivatives	2.04721e+06	2.3361e+06	1.49815e+06	3.71516e+06	2.34368e+06	2.99747e+06	2.39065e+06	2.5074e+06	2.73014e+06	2.97034e+06	2.95426e+06	2.74769e+06
M357T147	357.279	147.138	Glycodeoxycholic acid	HMDB0000631	C05464	Lipids and lipid-like molecules	Steroids and steroid derivatives	Bile acids, alcohols and derivatives	2.12323e+07	1.83327e+07	100837	2.76445e+07	2.5408e+07	2.70922e+07	2.3821e+07	2.28759e+07	2.42861e+07	2.40674e+07	2.36023e+07	2.29965e+07
M75T580	75.0088	580.394	Glycolate	HMDB0000115	C00160	Organic acids and derivatives	Hydroxy acids and derivatives	Alpha hydroxy acids and derivatives	1.62645e+07	1.63571e+07	1.64254e+07	1.21003e+07	1.61306e+07	1.26881e+07	1.66354e+07	1.65017e+07	1.65952e+07	1.59179e+07	1.69083e+07	16730390
M131T345	131.046	345.101	Gly-Gly	HMDB0011733	C02037	Organic acids and derivatives	Carboxylic acids and derivatives	Amino acids, peptides, and analogues	918391	1.0836e+06	896642	741139	722053	893600	838341	958551	747274	921648	641550	894327
M339T26	339.2	26.3345	Gly-His-Lys			Organic acids and derivatives	Carboxylic acids and derivatives	Amino acids, peptides, and analogues	2.01973e+07	3.87362e+07	1.89855e+07	23973446	8.34259e+06	2.3246e+07	1.95394e+07	1.52563e+07	1.5289e+07	2.2506e+07	1.75741e+07	2.57401e+07
M187T252_2	187.109	251.752	Gly-Leu	HMDB0000759	C02155	Organic acids and derivatives	Carboxylic acids and derivatives	Amino acids, peptides, and analogues	824647	1.86541e+06	2.06947e+06	750640	950996	1.46527e+06	1.80306e+06	3.32356e+06	2.00452e+06	1.54515e+06	1.47271e+06	2.10668e+06
M262T383	261.979	382.704	Glyphosine		C19132	Organic acids and derivatives	Carboxylic acids and derivatives	Amino acids, peptides, and analogues	91241.7	108816	112782	103595	51341.2	109562	88495.8	95582.4	84678.2	122896	101189	102131
M329T436	329.194	436.351	Gly-Pro-Arg			Organic acids and derivatives	Carboxylic acids and derivatives	Amino acids, peptides, and analogues	427868	975010	1.09117e+06	291491	1.31341e+06	869087	670173	728407	1.09505e+06	683793	597258	1.04494e+06
M501T389	501.199	389.027	Gossypol	HMDB0040723	C07667	Lipids and lipid-like molecules	Prenol lipids	Sesquiterpenoids	1.71933e+06	2.61589e+06	4.21042e+06	1.75683e+06	2.39349e+06	2.11844e+06	2.26859e+06	3.50678e+06	4.91247e+06	2.06981e+06	2.40175e+06	4.37815e+06
M214T386	214.006	386.294	Guanabenz		C07034	Benzenoids	Benzene and substituted derivatives	Halobenzenes	1.66629e+07	1.60772e+07	1.65818e+07	1.12837e+07	1.24687e+07	1.30042e+07	1.30551e+07	1.23359e+07	1.24818e+07	1.3715e+07	1.39925e+07	1.66735e+07
M176T255	176.066	254.657	Guanidinosuccinic acid		C03139	Organic acids and derivatives	Carboxylic acids and derivatives	Amino acids, peptides, and analogues	5.08546e+06	4.96016e+06	5.61574e+06	3.57423e+06	4.33165e+06	4.47806e+06	4.78134e+06	6.10373e+06	5.83948e+06	4.45578e+06	4.42883e+06	4.54387e+06
M152T254	152.057	253.989	Guanine	HMDB0000132	C00242	Organoheterocyclic compounds	Imidazopyrimidines	Purines and purine derivatives	7.55363e+06	24079953	10259050	9.36545e+06	4.98564e+06	9.64023e+06	1.00328e+07	1.29862e+07	6.4292e+06	5.88227e+06	9.33347e+06	1.4835e+07
M368T435	368.023	434.573	Guanosine 3',5'-cyclic monophosphate	HMDB0001314	C00942	Nucleosides, nucleotides, and analogues	Purine nucleotides	Cyclic purine nucleotides	292940	180734	402600	531668	750282	636493	482505	628410	634574	574521	634620	689329
M650T433	650.036	433.26	Guanosine 5'-diphospho-.alpha.-d-mannose	HMDB0001163	C00096	Nucleosides, nucleotides, and analogues	Purine nucleotides	Purine nucleotide sugars	355213	461433	336435	266889	243886	310929	233420	290382	278470	310716	286139	301721
M362T448	362.051	448.242	Guanosine 5'-monophosphate	HMDB0001397	C00144	Nucleosides, nucleotides, and analogues	Purine nucleotides	Purine ribonucleotides	2.39537e+06	2.83278e+06	4.31039e+06	964575	2.24579e+06	1.17339e+06	2.27151e+06	2.41491e+06	3.22118e+06	1.9528e+06	2.60592e+06	1.9487e+06
M444T443	444.032	442.89	Guanosine diphosphate		C00035				37046.9	192888	166936	32716.1	153634	130404	37823.5	193691	199001	111225	161594	137105
M103T224	103.062	224.336	Guanylurea						1.46691e+06	1.64862e+06	1.71646e+06	1.10214e+06	1.06522e+06	1.12563e+06	1.09541e+06	1.19514e+06	1.04207e+06	1.04562e+06	1.48376e+06	1.12924e+06
M215T39	215.125	38.9992	Harmaline	HMDB0030310	C06536	Alkaloids and derivatives	Harmala alkaloids		5.60561e+06	6.75227e+06	8.34797e+06	1.01479e+07	7.002e+06	1.24613e+07	1.09606e+07	1.07907e+07	1.01938e+07	1.03622e+07	8.2598e+06	1.12299e+07
M213T407	213.124	407.428	Harmine	HMDB0030311	C06538	Alkaloids and derivatives	Harmala alkaloids		807047	1.12999e+06	1.13936e+06	506640	431079	857438	668896	1.182e+06	560142	552097	580019	954208
M437T485	437.262	485.13	Hc toxin		C15676	Organic acids and derivatives	Carboxylic acids and derivatives	Amino acids, peptides, and analogues	3.89693e+06	5.72405e+06	5.56766e+06	1.03383e+06	3.68445e+06	1.25642e+06	4.19223e+06	6.80413e+06	7.67149e+06	3.92426e+06	1.5298e+06	4.34287e+06
M138T57	138.091	57.4519	Heliotrine		C10324				3.14088e+06	1.93835e+06	6.07242e+06	3.04326e+06	1.74992e+06	2.53134e+06	4.31259e+06	3.08434e+06	5.20002e+06	2.58205e+06	4.2341e+06	3.10809e+06
M269T79	269.249	79.3492	Heptadecanoic acid	HMDB0002259		Lipids and lipid-like molecules	Fatty Acyls	Fatty acids and conjugates	638566	676436	671572	1.36037e+06	1.43719e+06	1.49343e+06	2.10776e+06	1.14558e+06	383996	1.16401e+06	1.26051e+06	1.06053e+06
M268T158	268.264	158.491	Heptadecasphing-4-enine			Organic nitrogen compounds	Organonitrogen compounds	Amines	183881	195343	147940	459627	137028	297578	314144	256388	168001	289832	157676	337499
M288T37	288.29	36.892	Heptadecasphinganine			Organic nitrogen compounds	Organonitrogen compounds	Amines	5.49171e+07	3.67574e+07	5.28898e+07	8.33904e+07	8.07673e+07	8.79437e+07	9.58101e+07	8.84024e+07	368084523	9.78692e+07	9.17255e+07	8.05491e+07
M625T28	625.133	27.9427	Herbacetin-3,8-diglucopyranoside			Phenylpropanoids and polyketides	Flavonoids	Flavonoid glycosides	1.24664e+06	1.37443e+06	1.56606e+06	1.04956e+06	1.08651e+06	1.12484e+06	909303	1.03951e+06	859137	1.00707e+06	1.01912e+06	1023038
M341T187	341.305	186.682	Hexadecylacetylglycerol			Lipids and lipid-like molecules	Glycerolipids	Diradylglycerols	5.37534e+06	5.90861e+06	5.02204e+06	7.2994e+06	8.15777e+06	6.31524e+06	6.16195e+06	6.10927e+06	5.99711e+06	8.42546e+06	7.34691e+06	9.06286e+06
M283T75	283.175	75.2891	Hexaethylene glycol	HMDB0061822		Organic oxygen compounds	Organooxygen compounds	Ethers	1.24187e+07	8.88195e+06	1.89249e+07	2.25238e+07	3.63801e+06	1.49012e+07	1.1367e+07	6.45735e+06	9.98526e+06	1.06886e+07	1.20804e+07	1.36839e+07
M223T30	223.064	29.623	Hexamethylcyclotrisiloxane			Organometallic compounds	Organometalloid compounds	Organosilicon compounds	932047	850537	1.64281e+06	2.73276e+06	390487	636562	621993	1.36365e+06	789953	700257	2.02299e+06	1.73786e+06
M102T36	102.128	36.2779	Hexylamine	HMDB0032323	C08306	Organic nitrogen compounds	Organonitrogen compounds	Amines	1.48852e+07	1.71653e+07	13647439	1.66064e+07	1.65978e+07	1.57013e+07	1.46932e+07	1.61779e+07	1.56328e+07	2.87171e+07	1.36324e+07	1.36651e+07
M269T291_2	269.161	291.245	His-Leu		C05010	Organic acids and derivatives	Carboxylic acids and derivatives	Amino acids, peptides, and analogues	725313	1.09568e+06	2.09186e+06	657189	1.23476e+06	1.6722e+06	1.68006e+06	3.06767e+06	2.19259e+06	1.28434e+06	625728	1.23297e+06
M282T254_2	282.085	254.201	His-Lys	HMDB0000133	C00387				6.88704e+06	2.08437e+07	9.11329e+06	8.922e+06	4.40982e+06	8.79809e+06	9.03522e+06	1.15573e+07	5.68406e+06	5.15159e+06	8.89953e+06	1.33875e+07
M285T31	285.223	31.1673	His-Met	HMDB0005801	C05903	Phenylpropanoids and polyketides	Flavonoids	Flavones	2.02943e+06	2.0658e+06	2.05078e+06	2.17014e+06	2.32495e+06	2.32039e+06	1.84647e+06	2.05173e+06	1.96514e+06	2.09444e+06	1.96591e+06	2.46498e+06
M241T604	241.002	603.999	His-ser	HMDB0000273	C00214	Nucleosides, nucleotides, and analogues	Pyrimidine nucleosides	Pyrimidine 2'-deoxyribonucleosides	4.19604e+06	4158257	2.87155e+06	4.33e+06	4.71643e+06	4.31427e+06	4.36173e+06	5.07994e+06	2.32399e+06	4.32401e+06	4.05264e+06	2.21541e+06
M156T536	156.077	536.192	Histidine	HMDB0000177	C00135	Organic acids and derivatives	Carboxylic acids and derivatives	Amino acids, peptides, and analogues	1.12003e+07	1.17097e+07	2.16865e+07	9.50409e+06	1.00457e+07	9.90785e+06	10612913	1.20592e+07	1.40992e+07	8.09472e+06	11789929	1.3744e+07
M205T118	205.029	118.177	Homocitrate	HMDB0003518	C01251	Organic acids and derivatives	Carboxylic acids and derivatives	Tricarboxylic acids and derivatives	292580	284898	311615	987603	438138	942332	1.09804e+06	928064	755261	1.22086e+06	1.05837e+06	1.24372e+06
M243T641	243.134	641.26	Huperzine a			Organoheterocyclic compounds	Quinolines and derivatives	Quinolones and derivatives	8.58025e+06	1.47383e+07	6.14421e+06	1.18071e+07	9.60205e+06	8.94333e+06	1.09841e+07	8.66477e+06	1.13947e+07	1.69118e+07	6.47163e+06	2.22791e+06
M325T26_2	325.184	26.4527	Hydroquinidine		C10696				28718089	3.60112e+07	2.5861e+07	4.05828e+07	2.2118e+07	3.96705e+07	3.41561e+07	2.7424e+07	2.61119e+07	3.44719e+07	3.07755e+07	4.36082e+07
M111T79	111.055	78.8184	Hydroquinone	HMDB0002434	C00530	Benzenoids	Phenols	Benzenediols	1.35161e+07	4.8337e+07	4.12474e+07	3.45124e+07	4.43949e+07	22264344	51619167	3.10446e+07	1.89161e+07	3.70835e+07	2.62016e+07	3.34144e+07
M486T541	486.286	540.836	Hydroxyebastine			Benzenoids	Benzene and substituted derivatives	Diphenylmethanes	349686	352225	561258	84593.8	387545	174211	493828	701009	1.26329e+06	182504	305516	239394
M181T185	181.051	185.133	Hydroxyphenyllactic acid	HMDB0000755	C03672	Phenylpropanoids and polyketides	Phenylpropanoic acids		5.32303e+06	5.51733e+06	5.89357e+06	2.78235e+06	7.0813e+06	3.92448e+06	7.29718e+06	8.24475e+06	8291700	7.71575e+06	5.91578e+06	9.38472e+06
M108T213	108.02	213.108	Hypotaurine	HMDB0000965	C00519	Organic acids and derivatives	Sulfinic acids and derivatives	Sulfinic acids	1.79257e+06	1.7175e+06	2.0833e+06	1.52691e+06	1.51665e+06	1554156	1.4766e+06	1.3701e+06	1.76179e+06	1.61471e+06	1.79648e+06	1.37689e+06
M137T167_2	137.046	166.649	Hypoxanthine	HMDB0000157	C00262	Organoheterocyclic compounds	Imidazopyrimidines	Purines and purine derivatives	2669601132	2145317271	1951776891	2222567251	2176023674	2321624987	2221837169	2178661029	2390794834	2166493923	2162742715	2170577252
M288T322	288.203	322.335	Ile-Arg			Organic acids and derivatives	Carboxylic acids and derivatives	Amino acids, peptides, and analogues	3.71057e+06	4.09379e+06	5.43017e+06	1.20611e+06	1.73677e+06	1.60382e+06	2.73488e+06	4.06261e+06	3.55023e+06	1.16593e+06	1.60554e+06	3.14589e+06
M243T181	243.172	180.503	Ile-Leu			Organic acids and derivatives	Carboxylic acids and derivatives	Amino acids, peptides, and analogues	4.55443e+06	8.42338e+06	1.06167e+07	3.74028e+06	2.74946e+06	3.7379e+06	5.23825e+06	7.08753e+06	6.57331e+06	2.84782e+06	2.94783e+06	5.58485e+06
M261T183	261.128	183.355	Ile-Met			Organic acids and derivatives	Carboxylic acids and derivatives	Amino acids, peptides, and analogues	1.82868e+06	3.00117e+06	4.74019e+06	735170	1.08503e+06	1.30826e+06	1.96788e+06	1.89563e+06	2.22075e+06	863662	961573	2.11979e+06
M233T233	233.15	232.95	Ile-Thr			Organic acids and derivatives	Carboxylic acids and derivatives	Amino acids, peptides, and analogues	461536	1.2125e+06	1.95539e+06	428696	624645	465622	1.09332e+06	1.83914e+06	1.29888e+06	618291	463106	1.25798e+06
M492T218	492.259	218.126	Imatinib	HMDB0014757		Benzenoids	Benzene and substituted derivatives	Anilides	285560	331927	261573	80507.1	29716.3	95233.9	57901.3	20120.9	23563.7	88503.9	69039.1	60301.8
M244T383	244.167	382.689	Imazethapyr		C18865	Organic acids and derivatives	Carboxylic acids and derivatives	Amino acids, peptides, and analogues	27891.1	63232.9	83361.1	16698.1	49163.4	15552.5	74227.2	196200	99508.4	8162.17	9193.38	103616
M319T643	319.167	643.383	Imiprothrin			Organoheterocyclic compounds	Azolidines	Imidazolidines	515630	439374	831454	1.21309e+06	1.06929e+06	837720	930702	1.03601e+06	1.07108e+06	950963	1.16516e+06	1.08595e+06
M158T186	158.082	186.19	Indole-3-butyric acid	HMDB0002096	C11284	Organoheterocyclic compounds	Indoles and derivatives	Indoles	1.18731e+06	1.10308e+06	1.2218e+06	1.00752e+06	1.49625e+06	1.11654e+06	1.18063e+06	1.63365e+06	2.20867e+06	1.47053e+06	1.3482e+06	1.35871e+06
M158T51	158.06	51.3966	Indole-3-pyruvic acid	HMDB0060484	C00331	Organoheterocyclic compounds	Indoles and derivatives	Indolyl carboxylic acids and derivatives	4.25831e+06	2.43595e+06	4.21813e+06	2.39237e+06	3.16507e+06	2.58294e+06	2.92828e+06	6.63354e+06	3.49605e+06	3.48077e+06	3.2239e+06	3.58005e+06
M188T286	188.074	286.464	Indoleacrylic acid	HMDB0000734		Organoheterocyclic compounds	Indoles and derivatives	Indoles	2.56933e+06	3.30186e+06	3.2047e+06	1.41204e+06	1.59347e+06	1.48508e+06	1.31663e+06	1.95761e+06	1.85038e+06	1.50161e+06	1.95634e+06	1.70904e+06
M158T140	158.061	139.519	Indolelactic acid	HMDB0000671	C02043	Organoheterocyclic compounds	Indoles and derivatives	Indolyl carboxylic acids and derivatives	491953	578732	449060	92925.6	497384	444870	431974	552801	554651	316590	338353	723554
M212T28	212.005	27.7876	Indoxyl sulfate	HMDB0000682		Organic acids and derivatives	Organic sulfuric acids and derivatives	Arylsulfates	701901	998500	685295	1.30547e+06	652073	875146	1.14297e+06	731859	720704	1.35632e+06	1.04892e+06	1.07944e+06
M371T26	371.163	26.1457	Ingenol		C09112	Lipids and lipid-like molecules	Prenol lipids	Diterpenoids	539773	656536	547346	681658	542716	630159	641531	570923	715812	691914	623977	739970
M267T213_3	267.074	212.713	Inosine	HMDB0000195	C00294	Nucleosides, nucleotides, and analogues	Purine nucleosides		190369528	374389067	245188778	201685273	182759445	235739755	259055319	278172659	188718115	199333523	217903068	320469828
M347T433	347.04	433.262	Inosine 5'-monophosphate	HMDB0000175	C00130	Nucleosides, nucleotides, and analogues	Purine nucleotides	Purine ribonucleotides	3.69513e+06	3.69602e+06	1.44585e+07	1.6297e+06	6.51727e+06	2.08923e+06	2.56806e+06	3.39133e+06	6.8705e+06	3.36211e+06	4.6333e+06	2.01968e+06
M290T386	289.993	386.327	Iprodione	HMDB0031795	C11208	Organoheterocyclic compounds	Azolidines	Imidazolidines	2.85081e+06	2.88941e+06	2.91816e+06	2.29861e+06	2.15698e+06	2.36525e+06	2.17068e+06	1.98394e+06	1.8123e+06	2.45389e+06	2.75183e+06	2.77674e+06
M254T26	254.14	25.7643	Irgarol		C10927	Organoheterocyclic compounds	Triazines	1,3,5-triazines	1.23648e+06	1.18113e+06	1.24742e+06	1.50209e+06	1.16159e+06	1.05725e+06	1.20429e+06	1.17005e+06	1.16949e+06	1.29162e+06	1.13601e+06	1.18474e+06
M521T25	521.107	24.8539	Iridin		C10465	Phenylpropanoids and polyketides	Isoflavonoids	Isoflavonoid O-glycosides	6.39488e+06	7.13518e+06	7.61639e+06	5.41996e+06	5.64882e+06	5.88957e+06	5.41764e+06	5.69785e+06	4.81642e+06	5.3654e+06	5.62938e+06	5.53547e+06
M162T291	162.05	290.988	Isazophos		C19001	Organic acids and derivatives	Organic thiophosphoric acids and derivatives	Thiophosphoric acid esters	595607	679158	828816	403305	562369	592399	700130	678795	702024	608010	707747	656806
M367T383	367.106	382.928	Isoanhydroicaritin			Phenylpropanoids and polyketides	Flavonoids	Flavones	1.96498e+06	2.64857e+06	2.53492e+06	691158	692440	781529	1.05184e+06	1.07773e+06	977993	926048	1.01384e+06	1.34471e+06
M232T247_2	232.154	246.889	Isobutyryl-l-carnitine	HMDB0000736		Lipids and lipid-like molecules	Fatty Acyls	Fatty acid esters	1.35621e+07	1.988e+07	1.50194e+07	7.41304e+07	8.47018e+07	9.28474e+07	9.20227e+07	110603242	7.70036e+07	7.25097e+07	6.9703e+07	108970406
M207T625_1	207.124	625.033	Isoeugenyl acetate	HMDB0032348					264902136	166297858	266203796	174570949	236341752	195206138	258888387	307816189	233103631	377693201	323195554	267058389
M221T592	221.031	592.483	Isofraxidin		C17480	Phenylpropanoids and polyketides	Coumarins and derivatives	Hydroxycoumarins	2.29139e+06	1.44236e+06	1.23818e+06	3.26646e+06	2.59053e+06	2.52619e+06	1.7002e+06	1.35608e+06	2.07008e+06	3.17655e+06	3.1001e+06	2.41695e+06
M653T24	653.301	23.9618	Isohernandezine						184739	155019	133369	87519.1	76607.7	95648.8	130813	123272	154284	223842	234263	173790
M130T583	130.087	582.547	Isoleucine	HMDB0033923	C00407	Organic acids and derivatives	Carboxylic acids and derivatives	"Amino acids, peptides, and analogues"	2.75835e+06	7.05656e+06	6.06653e+06	2.18625e+06	1.24889e+06	2.28822e+06	2.07525e+06	1.02578e+06	6.46303e+06	1.91448e+06	1.87837e+06	1.84809e+06
M291T62	291.102	62.4406	Isomethiozin		C19107	Organosulfur compounds	Thioethers	Aryl thioethers	1.2884e+07	1.11064e+07	1.14656e+07	5.72288e+06	9.26092e+06	7.3311e+06	6.23319e+06	7.34986e+06	9.36639e+06	6.93615e+06	6.28609e+06	7.85766e+06
M429T23	429.08	22.9749	Isoorientin		C01821	Phenylpropanoids and polyketides	Flavonoids	Flavonoid glycosides	7.17779e+06	7.81397e+06	8.48522e+06	6.59946e+06	7.02871e+06	6.69912e+06	5.89278e+06	6.52294e+06	5.6572e+06	6.50643e+06	6.6178e+06	6.32817e+06
M139T36	139.123	36.0927	Isophorone	HMDB0031195	C14743	Organic oxygen compounds	Organooxygen compounds	Carbonyl compounds	5.82902e+06	3.7435e+06	3.25312e+06	7.11274e+06	6.29872e+06	5.56277e+06	3.60185e+06	3.99209e+06	4.95385e+06	4.8675e+06	3.90437e+06	4.23185e+06
M285T34_2	285.243	34.2807	Isopimaric acid		C09118	Lipids and lipid-like molecules	Prenol lipids	Diterpenoids	1.15661e+07	1.13879e+07	1.04708e+07	1.21008e+07	1.16163e+07	13173749	1.35102e+07	1.2509e+07	12314266	1.43416e+07	1.3451e+07	1.31478e+07
M194T315_2	194.118	315.268	Isoproterenol	HMDB0015197	C07056	Benzenoids	Phenols	Benzenediols	3.26577e+07	3.43326e+07	3.32541e+07	2.65328e+07	3.079e+07	3.2896e+07	3.38201e+07	3.17948e+07	3.29437e+07	3.51525e+07	3.358e+07	2.64258e+07
M207T20	207.124	20.3078	Isoproturon		C11005	Benzenoids	Benzene and substituted derivatives	N-phenylureas	9.33142e+07	9.06641e+07	9.19467e+07	9.27539e+07	8.79016e+07	90029946	9.52161e+07	7.25805e+07	5.20617e+07	506637	9.24171e+07	7.45192e+07
M101T63	101.061	63.1523	Isovaleric acid	HMDB0000718	C08262	Lipids and lipid-like molecules	Fatty Acyls	Fatty acids and conjugates	1.13997e+06	1.36765e+06	1.19159e+06	1.15822e+06	954847	910025	982770	1.1644e+06	1.02649e+06	1.70318e+06	1.04838e+06	1.14214e+06
M187T231	187.097	230.702	Isovaleryl-l-carnitine			Lipids and lipid-like molecules	Fatty Acyls	Fatty acid esters	360694	392338	433299	1.05056e+06	1.10354e+06	1.22489e+06	1.67398e+06	1.63594e+06	1.55296e+06	1.19321e+06	1.55711e+06	1.67491e+06
M426T169	426.319	168.642	Jervine		C10811	Lipids and lipid-like molecules	Steroids and steroid derivatives	Steroidal alkaloids	2.77043e+06	2.61597e+06	2.82223e+06	2.2485e+06	2.62901e+06	2.24566e+06	1.92503e+06	2.07572e+06	2.23827e+06	2.98725e+06	3.25202e+06	2.26543e+06
M485T27	485.281	26.8012	Kendomycin						352738	506497	188799	810882	257652	221022	696580	236351	225805	852295	578700	293310
M179T705_1	179.065	704.703	Ketamine	HMDB0015352	C07525	Benzenoids	Benzene and substituted derivatives	Halobenzenes	1.50604e+06	1.65305e+06	1.73803e+06	1.64053e+06	1.68734e+06	1.40202e+06	1.6702e+06	1.54104e+06	1.49445e+06	1.50297e+06	1.54046e+06	3.30438e+06
M737T389	737.19	389.089	Ketazolam	HMDB0015526		Organoheterocyclic compounds	Benzodiazepines	1,4-benzodiazepines	244277	747539	817242	470527	932918	886099	983399	1.48068e+06	1.61952e+06	654179	967474	911293
M129T38	129.056	38.4418	Ketoleucine	HMDB0000695	C00233	Organic acids and derivatives	Keto acids and derivatives	Short-chain keto acids and derivatives	1.06903e+06	1.02745e+06	917786	1.028e+06	1.44898e+06	893796	1.00053e+06	2.61885e+06	686279	854159	784298	806324
M261T301_2	261.088	300.792	Khellin		C09010	Organoheterocyclic compounds	Benzopyrans	1-benzopyrans	39162543	33804086	34369118	3.85997e+07	114122091	4.20742e+07	6.87874e+07	8.97811e+07	109109025	4.05988e+07	3.91209e+07	7.88022e+07
M431T26	431.095	26.1342	Khelloside		C09011	Organoheterocyclic compounds	Benzopyrans	1-benzopyrans	6.55957e+06	16092169	8.0448e+06	4.09497e+06	3.31513e+06	3.69788e+06	11426525	3.85853e+06	3.40241e+06	3.96318e+06	3.52268e+06	4.61924e+06
M141T413	141.017	412.584	Kojic acid	HMDB0032923	C14516	Organoheterocyclic compounds	Pyrans	Pyranones and derivatives	6.46288e+07	5.97812e+07	5.7502e+07	5.4644e+07	57729969	5.56115e+07	5.56057e+07	5.74201e+07	5.7953e+07	7.4626e+07	5.54463e+07	8.10466e+07
M529T29	529.305	28.5864	Kukoamine a	HMDB0030392		Benzenoids	Phenols	Benzenediols	102517	179614	66857.6	131465	13906.5	52691.2	254928	56189.9	43545.6	68447.3	78165.7	67463.6
M101T299	101.024	298.957	L-(+)-erythrulose		C02045	Organic oxygen compounds	Organooxygen compounds	Carbohydrates and carbohydrate conjugates	2.00626e+06	3.98076e+06	2.09273e+06	1.88619e+06	2.22383e+06	1.87515e+06	2.46316e+06	2.68991e+06	8.77199e+06	2.2843e+06	2.00271e+06	4.51509e+06
M365T390_6	365.106	389.748	Lactose	HMDB0000186	C00243	Organic oxygen compounds	Organooxygen compounds	Carbohydrates and carbohydrate conjugates	197367601	405935427	440520538	369805365	584084933	584716679	678860634	904187965	940092437	517088594	587559363	568826228
M455T36	455.242	36.2412	L-alaninamide, n-[2-[2-(hydroxyamino)-2-oxoethyl]-4-methyl-1-oxopentyl]-3-(2-naphthalenyl)-l-alanyl-			Organic acids and derivatives	Carboxylic acids and derivatives	Amino acids, peptides, and analogues	739706	805933	711376	1.28851e+06	1.02791e+06	546613	1.46551e+06	1.08639e+06	973653	1.11705e+06	1.49327e+06	1.34176e+06
M448T162	448.342	161.667	L-arachidonoylcarnitine			Lipids and lipid-like molecules	Fatty Acyls	Fatty acid esters	156495	32391.3	364302	340293	268716	429249	248613	146989	831973	123346	1.59349e+06	277460
M189T264	189.135	263.618	L-arginine, methyl ester			Organic acids and derivatives	Carboxylic acids and derivatives	Amino acids, peptides, and analogues	1.37858e+06	1.22292e+06	2.38739e+06	614614	851478	744846	969435	1.90733e+06	1.4654e+06	742061	969498	938832
M132T395	132.03	395.058	L-aspartic acid	HMDB0062186	C00049	Organic acids and derivatives	Carboxylic acids and derivatives	Amino acids, peptides, and analogues	1.33655e+07	1.47922e+07	1.90712e+07	6.17632e+06	1.02356e+07	8.48185e+06	6.70247e+06	9.00313e+06	1.28549e+07	6.67367e+06	1.03784e+07	8.1881e+06
M230T140	230.248	140.043	Lauryldimethylamine oxide			Organic nitrogen compounds	Organonitrogen compounds	Aminoxides	4.49491e+07	2.77612e+07	35688222	4.92434e+07	2.84557e+07	2.96312e+07	4.06362e+07	3.24305e+07	3.7846e+07	4.51e+07	3.32424e+07	3.16319e+07
M162T341_3	162.112	340.684	L-carnitine	HMDB0062496	C00318	Organic nitrogen compounds	Organonitrogen compounds	Quaternary ammonium salts	9.02064e+07	8.94519e+07	9.57365e+07	229920967	260605686	263518694	270503609	285609724	301220083	215962912	350946135	336090395
M225T406_2	225.1	406.236	L-Carnosine	HMDB0000033	C00386	Organic acids and derivatives	Peptidomimetics	Hybrid peptides	318570	583470	488856	470180	498169	411460	730174	655922	746129	622755	434613	536227
M198T379_3	198.085	379.195	L-citrulline	HMDB0000904	C00327	Organic acids and derivatives	Carboxylic acids and derivatives	Amino acids, peptides, and analogues	6.11112e+07	6.8167e+07	101432961	3.67232e+07	6.12727e+07	4.74988e+07	8.25343e+07	7.88043e+07	109305617	61009889	5.7824e+07	61059974
M304T388	304.061	387.986	L-cysteine-glutathione disulfide			Organic acids and derivatives	Carboxylic acids and derivatives	Amino acids, peptides, and analogues	3.80764e+06	4.49074e+06	3.83428e+06	3.40377e+06	3.90516e+06	3.59676e+06	4.07373e+06	4.25504e+06	3.49547e+06	3.84237e+06	4.18125e+06	4.67782e+06
M286T455	286.087	455.372	Letrozole	HMDB0015141	C08163	Benzenoids	Benzene and substituted derivatives	Diphenylmethanes	1.0597e+07	1.30343e+07	1.19049e+07	9.14817e+06	1.43019e+07	1.14609e+07	1.48084e+07	1.64334e+07	1.62726e+07	1.30509e+07	1.2811e+07	16065709
M203T226	203.139	225.512	Leu-Ala			Organic acids and derivatives	Carboxylic acids and derivatives	Amino acids, peptides, and analogues	440692	788740	2.49433e+06	406554	1.1498e+06	426686	951987	1.79997e+06	1.52437e+06	787442	446056	118676
M286T323	286.189	322.682	Leu-Arg			Organic acids and derivatives	Carboxylic acids and derivatives	Amino acids, peptides, and analogues	791668	927846	1.13258e+06	256092	383613	362835	609225	826009	789611	263498	332120	643329
M132T255_2	132.102	254.637	Leucine	HMDB0000687	C00123	Organic acids and derivatives	Carboxylic acids and derivatives	Amino acids, peptides, and analogues	4.08979e+07	4.55345e+07	4.74509e+07	2.64423e+07	39493095	3.77734e+07	4.11671e+07	56710682	6.02737e+07	3.51937e+07	3.42359e+07	4.14139e+07
M245T181	245.186	181.095	Leucylleucine	HMDB0028933	C11332	Organic acids and derivatives	Carboxylic acids and derivatives	Amino acids, peptides, and analogues	3.37743e+06	6.74215e+06	8.22898e+06	2.82537e+06	2.03797e+06	2.7813e+06	3.56336e+06	5.09328e+06	4.40612e+06	2.26219e+06	2.24561e+06	4.18695e+06
M417T326	417.246	325.877	Leu-Glu-Arg			Organic acids and derivatives	Carboxylic acids and derivatives	Amino acids, peptides, and analogues	2.29429e+06	1.97867e+06	6.26094e+06	529733	1.58865e+06	959469	1.7626e+06	3.3825e+06	4.31319e+06	1.77435e+06	1.23409e+06	1.40835e+06
M279T167	279.17	167.377	Leu-Phe			Organic acids and derivatives	Carboxylic acids and derivatives	Amino acids, peptides, and analogues	2.3481e+06	3.96515e+06	7.05864e+06	1.17207e+06	2.12735e+06	1.88282e+06	4.03619e+06	5.899e+06	6.88336e+06	1.57573e+06	1.41564e+06	4.2788e+06
M219T244	219.134	244.215	Leu-Ser			Organic acids and derivatives	Carboxylic acids and derivatives	Amino acids, peptides, and analogues	225112	721748	683560	304400	322404	251802	581871	835966	1.15298e+06	474696	250154	928209
M295T198	295.165	198.417	Leu-Tyr			Organic acids and derivatives	Carboxylic acids and derivatives	Amino acids, peptides, and analogues	1.13424e+06	1382390	2.11451e+06	386075	758636	648393	1.34336e+06	2.02323e+06	2.12857e+06	517470	536277	1.38789e+06
M231T192	231.17	192.285	Leu-Val			Organic acids and derivatives	Carboxylic acids and derivatives	Amino acids, peptides, and analogues	7.51381e+06	1.50212e+07	1.79279e+07	6.85534e+06	8.06245e+06	7.35385e+06	1.53774e+07	2.15624e+07	1.95298e+07	9.33221e+06	6.26854e+06	1.5522e+07
M146T418	146.046	417.784	L-Glutamate	HMDB0000148	C00025	Organic acids and derivatives	Carboxylic acids and derivatives	"Amino acids, peptides, and analogues"	521591	611761	636745	529596	436240	586598	491911	369094	456353	613004	532861	539468
M276T407_1	276.119	407.353	L-glutarylcarnitine	HMDB0013130		Lipids and lipid-like molecules	Fatty Acyls	Fatty acid esters	238823	452350	504144	224640	377001	301836	372219	677305	577090	402789	319794	412020
M306T389_1	306.077	389.436	L-glutathione, reduced	HMDB0062697	C00051	Organic acids and derivatives	Carboxylic acids and derivatives	Amino acids, peptides, and analogues	1.60171e+06	3.11215e+06	2.73247e+06	1.18574e+06	1.67119e+06	1.59041e+06	1.79326e+06	2.92834e+06	2.44473e+06	1.57396e+06	2.84656e+06	2.68617e+06
M189T506	189.135	505.664	L-homoarginine	HMDB0000670	C01924	Organic acids and derivatives	Carboxylic acids and derivatives	Amino acids, peptides, and analogues	4.71057e+06	3.97594e+06	6.86034e+06	2.44441e+06	6.29074e+06	4.70622e+06	4.05533e+06	1.06145e+06	4.94539e+06	663236	1.48617e+06	773161
M377T45	377.236	44.6407	L-homocitrulline	HMDB0000679	C02427	Organic acids and derivatives	Carboxylic acids and derivatives	Amino acids, peptides, and analogues	1.11968e+06	1.17432e+06	1.09983e+06	1.08771e+06	1.74072e+06	1.45857e+06	1.39515e+06	1.51942e+06	1.49838e+06	1.13823e+06	1.4433e+06	1.3685e+06
M182T373	182.023	372.65	L-homocysteic acid	HMDB0002205	C16511	Organic acids and derivatives	Carboxylic acids and derivatives	Amino acids, peptides, and analogues	1.88718e+06	2.83321e+06	707983	5.80357e+06	4.63633e+06	5.60339e+06	6.51899e+06	6.1059e+06	2.53658e+06	6.44277e+06	1.57458e+06	8.03538e+06
M674T172	673.53	172.284	Linoleoylglycine			Organic acids and derivatives	Carboxylic acids and derivatives	Amino acids, peptides, and analogues	3.10411e+06	3.50942e+06	3.22393e+06	2.82179e+06	2.93177e+06	2.28669e+06	2.15064e+06	2.11626e+06	2.21875e+06	2.87118e+06	3.53515e+06	2.53121e+06
M130T302	130.087	301.681	L-Isoleucine	HMDB0000172	C00407	Organic acids and derivatives	Carboxylic acids and derivatives	"Amino acids, peptides, and analogues"	6.94277e+06	3.11357e+06	2.36236e+06	2.27838e+06	3.08147e+06	2.65767e+06	2.25574e+06	3.48917e+06	3.6281e+06	2.81669e+06	7.03321e+06	2.86441e+06
M434T170	434.34	169.643	Lithocholylglycine	HMDB0000698	C15557	Lipids and lipid-like molecules	Steroids and steroid derivatives	Bile acids, alcohols and derivatives	1.82114e+06	2.03132e+06	2.08521e+06	1.70329e+06	1.30777e+06	1.62786e+06	1.32277e+06	1.28788e+06	1.18491e+06	1315710	1.49416e+06	1.46058e+06
M229T291	229.155	291.397	L-leucyl-l-proline	HMDB0011175		Organic acids and derivatives	Carboxylic acids and derivatives	Amino acids, peptides, and analogues	1.13792e+06	1.32479e+06	1.25532e+06	978272	1.09989e+06	1.25289e+06	1.39324e+06	1.45716e+06	1.43831e+06	1.30249e+06	1.35542e+06	1.38463e+06
M150T274	150.057	274.234	L-methionine	HMDB0000696	C00073	Organic acids and derivatives	Carboxylic acids and derivatives	Amino acids, peptides, and analogues	4.67542e+06	5.66256e+06	6.40761e+06	3.40493e+06	5.10252e+06	4.39045e+06	4.71513e+06	8.0467e+06	7.98259e+06	4.72987e+06	4.70172e+06	5.39966e+06
M118T686	118.086	686.122	L-norvaline	HMDB0013716	C01826	Organic acids and derivatives	Carboxylic acids and derivatives	Amino acids, peptides, and analogues	1.77498e+06	1.8405e+06	2.01785e+06	1.89579e+06	2.1961e+06	1.81319e+06	2.00577e+06	1.81211e+06	1.62298e+06	2.97619e+06	1.26227e+06	1.69219e+06
M730T475	730.239	475.337	Lnt	HMDB0006566		Organic oxygen compounds	Organooxygen compounds	Carbohydrates and carbohydrate conjugates	334341	427729	472647	158745	116209	175897	155651	246204	174909	173495	203212	204752
M202T100	202.18	99.5641	Lobelanidine		C10156	Organic nitrogen compounds	Organonitrogen compounds	Amines	447602	395132	503079	668506	251960	433030	911518	793954	794182	394607	513317	614704
M334T389	334.137	389.081	Lomefloxacin	HMDB0015113	C07078	Organoheterocyclic compounds	Quinolines and derivatives	Quinoline carboxylic acids	638999	891654	886633	1.1529e+06	985946	903231	927215	1.44774e+06	1.56692e+06	900909	1.87022e+06	1.93625e+06
M447T218	447.242	218.442	Lopinavir	HMDB0015539	C12871	Organic acids and derivatives	Carboxylic acids and derivatives	Amino acids, peptides, and analogues	2.84667e+06	2.10558e+06	2.44439e+06	902276	988400	1.04409e+06	811131	798982	853667	1.06689e+06	911350	952902
M400T165	400.342	165.421	L-palmitoylcarnitine	HMDB0000222	C02990	Lipids and lipid-like molecules	Fatty Acyls	Fatty acid esters	2.95737e+06	5014767	7.38692e+06	7.46837e+06	6.18578e+06	9.8224e+06	9.91667e+06	14526514	1.28377e+07	9.14533e+06	3.50629e+07	1.44075e+07
M522T127	522.356	126.585	Lpc 18:1			Lipids and lipid-like molecules	Glycerophospholipids	Glycerophosphocholines	7.27156e+06	1.79565e+07	1.25611e+07	1.00666e+07	5.9179e+06	1.86186e+07	2.22237e+07	2.86945e+07	1.34938e+07	1.68909e+07	8.36487e+06	2.78463e+07
M480T156	480.309	155.843	Lpe 18:1			Lipids and lipid-like molecules	Glycerophospholipids	Glycerophosphoethanolamines	1.99653e+06	6.59528e+06	1.6725e+06	1.12023e+07	1.22917e+07	1.14019e+07	5.9487e+06	16368146	1.73914e+07	8.70927e+06	8.75438e+06	1.35142e+07
M130T521	130.087	520.987	L-pipecolic acid	HMDB0000716	C00408	Organic acids and derivatives	Carboxylic acids and derivatives	Amino acids, peptides, and analogues	2.48164e+07	2.66518e+07	2.99168e+07	1.90351e+07	2.40069e+07	1.64688e+07	2.61086e+07	3.39228e+07	3.94825e+07	3.3284e+07	2.62949e+07	3.86756e+07
M218T269_2	218.139	269.077	L-propionylcarnitine	HMDB0062514		Lipids and lipid-like molecules	Fatty Acyls	Fatty acid esters	5.55761e+07	7.11999e+07	4.71486e+07	179313502	184562565	207617504	273024538	282141841	208416307	237472349	177417579	275159316
M128T386	128.035	386.224	L-pyroglutamic acid	HMDB0000267	C01879	Organic acids and derivatives	Carboxylic acids and derivatives	Amino acids, peptides, and analogues	1.11559e+07	1.52522e+07	1.39958e+07	7.09797e+06	9.04686e+06	8.67062e+06	8.23447e+06	9.265e+06	9.35854e+06	8.1203e+06	9.31534e+06	1.03472e+07
M104T294	104.035	294.034	L-Serine	HMDB0000187/HMDB0062263	C00065	Organic acids and derivatives	Carboxylic acids and derivatives	"Amino acids, peptides, and analogues"	589776	724858	737331	148362	248515	199072	294551	350124	400294	336359	335556	364299
M118T346	118.051	346.469	L-threonine	HMDB0004041	C05519	Organic acids and derivatives	Carboxylic acids and derivatives	Amino acids, peptides, and analogues	13100955	1.58539e+07	1.85406e+07	5.83981e+06	8.74805e+06	7.81437e+06	8.36717e+06	1.08215e+07	1.24948e+07	7.70166e+06	9.01075e+06	8.81684e+06
M369T26	369.298	25.503	Luffariellolide		C19901	Lipids and lipid-like molecules	Prenol lipids	Terpene lactones	592963	1.22689e+06	384988	732886	931275	952392	934429	1.12895e+06	1.34577e+06	1.30521e+06	392862	1.15582e+06
M259T301	259.074	300.923	Lumichrome		C01727	Organoheterocyclic compounds	Pteridines and derivatives	Alloxazines and isoalloxazines	3.28334e+06	3.10197e+06	3.49998e+06	3.42477e+06	4.429e+06	3.46029e+06	3.91866e+06	4.37735e+06	4.28929e+06	3.7423e+06	3.26618e+06	4.52913e+06
M413T157_2	413.268	156.983	Lupulone		C10706				252654	287005	214660	329119	193014	303639	316302	334338	220936	218088	187743	291384
M116T391	116.072	390.911	L-Valine	HMDB0000883	C00183	Organic acids and derivatives	Carboxylic acids and derivatives	"Amino acids, peptides, and analogues"	1.26556e+06	1.27717e+06	1.35348e+06	1.2665e+06	1.53075e+06	916416	1.53686e+06	1.28492e+06	1.90467e+06	1.33504e+06	8.10982e+06	1.20602e+06
M204T438	204.134	437.884	Lys-Gly			Organic acids and derivatives	Carboxylic acids and derivatives	Amino acids, peptides, and analogues	474244	972526	1.04299e+06	324552	307851	396879	377355	995469	614120	299241	433862	490738
M145T513	145.098	513.476	Lysine	HMDB0000182	C00047	Organic acids and derivatives	Carboxylic acids and derivatives	Amino acids, peptides, and analogues	6.06475e+06	5.04412e+06	7.432e+06	4.40376e+06	8.23526e+06	4.84967e+06	1.29638e+06	6.19211e+06	1.00756e+07	5.70577e+06	5.72612e+06	7.18586e+06
M187T205	187.048	205.073	Mafenide		C07106	Benzenoids	Benzene and substituted derivatives	Benzenesulfonamides	6.70965e+06	6.77275e+06	7.68181e+06	5.55203e+06	5.11446e+06	1.62078e+06	1.06797e+06	6.37764e+06	5.69016e+06	3.41446e+06	6.92587e+06	6.23154e+06
M265T24_2	265.148	24.3368	Magnolol		C10651	Benzenoids	Benzene and substituted derivatives	Biphenyls and derivatives	2.14436e+07	2.46244e+07	1.55326e+07	3.03766e+07	1.19046e+07	1.91014e+07	1.92153e+07	1.67821e+07	1.39801e+07	1.81833e+07	2.07638e+07	1.56394e+07
M133T395_1	133.014	394.99	Malate	HMDB0000156	C00149	Organic acids and derivatives	Hydroxy acids and derivatives	Beta hydroxy acids and derivatives	7.19089e+06	1.14949e+07	5.93238e+06	6.40591e+06	1.1107e+07	8730353	8.74022e+06	1.10199e+07	1.16943e+07	9.75377e+06	5.49364e+06	1.09169e+07
M533T156	533.285	155.925	Manumycin a		C12111	Organic oxygen compounds	Organooxygen compounds	Carbonyl compounds	514500	673697	180209	330698	332886	306975	997752	1.51269e+06	750952	454124	474770	555454
M227T278	227.068	277.546	Marmesin						1.27871e+06	881916	1.23651e+06	1.07232e+06	785196	804693	1.0141e+06	775231	659792	763332	873748	1.11614e+06
M352T390_2	352.055	389.773	Mecarbam	HMDB0031800	C18661	Organic acids and derivatives	Organic dithiophosphoric acids and derivatives	Dithiophosphate O-esters	681438	1.33813e+06	1.30761e+06	519293	676487	698368	806203	1.2435e+06	1.39893e+06	735582	1.30357e+06	1.41681e+06
M127T32_1	127.075	32.3264	Melamine	HMDB0041922	C08737	Organoheterocyclic compounds	Triazines	1,3,5-triazines	2.3064e+06	2.6265e+06	2.53983e+06	2.0824e+06	1.91677e+06	2.53621e+06	7.05143e+06	1.70848e+06	2.18927e+06	2.34363e+06	1.88597e+06	2.0425e+06
M255T350	255.1	350.331	Melatonin	HMDB0001389	C01598	Organoheterocyclic compounds	Indoles and derivatives	Indoles	474644	576078	444213	366121	698318	440064	624958	817144	737365	622603	381838	686118
M527T415	527.159	414.718	Melezitose	HMDB0011730	C08243	Organic oxygen compounds	Organooxygen compounds	Carbohydrates and carbohydrate conjugates	372991	698594	5586.47	31580.5	44189.7	41474.8	1.38063e+06	1.56381e+06	1.72092e+06	1.43245e+06	1.64677e+06	1.73775e+06
M173T63	173.078	63.3753	Menadione	HMDB0001892	C05377	Benzenoids	Naphthalenes	Naphthoquinones	3.41178e+06	7.65052e+06	1.07216e+07	3.58284e+06	3.16447e+06	3.54977e+06	3.38473e+06	3.15578e+06	4.4495e+06	2.33758e+06	1.00684e+07	5.57982e+06
M275T31	275.169	30.6518	Menthyl salicylate			Benzenoids	Benzene and substituted derivatives	Benzoic acids and derivatives	1.1829e+06	915863	1.4656e+06	2.08256e+06	242015	791685	1.29122e+06	764271	599621	653101	3.65836e+06	889996
M248T309	248.149	309.349	Meperidine	HMDB0014597	C07128	Organoheterocyclic compounds	Piperidines	Phenylpiperidines	2.31685e+06	3.68697e+06	2.98186e+06	6.02093e+06	6.50059e+06	7.11022e+06	6.98142e+06	7.49531e+06	6.64791e+06	4.9434e+06	6.39034e+06	8.32337e+06
M309T24	309.174	24.3749	Mestranol	HMDB0015446	C07618	Lipids and lipid-like molecules	Steroids and steroid derivatives	Estrane steroids	4.75395e+06	7.17261e+06	3.11467e+06	6.87507e+06	2.33606e+06	3.5178e+06	6.60904e+06	3.32069e+06	2.33031e+06	4.27343e+06	5.08664e+06	3.59043e+06
M180T431	180.088	430.716	Metanephrine	HMDB0004063	C05588	Benzenoids	Phenols	Methoxyphenols	9.04071e+06	7.02935e+06	1.36884e+07	3.51171e+06	6.22353e+06	4.51976e+06	4.4306e+06	4.75569e+06	8.58983e+06	5.30171e+06	7652463	4.77695e+06
M244T456	244.04	456.012	Methabenzthiazuron		C10909				1.497e+06	1.97042e+06	1.67274e+06	1.41252e+06	2.06378e+06	1.91759e+06	2.25022e+06	1.93312e+06	1.97204e+06	2.01773e+06	2.26735e+06	2.5752e+06
M371T90	371.228	90.3646	Methyl (1-(cyclohexylmethyl)-1h-indole-3-carbonyl)-l-valinate			Organic acids and derivatives	Carboxylic acids and derivatives	Amino acids, peptides, and analogues	7.10411e+06	7.69977e+06	8.70382e+06	1.87037e+07	2.75933e+06	7.3039e+06	6.38027e+06	5.94736e+06	5.44921e+06	1.16152e+07	6.59145e+06	9.96375e+06
M599T388	599.236	388.396	Methyl 5,6-diacetyloxy-10-hydroxy-2,4b,7,7,10a,12a-hexamethyl-12-methylidene-1,4,8-trioxo-4a,5,6,6a,9,10,10b,11-octahydronaphtho[1,2-h]isochromene-2-carboxylate			Lipids and lipid-like molecules	Steroids and steroid derivatives	Oxosteroids	700933	1.16621e+06	1.04936e+06	420786	664178	629210	935241	804049	1.12294e+06	723530	1.00455e+06	1.04904e+06
M371T493	371.266	492.669	Methyl arachidonyl fluorophosphonate			Organic acids and derivatives	Organic phosphonic acids and derivatives	Phosphonic acid esters	279831	155834	248575	106531	177512	147771	128291	118948	231066	119908	258513	142846
M95T614	94.9806	613.578	Methylphosphonic acid		C20396	Organic acids and derivatives	Organic phosphonic acids and derivatives	Organic phosphonic acids	1.91076e+07	2.07312e+07	1.94982e+07	23985256	2.05504e+07	2.68839e+07	2.13915e+07	3.24222e+07	2.99905e+07	1.63299e+07	3.4213e+07	2.31071e+07
M111T35	110.976	34.5671	Methylphosphonothioic acid o-ethyl ester						6.25165e+06	7.78781e+06	6.82732e+06	8.10437e+06	6.69181e+06	6.95899e+06	7.13293e+06	6.7446e+06	5.81122e+06	7.39158e+06	6.75518e+06	7.33701e+06
M437T34_1	437.194	34.2777	Met-Met-Arg			Organic acids and derivatives	Carboxylic acids and derivatives	Amino acids, peptides, and analogues	625257	598590	499745	669364	1.22472e+06	1.19954e+06	1.29838e+06	2.09283e+06	1.05604e+06	975761	960661	434369
M202T659	202.109	658.674	Met-Pro-Arg			Organic acids and derivatives	Carboxylic acids and derivatives	Amino acids, peptides, and analogues	1.05192e+06	667752	718618	413890	414069	514029	422673	447753	399454	289047	578468	1.23664e+06
M147T337	147.068	337.116	Mevalonic acid	HMDB0059629	C00418	Lipids and lipid-like molecules	Fatty Acyls	Fatty acids and conjugates	409779	1.1159e+06	979248	247696	389275	219837	135915	131851	196860	138462	925834	275524
M415T434	415.001	433.764	Miconazole	HMDB0015242		Benzenoids	Benzene and substituted derivatives	Benzylethers	496526	423137	1.37678e+06	241861	597042	288283	341988	313830	619493	445437	522004	223690
M230T632	230.14	632.103	Milnacipran	HMDB0015602		Benzenoids	Benzene and substituted derivatives	Phenylacetamides	23601779	2.1657e+07	9.31079e+06	2.52161e+07	1.27052e+07	1.47724e+07	2.53943e+07	1.53249e+07	2.42875e+07	2.14499e+07	2.90895e+07	1.10604e+07
M210T373	210.054	373.345	Milrinone	HMDB0014380	C07224	Organoheterocyclic compounds	Pyridines and derivatives	Bipyridines and oligopyridines	298336	298655	130629	568656	390062	470101	557345	471099	268168	574688	238793	621033
M184T140	184.073	139.843	Miltefosine			Organic nitrogen compounds	Organonitrogen compounds	Quaternary ammonium salts	563978811	615323341	592108875	631944395	518143635	806812787	600387621	574044127	598996285	922900122	677849528	634792598
M397T26_2	397.227	25.7247	Mitragynine	HMDB0041933	C09226				1.52751e+06	2.34276e+06	1.11121e+06	1.87989e+06	637995	1.0738e+06	2.96103e+06	1.11787e+06	934907	1.50757e+06	1.46423e+06	1.14142e+06
M339T34_1	339.29	33.6868	Monoelaidin			Lipids and lipid-like molecules	Glycerolipids	Monoradylglycerols	169535245	182470362	179441296	179596016	135929012	180754736	166267853	147492181	159431078	165397177	156658896	155784927
M149T542	149.024	541.994	Monoisobutyl phthalate	HMDB0002056		Benzenoids	Benzene and substituted derivatives	Benzoic acids and derivatives	1.66559e+07	1.45841e+07	1.958e+07	8.73848e+07	2.37008e+07	1.75379e+07	1.75681e+07	1.78933e+07	1.60977e+07	2.1227e+07	1.66849e+07	14741099
M101T371	101.06	370.794	Monomethyl glutaric acid	HMDB0000858		Lipids and lipid-like molecules	Fatty Acyls	Fatty acid esters	402576	666477	429632	1.96168e+06	2.23724e+06	2.27209e+06	2.28591e+06	2.51439e+06	2.19417e+06	1.69803e+06	2.23785e+06	2.66026e+06
M285T423	284.87	423.443	Monomethyl tetrachloroterephthalate			Benzenoids	Benzene and substituted derivatives	Benzoic acids and derivatives	2.95899e+07	2.62372e+07	2.75899e+07	3.53106e+07	3.19925e+07	3.34468e+07	3.43972e+07	2.84841e+07	2.80336e+07	3.5387e+07	3.17317e+07	3.2464e+07
M88T9	88.0757	8.79625	Morpholine	HMDB0031581	C14452	Organoheterocyclic compounds	Oxazinanes	Morpholines	1.23355e+07	9.37113e+06	8.3065e+06	1.15493e+07	1.02615e+07	5.24623e+06	9.74744e+06	9.18575e+06	4.85668e+06	1.5919e+07	8.29835e+06	8.75485e+06
M434T389	434.201	389.053	Mycophenolate mofetil	HMDB0014826	C07908	Organoheterocyclic compounds	Isocoumarans	Isobenzofuranones	351297	775495	397070	323756	595186	361572	571397	546854	544911	389045	457368	415696
M179T383_2	179.056	382.582	Myo-inositol	HMDB0000211	C00137	Organic oxygen compounds	Organooxygen compounds	Alcohols and polyols	8.16352e+07	8.88175e+07	8.41921e+07	4.96891e+07	5.17134e+07	4.91049e+07	6.59583e+07	6.01048e+07	5.63829e+07	5.77598e+07	5.87747e+07	6.43109e+07
M258T135	258.279	135.222	Myristamine oxide			Organic nitrogen compounds	Organonitrogen compounds	Aminoxides	3.56333e+07	34314559	37752678	37235480	4.51779e+07	3.35454e+07	3.93927e+07	3.48084e+07	4.90935e+07	5.48064e+07	3.69711e+07	3.98381e+07
M227T37	227.202	36.8721	Myristic acid	HMDB0000806	C06424	Lipids and lipid-like molecules	Fatty Acyls	Fatty acids and conjugates	2.80451e+07	3.10343e+07	3.0399e+07	56807541	5.95093e+07	4.96567e+07	5.45534e+07	5.88711e+07	58429018	5.48763e+07	5.78309e+07	5.48435e+07
M272T34	272.259	34.3914	Myristoyl ethanolamide			Organic nitrogen compounds	Organonitrogen compounds	Amines	13876239	1.39738e+07	1.32345e+07	1.44901e+07	1.46125e+07	1.47284e+07	1.95449e+07	1.49095e+07	1.52644e+07	1.64999e+07	1.22078e+07	1.22603e+07
M372T169_2	372.311	169.454	Myristoyl-l-carnitine	HMDB0005066		Lipids and lipid-like molecules	Fatty Acyls	Fatty acid esters	2.85098e+06	1.53076e+06	848711	2.70785e+06	1.74154e+06	3.92263e+06	4.82089e+06	7.58887e+06	2.65987e+06	3.6659e+06	5.67079e+06	7.32968e+06
M508T33	508.474	33.1966	N-(1,3-dihydroxyoctadec-4-en-2-yl)tetradecanamide			Lipids and lipid-like molecules	Sphingolipids	Ceramides	622737	828118	768398	1.51081e+06	1.72921e+06	1.67021e+06	996069	1.19367e+06	1.18345e+06	1.57043e+06	1.64792e+06	1.64099e+06
M619T33_1	618.583	33.3291	N-(1.3-dihydroxyoctadeca-4.14-dien-2-yl)docosanimidic acid						387311	359418	321812	573440	630582	593919	382059	452623	412924	552411	722053	476571
M327T83	327.201	83.4125	N-(1-amino-3,3-dimethyl-1-oxobutan-2-yl)-1-pentyl-1h-indole-3-carboxamide			Organic acids and derivatives	Carboxylic acids and derivatives	Amino acids, peptides, and analogues	1.05626e+07	9.10738e+06	1.50268e+07	1.56578e+07	3.68178e+06	9.03203e+06	7.44223e+06	9.18529e+06	7.38167e+06	1.34595e+07	9.35311e+06	1.11493e+07
M642T157	642.488	156.805	N-(dodecanoyl)-1-.beta.-glucosyl-sphing-4-enine			Lipids and lipid-like molecules	Sphingolipids	Glycosphingolipids	856135	709983	603173	841060	590630	504417	614861	791602	767993	719217	727532	576774
M595T34	594.582	33.6744	N-(eicosanoyl)sphingosine	HMDB0004951		Lipids and lipid-like molecules	Sphingolipids	Ceramides	2.05696e+06	2.30196e+06	2.11858e+06	2.81513e+06	2.55856e+06	2.00013e+06	2.3815e+06	1.82761e+06	2.26022e+06	2.8986e+06	2.5903e+06	2.05878e+06
M732T171	731.606	170.563	N-(octadecanoyl)sphing-4-enine-1-phosphocholine	HMDB0001348	C00550	Lipids and lipid-like molecules	Sphingolipids	Phosphosphingolipids	5.68416e+07	6.95892e+07	5.34764e+07	4.5921e+07	4.4325e+07	3.97239e+07	3.99561e+07	4.01497e+07	3.5796e+07	5.09142e+07	5.02446e+07	4.67771e+07
M168T386	168.028	386.119	N-(phosphonomethyl)glycine		C01705	Organic acids and derivatives	Carboxylic acids and derivatives	Amino acids, peptides, and analogues	1.3844e+07	1.61971e+07	1.51486e+07	8.58654e+06	1.01294e+07	1.03789e+07	1.0264e+07	1.07667e+07	10897290	1.05842e+07	1.12819e+07	1.26172e+07
M189T512	189.161	512.101	N,n,n-trimethyllysine	HMDB0001325	C03793	Organic acids and derivatives	Carboxylic acids and derivatives	Amino acids, peptides, and analogues	4.51393e+06	4.76951e+06	5.53381e+06	3.76546e+06	4.21932e+06	4.85607e+06	4.70025e+06	4.93695e+06	6.57182e+06	4.49586e+06	5.27751e+06	2.70769e+06
M328T34_2	328.321	34.2188	N,n-dimethylsphingosine	HMDB0013645		Organic nitrogen compounds	Organonitrogen compounds	Amines	4.6801e+06	5.07114e+06	4.85208e+06	5.52706e+06	5.00975e+06	4.51118e+06	4.74311e+06	4.33984e+06	5.61373e+06	5.52528e+06	5.21909e+06	5.05056e+06
M187T114	187.134	114.15	N6,N6,N6-Trimethyl-L-lysine	HMDB0001325	C03793	Organic acids and derivatives	Carboxylic acids and derivatives	Amino acids, peptides, and analogues	629290	783619	1.09438e+06	851972	1.13535e+06	929160	876516	891656	951595	1.0038e+06	745725	861391
M171T147	171.149	147.209	N8-acetylspermidine	HMDB0002189	C01029	Organic acids and derivatives	Carboximidic acids and derivatives	Carboximidic acids	6.10028e+06	6.3851e+06	7.30115e+06	6.55839e+06	6.88367e+06	4.25511e+06	8.14866e+06	9.41555e+06	7.10612e+06	8.26883e+06	7.9208e+06	7.63222e+06
M186T423_2	186.076	422.723	N-acetyl-.beta.-d-mannosamine	HMDB0001129	C00645	Organic oxygen compounds	Organooxygen compounds	Carbohydrates and carbohydrate conjugates	3.82996e+07	4.97215e+07	4.49952e+07	24926095	3.20099e+07	3.26801e+07	2.98289e+07	3.3516e+07	3.34031e+07	3.25284e+07	3.66464e+07	4.03322e+07
M285T434	285.073	433.817	N-acetylaspartylglutamic acid	HMDB0001067	C12270	Organic acids and derivatives	Carboxylic acids and derivatives	Amino acids, peptides, and analogues	1.34652e+06	2.78796e+06	3.40545e+06	883065	2.44001e+06	1.49073e+06	1.40755e+06	2.09294e+06	2.41581e+06	1.38979e+06	1.77837e+06	2.22309e+06
M168T242	168.085	241.514	N-acetyl-d-galactosamine	HMDB0000212	C01074	Organic oxygen compounds	Organooxygen compounds	Carbohydrates and carbohydrate conjugates	201620	211059	225069	212082	210519	232424	224591	360507	261124	239109	209985	259627
M138T422	138.055	422.326	N-acetyl-d-glucosamine	HMDB0000215	C00140	Organic oxygen compounds	Organooxygen compounds	Carbohydrates and carbohydrate conjugates	3.07168e+07	4.03873e+07	3.69527e+07	1.97884e+07	24898920	2.41078e+07	2.4405e+07	2.75495e+07	2.86965e+07	2.65734e+07	3.01312e+07	30267469
M300T421	300.04	421.255	N-acetyl-d-glucosamine 6-phosphate	HMDB0001062	C00357	Organic oxygen compounds	Organooxygen compounds	Carbohydrates and carbohydrate conjugates	5.89536e+06	8.07452e+06	6.75326e+06	3.23414e+06	3.96521e+06	4.51397e+06	3.70685e+06	4.58745e+06	4.18311e+06	3.75777e+06	4.42287e+06	5.14475e+06
M308T145	308.295	145.018	N-acetyldihydrosphingosine			Lipids and lipid-like molecules	Sphingolipids	Ceramides	9.10819e+06	9.90695e+06	9.48385e+06	1.22083e+07	9.72249e+06	8.78168e+06	1.02272e+07	1.0686e+07	9680326	1.18099e+07	1.12496e+07	1.04365e+07
M406T360	406.132	359.979	N-acetyl-d-lactosamine	HMDB0006583	C00611	Lipids and lipid-like molecules	Fatty Acyls	Fatty acyl glycosides	960089	1.20172e+06	1.07926e+06	707189	814084	838719	721126	900966	795444	684970	895872	987344
M146T294	146.046	294.075	N-acetyl-dl-serine						2.11552e+07	2.53403e+07	2.57658e+07	5.50701e+06	8.18904e+06	7.41653e+06	9.20383e+06	1.22991e+07	1.35241e+07	1.10777e+07	1.18439e+07	1.26368e+07
M300T437	300.049	437.227	N-Acetylglucosamine 1-phosphate	HMDB0001367	C04256	Organic oxygen compounds	Organooxygen compounds	Carbohydrates and carbohydrate conjugates	1.2885e+06	1.82957e+06	1.59477e+06	819125	5.11031e+06	1.55339e+06	1.25565e+06	2.03709e+06	1.50265e+06	2.18567e+06	1.04502e+06	1.50692e+06
M154T708	154.087	708.231	N-acetylhistamine	HMDB0013253	C05135	Organic acids and derivatives	Carboxylic acids and derivatives	Carboxylic acid derivatives	439736	369624	1.78622e+06	1584362	1.49839e+06	2.09218e+06	306531	345420	1.64109e+06	2.8456e+06	5.57444e+06	2.14876e+06
M174T385_2	174.041	384.673	N-acetyl-l-aspartic acid	HMDB0000812	C01042	Organic acids and derivatives	Carboxylic acids and derivatives	Amino acids, peptides, and analogues	7.98125e+07	113394226	9.72802e+07	31742992	4.54466e+07	4.3656e+07	39613592	5.04965e+07	4.87155e+07	42770032	5.09048e+07	5.58132e+07
M188T378	188.057	378.337	N-acetyl-l-glutamate	HMDB0001138	C00624	Organic acids and derivatives	Carboxylic acids and derivatives	Amino acids, peptides, and analogues	5.0244e+06	5.90134e+06	6.01567e+06	3.1627e+06	4.22413e+06	3.94879e+06	4.04919e+06	4.96697e+06	4.55621e+06	3.8662e+06	4.163e+06	4.60026e+06
M190T195_1	190.054	194.619	N-acetyl-l-methionine	HMDB0011745	C02712	Organic acids and derivatives	Carboxylic acids and derivatives	Amino acids, peptides, and analogues	1.24669e+07	1.47151e+07	2.17385e+07	6.2915e+06	1.28612e+07	9.08608e+06	1.16098e+07	2.10393e+07	2.07893e+07	1.14379e+07	9.51296e+06	1.1046e+07
M166T248	166.086	248.173	N-acetyl-l-phenylalanine	HMDB0000512	C03519	Organic acids and derivatives	Carboxylic acids and derivatives	Amino acids, peptides, and analogues	4.47011e+07	4.52439e+07	5.79083e+07	2.57992e+07	4.26953e+07	3.72005e+07	4.19606e+07	6.36869e+07	6.36538e+07	3.70549e+07	3.83562e+07	4.30461e+07
M180T290	180.067	289.713	N-acetyl-l-tyrosine	HMDB0000866	C01657	Organic acids and derivatives	Carboxylic acids and derivatives	Amino acids, peptides, and analogues	3.9496e+06	4.3863e+06	5.7769e+06	2.11704e+06	4.17656e+06	3.09447e+06	3.90961e+06	6.77492e+06	7.19558e+06	3.25698e+06	3.65408e+06	4.07429e+06
M308T386_2	308.099	385.722	N-acetylneuraminate	HMDB0000230	C00270	Organic oxygen compounds	Organooxygen compounds	Carbohydrates and carbohydrate conjugates	102786	179117	60625.1	105425	134830	165694	160196	229011	156890	133502	186992	228090
M308T364_2	308.099	364.084	N-acetylneuraminic acid	HMDB0000230	C00270	Organic oxygen compounds	Organooxygen compounds	Carbohydrates and carbohydrate conjugates	1.77507e+06	2.35702e+06	2.03392e+06	2.01729e+06	2.09349e+06	2.28008e+06	2.16992e+06	2.66624e+06	2.22333e+06	1.79773e+06	2.14329e+06	2.47077e+06
M449T446	449.154	446.011	N-acetyl-p-fluoro-dl-phenylalanine			Organic acids and derivatives	Carboxylic acids and derivatives	Amino acids, peptides, and analogues	171997	179183	206839	291102	122201	365214	101686	28706.2	45693.2	144579	335115	155364
M129T72	129.092	71.7952	N-acetylputrescine	HMDB0002064	C02714	Organic acids and derivatives	Carboximidic acids and derivatives	Carboximidic acids	1.45863e+06	1.4325e+06	1.94946e+06	2.23534e+06	1.44873e+06	1.11965e+06	1.18087e+06	1.08759e+06	1.15574e+06	911383	1.84823e+06	885706
M342T186	342.309	186.392	N-acetylsphingosine			Lipids and lipid-like molecules	Sphingolipids	Ceramides	1.24963e+06	1.35964e+06	1.18534e+06	1.69225e+06	1.38152e+06	1.51816e+06	1.45557e+06	1.44395e+06	1.45837e+06	1.88416e+06	1.7219e+06	1.76869e+06
M597T301	597.08	300.721	Naphthol-as-bi-n-acetyl-.beta.-d-glucosaminide			Benzenoids	Naphthalenes	Naphthalenecarboxylic acids and derivatives	557844	430800	522136	258162	764749	450579	576777	286657	709937	476827	383576	622976
M390T135	390.277	135.23	N-arachidonoyl-.gamma.-aminobutyric acid			Organic acids and derivatives	Carboxylic acids and derivatives	Amino acids, peptides, and analogues	2.30329e+07	1.83344e+07	2.25635e+07	2.36082e+07	1.69328e+07	1.83694e+07	1.63913e+07	2.01217e+07	17866519	2.88161e+07	1.78068e+07	2.58521e+07
M404T157	404.257	156.838	N-arachidonoyl-3-hydroxy-.gamma.-aminobutyric acid			Organic acids and derivatives	Carboxylic acids and derivatives	Amino acids, peptides, and analogues	216279	138073	160498	225656	110364	92338.8	125692	151702	182506	144112	242138	191184
M438T195	438.3	194.659	N-arachidonoyldopamine			Benzenoids	Phenols	Benzenediols	126603	180620	127398	438818	367746	395502	394950	370567	471238	506700	304738	435266
M390T32	390.24	31.8807	N-arachidonoyl-l-serine			Organic acids and derivatives	Carboxylic acids and derivatives	Amino acids, peptides, and analogues	689084	555531	917008	745701	949573	1.09659e+06	805173	810958	846811	899216	894001	680023
M273T33	273.091	33.1325	Naringenin	HMDB0002670	C00509	Phenylpropanoids and polyketides	Flavonoids	Flavans	1.18139e+07	1.45768e+07	1.41536e+07	7.33614e+06	10571057	9.96185e+06	1.09197e+07	9.50395e+06	62306.9	7.63915e+06	1.19541e+07	11167894
M154T25_2	154.086	25.1219	N-butyryl-l-homoserine lactone			Organic acids and derivatives	Carboxylic acids and derivatives	Amino acids, peptides, and analogues	1.17986e+06	1.07687e+06	1.33743e+06	1.19866e+06	1.60794e+06	1.28384e+06	1.19783e+06	1.20779e+06	1.20211e+06	1.21501e+06	1.31438e+06	1.16941e+06
M338T662	338.342	662.206	N-cyclohexanecarbonylpentadecylamine			Organic acids and derivatives	Carboxylic acids and derivatives	Carboxylic acid derivatives	1.17297e+06	1.41985e+06	1.3632e+06	1.61565e+06	991151	1.33132e+06	1.25381e+06	1.38854e+06	1.16308e+06	1.36898e+06	1.57639e+06	1.7139e+06
M787T154	786.647	154.428	N-Docosanoyl-4-sphingenyl-1-O-phosphorylcholine						69003812	60557811	7.70516e+07	5.83699e+07	4.0973e+07	5.15905e+07	5.4964e+07	5.35682e+07	7.34831e+07	2.99489e+06	2.67187e+06	5.64177e+07
M87T235	87.0918	235.38	Neopentyl glycol			Organic oxygen compounds	Organooxygen compounds	Alcohols and polyols	1.10406e+06	1.18844e+06	1.05686e+06	1.45981e+06	1.15779e+06	1.26211e+06	1.28413e+06	1.46067e+06	1.15028e+06	1.10158e+06	1.02275e+06	1.143e+06
M365T36	365.343	36.2343	Nervonic acid	HMDB0002368	C08323	Lipids and lipid-like molecules	Fatty Acyls	Fatty acids and conjugates	1.93924e+07	1.94747e+07	1.97655e+07	2.90579e+07	2.69381e+07	16627320	18191796	1.87453e+07	2.00703e+07	1.54426e+07	2.59636e+07	1.77471e+07
M176T192	176.038	191.941	N-formyl-l-methionine	HMDB0001015	C03145	Organic acids and derivatives	Carboxylic acids and derivatives	Amino acids, peptides, and analogues	2.31766e+06	2.46692e+06	2.97584e+06	1.05392e+06	1.81452e+06	1.40154e+06	1.69306e+06	2.54028e+06	3.14662e+06	1.72271e+06	2012026	1.81495e+06
M203T484	203.15	484.423	Ng,ng-dimethyl-l-arginine	HMDB0001539	C03626	Organic acids and derivatives	Carboxylic acids and derivatives	Amino acids, peptides, and analogues	2.26391e+07	15119233	26243649	1.68006e+07	2.56987e+07	2.06447e+07	1.70329e+07	20138002	3.6264e+07	1.90224e+07	2.97137e+07	1.60096e+07
M124T220	124.024	219.738	Nicotinate	HMDB0001488	C00253	Organoheterocyclic compounds	Pyridines and derivatives	Pyridinecarboxylic acids and derivatives	1.58201e+07	1.51413e+07	1.82478e+07	1.6416e+07	1.62256e+07	1.6259e+07	1.69206e+07	1.69936e+07	1.83942e+07	1.63509e+07	1.67932e+07	1.74814e+07
M665T431	665.101	430.981	Nicotinic acid adenine dinucleotide	HMDB0001179	C00857	Nucleosides, nucleotides, and analogues	(5'->5')-dinucleotides		4.0453e+06	5.22486e+06	5.12926e+06	625840	932960	884860	1.71891e+06	2.10565e+06	1.93041e+06	1.39275e+06	1.82132e+06	1.92154e+06
M283T302	283.07	301.849	Niflumic acid	HMDB0015573	C13698	Benzenoids	Benzene and substituted derivatives	Trifluoromethylbenzenes	5.56116e+06	5.18336e+06	4.88596e+06	5.24752e+06	1.2163e+07	5.60269e+06	6.06667e+06	7.04002e+06	9.19624e+06	5.30481e+06	5.34642e+06	6.75321e+06
M288T421	288.065	420.943	Nifurtimox		C08002	Organoheterocyclic compounds	Furans	Nitrofurans	2.2078e+06	2.67278e+06	2.37166e+06	2.08501e+06	2.19773e+06	2.08237e+06	1.58019e+06	2719772	1.84143e+06	2.86713e+06	2.60681e+06	1.8417e+06
M269T601	268.969	601.191	Nitrofen	HMDB0041951	C11065	Benzenoids	Benzene and substituted derivatives	Diphenylethers	1.14152e+06	2.83857e+06	2.65156e+06	2.45136e+06	2.50198e+06	991325	1.42529e+06	2.70677e+06	2.93815e+06	1.655e+06	2.39575e+06	2.77269e+06
M484T32	484.473	31.7353	N-lauroyl-d-erythro-sphinganine	HMDB0011758		Lipids and lipid-like molecules	Sphingolipids	Ceramides	6.76535e+06	7.06509e+06	6.80775e+06	1.16709e+07	1.10273e+07	9.83617e+06	1.20609e+07	1.06211e+07	1.25161e+07	1.48134e+07	14694734	1.21076e+07
M648T175	647.513	175.294	N-lauroyl-d-erythro-sphingosylphosphorylcholine	HMDB0012096		Lipids and lipid-like molecules	Sphingolipids	Phosphosphingolipids	834471	926457	774728	905601	864902	923529	764857	767689	806900	928163	1.00316e+06	896657
M270T108	270.208	107.841	N-lauroylsarcosine			Organic acids and derivatives	Carboxylic acids and derivatives	Amino acids, peptides, and analogues	161209	188308	276366	167604	128662	164341	74491.7	106564	309272	114735	380683	318441
M144T422	144.066	422.459	N-methyl-l-glutamic acid	HMDB0062660	C01046	Organic acids and derivatives	Carboxylic acids and derivatives	Amino acids, peptides, and analogues	11248225	1.48355e+07	1.34163e+07	7.48088e+06	9.19688e+06	9.00339e+06	9.17123e+06	1.04973e+07	1.0447e+07	9.97451e+06	1.10749e+07	11465779
M121T33_1	121.065	32.9931	N-methyltyramine	HMDB0003633	C02442	Benzenoids	Benzene and substituted derivatives	Phenethylamines	925295	1.33357e+06	3.18263e+06	2.02879e+06	2.43815e+06	527073	731701	1.62347e+06	1.45489e+06	2.27968e+06	2.08861e+06	3.99599e+06
M513T32	512.504	32.2914	N-myristoylsphinganine	HMDB0011759		Lipids and lipid-like molecules	Sphingolipids	Ceramides	4.3164e+07	4.74616e+07	4.70466e+07	7.17789e+07	6.95219e+07	5.52176e+07	61180459	5.7359e+07	6.65465e+07	7.48784e+07	8.4725e+07	6.81907e+07
M814T169_2	813.684	168.994	N-nervonoyl-d-erythro-sphingosylphosphorylcholine	HMDB0012107		Lipids and lipid-like molecules	Sphingolipids	Phosphosphingolipids	377491306	451856055	348567036	306331842	278847277	261157531	254319890	258205859	214545703	320842077	327400569	292989876
M403T389	403.152	389.069	Nobiletin	HMDB0029540	C10112	Phenylpropanoids and polyketides	Flavonoids	O-methylated flavonoids	480180	621985	1.15572e+06	599840	1.16613e+06	588685	654851	781840	769317	501084	588589	1.05277e+06
M270T120	270.315	119.701	N-octadecylamine	HMDB0029586		Organic nitrogen compounds	Organonitrogen compounds	Amines	3.73288e+07	4.74265e+07	6.08368e+07	3.36873e+07	3.2329e+07	3.98343e+07	4.09337e+07	32436296	3.20181e+07	3.56163e+07	3.98039e+07	3.82347e+07
M352T187	352.285	187.446	N-oleoyl-l-serine			Organic acids and derivatives	Carboxylic acids and derivatives	Amino acids, peptides, and analogues	2.1902e+06	1.93518e+06	1.59986e+06	1.2783e+06	1.52166e+06	1.15223e+06	1.12877e+06	1.08695e+06	1233496	2.00077e+06	1.58979e+06	2.05441e+06
M432T28	432.1	28.4675	Nonanamide, n-[(4-hydroxy-2-iodo-5-methoxyphenyl)methyl]-8-methyl-			Benzenoids	Phenols	Methoxyphenols	812315	815110	899265	329664	394881	386268	308928	327907	282025	278822	304182	295809
M157T37	157.123	37.2851	Nonanoic acid	HMDB0000847	C01601	Lipids and lipid-like molecules	Fatty Acyls	Fatty acids and conjugates	1.50958e+07	1.40995e+07	1.59514e+07	1.95982e+07	1.53798e+07	18385313	2.04326e+07	1.5925e+07	1.74287e+07	1.65628e+07	1.57319e+07	1.62004e+07
M219T31	219.174	30.8991	Nootkatone		C17914	Lipids and lipid-like molecules	Prenol lipids	Sesquiterpenoids	4.83709e+06	4.57137e+06	4.19301e+06	3.9389e+06	3.02751e+06	4.27031e+06	4.04417e+06	3.58338e+06	4.246e+06	2.88414e+06	4.63103e+06	3.78146e+06
M130T336	130.062	335.733	Norleucine	HMDB0001645	C01933	Organic acids and derivatives	Carboxylic acids and derivatives	Amino acids, peptides, and analogues	304847	249846	266821	367558	491342	452018	488776	665753	637075	509811	663538	491611
M537T33	536.505	33.2464	N-palmitoyl-d-sphingosine	HMDB0004949		Lipids and lipid-like molecules	Sphingolipids	Ceramides	7.79009e+06	11500583	1.06968e+07	1.7783e+07	2.04376e+07	1.61568e+07	11109915	1.47836e+07	1.22451e+07	1.72562e+07	1.73112e+07	1.72478e+07
M521T181	520.509	180.887	N-Palmitoylsphingosine						8.40965e+06	1.14384e+07	7.5337e+06	7.56609e+06	6.02675e+06	6.76695e+06	5.22028e+06	4.77306e+06	4.42491e+06	7.70737e+06	12069644	9.51938e+06
M569T34	568.567	34.2729	N-stearoylsphinganine	HMDB0011761		Lipids and lipid-like molecules	Sphingolipids	Ceramides	3.81997e+07	3.82165e+07	4.09512e+07	3.16408e+07	4.36667e+07	3.59233e+07	2.92709e+07	2.85406e+07	1.68834e+07	2.44329e+07	1.73455e+07	1.73178e+07
M565T33	564.536	33.2726	N-Stearoylsphingosine (Ceramide C18)	HMDB0004950					286652	273296	243280	473374	500815	499560	246383	396384	201480	439816	430373	480158
M857T148	856.716	147.815	N-Tetracosanoyl-4-sphingenyl-1-O-phosphorylcholine						7.31449e+06	6.7144e+06	5.28708e+06	3.21986e+06	3.85669e+06	4.48918e+06	6.17733e+06	6.35148e+06	3.33675e+06	1.00137e+07	6.32107e+06	4.77256e+06
M631T82	630.619	81.5344	N-tetracosenoyl-4-sphingenine	HMDB0004953		Lipids and lipid-like molecules	Sphingolipids	Ceramides	1.00291e+07	1.0272e+07	9.04103e+06	1.23122e+07	1.19734e+07	1.19993e+07	1.35111e+07	1.06937e+07	1.03076e+07	1.94056e+07	1.23165e+07	1.35786e+07
M252T153	252.207	152.583	N-undecanoyl-l-homoserine lactone			Organic acids and derivatives	Carboxylic acids and derivatives	Amino acids, peptides, and analogues	2.33081e+06	1.4112e+06	2.43198e+06	2.45077e+06	2.49334e+06	1.75322e+06	3.07455e+06	3.06596e+06	3.35429e+06	3.54234e+06	1.74114e+06	2.47099e+06
M148T356	148.043	356.26	O-acetyl-l-serine	HMDB0003011	C00979	Organic acids and derivatives	Carboxylic acids and derivatives	Amino acids, peptides, and analogues	10305503	1.09645e+07	1.2099e+07	7.73939e+06	1.00443e+07	1.06335e+07	1.01757e+07	1.35307e+07	1.30208e+07	9.76882e+06	8.84109e+06	1.06833e+07
M477T373	477.213	373.466	Obacunone		C08775	Lipids and lipid-like molecules	Prenol lipids	Triterpenoids	170722	322011	274311	116659	231595	157396	250296	426145	511569	262766	145475	216085
M283T37_2	283.264	36.6594	Octadecanoic acid	HMDB0000827	C01530	Lipids and lipid-like molecules	Fatty Acyls	Fatty acids and conjugates	590620163	743128123	828023472	863658342	632122539	595744326	393724111	482706453	411675369	682016862	699019671	540845133
M393T90	393.21	90.1621	Octaethylene glycol	HMDB0094680		Organic oxygen compounds	Organooxygen compounds	Ethers	849734	1.33265e+06	1.24935e+06	2.26226e+06	104994	969203	777420	759248	836728	2.10756e+06	536165	1.46781e+06
M143T63_2	143.108	62.646	Octanoic acid	HMDB0000482	C06423	Lipids and lipid-like molecules	Fatty Acyls	Fatty acids and conjugates	3.40326e+06	1.59953e+06	1.87725e+06	6.16963e+06	9.1862e+06	7.54983e+06	1.23516e+07	6.99668e+06	9.63048e+06	6.67306e+06	8.80893e+06	8.00007e+06
M360T192	360.16	192.029	Ofloxacin	HMDB0015296	C07321	Organoheterocyclic compounds	Quinolines and derivatives	Quinoline carboxylic acids	271551	514146	425610	155081	369070	208750	315318	503125	435557	316167	170045	389086
M265T89	265.272	89.1123	Oleamide	HMDB0002117	C19670	Lipids and lipid-like molecules	Fatty Acyls	Fatty amides	1.55821e+06	3.26835e+06	4.77415e+06	4.32723e+06	4.72604e+06	3.79796e+06	5.55001e+06	3.22547e+06	5.05908e+06	7.1998e+06	5.1837e+06	6.54859e+06
M281T37_2	281.249	36.6693	Oleic acid	HMDB0000207	C00712	Lipids and lipid-like molecules	Fatty Acyls	Fatty acids and conjugates	434196153	673540569	611570948	685752499	810868973	735021381	736903223	809489860	765664860	640410255	762584358	662923442
M426T163	426.358	163.214	Oleoyl-l-carnitine	HMDB0005065		Lipids and lipid-like molecules	Fatty Acyls	Fatty acid esters	2.56611e+06	2.27105e+06	8.30363e+06	2.62378e+06	3.33185e+06	4.49865e+06	3.73513e+06	4.25266e+06	9.49354e+06	2.68518e+06	33075030	5.18347e+06
M774T30	773.534	30.229	Oligomycin a		C11311				982151	873069	1.15147e+06	846806	857651	935760	1.63124e+06	660228	1.04807e+06	1.01464e+06	502343	517586
M236T195	236.033	195.226	Omethoate		C18662	Organic acids and derivatives	Carboxylic acids and derivatives	Carboxylic acid derivatives	876273	943545	1.35535e+06	516004	792173	608028	665796	932455	671902	626205	613420	582563
M262T455	262.051	455.373	O-phosphotyrosine	HMDB0006049	C06501	Organic acids and derivatives	Carboxylic acids and derivatives	Amino acids, peptides, and analogues	195224731	219552348	210694832	156696093	245288564	196941194	267774485	305828358	280991803	238928065	226437935	276834411
M364T60	364.261	60.3826	Opipramol			Organoheterocyclic compounds	Benzazepines	Dibenzazepines	2.09867e+06	6.0822e+06	2.15209e+06	2.09986e+06	5.71493e+06	2.81202e+06	5.30457e+06	1.55922e+06	4.22055e+06	3.00616e+06	3.46426e+06	2.96113e+06
M123T164	122.976	164.259	Orcinol		C00727	Benzenoids	Phenols	Benzenediols	4.56818e+06	6.77369e+06	5.22197e+06	2.87741e+06	3.44189e+06	4.05001e+06	5.01031e+06	1.16845e+07	4.21339e+06	3.43582e+06	3.35762e+06	6.44631e+06
M297T27_1	297.153	27.2959	Ostruthin		C09281	Lipids and lipid-like molecules	Prenol lipids	Terpene lactones	1.02737e+07	8.23906e+06	7.44767e+06	23852201	1.47331e+07	2.51878e+07	1.70894e+07	1.35145e+07	1.36704e+07	1.65967e+07	1.42431e+07	2.20816e+07
M220T415	220.067	415.036	O-succinyl-l-homoserine		C01118	Organic acids and derivatives	Carboxylic acids and derivatives	Amino acids, peptides, and analogues	288103	375295	612020	325573	300524	321807	335930	365529	598634	347069	295398	397052
M242T378	242.049	377.955	Oxamyl		C18419	Organic acids and derivatives	Carboxylic acids and derivatives	Carboxylic acid derivatives	1.16237e+06	1.05326e+06	1.73415e+06	704609	1.11388e+06	922183	1.20415e+06	1.28284e+06	1.91983e+06	1.12158e+06	1.16328e+06	1.18985e+06
M307T35	307.227	35.0525	Oxandrolone	HMDB0014759	C07346	Lipids and lipid-like molecules	Steroids and steroid derivatives	Steroid lactones	2.79007e+06	5.27328e+06	2.27268e+06	3.64337e+06	2.34002e+06	4.82466e+06	3.9054e+06	4.48006e+06	4.37833e+06	4.26923e+06	2.97291e+06	3.67796e+06
M236T636	236.092	636.284	Oxcarbazepine	HMDB0014914	C07492	Organoheterocyclic compounds	Benzazepines	Dibenzazepines	524284	584472	530409	475372	582677	446037	544876	563362	545772	576924	477731	533486
M262T496	262.051	496.179	Oxolinic acid		C11342	Organoheterocyclic compounds	Quinolines and derivatives	Quinoline carboxylic acids	6.61964e+06	7.75608e+06	6.45725e+06	5.72372e+06	6.42692e+06	6.36026e+06	6.64442e+06	1.08575e+07	8.17104e+06	6.17455e+06	6.65439e+06	8.94575e+06
M151T254	151.026	254.001	Oxypurinol	HMDB0000786	C07599	Organoheterocyclic compounds	Imidazopyrimidines	Purines and purine derivatives	741672	696470	942479	506897	603641	576884	589067	601699	738958	579083	692102	598643
M256T63	256.263	62.9175	Palmitamide	HMDB0012273		Lipids and lipid-like molecules	Fatty Acyls	Fatty amides	9.23496e+06	8.99003e+06	8.04331e+06	1.64841e+07	6.79371e+06	9.20498e+06	9.98964e+06	8.16952e+06	9.07156e+06	1.11887e+07	1.45062e+07	8.29456e+06
M255T37_2	255.233	36.7052	Palmitic acid	HMDB0000220	C00249	Lipids and lipid-like molecules	Fatty Acyls	Fatty acids and conjugates	402530546	865565797	915706604	694648488	886794498	820916406	509619997	574304555	502361613	869709426	939128271	851282314
M280T146	280.263	145.785	Palmitoleoyl ethanolamide	HMDB0013648		Organic nitrogen compounds	Organonitrogen compounds	Amines	1.39506e+06	2.30104e+06	1.93057e+06	4.63003e+06	2.97431e+06	3.16721e+06	3.7509e+06	3.36292e+06	3.65608e+06	4.2862e+06	3.43495e+06	4.68709e+06
M413T587	413.267	587.179	Palmitoyl 3-carbacyclic phosphatidic acid			Lipids and lipid-like molecules	Fatty Acyls	Fatty acid esters	768607	799772	739982	745594	711499	761013	769279	753271	753682	749621	753738	733294
M704T172_2	703.575	171.744	Palmitoyl sphingomyelin	HMDB0061712		Lipids and lipid-like molecules	Sphingolipids	Phosphosphingolipids	1111867052	1325746959	1096567731	1098879198	931125733	859502565	769585970	809020935	777543991	1053468346	1146905747	1055361087
M330T136	330.279	135.887	Palmitoylserinol	HMDB0013654		Lipids and lipid-like molecules	Fatty Acyls	Fatty amides	1.88767e+06	2.10654e+06	3.42051e+06	2.30637e+06	2.41044e+06	1.29853e+06	2.17687e+06	2.86264e+06	1.22128e+06	2.5247e+06	2.17323e+06	1.55975e+06
M277T68	277.123	68.2977	Pantetheine	HMDB0003426	C00831	Organic acids and derivatives	Carboxylic acids and derivatives	"Amino acids, peptides, and analogues"	6.29265e+06	4.78998e+06	7.37277e+06	3.21807e+06	3.21754e+06	4.24902e+06	2.53848e+06	4.88031e+06	5.76788e+06	2.39754e+06	5.45509e+06	3.48641e+06
M220T269_1	220.118	268.52	Pantothenic acid	HMDB0000210	C00864	Organic acids and derivatives	Carboxylic acids and derivatives	Amino acids, peptides, and analogues	9.31094e+06	10487155	1.09077e+07	725614	1.12612e+06	1.18554e+06	1.31572e+06	1.71201e+06	1.75492e+06	1.79157e+06	1.0291e+06	2.16482e+06
M231T53	231.12	52.8118	Parthenolide		C07609	Lipids and lipid-like molecules	Prenol lipids	Terpene lactones	5.30743e+06	5.06026e+06	4.69362e+06	5.91176e+06	4.15375e+06	5.86315e+06	7.17056e+06	5.44254e+06	6.07742e+06	6.67259e+06	4.98041e+06	6.17938e+06
M814T136	813.616	136.223	Pc 17:0-18:1-d5						1.8666e+06	1.82783e+06	1.81593e+06	1.96586e+06	2.50462e+06	2.02646e+06	1.76234e+06	1.84691e+06	2.17099e+06	2.0618e+06	2964946	3.1163e+06
M737T145	736.516	144.858	Pc 28:0			Lipids and lipid-like molecules	Glycerophospholipids	Glycerophosphocholines	4.94777e+06	5.44289e+06	4.54547e+06	1.02844e+07	1.16253e+07	9.8443e+06	7.61846e+06	9.40501e+06	9.37962e+06	1.116e+07	1.16479e+07	9.8608e+06
M763T143	762.532	143.472	Pc 30:1			Lipids and lipid-like molecules	Glycerophospholipids	Glycerophosphocholines	1.27e+07	6.89708e+06	5.91942e+06	8.97814e+06	1.15094e+07	1.12798e+07	1.36878e+07	7.92383e+06	8.07123e+06	7.85463e+06	9.14251e+06	8.37348e+06
M791T142	790.563	141.528	Pc 32:1			Lipids and lipid-like molecules	Glycerophospholipids	Glycerophosphocholines	3.72859e+07	7.8093e+07	4.22086e+07	4.07086e+07	73876820	7.37614e+07	3.68956e+07	3.48038e+07	3.7627e+07	3.5734e+07	4.09325e+07	3.64684e+07
M819T140	818.592	139.52	Pc 34:1			Lipids and lipid-like molecules	Glycerophospholipids	Glycerophosphocholines	104109220	132006705	112938986	9.00321e+07	103299426	9.78649e+07	7.87687e+07	7.43278e+07	7.91989e+07	9.37858e+07	100126998	8.99303e+07
M845T138	844.608	137.542	Pc 36:2	HMDB0000593		Lipids and lipid-like molecules	Glycerophospholipids	Glycerophosphocholines	3.91223e+07	5.04943e+07	4.98477e+07	3.92772e+07	4.48275e+07	4.22625e+07	4.0056e+07	3.49642e+07	38247261	3.81858e+07	3.84499e+07	3.98387e+07
M841T136	840.576	136.191	Pc 36:4			Lipids and lipid-like molecules	Glycerophospholipids	Glycerophosphocholines	7.68229e+06	8.1008e+06	7.59167e+06	7.49877e+06	9.11497e+06	8.74591e+06	7.74192e+06	7.37937e+06	7.12497e+06	7.57057e+06	7.45639e+06	7.82167e+06
M873T137	872.641	136.876	Pc 38:2			Lipids and lipid-like molecules	Glycerophospholipids	Glycerophosphocholines	3.16536e+06	4.51187e+06	3.7745e+06	3.23413e+06	3.72086e+06	3.41371e+06	3.14715e+06	3.42174e+06	2.84274e+06	3.43972e+06	3.1088e+06	4.05673e+06
M867T38	866.592	37.8922	Pc 38:5			Lipids and lipid-like molecules	Glycerophospholipids	Glycerophosphocholines	1.93908e+06	1.89544e+06	1.95145e+06	1.51321e+06	2.00385e+06	1.32347e+06	1.35688e+06	1.31208e+06	1.28367e+06	1.52901e+06	1.62832e+06	1.49294e+06
M865T135	864.576	134.868	Pc 38:6			Lipids and lipid-like molecules	Glycerophospholipids	Glycerophosphocholines	4.08585e+06	4.41584e+06	3.95453e+06	4.09238e+06	4.38321e+06	4.41316e+06	4.38745e+06	4.01893e+06	4.02398e+06	4.10952e+06	4.04593e+06	4.39279e+06
M776T39	775.604	38.8046	PC(16:0/16:0)	HMDB0000564/HMDB0007878/HMDB0007879/HMDB0007880/HMDB0007882/HMDB0007884/HMDB0007886/HMDB0007887/HMDB0007897/HMDB0007898/HMDB0007911/HMDB0007912/HMDB0007913/HMDB0007914/HMDB0007936/HMDB0007937/HMDB0007938/HMDB0007939/HMDB0007940/HMDB0007958/HMDB0007959/HMDB0007960/HMDB0007961/HMDB0007964/HMDB0007966/HMDB0007967/HMDB0007981/HMDB0007982/HMDB0007983/HMDB0007984/HMDB0007985/HMDB0008002/HMDB0008003/HMD…	C00157	Lipids and lipid-like molecules	Glycerophospholipids	Glycerophosphocholines	1.8331e+07	1.81542e+07	2.17779e+07	1.32542e+07	1.15836e+07	1.17957e+07	1.60413e+07	1.25652e+07	1.37513e+07	1.50648e+07	1.50502e+07	1.58216e+07
M688T146	688.493	145.899	Pe 32:1			Lipids and lipid-like molecules	Glycerophospholipids	Glycerophosphoethanolamines	6.97653e+07	7.55448e+07	71350630	119332666	112386596	111437301	103688894	107662086	110867475	115714008	127716147	120512824
M717T125	716.525	125.451	Pe 34:1			Lipids and lipid-like molecules	Glycerophospholipids	Glycerophosphoethanolamines	5.0013e+07	5.0628e+07	5.27879e+07	5.64952e+07	7.12277e+07	4.88426e+07	56273022	1.9361e+07	1.84526e+07	6.80341e+07	2.27083e+07	6.10055e+07
M715T126	714.509	126.31	Pe 34:2			Lipids and lipid-like molecules	Glycerophospholipids	Glycerophosphoethanolamines	2.81202e+07	3.11874e+07	9.8654e+06	3.36953e+07	3.75e+07	1.63851e+07	3.00373e+07	3.11828e+07	3.05118e+07	1.32818e+07	32404746	3.40732e+07
M745T145	744.555	145.477	Pe 36:1			Lipids and lipid-like molecules	Glycerophospholipids	Glycerophosphoethanolamines	211097067	240723258	210674391	204562410	205712290	213955050	214160674	204102741	206365633	210730875	224913124	229288716
M743T143	742.54	143.418	Pe 36:2			Lipids and lipid-like molecules	Glycerophospholipids	Glycerophosphoethanolamines	258754305	288584101	250523516	306790942	305577065	299065154	266821445	272191324	260164018	306413952	307379856	310138639
M739T141	738.508	140.855	Pe 36:4			Lipids and lipid-like molecules	Glycerophospholipids	Glycerophosphoethanolamines	5.04022e+07	5.11096e+07	4.77894e+07	70624804	7.06597e+07	6.47565e+07	6.23113e+07	5.66595e+07	6.04777e+07	6.94219e+07	7.10093e+07	6.85852e+07
M789T37	788.521	37.1263	Pe 40:7			Lipids and lipid-like molecules	Glycerophospholipids	Glycerophosphoethanolamines	1.22519e+07	1.3954e+07	11073508	1.41693e+07	12884744	1.34408e+07	1.37975e+07	1.34039e+07	1.28877e+07	1.72558e+07	1.30369e+07	1.31483e+07
M779T35	778.515	34.6225	Pe(16:0/19,20-epdpe)			Lipids and lipid-like molecules	Glycerophospholipids	Glycerophosphoethanolamines	2.22897e+07	2.22211e+07	2.08977e+07	2.41973e+07	2.04675e+07	1.76351e+07	1.69749e+07	1.76913e+07	17786257	2.57753e+07	27854024	2.38658e+07
M791T35	790.534	35.2798	Pe(18:1e/7-hdohe)			Lipids and lipid-like molecules	Glycerophospholipids	Glycerophosphoethanolamines	4.1694e+06	4.54147e+06	3.05051e+06	6.9835e+06	3.76514e+06	6.89997e+06	5.22709e+06	6.13594e+06	3.01672e+06	9.05656e+06	4.62455e+06	5.994e+06
M241T37_2	241.217	36.681	Pentadecanoic acid	HMDB0000826	C16537	Lipids and lipid-like molecules	Fatty Acyls	Fatty acids and conjugates	5.55855e+06	6.57602e+06	5.1141e+06	1.0757e+07	5.69488e+06	4.76755e+06	5.60123e+06	10942279	5.61891e+06	1.07997e+07	6.52959e+06	1.05075e+07
M1176T29	1175.78	29.3074	Pentaerythritol tetrakis(3,5-di-tert-butyl-4-hydroxyhydrocinnamate)			Organic acids and derivatives	Carboxylic acids and derivatives	Tetracarboxylic acids and derivatives	406687	697277	369313	396666	444940	450149	370828	437848	450467	517133	506912	585028
M239T69	239.149	69.0833	Pentaethylene glycol			Organic oxygen compounds	Organooxygen compounds	Ethers	1.83166e+07	1.80749e+07	4.21509e+07	1.6857e+07	5.4134e+06	1.05245e+07	1.90958e+07	8.02664e+06	9.67067e+06	9.12228e+06	1.68553e+07	11871742
M324T637	324.147	636.691	Pentamidine	HMDB0014876	C07420				1.7647e+06	1.71221e+06	1.65327e+06	1.68509e+06	1.77608e+06	1.6777e+06	1.61504e+06	1.76268e+06	1.73268e+06	41715.6	1.60865e+06	1.58934e+06
M286T248	286.036	247.651	Pentoxazone		C18592				4.84774e+06	4.527e+06	5.96483e+06	3.05652e+06	4.48428e+06	4.41627e+06	4.48108e+06	6.50952e+06	5.95213e+06	4.03189e+06	4.21686e+06	4.63444e+06
M307T425	306.852	424.664	Perchloroterephthalic acid	HMDB0029628		Benzenoids	Benzene and substituted derivatives	Benzoic acids and derivatives	1.19266e+07	1.04656e+07	1.02604e+07	1.70379e+07	1.38853e+07	14146387	1.55135e+07	1.12192e+07	1.32356e+07	17497661	1.26919e+07	1.26069e+07
M369T521	369.25	520.608	Perindopril	HMDB0014928	C07706	Organic acids and derivatives	Carboxylic acids and derivatives	Amino acids, peptides, and analogues	3.36729e+06	3.77773e+06	3.70668e+06	1.97191e+06	2.33104e+06	2.31433e+06	2.31285e+06	2.64667e+06	2.63953e+06	2.17765e+06	2.64791e+06	2.59768e+06
M235T275	235.075	275.437	Perseitol	HMDB0033750	C08255	Organic oxygen compounds	Organooxygen compounds	Carbohydrates and carbohydrate conjugates	7.49974e+06	6.52816e+06	7.24178e+06	4.69271e+06	1.01177e+07	4.98853e+06	1.14102e+07	1.50765e+07	1.41798e+07	1.0561e+07	5.14381e+06	11751177
M722T86	721.503	85.8333	Pg 32:0			Lipids and lipid-like molecules	Glycerophospholipids	Glycerophosphoglycerols	3.58556e+07	4.26183e+07	3.41506e+07	2.29036e+07	1.85725e+07	3.29226e+07	3.78082e+07	2.05452e+07	1.94392e+07	3.678e+07	5.65364e+07	4.09423e+07
M719T35	719.487	35.2974	Pg 32:1			Lipids and lipid-like molecules	Glycerophospholipids	Glycerophosphoglycerols	3.57292e+07	3.77053e+07	4.11164e+07	3.62456e+07	3.34309e+07	2.9845e+07	3.47639e+07	3.72422e+07	3.66394e+07	3.59015e+07	4.62169e+07	4.25421e+07
M748T36	747.518	35.6396	Pg 34:1			Lipids and lipid-like molecules	Glycerophospholipids	Glycerophosphoglycerols	196126655	236853017	220919387	232448449	198346627	175972779	193539175	233054746	209037548	236177321	287816539	280333162
M774T35	773.534	34.5155	Pg 36:2			Lipids and lipid-like molecules	Glycerophospholipids	Glycerophosphoglycerols	153311490	162597518	164083781	133487400	114573278	126363789	131891985	129966818	132947278	144859797	150035738	145586552
M794T34	793.502	34.0902	Pg 38:6			Lipids and lipid-like molecules	Glycerophospholipids	Glycerophosphoglycerols	1.8132e+07	19100332	2.05265e+07	2.14202e+07	1.81255e+07	1.98427e+07	2.33076e+07	1.97705e+07	2.18277e+07	2.14585e+07	2.14154e+07	2.24525e+07
M820T34	819.518	34.0062	Pg 40:7			Lipids and lipid-like molecules	Glycerophospholipids	Glycerophosphoglycerols	66641881	6.68326e+07	7.77208e+07	6.90588e+07	5.87988e+07	6.50663e+07	7.67705e+07	6.90556e+07	6.95345e+07	6.81212e+07	6.22636e+07	7.54264e+07
M866T33	865.503	33.2191	Pg 44:12			Lipids and lipid-like molecules	Glycerophospholipids	Glycerophosphoglycerols	2.81022e+07	26908947	3.12119e+07	2.74006e+07	2.3877e+07	2.61808e+07	29433661	2.49483e+07	2.74747e+07	2.59361e+07	2.30743e+07	2.8533e+07
M221T22_2	221.085	22.0694	Phe-gly		C18481	Organic acids and derivatives	Carboxylic acids and derivatives	Amino acids, peptides, and analogues	331340	504976	256050	248658	182280	212384	190699	222749	220088	226225	259683	180484
M597T237	597.306	236.557	Phe-met-arg-phe-amide			Organic acids and derivatives	Carboxylic acids and derivatives	Amino acids, peptides, and analogues	2.27606e+06	1.75189e+06	1.28231e+06	2.10481e+06	1.6751e+06	2.15435e+06	2.09567e+06	1.84072e+06	1.75748e+06	3.72314e+06	2.51217e+06	1.84924e+06
M192T180	192.067	180.493	Phenaceturic acid	HMDB0000821	C05598	Organic acids and derivatives	Carboxylic acids and derivatives	Amino acids, peptides, and analogues	431332	445014	429726	539151	354874	407688	383747	368127	428082	629408	450288	903200
M103T248	103.054	248.268	Phenylacetaldehyde	HMDB0006236	C00601	Benzenoids	Benzene and substituted derivatives	Phenylacetaldehydes	4.15634e+06	4.15826e+06	5.40328e+06	2.28421e+06	3.91041e+06	3.32314e+06	4.04668e+06	5.94572e+06	6.03373e+06	3.51805e+06	3.57225e+06	3.87639e+06
M265T608	265.116	607.617	Phenylacetyl-l-glutamine	HMDB0006344	C04148	Organic acids and derivatives	Carboxylic acids and derivatives	Amino acids, peptides, and analogues	7.72495e+06	7.60174e+06	7.52318e+06	8.03048e+06	7.27302e+06	8.8897e+06	7.78206e+06	5.71002e+06	6.72683e+06	8.75897e+06	7.00704e+06	8.78335e+06
M163T130	163.04	129.555	Phenylpyruvate	HMDB0000205	C00166	Benzenoids	Benzene and substituted derivatives	Phenylpyruvic acid derivatives	855856	736835	1.52658e+06	725288	380499	942191	957909	915924	979267	794365	859572	845905
M327T183	327.135	183.185	Phe-tyr			Organic acids and derivatives	Carboxylic acids and derivatives	Amino acids, peptides, and analogues	1.4701e+06	1.54197e+06	4.00574e+06	320281	1.07697e+06	909301	1.42592e+06	1.21837e+06	1.56865e+06	518490	1.08278e+06	1552408
M433T61	433.332	61.137	Philanthotoxin 74			Organic acids and derivatives	Carboxylic acids and derivatives	Amino acids, peptides, and analogues	12083.9	5942.78	5864.81	11870.3	6151.02	12715	16810.9	9193.84	6603.02	9529.07	18148.3	18670.5
M540T189_2	540.368	188.592	Phosphatidylcholine lyso alkyl 16:0			Lipids and lipid-like molecules	Glycerophospholipids	Glycerophosphocholines	287580	435911	296583	556824	405320	649181	302954	115380	102287	486018	455590	430004
M367T456	367.139	455.664	Phosphocholine	HMDB0001565	C00588	Organic nitrogen compounds	Organonitrogen compounds	Quaternary ammonium salts	195542791	229298508	195700229	180815926	221605654	236043125	250200394	255040375	198441689	236225877	302655803	375508410
M167T448	166.975	447.636	Phosphoenolpyruvate	HMDB0000263	C00074	Organic acids and derivatives	Organic phosphoric acids and derivatives	Phosphate esters	4.20949e+06	4.97961e+06	4.8409e+06	3.58133e+06	1.42637e+07	7.17597e+06	1.50802e+07	12385309	1.75585e+07	1.53691e+07	5.38356e+06	9.90429e+06
M97T421_1	96.9601	421.105	Phosphoric acid	HMDB0000973	C00009	Homogeneous non-metal compounds	Non-metal oxoanionic compounds	Non-metal phosphates	186573542	189119288	200435011	192158365	191222099	196476274	201209140	190613023	207913789	198705803	202143085	199640434
M369T433	369.022	433.243	Phosphoserine	HMDB0001721		Organic acids and derivatives	Carboxylic acids and derivatives	Amino acids, peptides, and analogues	1.30483e+06	1.2039e+06	4.06681e+06	573560	1.57377e+06	704019	824155	810613	1.70411e+06	1.1375e+06	1.36693e+06	555960
M299T301	299.044	300.883	Phoxim		C18757				20313993	1.83973e+07	1.94537e+07	1.77495e+07	36506715	2.15478e+07	3.0345e+07	3.68916e+07	4.03355e+07	2.32353e+07	2.03962e+07	3.27787e+07
M318T65	318.3	65.195	Phytosphingosine	HMDB0004610	C12144	Organic nitrogen compounds	Organonitrogen compounds	Amines	1.97004e+07	1.52911e+07	1.77409e+07	2.35913e+07	1.33082e+07	21150948	1.94244e+07	1.43185e+07	15806671	2.38316e+07	2.22381e+07	1.73835e+07
M834T167	833.52	166.928	Pi 34:2			Lipids and lipid-like molecules	Glycerophospholipids	Glycerophosphoinositols	3.17476e+06	3.84515e+06	3.43307e+06	2.90204e+06	1.99905e+06	2.77962e+06	2.0811e+06	1.90594e+06	1.92469e+06	2.72659e+06	3.05191e+06	3.15311e+06
M848T189	847.533	188.589	Pi 35:2			Lipids and lipid-like molecules	Glycerophospholipids	Glycerophosphoinositols	3.6282e+06	3.65394e+06	3.84874e+06	3.08862e+06	3.29108e+06	3.13037e+06	3.11246e+06	4.05646e+06	4.11537e+06	3.72538e+06	3.12434e+06	3.40726e+06
M864T189	863.564	189.215	Pi 36:1			Lipids and lipid-like molecules	Glycerophospholipids	Glycerophosphoinositols	43556464	4.69206e+07	4.35114e+07	3.75809e+07	4.42139e+07	37215175	3.82866e+07	5.21542e+07	5.66807e+07	4.99461e+07	4.48783e+07	4.61514e+07
M862T188_1	861.55	188.416	Pi 36:2			Lipids and lipid-like molecules	Glycerophospholipids	Glycerophosphoinositols	7.60444e+07	7.6959e+07	7.73086e+07	6.4452e+07	8.15212e+07	6.76602e+07	7.37563e+07	8.84653e+07	94644200	8.62791e+07	7.26208e+07	8.46641e+07
M860T150	859.534	150.1	Pi 36:3						3.64105e+06	5.11581e+06	3.79387e+06	3.51128e+06	2.14352e+06	3.59551e+06	3.33265e+06	4.08781e+06	3.80217e+06	3.8214e+06	3.67789e+06	3.4594e+06
M858T186	857.519	185.919	Pi 36:4			Lipids and lipid-like molecules	Glycerophospholipids	Glycerophosphoinositols	3.22448e+07	3.27625e+07	36356539	3.28456e+07	5.54162e+07	34241753	4.90557e+07	32706792	3.54432e+07	4.9903e+07	3.82151e+07	4.90655e+07
M856T148	855.503	148.151	Pi 36:5			Lipids and lipid-like molecules	Glycerophospholipids	Glycerophosphoinositols	1.03742e+06	878737	850630	980616	624683	1.19473e+06	662669	814393	760336	1.70741e+06	1.01958e+06	1.45788e+06
M886T169	885.548	168.973	Pi 38:4			Lipids and lipid-like molecules	Glycerophospholipids	Glycerophosphoinositols	1.63266e+06	1.86636e+06	1.83801e+06	2.24776e+06	1.39055e+06	1.75721e+06	1.64251e+06	1.28832e+06	1.37971e+06	1.65372e+06	1.8741e+06	1.78362e+06
M884T185_1	883.534	184.611	Pi 38:5			Lipids and lipid-like molecules	Glycerophospholipids	Glycerophosphoinositols	6.05832e+07	6.13772e+07	6.80037e+07	4.81052e+07	7.01729e+07	5.55395e+07	6.86955e+07	3.82543e+07	4.0656e+07	7.96725e+07	5.62535e+07	77422040
M910T184	909.55	184.31	Pi 40:6			Lipids and lipid-like molecules	Glycerophospholipids	Glycerophosphoinositols	1.16301e+07	1.29593e+07	1.31937e+07	9.26054e+06	12076865	9.86095e+06	12166129	6.84827e+06	6.93077e+06	1.64394e+07	1.16897e+07	1.52457e+07
M902T191	901.541	191.31	Pi(18:0/14,15-eet)			Lipids and lipid-like molecules	Glycerophospholipids	Glycerophosphoinositols	325526	404688	381291	548220	540685	568670	480780	536741	592713	481625	472877	501264
M245T390	245.063	390.413	Piceatannol	HMDB0004215	C05901				1.27007e+06	1.70971e+06	2.0244e+06	2.46078e+06	2.83988e+06	2.69741e+06	3.45874e+06	4.01826e+06	3.97285e+06	3.08861e+06	2.89025e+06	2.76921e+06
M241T445_1	240.916	444.875	Picloram		C14310	Organoheterocyclic compounds	Pyridines and derivatives	Pyridinecarboxylic acids and derivatives	2.02207e+06	1.72593e+06	1.99857e+06	4.68495e+06	1.25002e+06	1.90118e+06	1.57748e+06	969650	972871	1.99597e+06	2.06188e+06	1.48094e+06
M311T24	311.127	24.0065	Picrotin		C09528				456588	636557	406143	795918	313055	494232	604870	505717	496649	529214	545287	514941
M315T582	315.087	582.073	Picrotoxinin	HMDB0002322	C09529				3.28238e+06	3.34482e+06	3.3611e+06	3.35755e+06	3.29997e+06	3.39451e+06	3.27315e+06	3.37981e+06	3.22567e+06	3.16886e+06	3.31735e+06	4.72075e+06
M231T639	231.124	638.975	Pindolol	HMDB0015095	C07445	Organoheterocyclic compounds	Indoles and derivatives	Indoles	6.41552e+06	7.55913e+06	5.74583e+06	3.39742e+06	5.64472e+06	1.24121e+07	3.88169e+06	6.78597e+06	5.14597e+06	3.20685e+06	5.91078e+06	5.82355e+06
M357T27	357.147	26.7472	Pioglitazone	HMDB0015264	C07675				543750	479789	502911	763462	712026	886777	769689	768402	701315	767273	727810	871962
M86T255	86.0965	254.633	Piperidine	HMDB0034301	C01746				3.08495e+07	3.44918e+07	3.6516e+07	2.0316e+07	3.11768e+07	29007766	3.17744e+07	4.38406e+07	4.58121e+07	2.82737e+07	2.66289e+07	3.28371e+07
M273T29	273.127	28.7261	Podocarpic acid		C09171	Lipids and lipid-like molecules	Prenol lipids	Diterpenoids	855691	1.29065e+06	1.60363e+06	1.76596e+06	1.79078e+06	1.17533e+06	2.52628e+06	1.93143e+06	2.58393e+06	2.02393e+06	1.75138e+06	1.56889e+06
M437T579	437.102	579.298	Podofilox	HMDB0015310	C08411	Lignans, neolignans and related compounds	Lignan lactones	Podophyllotoxins	573312	554537	616971	601800	798733	569364	565532	1.4575e+06	542689	713139	600907	1.422e+06
M210T197	210.08	197.02	Porphobilinogen	HMDB0000245	C00931	Organic nitrogen compounds	Organonitrogen compounds	Amines	74288.8	275215	519337	599469	501766	663004	248112	660580	535972	690689	221381	960047
M315T101	315.254	100.624	Pregnenolone	HMDB0000253	C01953	Lipids and lipid-like molecules	Steroids and steroid derivatives	Pregnane steroids	108529	83786.3	125522	524422	574889	526415	331950	333396	434878	342517	386010	330623
M260T213_2	260.186	213.156	Primaquine	HMDB0015219	C07627	Organoheterocyclic compounds	Quinolines and derivatives	Aminoquinolines and derivatives	198566	498192	213770	3.52119e+06	3.64714e+06	4.57198e+06	5.42318e+06	7.06695e+06	3.71937e+06	4.25377e+06	3.06012e+06	6.27227e+06
M469T447	469.158	447.372	Prim-o-glucosylcimifugin			Organoheterocyclic compounds	Benzopyrans	1-benzopyrans	92618.6	168266	73984.5	81408.7	59969.4	120222	49428.5	30669.4	30314	33335.4	106320	117990
M636T135	635.539	134.565	Pristanic acid	HMDB0000795		Lipids and lipid-like molecules	Prenol lipids	Diterpenoids	5.69698e+06	6.94981e+06	6611052	5.11953e+06	5.15193e+06	5.58573e+06	5.80109e+06	6.59271e+06	6.01271e+06	7.34957e+06	5.9614e+06	7.69214e+06
M236T36	236.105	36.05	Probucol	HMDB0015537	C07373	Benzenoids	Benzene and substituted derivatives	Phenylpropanes	7.62495e+06	7.35852e+06	5.12059e+06	7.99578e+06	6.71517e+06	4.96254e+06	5.05614e+06	4.95038e+06	7.05401e+06	6.49696e+06	4.39632e+06	5.69887e+06
M313T83	313.239	83.2865	Progesterone	HMDB0001830	C00410	Lipids and lipid-like molecules	Steroids and steroid derivatives	Pregnane steroids	135442	156946	178791	888193	1047858	1.04063e+06	541108	621088	459550	594142	648075	592770
M229T265	229.155	264.986	Pro-leu			Organic acids and derivatives	Carboxylic acids and derivatives	Amino acids, peptides, and analogues	420833	586712	715486	232836	339877	359326	557812	1.17759e+06	860827	239602	683043	641118
M218T77	218.211	76.7875	Prolintane						4.25555e+07	4.05783e+07	4.06916e+07	6.8732e+07	5.61059e+07	6.42946e+07	7.05705e+07	6.185e+07	152010649	7.10143e+07	6.66282e+07	6.78448e+07
M415T147	415.286	147.094	Propanoic acid, 2-[[4-[2-[[(cyclohexylamino)carbonyl](4-cyclohexylbutyl)amino]ethyl]phenyl]thio]-2-methyl-		C15622	Organosulfur compounds	Thioethers	Aryl thioethers	1.39953e+06	1.48806e+06	1413442	2.08151e+06	2.08593e+06	2.21064e+06	1.47057e+06	1.34343e+06	1.58331e+06	1.36959e+06	1.84179e+06	1.45253e+06
M187T24	187.007	23.7396	Propanoic acid, 3-[[[2-[(aminoiminomethyl)amino]-4-thiazolyl]methyl]thio]-			Organoheterocyclic compounds	Azoles	Thiazoles	210917	360285	406602	563754	546117	439004	904245	604832	748334	754680	572148	642787
M73T383	73.0296	382.861	Propionic acid	HMDB0000237	C00163	Organic acids and derivatives	Carboxylic acids and derivatives	Carboxylic acids	4.51706e+06	5.54447e+06	4.12932e+06	4.07993e+06	4.32958e+06	4.15615e+06	4.48559e+06	4.21952e+06	4.05288e+06	4.18815e+06	4.70491e+06	4.70503e+06
M745T361	745.422	361.346	Prosapogenin a			Lipids and lipid-like molecules	Steroids and steroid derivatives	Steroidal glycosides	1.59592e+06	823040	2.69089e+06	520597	1.3078e+06	811643	807995	1.22893e+06	2.11681e+06	982246	1.32918e+06	658787
M349T27	349.205	27.0815	Prostaglandin d3		C13802	Lipids and lipid-like molecules	Fatty Acyls	Eicosanoids	521433	364188	576498	658011	496573	581149	488729	215635	479872	581052	482921	499174
M339T166	339.253	166.448	Prostaglandin f1.alpha.	HMDB0002685	C06475	Lipids and lipid-like molecules	Fatty Acyls	Eicosanoids	1.0289e+06	940717	880483	1.19223e+06	315960	1.32495e+06	864876	1.08193e+06	405147	1.48957e+06	563212	1.13812e+06
M357T36	357.28	35.8034	Prostaglandin f2.alpha.		C00639	Lipids and lipid-like molecules	Fatty Acyls	Eicosanoids	1.01554e+06	736533	937170	1.34032e+06	1.31437e+06	817665	1.45317e+06	1.33731e+06	1.0485e+06	871751	897564	672559
M364T137	364.261	137.208	Prostaglandin f2.alpha. dimethylamide			Lipids and lipid-like molecules	Fatty Acyls	Eicosanoids	2.38798e+07	3.79157e+07	3.65168e+07	2.41044e+07	3.18312e+07	17943790	3.67634e+07	3.59638e+07	2.07949e+07	4.76009e+07	3.8897e+07	2.3898e+07
M252T369	252.144	369.369	Prosulfocarb		C18760				4.27885e+06	4.46512e+06	4.28506e+06	4.38405e+06	4.12903e+06	4.33596e+06	4.36023e+06	4.46711e+06	4.21675e+06	4.45699e+06	4.44606e+06	4.45408e+06
M344T472	344.059	472.387	Prothioconazole		C18888	Benzenoids	Benzene and substituted derivatives	Halobenzenes	1.84634e+06	2.64322e+06	2.24019e+06	1.5664e+06	2.97598e+06	2.02884e+06	2.62925e+06	4.02823e+06	3.61405e+06	2.29238e+06	2.58001e+06	2.84787e+06
M217T322	217.118	322.263	Pro-thr			Organic acids and derivatives	Carboxylic acids and derivatives	Amino acids, peptides, and analogues	228047	435623	282356	256122	205471	378517	523200	974998	594615	250078	272389	625145
M302T60	302.305	59.5243	Pro-Trp	HMDB0000269	C00836	Organic nitrogen compounds	Organonitrogen compounds	Amines	560805286	513671196	490399574	640663038	418369409	479419742	487436703	405444203	463309752	611890084	554673100	457787829
M789T254	788.547	253.939	Ps 36:1			Lipids and lipid-like molecules	Glycerophospholipids	Glycerophosphoserines	527425	678375	487268	488963	451716	522371	443116	403277	449708	486444	520039	556005
M811T185	810.529	184.606	Ps 38:4			Lipids and lipid-like molecules	Glycerophospholipids	Glycerophosphoserines	5.18741e+06	6.04975e+06	6.10324e+06	5.23717e+06	5.02688e+06	9.62926e+06	7.38804e+06	6.66291e+06	7.16684e+06	5.04915e+06	4.48201e+06	4.98618e+06
M243T238	243.063	238.017	Pseudouridine	HMDB0000767	C02067	Nucleosides, nucleotides, and analogues	Nucleoside and nucleotide analogues		4.41972e+06	2.972e+06	7.03574e+06	2.87902e+06	3.71692e+06	3.33931e+06	2.84643e+06	2.53636e+06	5.4246e+06	2.89312e+06	7.06345e+06	2.56746e+06
M80T64	80.0496	63.56	Pyridine	HMDB0000926	C00747				1.28299e+07	1.39683e+07	1.30648e+07	1.07808e+07	1.29202e+07	1.27037e+07	1.29539e+07	1.21002e+07	12072176	1.10716e+07	1.43532e+07	1.20763e+07
M270T274	270.009	274.031	Pyridoxal phosphate	HMDB0001491	C00018	Organoheterocyclic compounds	Pyridines and derivatives	Pyridine carboxaldehydes	1.43423e+06	1.26362e+06	1.59119e+06	880880	1.1196e+06	1.3269e+06	1172573	2.05731e+06	1.81694e+06	1.11153e+06	1.01158e+06	1.32521e+06
M230T135	230.024	134.871	Pyridoxamine 5-phosphate	HMDB0001555	C00647	Organoheterocyclic compounds	Pyridines and derivatives	Pyridoxamines	580135	298248	321967	451853	360397	487851	446379	2.27522e+06	342469	318830	441265	494185
M170T109	170.081	109.311	Pyridoxine	HMDB0000239	C00314	Organoheterocyclic compounds	Pyridines and derivatives	Pyridoxines	3.02371e+07	3.65884e+07	23828034	2.43713e+07	4.92774e+07	2.81581e+07	54478136	7.54629e+07	7.8826e+07	5.76003e+07	1.86547e+07	6.53677e+07
M355T450_1	354.874	449.519	Pyrophosphate						186018	274295	265358	27958.8	302268	353572	399949	781276	933351	263291	213023	236034
M110T472	110.024	471.732	Pyrrole-2-carboxylic acid	HMDB0004230	C05942	Organoheterocyclic compounds	Pyrroles	Pyrrole carboxylic acids and derivatives	2.19041e+06	3.67072e+06	3.81007e+06	1.43912e+06	4.85608e+06	1.80089e+06	3.96964e+06	8.16652e+06	6.94881e+06	3.69299e+06	2.52315e+06	4.29522e+06
M72T429	72.0808	428.718	Pyrrolidine	HMDB0031641		Organoheterocyclic compounds	Pyrrolidines		3.45065e+06	3.95753e+06	4.14224e+06	2.22138e+06	2.97549e+06	2.61355e+06	2.52577e+06	2.90679e+06	2.89737e+06	2.6244e+06	3.13096e+06	3.26256e+06
M87T136	87.0088	136.214	Pyruvate	HMDB0000243	C00022	Organic acids and derivatives	Keto acids and derivatives	Alpha-keto acids and derivatives	106052613	138604543	6.99861e+07	194998639	108542650	132754868	3.37018e+07	146377387	177136686	100371745	6.00746e+07	8.28215e+07
M179T590	178.984	589.653	Quercetin	HMDB0005794	C00389	Phenylpropanoids and polyketides	Flavonoids	Flavones	1.2562e+07	6.20383e+06	9.46346e+06	1.69019e+07	1.05813e+07	8.68439e+06	1.4012e+07	9.84188e+06	4.01264e+06	3.93335e+06	7.57036e+06	8.17423e+06
M447T26	447.091	25.8071	Quercitrin	HMDB0033751	C01750	Phenylpropanoids and polyketides	Flavonoids	Flavonoid glycosides	9.82514e+06	1.02239e+07	1.10534e+07	4.8935e+06	5.58061e+06	5.34415e+06	5.13492e+06	5.16109e+06	4.48677e+06	4.94003e+06	5.02219e+06	5.12491e+06
M461T606	461.202	606.058	Quinapril	HMDB0015019	C07398	Organic acids and derivatives	Carboxylic acids and derivatives	Amino acids, peptides, and analogues	690557	736186	731840	816036	733873	728234	353939	664927	754597	650303	763910	694082
M242T385	242.001	384.743	Quinclorac		C18806	Organoheterocyclic compounds	Quinolines and derivatives	Quinoline carboxylic acids	2.18794e+06	2.53961e+06	2.45344e+06	1.28873e+06	1.70149e+06	1.56396e+06	1.72353e+06	1.71477e+06	1.53216e+06	1.88287e+06	1.91012e+06	1.86739e+06
M144T40	144.067	39.8761	Quinolin-2-ol		C06415	Organoheterocyclic compounds	Quinolines and derivatives	Quinolones and derivatives	250809	164712	210721	183247	227779	138553	152420	219776	186101	282759	404521	187242
M122T215	122.025	214.649	Quinolinate	HMDB0000232	C03722	Organoheterocyclic compounds	Pyridines and derivatives	Pyridinecarboxylic acids and derivatives	6.99579e+06	7.86413e+06	7.73055e+06	3.25804e+06	4.5735e+06	4.35483e+06	4.36592e+06	5.49159e+06	5.56387e+06	4.22057e+06	5.50731e+06	4.54788e+06
M343T406_2	343.07	406.306	Quizalofop		C18763	Benzenoids	Benzene and substituted derivatives	2-phenoxypropionic acids	5.79829e+06	6.67736e+06	6.00131e+06	4.97735e+06	5.52064e+06	5.6295e+06	6.47767e+06	6.79018e+06	6.16091e+06	5.7116e+06	6.37875e+06	7.06825e+06
M394T266	394.064	265.697	Rac-4-sulfoxypropranolol						2.26626e+06	1.59161e+06	1.704e+06	1.84354e+06	1.63686e+06	2.49001e+06	1.53742e+06	2.36351e+06	1.93959e+06	2.43087e+06	1.40369e+06	2.49891e+06
M353T25	353.2	24.9754	Rauwolscine						2.76371e+06	4.71338e+06	1.63071e+06	3.93384e+06	991365	2.07118e+06	4.79375e+06	2.03661e+06	1.67916e+06	2.76599e+06	2.58184e+06	2.21304e+06
M609T191	609.304	190.816	Reserpine	HMDB0014351	C06539				4.93145e+06	39396.7	4.34193e+06	3.16469e+06	3.7514e+06	2.64977e+06	2.77397e+06	2.76062e+06	3.29386e+06	3.85502e+06	3.39913e+06	3.36275e+06
M390T606	390.164	605.587	Retrorsine n-oxide		C10333				1.31361e+06	1.27167e+06	1.29815e+06	1.30146e+06	1.18951e+06	1.3303e+06	1.27418e+06	968103	1.25169e+06	1.24515e+06	1.2597e+06	1.24612e+06
M297T36	297.244	35.8883	Ricinoleic acid	HMDB0034297	C08365	Lipids and lipid-like molecules	Fatty Acyls	Fatty acids and conjugates	9.00605e+06	6.09323e+06	5.32381e+06	12282800	1.05545e+07	1.00064e+07	7.61162e+06	8.74704e+06	7.627e+06	7.84249e+06	8.2647e+06	9.8036e+06
M847T192_2	847.467	191.675	Rifabutin		C07235				1.52656e+06	1.40965e+06	1.43044e+06	1.59465e+06	1.2308e+06	1.46357e+06	1.14854e+06	1.17903e+06	1.13843e+06	1.50683e+06	1.52732e+06	1.3892e+06
M235T213	235.014	212.794	Riluzole	HMDB0014878	C07937				6.53879e+06	8.68907e+06	7.92907e+06	6.66972e+06	5.52984e+06	7.20008e+06	7.61e+06	6.28171e+06	5.11159e+06	6.40507e+06	7.21529e+06	7.457e+06
M192T625	192.101	625.028	Rotundine		C02890				7.38702e+07	5.40729e+07	7.00092e+07	6.02756e+07	67350181	6.09016e+07	5.09573e+07	6.32392e+07	6.30045e+07	5.84077e+07	6.87931e+07	5.74951e+07
M609T30	609.138	30.223	Rutin	HMDB0003249	C05625	Phenylpropanoids and polyketides	Flavonoids	Flavonoid glycosides	874463	845010	1.04482e+06	801274	884581	909961	588080	741612	654432	738337	717866	674948
M146T185	146.025	185.061	S-(2-boronoethyl)-l-cysteine			Organic acids and derivatives	Carboxylic acids and derivatives	Amino acids, peptides, and analogues	1.82486e+06	2.12865e+06	1.44195e+06	1.75615e+06	1.56761e+06	1.85568e+06	1.45322e+06	1.15774e+06	1.24612e+06	1.69024e+06	1.97671e+06	1.4601e+06
M695T30	695.312	29.8473	S4:18(p3:16/f1:2)						2.12322e+06	2.3882e+06	1.85211e+06	1.16426e+06	1.23479e+06	1.26597e+06	1.39553e+06	1.46039e+06	2.27957e+06	3.64994e+06	2.97705e+06	1.79715e+06
M399T576	399.145	575.841	S-adenosyl-l-methionine	HMDB0001185	C00019	Nucleosides, nucleotides, and analogues	5'-deoxyribonucleosides	5'-deoxy-5'-thionucleosides	3.66499e+06	4.64264e+06	5.17064e+06	3.74832e+06	4.53756e+06	854815	4.15467e+06	2.8396e+06	4.43857e+06	3.84888e+06	4.7665e+06	4.91116e+06
M399T515	399.145	514.9	S-adenosylmethionine	HMDB0001185	C00019	Nucleosides, nucleotides, and analogues	5'-deoxyribonucleosides	5'-deoxy-5'-thionucleosides	13479520	12691330	5144731	1.11805e+07	2.24898e+07	3.01562e+07	5.77945e+06	4.10075e+06	2.97654e+06	2.45574e+07	2.74797e+07	7.21059e+06
M779T193	779.472	192.5	Saikosaponin a		C08975	Lipids and lipid-like molecules	Prenol lipids	Terpene glycosides	1.43015e+06	1.39145e+06	1.50976e+06	3.06901e+06	2.87014e+06	2.89087e+06	2.00863e+06	2.45315e+06	2.88807e+06	2.38572e+06	2.69644e+06	2.52182e+06
M123T63	123.055	63.4851	Salicylaldehyde	HMDB0034170	C06202	Organic oxygen compounds	Organooxygen compounds	Carbonyl compounds	1410923277	1474793329	1544786847	1160099460	1408010631	1298233049	1331918392	1248030192	1287957698	1207616065	1420731216	1245180395
M299T22	299.132	22.2588	Salidroside		C06046	Organic oxygen compounds	Organooxygen compounds	Carbohydrates and carbohydrate conjugates	341806	400595	427741	194713	253425	313022	203355	255613	232832	220754	264289	234537
M416T372	416.262	372.188	Salmeterol	HMDB0015073	C07241	Benzenoids	Benzene and substituted derivatives	Benzyl alcohols	526881	412348	1.1257e+06	65735.2	375767	296634	511366	957324	1.33594e+06	67854.8	405040	446210
M386T389	386.124	389.248	Sarafloxacin	HMDB0039526		Organoheterocyclic compounds	Quinolines and derivatives	Phenylquinolines	5.33745e+06	6.73433e+06	9.00502e+06	5.61875e+06	8.15328e+06	6.43863e+06	6.75896e+06	6.86879e+06	1.46518e+07	5.95123e+06	6.72032e+06	6.37987e+06
M88T336	88.0404	336.382	Sarcosine	HMDB0000271	C00213	Organic acids and derivatives	Carboxylic acids and derivatives	Amino acids, peptides, and analogues	6.66654e+06	6.87935e+06	8.23168e+06	5.56313e+06	7.83136e+06	6.51983e+06	5.89596e+06	6.13661e+06	6.94206e+06	5.6044e+06	6.91652e+06	6.09414e+06
M529T219_2	529.245	218.698	Satratoxin h			Lipids and lipid-like molecules	Prenol lipids	Sesquiterpenoids	1.53626e+06	1.08716e+06	1.2676e+06	582236	319584	640829	286538	203618	195725	399376	505433	436570
M402T392	402.21	391.858	Schizandrin a		C16951	Phenylpropanoids and polyketides	Tannins	Hydrolyzable tannins	548840	1.63124e+06	1.42102e+06	691204	1.56917e+06	674945	1.23552e+06	3.274e+06	2.2555e+06	1.57728e+06	599816	1.50626e+06
M495T30	495.266	30.1107	Schweinfurthin e			Organoheterocyclic compounds	Benzopyrans	1-benzopyrans	5.56514e+06	5.96745e+06	6.14923e+06	4.70435e+06	4.61961e+06	5.21787e+06	4.60795e+06	4.29022e+06	4.91158e+06	4.62945e+06	5.42358e+06	5.21896e+06
M377T409	377.074	409.062	Scopolin		C01527	Phenylpropanoids and polyketides	Coumarins and derivatives	Coumarin glycosides	1.66578e+06	1.82705e+06	1.75979e+06	1.55374e+06	1.62824e+06	1.62348e+06	1.69079e+06	1.73164e+06	1.54896e+06	1.64019e+06	1.86919e+06	1.91977e+06
M376T434	376.194	434.174	Ser-Asn-Arg			Organic acids and derivatives	Carboxylic acids and derivatives	Amino acids, peptides, and analogues	533917	544808	895713	141868	397126	345945	463054	911084	1.08423e+06	230452	359175	244570
M191T345	191.067	345.082	Ser-Ser			Organic acids and derivatives	Carboxylic acids and derivatives	Amino acids, peptides, and analogues	704958	1.6795e+06	1.62566e+06	627348	847575	870550	1.46361e+06	2.49305e+06	1.44208e+06	1.2896e+06	707407	1.47705e+06
M202T381	202.082	381.138	Simazine		C11172	Organoheterocyclic compounds	Triazines	1,3,5-triazines	49529.8	80110.6	83827.8	67029	68076.5	94350.3	100335	123920	88548.8	78515.8	55825.9	74061.6
M322T146	322.192	145.811	Sisomicin		C00494	Organic oxygen compounds	Organooxygen compounds	Carbohydrates and carbohydrate conjugates	1.37969e+06	624563	1.29602e+06	1.33106e+06	671067	1.12216e+06	1.17376e+06	714655	689009	1.29922e+06	1.57589e+06	1.63206e+06
M402T300	402.098	300.449	S-lactoylglutathione	HMDB0001066	C03451	Organic acids and derivatives	Carboxylic acids and derivatives	Amino acids, peptides, and analogues	2.88266e+06	2.81082e+06	2.91827e+06	2.32821e+06	4.58215e+06	2.8006e+06	3.88272e+06	4.19824e+06	4.3748e+06	3.56474e+06	2.90686e+06	4.19833e+06
M762T159	761.582	158.627	Sm d34:1			Lipids and lipid-like molecules	Sphingolipids	Phosphosphingolipids	1.19005e+07	1.45669e+07	1.20161e+07	1.39365e+07	1.41314e+07	1.64229e+07	7.96649e+06	1.47624e+07	1.49235e+07	1.7533e+07	1.2709e+07	1.95481e+07
M872T168	871.692	168.177	Sm d42:2			Lipids and lipid-like molecules	Sphingolipids	Phosphosphingolipids	2.61918e+06	2.41212e+06	1.62223e+06	1.91845e+06	2.11563e+06	1.35461e+06	1.32667e+06	1.94875e+06	1.11946e+06	1.15102e+06	1.9766e+06	1.32373e+06
M298T101	298.097	100.864	S-methyl-5'-thioadenosine	HMDB0001173	C00170	Nucleosides, nucleotides, and analogues	5'-deoxyribonucleosides	5'-deoxy-5'-thionucleosides	148061246	149762065	152573145	8.32049e+07	8.8365e+07	116749494	164318330	140461928	7.9377e+07	162406016	126665642	126572487
M214T380_3	214.049	380.302	sn-Glycerol 3-phosphoethanolamine			Lipids and lipid-like molecules	Glycerophospholipids	Glycerophosphoethanolamines	1.34152e+07	2.23437e+07	6.59841e+06	2.70922e+07	30156249	3.20153e+07	4.41096e+07	5.16827e+07	2.50617e+07	3.78833e+07	1.10111e+07	5.28504e+07
M238T381	238.045	380.529	Sn-glycerol-3-phosphoethanolamine		C01233	Lipids and lipid-like molecules	Glycerophospholipids	Glycerophosphoethanolamines	2.50815e+06	4.02146e+06	1.24382e+06	5.32759e+06	5.49221e+06	5.81154e+06	8.17782e+06	8.23707e+06	4.38883e+06	7.18288e+06	2.30651e+06	9.46729e+06
M414T164	414.358	164.098	Solasodine	HMDB0035282	C10822	Lipids and lipid-like molecules	Steroids and steroid derivatives	Steroidal alkaloids	134680	308559	278130	116388	279291	275380	272570	502386	508129	309802	1.12812e+06	609644
M264T34_2	264.269	33.6138	Sphingosine	HMDB0000252	C00319	Organic nitrogen compounds	Organonitrogen compounds	Amines	8.71582e+07	103495354	107261767	113457050	115930400	9.89932e+07	9.07561e+07	9.01857e+07	9.04477e+07	126402543	128041139	113352929
M374T427	374.215	426.871	Spirotetramat		C18807	Benzenoids	Benzene and substituted derivatives	Xylenes	1.50577e+06	675323	1.13378e+06	231511	1.22654e+06	578741	956107	1.67353e+06	1.7192e+06	961442	1.00047e+06	1.09093e+06
M284T128	284.295	127.823	Stearamide	HMDB0034146	C13846	Organic acids and derivatives	Carboximidic acids and derivatives	Carboximidic acids	4.47853e+06	6.86502e+06	4.49633e+06	8.00591e+06	7.62538e+06	6.65374e+06	8.83762e+06	8.05245e+06	8.83412e+06	1.10198e+07	8.51369e+06	9.40938e+06
M173T182	173.082	181.921	Suberic acid	HMDB0000893	C08278	Lipids and lipid-like molecules	Fatty Acyls	Fatty acids and conjugates	2.13701e+06	2.25128e+06	2.22594e+06	1.90481e+06	3.04478e+06	3.76067e+06	3.11175e+06	2.57958e+06	3.60727e+06	2.26074e+06	2.18196e+06	2.29086e+06
M117T379	117.019	379.096	Succinate	HMDB0000254	C00042	Organic acids and derivatives	Carboxylic acids and derivatives	Dicarboxylic acids and derivatives	9.94716e+06	15389462	8.74462e+06	8.26836e+06	8.28695e+06	9.34712e+06	1.02866e+07	1.01315e+07	8.13088e+06	8.89463e+06	7.28809e+06	1.17623e+07
M101T361	101.024	361.212	Succinic semialdehyde	HMDB0001259	C00232	Lipids and lipid-like molecules	Fatty Acyls	Fatty acids and conjugates	2.23735e+06	2.77118e+06	2.40543e+06	1.86534e+06	2.07282e+06	2.07061e+06	1.94852e+06	2.19577e+06	2.47528e+06	2.11829e+06	2.1619e+06	2.24527e+06
M365T357	365.106	356.769	Sucrose	HMDB0000258	C00089	Organic oxygen compounds	Organooxygen compounds	Carbohydrates and carbohydrate conjugates	1.14101e+06	1.06762e+06	1.07984e+06	1.29521e+06	1.10488e+06	1.43709e+06	1.17083e+06	1.11738e+06	1.13443e+06	1.43425e+06	1.51483e+06	1.40635e+06
M116T31	116.053	30.711	Sulfallate		C19096	Organic acids and derivatives	Dithiocarbamic acids and derivatives	Dithiocarbamic acid esters	1.4793e+06	2.19705e+06	1.62878e+06	1.72676e+06	1.83631e+06	1.46363e+06	1.53825e+06	2.06612e+06	1.43651e+06	1.78578e+06	1.25486e+06	1.43513e+06
M279T35	279.094	34.9128	Sulfamethazine	HMDB0015522	C19530	Benzenoids	Benzene and substituted derivatives	Benzenesulfonamides	995099	1.03994e+06	1.20492e+06	929507	993183	1.25605e+06	1.04965e+06	902915	1.10219e+06	1.42772e+06	1.00957e+06	1.13312e+06
M381T390	381.08	389.666	Sulfasalazine	HMDB0014933	C07316	Organoheterocyclic compounds	Azobenzenes		5.94407e+06	1.34071e+07	1.38756e+07	9.60804e+06	1.56029e+07	1.53885e+07	1.69827e+07	2.30358e+07	2.37445e+07	1.36823e+07	1.64623e+07	1.5908e+07
M239T504	238.892	503.926	Sulfuric acid	HMDB0001448	C00059	Homogeneous non-metal compounds	Non-metal oxoanionic compounds	Non-metal sulfates	3.23029e+06	3.33578e+06	3.39939e+06	3.28698e+06	3.70016e+06	3.11321e+06	3.33315e+06	3.41729e+06	3.11643e+06	3.20503e+06	3.5075e+06	3.36632e+06
M371T33	371.06	33.2795	Sulindac sulfone						1.74515e+07	1.86688e+07	2.01789e+07	1.26551e+07	1.40995e+07	1.47595e+07	1.30734e+07	1.63352e+07	1.49354e+07	1.47609e+07	1.41415e+07	1.58504e+07
M174T624	174.128	624.222	Swainsonine		C10173				2.70652e+06	4.73376e+06	4.97192e+06	6.82993e+06	1.85821e+06	4.71742e+06	3.86757e+06	5.53231e+06	5.52296e+06	1.02459e+06	6.44191e+06	7.27307e+06
M124T286_1	124.007	286.463	Taurine	HMDB0000251	C00245	Organic acids and derivatives	Organic sulfonic acids and derivatives	Organosulfonic acids and derivatives	4.14073e+07	4.53777e+07	42328968	3.49903e+07	33249238	3.65692e+07	4.69741e+07	4.81233e+07	4.70609e+07	5.10542e+07	5.69357e+07	6.03535e+07
M498T152	498.291	152.363	Taurochenodeoxycholate	HMDB0000951	C05465	Lipids and lipid-like molecules	Steroids and steroid derivatives	Bile acids, alcohols and derivatives	622109	626992	746824	794263	603817	604399	936277	1.26128e+06	822089	879519	721369	770522
M286T388	286.051	388.044	Tenofovir	HMDB0014445	C17407	Organoheterocyclic compounds	Imidazopyrimidines	Purines and purine derivatives	622063	692325	570765	490441	570296	503121	547874	618464	659290	587919	615885	642675
M165T350	165.019	349.885	Terephthalic acid	HMDB0002428	C06337	Benzenoids	Benzene and substituted derivatives	Benzoic acids and derivatives	2.65964e+07	2.70822e+07	2.66597e+07	2.63676e+07	2.49187e+07	2.60873e+07	2.57934e+07	2.31619e+07	2.39786e+07	2.51133e+07	2.64642e+07	2.55728e+07
M387T137	387.289	136.546	Testosterone isocaproate		C14663	Lipids and lipid-like molecules	Steroids and steroid derivatives	Steroid esters	9.76813e+06	1.09886e+07	1.02884e+07	1.15782e+07	9.87247e+06	1.19215e+07	1.06216e+07	1.2776e+07	9.53722e+06	1.33643e+07	1.05758e+07	1.29293e+07
M214T103	214.253	102.909	Tetradecylamine			Organic nitrogen compounds	Organonitrogen compounds	Amines	5.22865e+06	6.92348e+06	6.51398e+06	7.36664e+06	6.42265e+06	8.32829e+06	8.85141e+06	8.98036e+06	7.64453e+06	9.36154e+06	8.97368e+06	7.86082e+06
M195T63	195.123	63.1685	Tetraethylene glycol	HMDB0094708		Organic oxygen compounds	Organooxygen compounds	Ethers	1.30132e+07	2.08852e+07	3.08633e+07	2.31894e+07	8.17684e+06	1.66708e+07	2.55876e+07	13453024	25644535	2.10926e+07	2.77593e+07	2.39818e+07
M349T24	349.242	23.6728	Tetrahydrocorticosterone	HMDB0000268	C05476	Lipids and lipid-like molecules	Steroids and steroid derivatives	Hydroxysteroids	430417	728468	535829	467515	394175	423324	461066	380742	313770	410338	364819	298434
M623T236	623.318	236.083	Tetrandrine		C09654				463814	692337	517197	916891	599100	736756	657197	582088	743552	1.01149e+06	744796	766366
M302T389	302.103	389.193	Tetrodotoxin		C11692	Organoheterocyclic compounds	Diazanaphthalenes	Benzodiazines	1.48678e+06	1.78794e+06	3.05678e+06	1.78621e+06	4.68788e+06	2.05758e+06	1.24961e+06	1.29112e+06	1.19111e+06	1.16306e+06	1.3244e+06	1.55178e+06
M351T436	351.013	436.436	Thelephoric acid	HMDB0030552					614500	726440	1.37063e+06	663166	709934	875670	1.43058e+06	1.71369e+06	2.54751e+06	275410	1.27557e+06	233649
M265T337	265.112	336.783	Thiamine	HMDB0000235	C00378	Organoheterocyclic compounds	Diazines	Pyrimidines and pyrimidine derivatives	3.52617e+07	4.20494e+07	3.68461e+07	2.57207e+07	2.69911e+07	2.90096e+07	1.36697e+07	1.16301e+07	1.4546e+07	1.382e+07	3.7905e+07	2.55421e+07
M359T386	359.045	386.182	Thieno[2,3-b]pyridine-5-carbonitrile, 6,7-dihydro-4-hydroxy-3-(2'-hydroxy[1,1'-biphenyl]-4-yl)-6-oxo-			Benzenoids	Benzene and substituted derivatives	Biphenyls and derivatives	4.95394e+06	7.33259e+06	6.09174e+06	2.00895e+06	3131991	3.00411e+06	3.00107e+06	3.58692e+06	3.73713e+06	2.81077e+06	3.3059e+06	4.15171e+06
M410T266	410.041	265.693	Thifensulfuron-methyl		C10957	Organoheterocyclic compounds	Thiophenes	Thiophene carboxylic acids and derivatives	3.55251e+06	4.43767e+06	5.73828e+06	2.57431e+06	3.89141e+06	3.23051e+06	4.96895e+06	4.78546e+06	3.97183e+06	3.37063e+06	5.34189e+06	3.53996e+06
M719T141	718.575	140.506	Thioetheramide-PC						321176502	340358905	325452411	285767813	290055965	243839108	221072341	243867677	274677802	302259205	308069382	312848989
M252T26	252.073	25.7275	Thiorphan		C01619	Organic acids and derivatives	Carboxylic acids and derivatives	Amino acids, peptides, and analogues	1.70257e+06	3.12368e+06	3.34078e+06	2.71887e+06	1.7235e+06	3.99981e+06	2.74167e+06	2.49154e+06	3.27038e+06	3.06622e+06	2.18664e+06	2.20247e+06
M135T184_1	134.895	183.894	Thiosulfuric acid	HMDB0000257		Homogeneous non-metal compounds	Non-metal oxoanionic compounds	Non-metal thiosulfates	2.8753e+06	3.31717e+06	3.03842e+06	3.47458e+06	2.85742e+06	2.49561e+06	2.96274e+06	3.13227e+06	3.20337e+06	3.18256e+06	2.47792e+06	2.88696e+06
M183T26	183.005	25.5282	Thiouric acid	HMDB0060417	C16613	Organoheterocyclic compounds	Imidazopyrimidines	Purines and purine derivatives	511528	555447	571126	561052	546790	566925	428671	444679	428356	474845	634136	527106
M191T307	191.103	306.786	Thr-Ala			Organic acids and derivatives	Carboxylic acids and derivatives	Amino acids, peptides, and analogues	189575	436603	448876	228564	358044	289127	479568	1.00673e+06	723296	424030	187866	548782
M276T391	276.167	391.127	Thr-Arg			Organic acids and derivatives	Carboxylic acids and derivatives	Amino acids, peptides, and analogues	3.14374e+06	5.76854e+06	5.47785e+06	1.39542e+06	2.41707e+06	2.0401e+06	3.41542e+06	5.93604e+06	5.57952e+06	1.69684e+06	2.03164e+06	3.81834e+06
M177T320	177.088	320.244	Thr-Gly			Organic acids and derivatives	Carboxylic acids and derivatives	Amino acids, peptides, and analogues	217211	546014	418250	358890	302952	392703	509636	763736	768013	454817	314222	505042
M205T328	205.083	327.637	Thr-Ser			Organic acids and derivatives	Carboxylic acids and derivatives	Amino acids, peptides, and analogues	760630	1.69818e+06	1.75081e+06	744347	887412	982631	1.4749e+06	2.37647e+06	1.55213e+06	1.52424e+06	782418	1.60844e+06
M311T27_2	311.169	27.0825	Thymol-beta-d-glucoside			Lipids and lipid-like molecules	Prenol lipids	Terpene glycosides	2.58406e+07	3.06758e+07	2.25945e+07	5.1016e+07	33141258	5.28696e+07	3.77154e+07	3.24221e+07	3.4204e+07	4.17856e+07	3.34756e+07	4.68894e+07
M324T121	324.218	121.373	Tolterodine	HMDB0015170	C07750	Benzenoids	Benzene and substituted derivatives	Diphenylmethanes	30006.8	39390.9	54616.2	179305	39446.5	101492	130429	42518.7	263708	332131	24985.1	240908
M416T188	416.337	187.526	Tomatidin		C10826	Lipids and lipid-like molecules	Steroids and steroid derivatives	Steroidal alkaloids	393394	52623.1	67903.5	114614	141919	161149	159187	110539	48091.5	103244	572682	260744
M362T372_1	362.084	372.196	Topiramate	HMDB0005034	C07502	Organoheterocyclic compounds	Dioxolopyrans		3.67581e+06	5.42753e+06	2.02846e+06	6.30622e+06	6.01368e+06	6.31853e+06	9.96803e+06	1.01038e+07	5.28027e+06	9.77632e+06	2.76366e+06	1.11307e+07
M246T512	246.181	512.079	Tramadol	HMDB0014339	C07153	Benzenoids	Phenol ethers	Anisoles	4.024e+06	4.68503e+06	4.21813e+06	2.86106e+06	3.28725e+06	3.03652e+06	3.45775e+06	3.5558e+06	3.23752e+06	3.41643e+06	3.46843e+06	4.13901e+06
M429T218	429.263	218.242	Trandolapril			Organic acids and derivatives	Carboxylic acids and derivatives	Amino acids, peptides, and analogues	544727	610393	535970	221940	144429	246361	121967	80192.1	95276.9	178687	198172	172692
M207T300	207.081	300.307	Trans-3,5-dimethoxy-4-hydroxycinnamaldehyde		C05610	Benzenoids	Phenols	Methoxyphenols	150209	52633.9	134899	86146.1	243918	121279	212154	327392	234498	203061	83793.1	257813
M367T299	367.105	298.824	Trans-3'-hydroxycotinine o-.beta.-d-glucuronide			Organic oxygen compounds	Organooxygen compounds	Carbohydrates and carbohydrate conjugates	4.74527e+06	8.63708e+06	6.18242e+06	3.49883e+06	1.17067e+07	3.82796e+06	1.8356e+07	3.58256e+07	3.32483e+07	1.03351e+07	6.13015e+06	1.68313e+07
M158T35	158.097	34.6956	Trans-4-(aminomethyl)cyclohexanecarboxylic acid	HMDB0014447	C12535	Organic acids and derivatives	Carboxylic acids and derivatives	Amino acids, peptides, and analogues	427850	215124	455919	720800	644055	496486	476779	819177	524742	463455	553967	285640
M193T297_2	193.036	296.692	Trans-ferulic acid	HMDB0000954	C01494	Phenylpropanoids and polyketides	Cinnamic acids and derivatives	Hydroxycinnamic acids and derivatives	723886	1.86898e+06	883618	782747	511420	691688	879054	71462.1	1.32128e+06	818740	1.13062e+06	827632
M219T641	219.175	640.551	Tributylphosphine oxide		C10955	Organophosphorus compounds	Organic phosphines and derivatives	Organophosphine oxides	602997	2.89679e+06	1.56021e+06	1.52949e+06	1.54519e+06	1.81902e+06	1.81861e+06	1.55514e+06	1.38283e+06	723751	1.6343e+06	1.27463e+06
M365T598	364.867	597.869	Trichlormethiazide	HMDB0015156	C07767	Organoheterocyclic compounds	Thiadiazines	Benzothiadiazines	2.75735e+06	4.88617e+06	3.33628e+06	2.10658e+06	4.15179e+06	1.94509e+06	2.6392e+06	3.56542e+06	4.98559e+06	3.26298e+06	4.8588e+06	2.78525e+06
M258T423_2	257.933	422.841	Triclopyr		C11032	Organoheterocyclic compounds	Pyridines and derivatives	Halopyridines	7.05184e+07	6.75508e+07	6.86594e+07	7.22056e+07	6.78865e+07	7.21113e+07	7.41819e+07	6.47205e+07	66951327	7.31339e+07	7.27585e+07	7.13089e+07
M150T149	150.112	149.173	Triethanolamine	HMDB0032538	C06771	Organic nitrogen compounds	Organonitrogen compounds	Amines	5.06279e+06	4.43926e+06	4.85471e+06	3.03459e+07	1.76344e+06	4.29121e+06	3.9268e+06	2.82841e+06	5.96998e+06	7.48802e+06	4.95591e+06	5.8922e+06
M381T302	381.035	302.244	Triflumuron		C18615	Benzenoids	Benzene and substituted derivatives	N-phenylureas	516243	453560	366694	680534	797969	607397	534660	518750	631662	529156	543606	564709
M76T321	76.0758	320.978	Trimethylamine n-oxide	HMDB0000925	C01104	Organic nitrogen compounds	Organonitrogen compounds	Aminoxides	1.09642e+06	402173	408372	579321	538737	658569	1.33032e+06	596585	758638	1.11961e+06	711954	1.11733e+06
M275T632	275.095	632.064	Trinexapac-ethyl		C18541				3.08095e+06	3.06605e+06	2.05277e+06	4.58625e+06	2.83256e+06	3.40861e+06	3.21583e+06	3.0882e+06	4.72334e+06	3.27545e+06	3.15192e+06	3.18641e+06
M457T389	457.162	389.097	Trioxsalen	HMDB0015575	C09314	Phenylpropanoids and polyketides	Coumarins and derivatives	Furanocoumarins	1.96174e+06	2.55801e+06	4.18897e+06	2.088e+06	3.85488e+06	2.4535e+06	2.68944e+06	2.88931e+06	2.81076e+06	2.3312e+06	2.69533e+06	2.7182e+06
M122T576	122.082	576.465	Tris(hydroxymethyl)aminomethane	HMDB0240288	C07182	Organic nitrogen compounds	Organonitrogen compounds	Amines	1.57999e+07	1.55975e+07	1.53126e+07	1.59517e+07	1.57159e+07	1.55333e+07	1.5715e+07	1.48304e+07	2.36471e+07	3.31688e+06	1.18976e+07	1.5212e+07
M306T274	306.034	274.158	Trp-Cys	HMDB0001202	C00239	Nucleosides, nucleotides, and analogues	Pyrimidine nucleotides	Pyrimidine deoxyribonucleotides	1.31808e+06	1.44922e+06	1.58531e+06	741561	1.25697e+06	1.28925e+06	1.25366e+06	1.83863e+06	1.93248e+06	1.06075e+06	1.0543e+06	1.25309e+06
M376T32_2	376.26	32.3135	Tuberostemonine			Alkaloids and derivatives	Stemona alkaloids	Stemoamide-type alkaloids	288133019	150027165	208452326	256239974	259399141	240901989	298758352	311154022	211220918	252169222	250951950	174860271
M329T184	329.15	183.567	Tyr-Phe			Organic acids and derivatives	Carboxylic acids and derivatives	Amino acids, peptides, and analogues	1.72345e+06	1.6214e+06	4.34903e+06	506327	1.07936e+06	1.15596e+06	1.72693e+06	1.21462e+06	1.48726e+06	717840	1.06823e+06	1.60875e+06
M565T455	565.05	455.141	Udp-d-glucose	HMDB0000286	C00029	Nucleosides, nucleotides, and analogues	Pyrimidine nucleotides	Pyrimidine nucleotide sugars	250586	475716	245858	160615	443205	245636	428710	879370	509234	307727	313290	637654
M565T434_2	565.049	434.045	Udp-galactose	HMDB0000302	C00052	Nucleosides, nucleotides, and analogues	Pyrimidine nucleotides	Pyrimidine nucleotide sugars	4.76919e+06	6.29086e+06	5.09039e+06	3.76211e+06	5.49836e+06	5.14472e+06	5.41132e+06	9.6435e+06	5.91076e+06	5.02089e+06	5.54344e+06	6.72263e+06
M606T421_2	606.075	421.452	Udp-n-acetylglucosamine	HMDB0000290	C00043	Nucleosides, nucleotides, and analogues	Pyrimidine nucleotides	Pyrimidine nucleotide sugars	300158276	439222774	340499853	135752681	184998249	213914620	169311844	226533441	195602773	209841371	208741823	275515401
M185T37	185.155	36.5967	Undecanoic acid	HMDB0000947	C17715	Lipids and lipid-like molecules	Fatty Acyls	Fatty acids and conjugates	527165	307638	299856	1.72242e+06	1854554	1.5177e+06	1.49984e+06	1.68179e+06	1.97809e+06	1.69168e+06	1.98317e+06	1.5416e+06
M111T87	111.02	87.1739	Uracil	HMDB0000300	C00106	Organoheterocyclic compounds	Diazines	Pyrimidines and pyrimidine derivatives	6.81982e+07	5.64912e+07	6.65346e+07	5.28721e+07	3.38788e+07	4.41077e+07	3.34956e+07	34198733	5.59991e+07	3.19629e+07	4.46788e+07	30239372
M158T341	158.01	341.022	Ureidosuccinic acid			Organic acids and derivatives	Carboxylic acids and derivatives	Amino acids, peptides, and analogues	416080	414292	413163	262639	249042	299311	165400	251659	215064	235482	207446	170226
M243T161_2	243.062	160.894	Uridine	HMDB0000296	C00299	Nucleosides, nucleotides, and analogues	Pyrimidine nucleosides		198512093	321810698	217276528	167503769	119463445	203617485	193818013	196873168	151912673	165950122	132899447	207022752
M674T421	674.035	421.251	Uridine 5'-(trihydrogen diphosphate), p'-[2-(acetylamino)-2-deoxy-.alpha.-d-galactopyranosyl] ester	HMDB0060522		Nucleosides, nucleotides, and analogues	Pyrimidine nucleotides	Pyrimidine nucleotide sugars	2.40212e+06	2.58502e+06	2.41069e+06	1.87879e+06	1.951e+06	2.19429e+06	1.82365e+06	1.96505e+06	1.77745e+06	2.25035e+06	2.22467e+06	2.50307e+06
M403T422	402.995	421.77	Uridine 5'-diphosphate	HMDB0000295	C00015	Nucleosides, nucleotides, and analogues	Pyrimidine nucleotides	Pyrimidine ribonucleotides	1.07938e+06	1.49457e+06	1.2032e+06	303595	484624	669227	507113	712881	675576	697855	794146	912944
M611T435	611.027	434.642	Uridine 5'-diphosphogalactose	HMDB0015279	C00052	Nucleosides, nucleotides, and analogues	Pyrimidine nucleotides	Pyrimidine nucleotide sugars	1.61171e+06	1.78702e+06	1.35212e+06	1.45908e+06	1.38633e+06	1.61906e+06	1756183	2.00461e+06	1.22513e+06	1.66502e+06	1.71406e+06	1.95699e+06
M625T469	625.006	468.981	Uridine 5'-diphosphoglucuronic acid	HMDB0000935		Nucleosides, nucleotides, and analogues	Pyrimidine nucleotides	Pyrimidine nucleotide sugars	736005	938831	874466	398354	555460	485220	547359	801155	775837	512712	650791	694774
M579T469	579.028	469.006	Uridine 5'-diphosphoglucuronic acid (UDP-D-glucuronate)			Nucleosides, nucleotides, and analogues	Pyrimidine nucleotides	Pyrimidine nucleotide sugars	1.92416e+06	2.88569e+06	2.57864e+06	962663	1.65939e+06	1.32194e+06	1.66615e+06	3.40662e+06	2.70226e+06	1.60869e+06	1.87312e+06	2.13469e+06
M323T428_1	323.029	428.046	Uridine 5'-monophosphate	HMDB0000288	C00105	Nucleosides, nucleotides, and analogues	Pyrimidine nucleotides	Pyrimidine ribonucleotides	16584736	1.98866e+07	2.59812e+07	5.21597e+06	1.50171e+07	6.5828e+06	1.24548e+07	1.42143e+07	2.02969e+07	1.10238e+07	1.54565e+07	1.29175e+07
M323T481	323.029	481.216	Uridine 5'-monophosphate (UMP)	HMDB0000288	C00105	Nucleosides, nucleotides, and analogues	Pyrimidine nucleotides	Pyrimidine ribonucleotides	528434	708600	631358	195398	430964	239150	480024	543527	626383	696511	480316	482914
M565T390_1	565.045	390.131	Uridine diphosphate glucose(UDP-D-Glucose)	HMDB0000286/HMDB0060079	C00029	Nucleosides, nucleotides, and analogues	Pyrimidine nucleotides	Pyrimidine nucleotide sugars	146494	192853	170741	302023	315157	297487	310142	304541	302594	336951	316556	259529
M606T460	606.075	460.425	Uridine diphosphate-n-acetylglucosamine	HMDB0000290	C00043	Nucleosides, nucleotides, and analogues	Pyrimidine nucleotides	Pyrimidine nucleotide sugars	650662	1.0528e+06	652241	331088	554756	386499	592634	695046	1.40859e+06	620871	544751	915154
M411T154	411.347	154.483	Ursolic acid methyl ester			Lipids and lipid-like molecules	Prenol lipids	Triterpenoids	7.42151e+06	3.16704e+06	6.47432e+06	4.28443e+06	3.9438e+06	3.81043e+06	4.09077e+06	3.29226e+06	4.17407e+06	4.07176e+06	4.42239e+06	4.51011e+06
M319T36	319.264	35.7971	Urushiol i			Benzenoids	Phenols	Benzenediols	1.17447e+06	1.12977e+06	1.35753e+06	1.47982e+06	1.67204e+06	1.37206e+06	1.53839e+06	1.75784e+06	1.21019e+06	984278	1.51342e+06	1.33629e+06
M189T251	189.124	251.148	Val-Ala			Organic acids and derivatives	Carboxylic acids and derivatives	Amino acids, peptides, and analogues	1.33403e+06	3.43578e+06	3.00323e+06	1.11111e+06	1.62981e+06	1.27981e+06	3.27844e+06	4.9336e+06	3.42766e+06	2.33204e+06	1.24301e+06	3.08768e+06
M402T388_2	402.246	388.376	Val-Gln-Arg			Organic acids and derivatives	Carboxylic acids and derivatives	Amino acids, peptides, and analogues	742197	790239	1.13957e+06	137204	702624	332416	824275	1.52948e+06	1.95997e+06	186234	549884	420334
M336T389	336.153	389.075	Validamycin a		C12112	Organic oxygen compounds	Organooxygen compounds	Carbohydrates and carbohydrate conjugates	1.08898e+06	715034	1.04663e+06	1.07039e+06	685396	738419	658936	781647	1.32408e+06	607978	648968	715004
M957T174	956.563	174.263	Valinomycin		C06684	Organic acids and derivatives	Peptidomimetics	Depsipeptides	181543	222924	170994	170468	124779	140396	121766	82824.6	100630	183765	172297	172166
M217T209	217.155	208.654	Val-Val			Organic acids and derivatives	Carboxylic acids and derivatives	Amino acids, peptides, and analogues	778892	2.12983e+06	1.82043e+06	1.03798e+06	774840	904134	1.91125e+06	2.9392e+06	1.76458e+06	994515	735503	1.834e+06
M167T314	167.036	313.579	Vanillic acid	HMDB0000484	C06672	Benzenoids	Benzene and substituted derivatives	Benzoic acids and derivatives	785698	402297	2.41987e+06	1.9471e+06	1.80662e+06	1.98366e+06	2.05665e+06	1.89312e+06	2.09992e+06	2.05513e+06	935814	2.13959e+06
M212T241	212.111	240.609	Varenicline						546003	732769	704145	454674	514855	495377	438690	459734	596066	392086	741114	537553
M113T379	113.071	378.558	Vigabatrin	HMDB0015212	C07500	Organic acids and derivatives	Carboxylic acids and derivatives	Amino acids, peptides, and analogues	7.37943e+06	8.03416e+06	10831005	4.39838e+06	7140504	5.67374e+06	6.9485e+06	8.70492e+06	1.13925e+07	6.94159e+06	6.87291e+06	6.82818e+06
M216T312	216.036	311.88	Visnagin		C09049	Organoheterocyclic compounds	Benzopyrans	1-benzopyrans	521146	471305	698251	392016	462271	376292	454990	489081	668081	421910	489927	402102
M289T33	289.087	33.1911	Warfarin	HMDB0001935	C01541	Phenylpropanoids and polyketides	Coumarins and derivatives	Hydroxycoumarins	498063	657718	533503	412973	493662	492996	585737	680940	515619	437653	574454	404212
M338T480_2	337.899	479.558	Wiskostatin			Benzenoids	Benzene and substituted derivatives	Biphenyls and derivatives	4.32631e+07	4.27216e+07	4.19288e+07	4.21314e+07	4.10656e+07	4.20151e+07	4.25361e+07	42134414	4.23324e+07	4.11677e+07	4.30299e+07	44133422
M282T458	282.173	458.38	Xanomeline		C11767	Organic oxygen compounds	Organooxygen compounds	Ethers	1.92189e+06	2.10276e+06	2.00515e+06	1.79471e+06	1.60617e+06	1.89386e+06	1.43295e+06	1.70003e+06	2.03139e+06	1.87882e+06	2.0649e+06	2.09267e+06
M151T213_1	151.026	213.006	Xanthine	HMDB0000292	C00385	Organoheterocyclic compounds	Imidazopyrimidines	Purines and purine derivatives	7.0329e+07	6.48574e+07	75063441	5.17343e+07	5.25001e+07	5.81325e+07	53169245	5.10386e+07	6.55807e+07	5.38156e+07	6.46636e+07	5.41075e+07
M307T213_1	307.044	212.74	Xanthosine	HMDB0000299	C01762	Nucleosides, nucleotides, and analogues	Purine nucleosides		4.75739e+07	9.31611e+07	6.24e+07	5.20879e+07	3.58434e+07	65119379	54464063	4.70321e+07	3.32428e+07	4.31564e+07	53612544	6.7875e+07
M151T387	151.077	387.452	Xylitol	HMDB0002917	C00379	Organic oxygen compounds	Organooxygen compounds	Carbohydrates and carbohydrate conjugates	289370	249037	69360.2	253776	179105	206911	31606.4	289914	281431	351890	96660.3	240395
M301T334	301.141	334.084	Zearalenone		C09981	Phenylpropanoids and polyketides	Macrolides and analogues	Zearalenones	3.17766e+06	3.76327e+06	3.20499e+06	3.42329e+06	4.98914e+06	3.55262e+06	4.02151e+06	5.5633e+06	4.50625e+06	3.97112e+06	3.20877e+06	4.08477e+06
M119T34	119.086	34.0516	Zerumbone		C20262	Lipids and lipid-like molecules	Prenol lipids	Sesquiterpenoids	6.0466e+06	7.8381e+06	7.1153e+06	5.79422e+06	6.8504e+06	7.16722e+06	7.92524e+06	9.56774e+06	8.27214e+06	6.76347e+06	7.03696e+06	5.49114e+06
