# Supplementary material for: Using integrated transcriptomics and metabolomics to explore the effects of infant formula on the growth and development of small intestinal organoids
Source: Royal Society of Chemistry journal article supplement (doi:10.1039/d4fo01723d), 2024-01-01
Supplement: d4fo01723d4.xlsx [file d4fo01723d4.xlsx]

## Sheet: ReplicateRecalibration
Table S5. qRT-PCR
Gene	Group	Relative mRNA expression			SD
NR5A2	PMC	0.784301	1.26237	1.01002	0.239161
	PMS1	0.504386	0.549002	0.463563	0.0427337
	PMS2	0.327741	0.427061	0.321717	0.0591582
	PMS3	0.218918	0.213856	0.21459	0.00273544
HNF4G	PMC	1.00295	0.981116	1.01925	0.0191327
	PMS1	0.170374	0.21445	0.122111	0.0461852
	PMS2	0.350118	0.340522	0.360174	0.00982689
	PMS3	0.0933205	0.063444	0.101778	0.0201396
HNF1B	PMC	1.08412	0.922409	1.00299	0.0808542
	PMS1	0.44683	0.448489	0.436406	0.00654976
	PMS2	0.539597	0.606775	0.554826	0.0352219
	PMS3	0.378054	0.411561	0.426939	0.0249965
PAX4	PMC	0.977466	0.951497	1.0752	0.0652308
	PMS1	0.390543	0.361049	0.408513	0.023964
	PMS2	0.517865	0.658806	0.591554	0.0704952
	PMS3	0.592792	0.585356	0.533156	0.0324974
NKX6-1	PMC	1.00098	0.933817	1.06983	0.0680059
	PMS1	0.354003	0.268193	0.317969	0.0430883
	PMS2	0.600202	0.395483	0.523041	0.103388
	PMS3	0.299133	0.366098	0.416161	0.058717
HNF1A	PMC	1.09271	0.915152	1.13326	0.116005
	PMS1	0.441834	0.450732	0.414076	0.0191198
	PMS2	0.640938	0.569887	0.609303	0.0355966
	PMS3	0.202591	0.214899	0.232908	0.0152477
NKX2-2	PMC	1.01133	0.963189	1.03822	0.0380126
	PMS1	0.551136	0.540509	0.529753	0.0106916
	PMS2	0.581998	0.875985	0.622934	0.159237
	PMS3	0.822477	0.66838	0.77408	0.0788045
RFX6	PMC	0.975113	1.0229	1.02552	0.0283773
	PMS1	0.191565	0.0959553	0.127338	0.0487358
	PMS2	0.0766706	0.0719422	0.0752331	0.00242398
	PMS3	0.0912353	0.0754527	0.0674907	0.012085
NEUROG3	PMC	1.00334	0.996675	1.09788	0.056608
	PMS1	0.0549166	0.0520531	0.0541433	0.00148139
	PMS2	0.121049	0.10683	0.112386	0.00716608
	PMS3	0.0570549	0.0728303	0.0442453	0.0143181
NEUROG1	PMC	0.844859	1.11947	1.05266	0.143209
	PMS1	0.247564	0.276009	0.197402	0.0398005
	PMS2	0.312238	0.283629	0.425206	0.0748598
	PMS3	0.346773	0.268823	0.304874	0.0390116
IL1B	PMC	0.922789	0.978148	0.891716	0.0437807
	PMS1	2.12219	1.00011	1.01187	0.644466
ICAM1	PMC	1.45602	0.686803	1.04423	0.38493
	PMS1	19.2873	11.4195	22.5765	5.73291
NFKBIA	PMC	1.63888	1.01144	1.03183	0.356511
	PMS1	10.4291	12.1998	16.2775	2.99906
IRF1	PMC	1.04576	0.938261	1.01917	0.055988
	PMS1	1.335	1.42099	1.49644	0.0807771
SOCS3	PMC	0.844409	1.18426	1.03116	0.170203
	PMS1	2.98819	5.88308	2.02882	2.0065
CXCR4	PMC	0.955732	1.04632	1.04162	0.0509988
	PMS1	6.22627	6.09188	6.33445	0.121521
IL18	PMC	1.00501	1.09945	0.905014	0.0972299
	PMS1	1.7472	1.71148	1.10424	0.361342
KIF23	PMC	1.27094	0.912703	1.02378	0.183374
	PMS1	1.72089	1.74017	1.84178	0.064949
KIF2C	PMC	1.0557	1.00193	0.947234	0.0542358
	PMS1	3.42213	3.43281	3.43366	0.00642399
KIF11	PMC	0.903778	1.24296	1.22088	0.189777
	PMS1	2.92117	3.2289	3.21141	0.172844
RRM2	PMC	1.28394	1.40128	0.88453	0.270904
	PMS1	5.52791	6.33919	5.48584	0.480995
BIRC5	PMC	0.984083	1.01617	1.01388	0.017903
	PMS1	8.1235	7.1103	8.04497	0.563675
CCNB2	PMC	0.867458	1.15066	1.15279	0.164127
	PMS1	3.90167	3.8097	4.18446	0.19531
CENPF	PMC	0.904041	1.07726	1.02681	0.0890908
	PMS1	4.52233	3.42555	4.22671	0.567473
ASPM	PMC	1.02445	0.976131	1.01493	0.0255965
	PMS1	4.81923	4.13088	5.20667	0.544861
IL1B	PMC	1.24313	1.52246	1.02131	0.251123
	PMS2	26.0832	36.049	29.7994	5.03625
NFKBIA	PMC	1.05228	0.932884	1.07194	0.0752555
	PMS2	40.1899	38.4967	39.0091	0.868332
MYC	PMC	0.939995	1.05959	1.01286	0.0602735
	PMS2	3.24893	3.12197	3.00296	0.123006
CASP3	PMC	1.129	1.09092	1.00916	0.0612327
	PMS2	0.353773	0.308275	0.280425	0.0370263
HSP90AA1	PMC	0.937026	1.07229	0.962107	0.0719551
	PMS2	3.85431	4.13822	3.04241	0.568708
FOXO1	PMC	1.0625	1.01861	0.926962	0.0691587
	PMS2	1.52933	2.1603	1.3715	0.417377
SIRT1	PMC	0.960548	1.21484	1.19226	0.140751
	PMS2	3.49212	3.49793	4.20939	0.412447
MAPK8	PMC	1.04971	0.952644	1.02734	0.0508289
	PMS2	4.10336	5.09706	4.88683	0.523684
MYC	PMC	1.05229	0.961719	1.17176	0.10535
	PMS3	19.4	16.5959	16.1286	1.7693
FOXO1	PMC	0.954811	0.898129	1.03523	0.0688912
	PMS3	10.2933	10.1441	9.71502	0.300229
CCND1	PMC	1.10048	0.906688	1.16875	0.135948
	PMS3	10.1622	9.1677	10.9079	0.873041
BCL2L1	PMC	1.10434	1.00414	1.05373	0.0501018
	PMS3	40.9352	45.0139	49.5256	4.29702
NFKBIA	PMC	1.16803	1.13832	0.949496	0.118528
	PMS3	50.692	46.2884	52.1944	3.06945
CASP3	PMC	1.04392	0.909221	1.09161	0.0945901
	PMS3	0.194213	0.237836	0.264858	0.0356462
ESR1	PMC	1.20149	1.09889	0.834105	0.189565
	PMS3	0.572291	0.583278	0.584421	0.00669772
